# Supplementary material for: Integrating microRNA expression, miRNA-mRNA regulation network and signal pathway: a novel strategy for lung cancer biomarker discovery
Source: PeerJ. 2021 Oct 25;9:e12369. doi: 10.7717/peerj.12369 (PMC8552790; doi:10.7717/peerj.12369)
Supplement: Supplemental Information 1 — SDE, significant differentially expressed; FC, fold change; SNR, signal-to-noise ratio. [file peerj-09-12369-s001.xlsx]

## Sheet: TCGA dataset
MIMAT	miRNA	p-value	FC	SNR
MIMAT0000076	hsa-miR-21-5p	3.62e-87	2.02775	1.99177
MIMAT0000087	hsa-miR-30a-5p	2.91e-202	0.128625	1.5038
MIMAT0000088	hsa-miR-30a-3p	1.37e-275	0.123562	2.0553
MIMAT0000095	hsa-miR-96-5p	1.13e-152	6.01999	1.15147
MIMAT0000245	hsa-miR-30d-5p	2.28e-174	0.285903	2.27534
MIMAT0000261	hsa-miR-183-5p	1.42e-144	5.42405	1.12641
MIMAT0000267	hsa-miR-210-3p	4.49e-175	21.3978	1.18813
MIMAT0000275	hsa-miR-218-5p	5.53e-217	0.209778	1.9371
MIMAT0000416	hsa-miR-1-3p	1.94e-254	0.172724	3.09254
MIMAT0000420	hsa-miR-30b-5p	6.69e-103	0.389997	1.67376
MIMAT0000432	hsa-miR-141-3p	5.45e-125	2.7815	1.27351
MIMAT0000436	hsa-miR-144-3p	3.63e-161	0.109849	1.2825
MIMAT0000437	hsa-miR-145-5p	2.16e-111	0.393446	1.85037
MIMAT0000444	hsa-miR-126-5p	2.76e-190	0.244389	1.72308
MIMAT0000445	hsa-miR-126-3p	9.74e-87	0.370875	1.12484
MIMAT0001631	hsa-miR-451a	4.11e-149	0.0987405	1.17259
MIMAT0004494	hsa-miR-21-3p	2.06e-76	2.06662	1.89029
MIMAT0004551	hsa-miR-30d-3p	5.07e-154	0.349447	2.47897
MIMAT0004560	hsa-miR-183-3p	2.43e-134	20.9696	1.00376
MIMAT0004571	hsa-miR-200b-5p	1.16e-111	2.90464	1.03788
MIMAT0004598	hsa-miR-141-5p	2.91e-96	2.3622	1.31856
MIMAT0004600	hsa-miR-144-5p	6.8e-169	0.0773333	1.21915
MIMAT0004601	hsa-miR-145-3p	1.28e-210	0.286929	2.52806
MIMAT0004926	hsa-miR-708-5p	2.22e-141	8.49816	1.05167
MIMAT0004927	hsa-miR-708-3p	2.81e-112	4.80658	1.00889
MIMAT0000062	hsa-let-7a-5p	7.3e-184	0.326355	2.50762
MIMAT0000063	hsa-let-7b-5p	6.3e-169	0.427692	4.62553
MIMAT0000064	hsa-let-7c-5p	4.71e-223	0.315237	4.69661
MIMAT0000067	hsa-let-7f-5p	9.64e-125	0.326827	1.64327
MIMAT0000082	hsa-miR-26a-5p	7.49e-154	0.411268	3.27512
MIMAT0000097	hsa-miR-99a-5p	2.97e-135	0.362977	2.25713
MIMAT0000098	hsa-miR-100-5p	3.23e-97	0.421924	2.58478
MIMAT0000099	hsa-miR-101-3p	3.18e-179	0.238773	1.65238
MIMAT0000250	hsa-miR-139-5p	2.91e-203	0.206805	2.00771
MIMAT0000256	hsa-miR-181a-5p	1.24e-95	0.441758	2.135
MIMAT0000258	hsa-miR-181c-5p	1.71e-82	0.455094	1.80904
MIMAT0000259	hsa-miR-182-5p	5.5e-128	3.81177	1.1088
MIMAT0000276	hsa-miR-219a-5p	5.96e-51	2.06165	1.0277
MIMAT0000280	hsa-miR-223-3p	1.55e-114	0.328393	1.70383
MIMAT0000427	hsa-miR-133a-3p	4.19e-207	0.172139	2.14218
MIMAT0000430	hsa-miR-138-5p	3.35e-159	0.315595	4.99171
MIMAT0000434	hsa-miR-142-3p	2.07e-67	2.11553	1.361
MIMAT0000435	hsa-miR-143-3p	4.26e-202	0.200246	1.83249
MIMAT0000458	hsa-miR-190a-5p	4.21e-229	0.195598	1.93059
MIMAT0000461	hsa-miR-195-5p	4.76e-230	0.218163	2.16089
MIMAT0000681	hsa-miR-29c-3p	4.76e-118	0.434857	3.83787
MIMAT0000688	hsa-miR-301a-3p	4.47e-74	2.25691	1.03561
MIMAT0000691	hsa-miR-130b-3p	1.4e-132	3.92561	1.09406
MIMAT0000727	hsa-miR-374a-5p	1.79e-199	0.388425	3.03532
MIMAT0000756	hsa-miR-326	1.32e-82	0.422243	7.38978
MIMAT0000761	hsa-miR-324-5p	7.11e-65	2.04034	1.1325
MIMAT0000763	hsa-miR-338-3p	8.26e-109	0.239	1.21559
MIMAT0000772	hsa-miR-345-5p	5.44e-118	4.07688	1.07769
MIMAT0001620	hsa-miR-200a-5p	1.08e-108	2.99653	1.18379
MIMAT0002177	hsa-miR-486-5p	4.77e-213	0.0834456	1.56466
MIMAT0002808	hsa-miR-511-5p	9.72e-92	0.413669	1.66987
MIMAT0002820	hsa-miR-497-5p	9.13e-100	0.399321	1.544
MIMAT0002874	hsa-miR-503-5p	2.22e-117	5.95549	1.02818
MIMAT0003249	hsa-miR-584-5p	4.02e-74	0.444168	13.5968
MIMAT0003254	hsa-miR-548b-3p	6.94e-115	0.407406	169.042
MIMAT0003256	hsa-miR-589-3p	1.53e-94	2.89911	1.14483
MIMAT0003266	hsa-miR-598-3p	4.46e-162	0.340508	2.443
MIMAT0003284	hsa-miR-616-5p	1.99e-150	8.81226	1.21991
MIMAT0003298	hsa-miR-629-3p	7.87e-141	4.73826	1.26153
MIMAT0003312	hsa-miR-642a-5p	1.46e-51	2.20904	1.19471
MIMAT0003322	hsa-miR-652-3p	9.34e-99	0.492469	4.94969
MIMAT0003880	hsa-miR-671-5p	7.73e-123	3.55062	1.28166
MIMAT0004493	hsa-miR-20a-3p	7.82e-111	2.78846	1.3628
MIMAT0004501	hsa-miR-27a-5p	5.26e-119	0.281741	1.25595
MIMAT0004509	hsa-miR-93-3p	6.8e-112	2.67838	1.3532
MIMAT0004511	hsa-miR-99a-3p	7.81e-119	0.353913	2.26964
MIMAT0004513	hsa-miR-101-5p	2.71e-160	0.353086	2.11048
MIMAT0004550	hsa-miR-30c-2-3p	0	0.125873	2.55332
MIMAT0004552	hsa-miR-139-3p	2.94e-287	0.135473	2.44688
MIMAT0004553	hsa-miR-7-1-3p	3.82e-85	2.04627	1.71962
MIMAT0004565	hsa-miR-218-1-3p	1.21e-237	0.207022	2.73799
MIMAT0004570	hsa-miR-223-5p	4.4e-97	0.395089	1.9338
MIMAT0004584	hsa-let-7g-3p	2.6e-84	2.46359	1.54488
MIMAT0004597	hsa-miR-140-3p	9.22e-189	0.265214	1.92962
MIMAT0004603	hsa-miR-125b-2-3p	2.44e-114	0.437072	9.16022
MIMAT0004610	hsa-miR-150-3p	1.11e-96	0.413859	3.24305
MIMAT0004615	hsa-miR-195-3p	1.06e-136	0.317126	1.59402
MIMAT0004676	hsa-miR-34b-3p	2.09e-32	0.465143	3.11924
MIMAT0004677	hsa-miR-34c-3p	3.04e-52	0.340144	1.29906
MIMAT0004680	hsa-miR-130b-5p	2.06e-162	5.20724	1.28088
MIMAT0004692	hsa-miR-340-5p	2.92e-94	0.478749	3.45692
MIMAT0004701	hsa-miR-338-5p	4.62e-232	0.169448	2.3368
MIMAT0004766	hsa-miR-146b-3p	1.21e-120	0.405674	2.37179
MIMAT0004784	hsa-miR-455-3p	5.57e-101	3.42614	1.04412
MIMAT0004805	hsa-miR-616-3p	3.03e-117	5.14414	1.2881
MIMAT0004946	hsa-miR-744-3p	1.37e-105	3.86363	1.0146
MIMAT0004955	hsa-miR-374b-5p	5.75e-133	0.485571	2.99885
MIMAT0004982	hsa-miR-939-5p	5.87e-57	2.18184	1.03886
MIMAT0005899	hsa-miR-1247-5p	4.16e-99	0.377862	6.80821
MIMAT0005905	hsa-miR-1254	2.07e-108	6.30163	1.07546
MIMAT0005933	hsa-miR-1277-3p	1.03e-116	5.75345	1.16719
MIMAT0009196	hsa-miR-103a-2-5p	6.66e-103	3.48916	1.08877
MIMAT0009451	hsa-miR-1976	6.87e-143	0.40382	2.69458
MIMAT0015045	hsa-miR-3170	4.24e-81	3.85497	1.0959
MIMAT0015378	hsa-miR-3065-3p	7.95e-84	0.406669	6.3576
MIMAT0016847	hsa-miR-378c	3.34e-157	0.421074	4.02628
MIMAT0016888	hsa-miR-4326	4.62e-64	2.31379	1.03882
MIMAT0017352	hsa-miR-2277-5p	8.07e-97	4.33139	1.07552
MIMAT0017993	hsa-miR-3614-3p	1.83e-117	0.400464	2.8139
MIMAT0018186	hsa-miR-3912-3p	2.64e-147	0.380422	19.4729
MIMAT0018205	hsa-miR-3928-3p	3.66e-58	2.3439	1.02434
MIMAT0019696	hsa-miR-4638-3p	1.9e-101	6.33024	1.01419
MIMAT0019746	hsa-miR-4668-3p	5.16e-133	3.64488	1.46262
MIMAT0019812	hsa-miR-4709-3p	2.32e-66	0.472998	8.30075
MIMAT0019927	hsa-miR-4772-3p	7.89e-75	0.455908	1.51669
MIMAT0022287	hsa-miR-5586-5p	5.68e-79	0.481031	2.16916
MIMAT0022696	hsa-miR-301a-5p	1.13e-121	6.56144	1.05089
MIMAT0022721	hsa-miR-1247-3p	1.77e-156	0.314348	12.9273
MIMAT0022925	hsa-miR-503-3p	5.31e-94	3.38766	1.39966
MIMAT0026606	hsa-miR-511-3p	1.04e-182	0.343194	15.2884
MIMAT0027513	hsa-miR-6806-3p	2.04e-107	0.453102	6.78607
MIMAT0027684	hsa-miR-6892-5p	2.58e-228	0.272835	4.00828
