# Supplementary material for: Integrating microRNA expression, miRNA-mRNA regulation network and signal pathway: a novel strategy for lung cancer biomarker discovery
Source: PeerJ. 2021 Oct 25;9:e12369. doi: 10.7717/peerj.12369 (PMC8552790; doi:10.7717/peerj.12369)
Supplement: Supplemental Information 2 — SDE, significant differentially expressed; FC, fold change; SNR, signal-to-noise ratio. [file peerj-09-12369-s002.xlsx]

## Sheet: GSE102286
miRNA	P-value	FC	SNR
hsa-miR-1	1.34e-10	0.41358	4.16233
hsa-miR-106b	1.28e-11	2.11654	1.69471
hsa-miR-126	1.47e-19	0.239187	2.46258
hsa-miR-1260	2.31e-11	3.08407	1.46813
hsa-miR-1274a	1.44e-08	3.13072	1.1188
hsa-miR-1274b	1.53e-07	2.43647	1.10485
hsa-miR-135b	5.74e-08	3.49668	1.01364
hsa-miR-141	2.17e-08	2.72773	1.37487
hsa-miR-142-5p	5.58e-11	2.92859	1.54281
hsa-miR-144	2.05e-06	0.42819	1.06829
hsa-miR-145	7.36e-17	0.369143	3.45407
hsa-miR-155	1.3e-10	3.00848	1.52782
hsa-miR-183	2.67e-11	5.06455	1.23567
hsa-miR-193b	6.38e-12	3.15816	1.39267
hsa-miR-1975	1.61e-08	2.1521	1.64002
hsa-miR-1979	1.57e-18	3.44622	3.80085
hsa-miR-200b	6.16e-08	2.59807	1.01538
hsa-miR-200c	4.45e-08	2.48801	1.05991
hsa-miR-21	5.91e-14	4.0471	1.61009
hsa-miR-210	2.15e-09	7.47443	1.05394
hsa-miR-218	2.86e-16	0.333999	3.66052
hsa-miR-30a	5.44e-16	0.259049	1.96573
hsa-miR-30b	7.21e-14	0.397955	6.15908
hsa-miR-30d	2.6e-14	0.423693	6.09493
hsa-miR-451	3.31e-14	0.230568	2.34295
hsa-miR-520e	7.94e-11	0.153408	1.51995
hsa-miR-708	3.8e-07	2.53083	1.05532
hsa-miR-720	4.45e-09	2.41938	2.17426
hsa-miR-96	1.31e-15	10.0426	1.55469
