# Supplementary material for: Integrating microRNA expression, miRNA-mRNA regulation network and signal pathway: a novel strategy for lung cancer biomarker discovery
Source: PeerJ. 2021 Oct 25;9:e12369. doi: 10.7717/peerj.12369 (PMC8552790; doi:10.7717/peerj.12369)
Supplement: Supplemental Information 3 [file peerj-09-12369-s003.xlsx]

## Sheet: PPI
from	to	weight
PSMA4	PSMC4	0.999
SF3A1	SNRPD3	0.985
FKBP4	MAPK1	0.918
GRN	MAPK1	0.919
VCL	MAPK1	0.95
PSMA4	RBX1	0.966
PSMC4	RBX1	0.915
SF3A1	PAPOLA	0.932
SNRPD3	PAPOLA	0.903
SLC2A3	ATP6V1D	0.9
SF3A1	CSTF1	0.904
SNRPD3	CSTF1	0.925
PAPOLA	CSTF1	0.958
SIRT1	CSNK2A1	0.921
SUPT16H	CSNK2A1	0.989
SERPIND1	TIMP1	0.932
TIMP1	MMP2	0.976
PSMA4	PSMD7	0.999
PSMC4	PSMD7	0.999
RBX1	PSMD7	0.931
PSMA4	PPP2CB	0.934
PSMC4	PPP2CB	0.928
ZW10	PPP2CB	0.902
MAPK1	PPP2CB	0.924
RBX1	PPP2CB	0.903
PSMD7	PPP2CB	0.908
SF3A1	SF3A2	0.999
SNRPD3	SF3A2	0.998
PAPOLA	SF3A2	0.907
CSTF1	SF3A2	0.907
MAPK1	ERF	0.956
VAMP3	WASL	0.91
VCL	WASL	0.928
PSMA4	PSMA2	0.999
PSMC4	PSMA2	0.999
RBX1	PSMA2	0.964
PSMD7	PSMA2	0.999
PPP2CB	PSMA2	0.931
VAMP3	YKT6	0.907
CNIH1	YKT6	0.926
SF3A1	DDX5	0.937
SNRPD3	DDX5	0.936
PAPOLA	DDX5	0.926
CSTF1	DDX5	0.911
SF3A2	DDX5	0.976
MMP2	COL1A1	0.97
MAPK1	DUSP3	0.972
PSMA4	NFKB1	0.959
PSMC4	NFKB1	0.934
VCL	NFKB1	0.908
SIRT1	NFKB1	0.915
MAPK1	NFKB1	0.954
RBX1	NFKB1	0.919
PSMD7	NFKB1	0.922
PSMA2	NFKB1	0.933
PSMA4	CCND1	0.902
PSMC4	CCND1	0.901
PSMD7	CCND1	0.929
AGO2	CCND1	0.932
PSMA2	CCND1	0.9
OGDH	PDHX	0.996
SLC2A3	MLEC	0.9
ATP6V1D	MLEC	0.9
VAMP3	ARPC3	0.91
MYH9	ARPC3	0.929
WASL	ARPC3	0.983
PSMA4	CDKN1B	0.901
PSMC4	CDKN1B	0.911
MYH9	CDKN1B	0.903
RBX1	CDKN1B	0.947
PSMD7	CDKN1B	0.903
PSMA2	CDKN1B	0.9
CCND1	CDKN1B	0.996
ZW10	NUP107	0.969
SNRPD3	NUP107	0.928
AGO2	NUP107	0.901
PPP2CB	NUP107	0.9
SF3A1	SRSF9	0.913
SNRPD3	SRSF9	0.961
PAPOLA	SRSF9	0.922
CSTF1	SRSF9	0.939
SF3A2	SRSF9	0.978
DDX5	SRSF9	0.924
NUP107	SRSF9	0.904
PSMA4	FBXO5	0.902
PSMC4	FBXO5	0.9
PSMD7	FBXO5	0.9
PSMA2	FBXO5	0.907
PSMA4	GMNN	0.91
PSMC4	GMNN	0.903
PSMD7	GMNN	0.904
PSMA2	GMNN	0.916
FBXO5	GMNN	0.936
SLC2A3	TMEM30A	0.911
ATP6V1D	TMEM30A	0.911
MLEC	TMEM30A	0.9
VCL	PAPD7	0.902
MAPK1	PAPD7	0.904
MMP2	HBEGF	0.944
TIMP1	SPARC	0.947
MMP2	SPARC	0.945
COL1A1	SPARC	0.986
YKT6	LNPEP	0.9
FKBP4	NR3C1	0.982
MAPK1	NR3C1	0.961
NFKB1	NR3C1	0.957
RBX1	UBE3A	0.949
PSMA4	ODC1	0.902
PSMC4	ODC1	0.915
PSMD7	ODC1	0.912
PSMA2	ODC1	0.904
MAPK1	GORASP2	0.968
PPP2CB	PPP3R1	0.922
VAMP3	VAMP4	0.909
WASL	VAMP4	0.913
YKT6	VAMP4	0.947
ARPC3	VAMP4	0.9
DERL2	RNF103	0.928
PSMA4	RPN2	0.917
PSMA2	RPN2	0.902
MOGS	RPN2	0.939
MAPK1	EGR1	0.975
PFN1	PFN2	0.926
CSNK2A1	NCAPH	0.907
NR3C1	TWIST1	0.917
VCL	ZC3HAV1	0.9
MAPK1	ZC3HAV1	0.9
PAPD7	ZC3HAV1	0.9
RPN2	SEC61A1	0.987
SF3A1	SRSF6	0.935
SNRPD3	SRSF6	0.953
PAPOLA	SRSF6	0.931
CSTF1	SRSF6	0.934
SF3A2	SRSF6	0.981
DDX5	SRSF6	0.964
NUP107	SRSF6	0.909
SRSF9	SRSF6	0.993
DERL2	EMC3	0.934
MMP2	EFNB2	0.927
WASL	EFNB2	0.924
KALRN	EFNB2	0.928
EGR1	FOSB	0.94
PFN1	VASP	0.988
PFN2	VASP	0.992
SF3A1	SYMPK	0.923
SNRPD3	SYMPK	0.912
PAPOLA	SYMPK	0.992
CSTF1	SYMPK	0.981
SF3A2	SYMPK	0.912
DDX5	SYMPK	0.922
NUP107	SYMPK	0.912
SRSF9	SYMPK	0.931
SRSF6	SYMPK	0.941
MAPK1	CAPNS1	0.922
MOGS	CANX	0.933
RPN2	CANX	0.954
SEC61A1	CANX	0.916
HBEGF	PTPN12	0.9
MAPK1	YWHAH	0.932
CDKN1B	YWHAH	0.933
LNPEP	YWHAH	0.909
PPP3R1	YWHAH	0.913
CDC25B	YWHAH	0.958
KALRN	MCHR1	0.903
CCR7	MCHR1	0.9
SF3A1	LSM8	0.979
SNRPD3	LSM8	0.999
PAPOLA	LSM8	0.903
CSTF1	LSM8	0.908
SF3A2	LSM8	0.976
DDX5	LSM8	0.934
SRSF9	LSM8	0.928
SRSF6	LSM8	0.919
SYMPK	LSM8	0.903
APEX1	MBD4	0.955
MAPK1	MKNK2	0.964
CNIH1	LMAN1	0.927
YKT6	LMAN1	0.937
RBX1	TRPC4AP	0.938
CDKN1B	TRPC4AP	0.9
ARPC3	ACTR3C	0.916
TMEM30A	BST2	0.9
EGR1	BST2	0.901
ZNF777	TRIM28	0.918
SF3A1	PPIL4	0.969
SNRPD3	PPIL4	0.928
PAPOLA	PPIL4	0.902
CSTF1	PPIL4	0.904
SF3A2	PPIL4	0.918
DDX5	PPIL4	0.918
SRSF9	PPIL4	0.922
SRSF6	PPIL4	0.917
SYMPK	PPIL4	0.902
LSM8	PPIL4	0.935
GRN	ACLY	0.903
MAPK1	ACLY	0.91
ACO2	ACLY	0.968
PCK2	ACLY	0.96
SIRT1	DNAJB1	0.926
RBX1	DCAF15	0.921
CDKN1B	DCAF15	0.902
TRPC4AP	DCAF15	0.904
SUPT16H	SMARCC1	0.969
CCND1	SMARCC1	0.915
NR3C1	SMARCC1	0.949
RBX1	RPA1	0.902
APEX1	RPA1	0.949
HES1	RPA1	0.9
MSH6	RPA1	0.981
BCL9	H3F3B	0.956
HIST1H4F	H3F3B	0.992
KALRN	CHRM3	0.906
MCHR1	CHRM3	0.91
RANBP9	KRAS	0.903
VCL	KRAS	0.937
MAPK1	KRAS	0.985
PPP2CB	KRAS	0.932
NFKB1	KRAS	0.932
PAPD7	KRAS	0.904
HBEGF	KRAS	0.939
ZC3HAV1	KRAS	0.9
EFNB2	KRAS	0.913
YWHAH	KRAS	0.93
ZW10	CCNB1	0.936
PPP2CB	CCNB1	0.934
CCND1	CCNB1	0.935
CDKN1B	CCNB1	0.998
NUP107	CCNB1	0.923
FBXO5	CCNB1	0.989
GMNN	CCNB1	0.919
NCAPH	CCNB1	0.983
CDC25B	CCNB1	0.99
DLGAP5	CCNB1	0.987
YWHAH	CCNB1	0.92
RBX1	CDK7	0.926
SUPT16H	CDK7	0.932
CCND1	CDK7	0.954
CDKN1B	CDK7	0.958
ELL2	CDK7	0.918
TAF4	CDK7	0.937
RPA1	CDK7	0.913
CCNB1	CDK7	0.981
PSMA4	VHL	0.903
PSMC4	VHL	0.9
RBX1	VHL	0.982
PSMD7	VHL	0.9
PSMA2	VHL	0.901
UBE3A	VHL	0.905
HES1	BHLHE40	0.904
BHLHE41	BHLHE40	0.922
CANX	EDEM1	0.927
AGO2	NOTCH2	0.919
HES1	NOTCH2	0.966
JAG1	NOTCH2	0.969
YKT6	ARF3	0.941
RBX1	DDB2	0.979
CDKN1B	DDB2	0.919
TRPC4AP	DDB2	0.908
DCAF15	DDB2	0.924
RPA1	DDB2	0.955
CDK7	DDB2	0.93
RBX1	DZIP1	0.9
PSMA4	APC	0.9
PSMC4	APC	0.9
RBX1	APC	0.9
PSMD7	APC	0.902
PPP2CB	APC	0.904
PSMA2	APC	0.901
BCL9	APC	0.928
MAPK1	TBX3	0.902
CCND1	CDK4	0.999
CDKN1B	CDK4	0.997
SMARCC1	CDK4	0.914
RPA1	CDK4	0.93
CCNB1	CDK4	0.989
CDK7	CDK4	0.96
GRN	GNS	0.941
MAPK1	GNS	0.905
ACLY	GNS	0.9
PPP2CB	MDM2	0.901
NUP107	MDM2	0.914
TRIM28	MDM2	0.956
RPA1	MDM2	0.918
FKBP4	DYNC1LI2	0.902
ZW10	DYNC1LI2	0.923
PPP2CB	DYNC1LI2	0.904
YKT6	DYNC1LI2	0.9
NUP107	DYNC1LI2	0.902
NR3C1	DYNC1LI2	0.9
CCNB1	DYNC1LI2	0.9
ARF3	DYNC1LI2	0.9
SERPIND1	LAMC1	0.9
TIMP1	LAMC1	0.922
LAMA5	LAMC1	0.995
AGO2	EIF4E2	0.906
STRADB	CAB39	0.993
RPA1	REV1	0.921
ZW10	KDELR2	0.9
YKT6	KDELR2	0.911
ARF3	KDELR2	0.922
DYNC1LI2	KDELR2	0.9
SF3A1	SRSF1	0.967
SNRPD3	SRSF1	0.986
PAPOLA	SRSF1	0.937
CSTF1	SRSF1	0.939
SF3A2	SRSF1	0.995
DDX5	SRSF1	0.977
NUP107	SRSF1	0.917
SRSF9	SRSF1	0.998
SRSF6	SRSF1	0.995
SYMPK	SRSF1	0.94
LSM8	SRSF1	0.95
PPIL4	SRSF1	0.919
GRN	SDCBP	0.9
MAPK1	SDCBP	0.908
EFNB2	SDCBP	0.972
ACLY	SDCBP	0.903
GNS	SDCBP	0.908
TIMP1	THBS1	0.978
MMP2	THBS1	0.962
SPARC	THBS1	0.97
SLC2A3	ADAM10	0.905
SERPIND1	ADAM10	0.902
ATP6V1D	ADAM10	0.9
TIMP1	ADAM10	0.967
MLEC	ADAM10	0.902
TMEM30A	ADAM10	0.907
HBEGF	ADAM10	0.911
JAG1	ADAM10	0.966
NOTCH2	ADAM10	0.971
LAMC1	ADAM10	0.908
HES1	TOPBP1	0.9
RPA1	TOPBP1	0.987
MDM2	TOPBP1	0.935
TMEM30A	DNAJC13	0.903
BST2	DNAJC13	0.9
PNN	PPIG	0.91
VAMP3	SYT1	0.957
WASL	SYT1	0.908
ARPC3	SYT1	0.91
VAMP4	SYT1	0.965
AGO2	CCND2	0.919
CCND1	CCND2	0.905
CDKN1B	CCND2	0.996
CCNB1	CCND2	0.931
CDK7	CCND2	0.961
CDK4	CCND2	0.999
RAB22A	RAB21	0.92
SF3A1	PPWD1	0.935
SNRPD3	PPWD1	0.906
PAPOLA	PPWD1	0.912
CSTF1	PPWD1	0.91
SF3A2	PPWD1	0.942
DDX5	PPWD1	0.913
SRSF9	PPWD1	0.904
SRSF6	PPWD1	0.913
SYMPK	PPWD1	0.915
PPIL4	PPWD1	0.941
SRSF1	PPWD1	0.914
PPP2CB	LRP6	0.902
APC	LRP6	0.959
RBX1	UBE2K	0.974
UBE3A	UBE2K	0.977
VHL	UBE2K	0.93
PSMA4	PPP2R5A	0.902
PSMC4	PPP2R5A	0.903
ZW10	PPP2R5A	0.902
RBX1	PPP2R5A	0.905
PSMD7	PPP2R5A	0.902
PPP2CB	PPP2R5A	0.99
PSMA2	PPP2R5A	0.9
NUP107	PPP2R5A	0.903
PPP3R1	PPP2R5A	0.908
KRAS	PPP2R5A	0.912
CCNB1	PPP2R5A	0.937
APC	PPP2R5A	0.942
DYNC1LI2	PPP2R5A	0.902
LRP6	PPP2R5A	0.901
SF3A1	SNW1	0.977
SNRPD3	SNW1	0.997
RBX1	SNW1	0.916
PAPOLA	SNW1	0.918
CSTF1	SNW1	0.903
AGO2	SNW1	0.905
SF3A2	SNW1	0.988
DDX5	SNW1	0.987
CCND1	SNW1	0.915
SRSF9	SNW1	0.911
HES1	SNW1	0.909
SRSF6	SNW1	0.922
SYMPK	SNW1	0.928
LSM8	SNW1	0.922
PPIL4	SNW1	0.948
NOTCH2	SNW1	0.917
SRSF1	SNW1	0.93
PPWD1	SNW1	0.928
JAG1	MIB1	0.975
NOTCH2	MIB1	0.93
RBX1	RNF138	0.9
UBE3A	RNF138	0.904
VHL	RNF138	0.9
UBE2K	RNF138	0.944
PSMA4	USP14	0.999
PSMC4	USP14	0.999
PSMD7	USP14	0.999
PSMA2	USP14	0.998
RBX1	HERC2	0.911
UBE3A	HERC2	0.957
RIF1	HERC2	0.903
VHL	HERC2	0.9
UBE2K	HERC2	0.904
RNF138	HERC2	0.9
VAMP4	ARL1	0.924
CEBPZ	UTP20	0.928
NOL11	UTP20	0.923
DHX33	UTP6	0.951
NOL11	UTP6	0.979
UTP20	UTP6	0.984
ZW10	TAOK1	0.929
PPP2CB	TAOK1	0.913
NUP107	TAOK1	0.9
CCNB1	TAOK1	0.909
DYNC1LI2	TAOK1	0.902
PPP2R5A	TAOK1	0.903
VCL	CDH1	0.987
MAPK1	CDH1	0.973
TWIST1	CDH1	0.923
VASP	CDH1	0.934
CAPNS1	CDH1	0.909
ADAM10	CDH1	0.951
SARS	AARS	0.979
PSMA4	MAPK6	0.909
PSMC4	MAPK6	0.908
PSMD7	MAPK6	0.909
PSMA2	MAPK6	0.91
KALRN	MAPK6	0.903
DNAJB1	MAPK6	0.907
CDH1	SNX1	0.911
SUPT16H	CCNT1	0.923
ELL2	CCNT1	0.968
CDK7	CCNT1	0.986
CDK4	CCNT1	0.948
CCND2	CCNT1	0.91
HCN2	HCN4	0.951
COL1A1	FLT4	0.908
UQCRC1	ATP5B	0.959
ACO2	ATP5B	0.99
ATP6V1D	ATP5B	0.923
SLC25A3	ATP5B	0.974
GMNN	MCM4	0.978
MSH6	MCM4	0.929
NCAPH	MCM4	0.917
RPA1	MCM4	0.999
NASP	MCM4	0.905
CCNB1	MCM4	0.914
PPP2CB	RBL2	0.929
CCND1	RBL2	0.977
CDKN1B	RBL2	0.956
CDK4	RBL2	0.975
CCND2	RBL2	0.992
SNW1	SMAD7	0.911
MAPK1	SMAD2	0.981
SNW1	SMAD2	0.966
CCNT1	SMAD2	0.905
SMAD7	SMAD2	0.962
RPN2	TRAM1	0.925
SEC61A1	TRAM1	0.965
MSH6	RCOR1	0.905
EGR1	RCOR1	0.919
H3F3B	RCOR1	0.962
TRIM28	ZNF175	0.938
RBX1	TRIM37	0.937
UBE3A	TRIM37	0.903
VHL	TRIM37	0.9
UBE2K	TRIM37	0.909
RNF138	TRIM37	0.9
HERC2	TRIM37	0.903
PSMA4	TCEB2	0.933
PSMC4	TCEB2	0.915
RBX1	TCEB2	0.995
SUPT16H	TCEB2	0.9
PSMD7	TCEB2	0.93
PSMA2	TCEB2	0.932
UBE3A	TCEB2	0.925
CDK7	TCEB2	0.901
VHL	TCEB2	0.998
UBE2K	TCEB2	0.925
RNF138	TCEB2	0.901
HERC2	TCEB2	0.903
CCNT1	TCEB2	0.935
TRIM37	TCEB2	0.9
RBX1	MGRN1	0.9
UBE3A	MGRN1	0.924
VHL	MGRN1	0.9
UBE2K	MGRN1	0.909
RNF138	MGRN1	0.9
HERC2	MGRN1	0.909
TRIM37	MGRN1	0.904
TCEB2	MGRN1	0.9
TAF4	KANSL1	0.902
VCL	ERP44	0.91
NFKB1	ERP44	0.912
PSMA4	CCNE1	0.905
PSMC4	CCNE1	0.906
PSMD7	CCNE1	0.916
PSMA2	CCNE1	0.904
CCND1	CCNE1	0.93
CDKN1B	CCNE1	0.999
CCNB1	CCNE1	0.953
CDK7	CCNE1	0.963
CDK4	CCNE1	0.999
CCND2	CCNE1	0.939
RBL2	CCNE1	0.989
PSMA4	AJUBA	0.9
PSMC4	AJUBA	0.9
RBX1	AJUBA	0.9
PSMD7	AJUBA	0.9
PSMA2	AJUBA	0.901
VHL	AJUBA	0.906
CDH1	AJUBA	0.963
TCEB2	AJUBA	0.9
VCL	TIMP2	0.913
MMP2	TIMP2	0.999
NFKB1	TIMP2	0.908
ERP44	TIMP2	0.9
RBX1	HACE1	0.92
UBE3A	HACE1	0.919
VHL	HACE1	0.906
UBE2K	HACE1	0.945
RNF138	HACE1	0.907
HERC2	HACE1	0.915
TRIM37	HACE1	0.906
TCEB2	HACE1	0.905
MGRN1	HACE1	0.906
AGO2	E2F3	0.938
CCND1	E2F3	0.973
CDKN1B	E2F3	0.957
CDK4	E2F3	0.978
CCND2	E2F3	0.961
SNW1	E2F3	0.902
RBL2	E2F3	0.957
CCNE1	E2F3	0.969
CDK7	TCF3	0.904
MAPK1	GAB1	0.958
PAG1	GAB1	0.911
WASL	GAB1	0.927
ARPC3	GAB1	0.9
HBEGF	GAB1	0.904
TRIM28	ZNF264	0.923
CCND1	SMARCB1	0.97
NR3C1	SMARCB1	0.947
SMARCC1	SMARCB1	0.999
CDK4	SMARCB1	0.948
AGO2	DGCR8	0.963
DDX5	DGCR8	0.973
DIMT1	DDX18	0.902
DHX33	DDX18	0.931
CEBPZ	DDX18	0.937
UTP20	DDX18	0.909
FKBP4	EP300	0.913
SIRT1	EP300	0.994
RBX1	EP300	0.928
AGO2	EP300	0.929
DDX5	EP300	0.951
NFKB1	EP300	0.96
CCND1	EP300	0.97
NR3C1	EP300	0.979
HES1	EP300	0.929
FOSB	EP300	0.946
DNAJB1	EP300	0.917
RPA1	EP300	0.909
KRAS	EP300	0.944
CDK7	EP300	0.928
NOTCH2	EP300	0.938
MDM2	EP300	0.975
THBS1	EP300	0.918
CCND2	EP300	0.928
RORA	EP300	0.958
SNW1	EP300	0.948
SMAD2	EP300	0.972
SRCAP	EP300	0.938
AJUBA	EP300	0.906
E2F3	EP300	0.937
TCF3	EP300	0.996
EGR1	EED	0.918
HIST1H4F	EED	0.925
KDM6B	EED	0.943
RCOR1	EED	0.928
AJUBA	EED	0.902
E2F3	EED	0.926
EP300	EED	0.918
CCNT1	BRD4	0.973
HIST1H4F	ASF1B	0.939
H3F3B	ASF1B	0.957
NASP	ASF1B	0.986
MCM4	ASF1B	0.907
AGO2	NOTCH3	0.908
HES1	NOTCH3	0.963
DLGAP5	NOTCH3	0.915
JAG1	NOTCH3	0.969
NOTCH2	NOTCH3	0.907
ADAM10	NOTCH3	0.967
SNW1	NOTCH3	0.94
MIB1	NOTCH3	0.936
EP300	NOTCH3	0.931
SIRT1	TAF1B	0.938
CDK7	TAF1B	0.902
EP300	TAF1B	0.939
ZW10	CLASP1	0.963
PPP2CB	CLASP1	0.902
CLIP2	CLASP1	0.919
NUP107	CLASP1	0.91
CCNB1	CLASP1	0.914
DYNC1LI2	CLASP1	0.902
PPP2R5A	CLASP1	0.908
TAOK1	CLASP1	0.902
TUBGCP3	CLASP1	0.916
AJUBA	CLASP1	0.9
VPS4A	CHMP2B	0.995
VAMP3	VAMP8	0.939
SLC2A3	VAMP8	0.904
ATP6V1D	VAMP8	0.905
WASL	VAMP8	0.908
YKT6	VAMP8	0.917
MLEC	VAMP8	0.9
ARPC3	VAMP8	0.911
TMEM30A	VAMP8	0.913
VAMP4	VAMP8	0.911
BST2	VAMP8	0.905
SORT1	VAMP8	0.917
GNS	VAMP8	0.9
ADAM10	VAMP8	0.902
DNAJC13	VAMP8	0.912
SYT1	VAMP8	0.953
CTTNBP2	STRN	0.947
PPP2CB	STRN	0.932
ZW10	KIF1B	0.91
ARF3	KIF1B	0.912
KDELR2	KIF1B	0.9
BRF2	GTF3C3	0.957
NR3C1	GTF3C3	0.9
VCL	PIK3CA	0.915
NFKB1	PIK3CA	0.933
HBEGF	PIK3CA	0.915
NR3C1	PIK3CA	0.919
EFNB2	PIK3CA	0.919
MCHR1	PIK3CA	0.9
CHRM3	PIK3CA	0.9
KRAS	PIK3CA	0.998
CDH1	PIK3CA	0.949
FLT4	PIK3CA	0.946
TYROBP	PIK3CA	0.903
GAB1	PIK3CA	0.915
CDH1	PVRL1	0.966
ZW10	ARCN1	0.905
YKT6	ARCN1	0.938
ARF3	ARCN1	0.94
DYNC1LI2	ARCN1	0.902
KDELR2	ARCN1	0.916
KIF1B	ARCN1	0.908
VAMP3	CBL	0.901
PPP2CB	CBL	0.9
WASL	CBL	0.913
ARPC3	CBL	0.9
VAMP4	CBL	0.9
SYT1	CBL	0.902
VAMP8	CBL	0.9
PIK3CA	CBL	0.942
MAPK1	ATF2	0.982
CCND1	ATF2	0.962
NR3C1	ATF2	0.92
EGR1	ATF2	0.942
SMARCC1	ATF2	0.902
RCOR1	ATF2	0.904
SMARCB1	ATF2	0.904
EP300	ATF2	0.958
EED	ATF2	0.908
GMNN	MCM6	0.998
RPA1	MCM6	0.999
MCM4	MCM6	0.999
SUPT16H	CCNT2	0.902
ELL2	CCNT2	0.941
CDK7	CCNT2	0.972
CDK4	CCNT2	0.925
CCND2	CCNT2	0.919
CCNT1	CCNT2	0.909
SMAD2	CCNT2	0.903
TCEB2	CCNT2	0.915
CEBPZ	NOP58	0.987
NOL11	NOP58	0.945
UTP20	NOP58	0.997
UTP6	NOP58	0.998
DDX18	NOP58	0.994
MAPK1	YWHAE	0.937
NFKB1	YWHAE	0.919
CDKN1B	YWHAE	0.943
LNPEP	YWHAE	0.909
PPP3R1	YWHAE	0.912
CDC25B	YWHAE	0.972
YWHAH	YWHAE	0.984
KRAS	YWHAE	0.929
CCNB1	YWHAE	0.919
SORT1	YWHAE	0.902
TUBGCP3	YWHAE	0.902
AJUBA	YWHAE	0.9
CLASP1	YWHAE	0.914
KRAS	RAPGEF2	0.943
CNIH1	SEC22C	0.916
YKT6	SEC22C	0.981
LMAN1	SEC22C	0.913
GLG1	FGF2	0.921
MAPK1	FGF2	0.974
KRAS	FGF2	0.952
GAB1	FGF2	0.917
PIK3CA	FGF2	0.926
CBL	FGF2	0.915
SIRT1	HDAC4	0.988
CCND1	HDAC4	0.94
NUP107	HDAC4	0.907
SNW1	HDAC4	0.902
EP300	HDAC4	0.967
YWHAE	HDAC4	0.958
ATP6V1D	ATP6V0A1	0.998
CD38	NNT	0.901
SERPIND1	MGAT4A	0.9
TIMP1	MGAT4A	0.9
LAMC1	MGAT4A	0.9
ADAM10	MGAT4A	0.9
RAB22A	RAB7A	0.955
DYNC1LI2	RAB7A	0.922
RAB21	RAB7A	0.934
CDH1	RAB7A	0.923
XYLT2	VCAN	0.91
CHPF2	VCAN	0.912
SERPIND1	VCAN	0.905
TIMP1	VCAN	0.946
CHSY1	VCAN	0.921
LAMC1	VCAN	0.917
ADAM10	VCAN	0.912
MGAT4A	VCAN	0.9
SERPIND1	STC2	0.9
TIMP1	STC2	0.905
LAMC1	STC2	0.915
ADAM10	STC2	0.9
MGAT4A	STC2	0.9
VCAN	STC2	0.916
RBX1	FBXW11	0.982
NFKB1	FBXW11	0.932
FBXO5	FBXW11	0.918
UBE3A	FBXW11	0.918
VHL	FBXW11	0.9
UBE2K	FBXW11	0.916
RNF138	FBXW11	0.904
HERC2	FBXW11	0.9
TRIM37	FBXW11	0.931
TCEB2	FBXW11	0.902
MGRN1	FBXW11	0.9
HACE1	FBXW11	0.916
VCL	PAPSS1	0.9
MAPK1	PAPSS1	0.9
PAPD7	PAPSS1	0.9
ZC3HAV1	PAPSS1	0.902
KRAS	PAPSS1	0.902
IMPAD1	PAPSS1	0.934
SUPT16H	AFF4	0.908
ELL2	AFF4	0.996
CDK7	AFF4	0.932
CCNT1	AFF4	0.999
TCEB2	AFF4	0.905
CCNT2	AFF4	0.996
CHL1	NRP1	0.931
FLT4	NRP1	0.918
RIF1	NBN	0.907
TRIM28	NBN	0.935
RPA1	NBN	0.927
TOPBP1	NBN	0.975
HERC2	NBN	0.913
RPA1	POLA2	0.986
MCM4	POLA2	0.997
MCM6	POLA2	0.992
MAPK1	PRKAR2A	0.926
CCNB1	PRKAR2A	0.905
CCND1	SMARCA2	0.918
SMARCC1	SMARCA2	0.999
CDK4	SMARCA2	0.926
SMARCB1	SMARCA2	0.999
VAMP3	PIK3C2A	0.903
WASL	PIK3C2A	0.915
ARPC3	PIK3C2A	0.901
VAMP4	PIK3C2A	0.903
SORT1	PIK3C2A	0.904
SYT1	PIK3C2A	0.9
VAMP8	PIK3C2A	0.903
CBL	PIK3C2A	0.905
MMP2	TIMP3	0.985
PIK3CA	CPSF6	0.9
FGF2	CPSF6	0.9
SLC2A3	SLC15A4	0.916
ATP6V1D	SLC15A4	0.9
MLEC	SLC15A4	0.9
TMEM30A	SLC15A4	0.9
ADAM10	SLC15A4	0.902
VAMP8	SLC15A4	0.9
AGO2	TARBP2	0.996
DGCR8	TARBP2	0.954
KRAS	ERBB3	0.982
PIK3CA	ERBB3	0.979
MAPK1	IGF1R	0.934
YWHAH	IGF1R	0.921
KRAS	IGF1R	0.941
MDM2	IGF1R	0.921
CDH1	IGF1R	0.974
PIK3CA	IGF1R	0.984
TOPBP1	TICRR	0.936
VCL	IQGAP1	0.948
MAPK1	IQGAP1	0.979
PAPD7	IQGAP1	0.9
ZC3HAV1	IQGAP1	0.902
KRAS	IQGAP1	0.942
CDH1	IQGAP1	0.984
PAPSS1	IQGAP1	0.913
PRKAR2A	IQGAP1	0.903
TMEM97	NPC1	0.946
PSMA4	TP53	0.905
PSMC4	TP53	0.912
SIRT1	TP53	0.996
MAPK1	TP53	0.985
SUPT16H	TP53	0.929
APEX1	TP53	0.91
CSNK2A1	TP53	0.971
PSMD7	TP53	0.909
AGO2	TP53	0.973
PPP2CB	TP53	0.909
PSMA2	TP53	0.907
DDX5	TP53	0.979
CCND1	TP53	0.963
CDKN1B	TP53	0.982
CNOT2	TP53	0.912
NR3C1	TP53	0.971
UBE3A	TP53	0.957
EIF2AK2	TP53	0.95
EGR1	TP53	0.987
YWHAH	TP53	0.912
TAF4	TP53	0.923
TRIM28	TP53	0.963
SESN2	TP53	0.974
RPA1	TP53	0.994
KRAS	TP53	0.924
SORT1	TP53	0.906
DDB2	TP53	0.984
MDM2	TP53	0.999
TOPBP1	TP53	0.973
RBL2	TP53	0.951
RCOR1	TP53	0.94
CCNE1	TP53	0.978
DGCR8	TP53	0.946
EP300	TP53	0.999
EED	TP53	0.923
PIK3CA	TP53	0.907
ATF2	TP53	0.938
YWHAE	TP53	0.954
NBN	TP53	0.954
TIMP3	TP53	0.969
IGF1R	TP53	0.904
HBEGF	ERBB2	0.977
PTPN12	ERBB2	0.961
KRAS	ERBB2	0.991
GAB1	ERBB2	0.959
PIK3CA	ERBB2	0.986
CBL	ERBB2	0.91
ERBB3	ERBB2	0.962
TP53	ERBB2	0.945
SERPIND1	IGFBP4	0.913
TIMP1	IGFBP4	0.934
LAMC1	IGFBP4	0.914
ADAM10	IGFBP4	0.901
LRP6	IGFBP4	0.956
MGAT4A	IGFBP4	0.9
VCAN	IGFBP4	0.931
STC2	IGFBP4	0.943
SYMPK	DMWD	0.929
SNRPD3	GEMIN7	0.961
NUP107	GEMIN7	0.903
TRIM28	ZNF614	0.903
VAMP3	FNBP1L	0.906
WASL	FNBP1L	0.997
ARPC3	FNBP1L	0.929
VAMP4	FNBP1L	0.902
SYT1	FNBP1L	0.902
VAMP8	FNBP1L	0.9
CBL	FNBP1L	0.901
PIK3C2A	FNBP1L	0.92
STRN	CTTNBP2NL	0.954
PSMA4	PSMA5	0.999
PSMC4	PSMA5	0.999
RBX1	PSMA5	0.934
PSMD7	PSMA5	0.999
PPP2CB	PSMA5	0.928
PSMA2	PSMA5	0.999
NFKB1	PSMA5	0.93
CCND1	PSMA5	0.901
CDKN1B	PSMA5	0.9
FBXO5	PSMA5	0.913
GMNN	PSMA5	0.911
ODC1	PSMA5	0.906
RPN2	PSMA5	0.906
VHL	PSMA5	0.9
APC	PSMA5	0.9
PPP2R5A	PSMA5	0.9
USP14	PSMA5	0.998
MAPK6	PSMA5	0.905
TCEB2	PSMA5	0.964
CCNE1	PSMA5	0.904
AJUBA	PSMA5	0.9
TP53	PSMA5	0.912
SF3A1	PRCC	0.908
SNRPD3	PRCC	0.902
PAPOLA	PRCC	0.907
CSTF1	PRCC	0.902
SF3A2	PRCC	0.974
DDX5	PRCC	0.912
SRSF9	PRCC	0.901
SRSF6	PRCC	0.919
SYMPK	PRCC	0.912
LSM8	PRCC	0.902
PPIL4	PRCC	0.905
SRSF1	PRCC	0.902
PPWD1	PRCC	0.906
SNW1	PRCC	0.945
SIRT1	MEF2D	0.924
TCF3	MEF2D	0.935
EP300	MEF2D	0.988
HDAC4	MEF2D	0.975
SF3A1	SF3B4	0.998
SNRPD3	SF3B4	0.986
PAPOLA	SF3B4	0.908
CSTF1	SF3B4	0.923
SF3A2	SF3B4	0.999
DDX5	SF3B4	0.913
SRSF9	SF3B4	0.911
SRSF6	SF3B4	0.955
SYMPK	SF3B4	0.913
LSM8	SF3B4	0.976
PPIL4	SF3B4	0.917
SRSF1	SF3B4	0.924
PPWD1	SF3B4	0.924
SNW1	SF3B4	0.978
PRCC	SF3B4	0.909
FAM13B	RHOB	0.914
MYH9	RHOB	0.929
CDKN1B	RHOB	0.917
KALRN	RHOB	0.949
ARHGEF9	RHOB	0.937
ARHGAP29	RHOB	0.921
ERBB2	RHOB	0.945
SF3A1	POLR2D	0.901
SNRPD3	POLR2D	0.927
RBX1	POLR2D	0.912
PAPOLA	POLR2D	0.902
SUPT16H	POLR2D	0.938
CSTF1	POLR2D	0.902
AGO2	POLR2D	0.904
SF3A2	POLR2D	0.905
DDX5	POLR2D	0.905
SRSF9	POLR2D	0.921
ELL2	POLR2D	0.9
SRSF6	POLR2D	0.926
SYMPK	POLR2D	0.9
LSM8	POLR2D	0.911
TAF4	POLR2D	0.902
PPIL4	POLR2D	0.904
RPA1	POLR2D	0.904
CDK7	POLR2D	0.929
SRSF1	POLR2D	0.921
PPWD1	POLR2D	0.902
SNW1	POLR2D	0.914
CCNT1	POLR2D	0.9
TCEB2	POLR2D	0.905
AJUBA	POLR2D	0.9
EP300	POLR2D	0.913
EED	POLR2D	0.902
CCNT2	POLR2D	0.9
FGF2	POLR2D	0.9
AFF4	POLR2D	0.9
PRCC	POLR2D	0.902
SF3B4	POLR2D	0.902
SMAD2	CTDSP1	0.937
CNOT2	RQCD1	0.999
TP53	RQCD1	0.901
SMAD2	CTDSPL	0.933
DERL2	2021-03-06	0.967
MAPK1	RASA1	0.944
EFNB2	RASA1	0.926
KRAS	RASA1	0.968
ARHGEF9	GABRB2	0.91
CDH1	GNA12	0.943
RHOB	GNA12	0.929
VAMP3	EGFR	0.918
MAPK1	EGFR	0.965
PAG1	EGFR	0.941
PPP2CB	EGFR	0.924
WASL	EGFR	0.961
CCND1	EGFR	0.917
ARPC3	EGFR	0.904
HBEGF	EGFR	0.993
VAMP4	EGFR	0.9
PTPN12	EGFR	0.963
KRAS	EGFR	0.998
SYT1	EGFR	0.919
PPP2R5A	EGFR	0.906
CDH1	EGFR	0.995
GAB1	EGFR	0.986
NOTCH3	EGFR	0.959
VAMP8	EGFR	0.907
PIK3CA	EGFR	0.99
CBL	EGFR	0.998
FGF2	EGFR	0.931
PIK3C2A	EGFR	0.952
ERBB3	EGFR	0.988
TP53	EGFR	0.964
ERBB2	EGFR	0.971
FNBP1L	EGFR	0.914
RASA1	EGFR	0.968
EIF4E2	GIGYF1	0.994
RHOB	DLC1	0.951
ATP6V1D	ATP6V1B2	0.999
ATP6V0A1	ATP6V1B2	0.989
TP53	TNFRSF10B	0.985
DERL2	ERLIN2	0.911
KRAS	ERLIN2	0.9
GAB1	ERLIN2	0.9
PIK3CA	ERLIN2	0.9
FGF2	ERLIN2	0.902
CPSF6	ERLIN2	0.9
KRAS	NTRK2	0.942
KIDINS220	NTRK2	0.959
GAB1	NTRK2	0.94
PIK3CA	NTRK2	0.928
RASA1	NTRK2	0.904
RBX1	NOTCH1	0.928
AGO2	NOTCH1	0.93
CCND1	NOTCH1	0.982
HES1	NOTCH1	0.99
JAG1	NOTCH1	0.969
NOTCH2	NOTCH1	0.913
APC	NOTCH1	0.942
ADAM10	NOTCH1	0.989
SNW1	NOTCH1	0.956
MIB1	NOTCH1	0.944
E2F3	NOTCH1	0.944
EP300	NOTCH1	0.974
NOTCH3	NOTCH1	0.933
HDAC4	NOTCH1	0.935
TP53	NOTCH1	0.917
EGFR	NOTCH1	0.901
OGDH	GLUD1	0.958
ACLY	GLUD1	0.914
SYT1	LIN7C	0.908
SUPT16H	SSRP1	0.999
CSNK2A1	SSRP1	0.989
CDK7	SSRP1	0.913
CCNT1	SSRP1	0.923
MCM4	SSRP1	0.947
TCEB2	SSRP1	0.902
CCNT2	SSRP1	0.901
AFF4	SSRP1	0.913
TP53	SSRP1	0.929
POLR2D	SSRP1	0.931
MYH9	PAK1	0.919
KALRN	PAK1	0.933
EFNB2	PAK1	0.911
LAMA5	PAK1	0.9
KRAS	PAK1	0.944
LAMC1	PAK1	0.902
MAPK6	PAK1	0.92
NRP1	PAK1	0.901
EIF5	RPS3	0.948
RPN2	RPS3	0.903
SEC61A1	RPS3	0.997
NOL11	RPS3	0.911
UTP20	RPS3	0.908
UTP6	RPS3	0.91
TRAM1	RPS3	0.9
NOP58	RPS3	0.944
SMG9	RPS3	0.901
SIRT1	MTA2	0.924
EGR1	MTA2	0.903
RCOR1	MTA2	0.926
EP300	MTA2	0.922
EED	MTA2	0.907
TAF1B	MTA2	0.905
ATF2	MTA2	0.909
TP53	MTA2	0.956
RBX1	COMMD7	0.905
VHL	COMMD7	0.9
DDB2	COMMD7	0.9
TCEB2	COMMD7	0.904
FBXW11	COMMD7	0.9
SERPIND1	PRSS23	0.9
TIMP1	PRSS23	0.911
LAMC1	PRSS23	0.906
ADAM10	PRSS23	0.905
MGAT4A	PRSS23	0.9
VCAN	PRSS23	0.909
STC2	PRSS23	0.904
IGFBP4	PRSS23	0.908
MKKS	CCT5	0.991
CCNE1	CCT5	0.903
TP53	CCT5	0.924
WASL	DOCK1	0.954
PAK1	DOCK1	0.917
OGDH	DLAT	0.998
PDHX	DLAT	0.986
ACLY	DLAT	0.973
CDH1	FER	0.999
CDH1	TJP1	0.986
EFNB2	EPHA4	0.999
ADAM10	EPHA4	0.933
CBL	EPHA4	0.928
TRIM28	ZNF773	0.903
TRIM28	ZNF551	0.904
HDAC4	CAMK4	0.961
MEF2D	CAMK4	0.937
FLT4	FLT1	0.975
PIK3CA	FLT1	0.954
CBL	FLT1	0.955
FGF2	FLT1	0.909
NRP1	FLT1	0.995
RASA1	FLT1	0.922
MAPK1	GJA1	0.925
TJP1	GJA1	0.994
RAB22A	RAB3C	0.909
RAB21	RAB3C	0.912
RAB7A	RAB3C	0.913
EP300	MED21	0.91
ZC3H13	MED21	0.993
SMARCC1	SMARCA5	0.919
EP300	SMARCA5	0.952
TAF1B	SMARCA5	0.903
ARID4B	SMARCA5	0.934
RANBP9	RMND5A	0.984
GID4	RMND5A	0.971
PGD	RPIA	0.988
ACO2	TOMM70A	0.929
USP30	TOMM70A	0.926
ATP5B	TOMM70A	0.933
TIMP1	OLA1	0.9
SPARC	OLA1	0.9
THBS1	OLA1	0.9
ATP6V1D	ATP5G3	0.914
ATP5B	ATP5G3	0.999
SERPIND1	APP	0.904
MAPK1	APP	0.95
TIMP1	APP	0.926
NFKB1	APP	0.917
SPARC	APP	0.919
KALRN	APP	0.92
CAPNS1	APP	0.909
CCR7	APP	0.915
MCHR1	APP	0.902
CHRM3	APP	0.909
LAMC1	APP	0.912
SORL1	APP	0.994
THBS1	APP	0.944
ADAM10	APP	0.988
PIK3CA	APP	0.908
MGAT4A	APP	0.903
VCAN	APP	0.914
STC2	APP	0.903
IGFBP4	APP	0.905
NOTCH1	APP	0.9
PRSS23	APP	0.904
OLA1	APP	0.907
THBS1	ADAMTS1	0.932
THBS1	ADAMTS5	0.921
ADAMTS1	ADAMTS5	0.918
VAMP4	RAB6B	0.94
RAB22A	RAB6B	0.918
DYNC1LI2	RAB6B	0.907
RAB21	RAB6B	0.91
ARL1	RAB6B	0.96
RAB7A	RAB6B	0.925
RAB3C	RAB6B	0.926
CCT5	LONP2	0.919
DIMT1	NIFK	0.94
CEBPZ	NIFK	0.947
FKBP15	NIFK	0.926
DDX18	NIFK	0.997
NOP58	NIFK	0.993
LRP6	FZD7	0.954
SNRPD3	LSM11	0.95
SYMPK	LSM11	0.9
NAA50	NAA11	0.934
NAA25	NAA11	0.91
RBX1	UBE2L6	0.955
UBE3A	UBE2L6	0.977
EIF2AK2	UBE2L6	0.925
RPA1	UBE2L6	0.903
VHL	UBE2L6	0.9
EIF4E2	UBE2L6	0.913
REV1	UBE2L6	0.909
UBE2K	UBE2L6	0.91
RNF138	UBE2L6	0.916
HERC2	UBE2L6	0.909
TRIM37	UBE2L6	0.904
TCEB2	UBE2L6	0.9
MGRN1	UBE2L6	0.905
HACE1	UBE2L6	0.927
FBXW11	UBE2L6	0.912
KRAS	BAG4	0.901
GAB1	BAG4	0.9
PIK3CA	BAG4	0.915
FGF2	BAG4	0.9
CPSF6	BAG4	0.902
ERLIN2	BAG4	0.943
CD38	NMNAT2	0.922
NNT	NMNAT2	0.922
PDHX	PDPR	0.945
DLAT	PDPR	0.927
VCL	BRAF	0.905
MAPK1	BRAF	0.964
PPP2CB	BRAF	0.937
PAPD7	BRAF	0.9
ZC3HAV1	BRAF	0.9
YWHAH	BRAF	0.956
KRAS	BRAF	0.997
KIDINS220	BRAF	0.916
PPP2R5A	BRAF	0.915
YWHAE	BRAF	0.973
PAPSS1	BRAF	0.902
IQGAP1	BRAF	0.96
PFN1	FMNL2	0.929
PFN2	FMNL2	0.929
ATG3	WIPI2	0.988
SIRT1	HIST1H2BD	0.924
AGO2	HIST1H2BD	0.9
CCND1	HIST1H2BD	0.901
BCL9	HIST1H2BD	0.923
RIF1	HIST1H2BD	0.9
FOSB	HIST1H2BD	0.905
RPA1	HIST1H2BD	0.908
KDM6B	HIST1H2BD	0.929
CCNB1	HIST1H2BD	0.919
CDK4	HIST1H2BD	0.903
THBS1	HIST1H2BD	0.9
HERC2	HIST1H2BD	0.903
RCOR1	HIST1H2BD	0.915
AJUBA	HIST1H2BD	0.9
EP300	HIST1H2BD	0.928
EED	HIST1H2BD	0.917
TAF1B	HIST1H2BD	0.901
ATF2	HIST1H2BD	0.9
ARID4B	HIST1H2BD	0.929
NBN	HIST1H2BD	0.9
POLR2D	HIST1H2BD	0.903
MTA2	HIST1H2BD	0.9
SMARCA5	HIST1H2BD	0.914
VCL	KPNB1	0.902
NFKB1	KPNB1	0.928
NUP107	KPNB1	0.978
ERP44	KPNB1	0.902
TIMP2	KPNB1	0.9
CSE1L	KPNB1	0.914
PAK1	ELMO2	0.9
DOCK1	ELMO2	0.994
VCL	ARAF	0.901
MAPK1	ARAF	0.949
PPP2CB	ARAF	0.926
PAPD7	ARAF	0.9
ZC3HAV1	ARAF	0.901
KRAS	ARAF	0.991
PPP2R5A	ARAF	0.916
PAPSS1	ARAF	0.902
IQGAP1	ARAF	0.919
BRAF	ARAF	0.952
CCND1	BTG2	0.963
CNOT2	BTG2	0.909
TP53	BTG2	0.974
RQCD1	BTG2	0.917
DERL2	AMFR	0.997
ERLIN2	AMFR	0.935
SF3A2	U2AFBP	0.955
CNIH1	TRAPPC10	0.9
YKT6	TRAPPC10	0.918
LMAN1	TRAPPC10	0.92
SEC22C	TRAPPC10	0.905
RBX1	RNF126	0.917
UBE3A	RNF126	0.915
VHL	RNF126	0.908
UBE2K	RNF126	0.932
RNF138	RNF126	0.902
HERC2	RNF126	0.912
TRIM37	RNF126	0.901
TCEB2	RNF126	0.907
MGRN1	RNF126	0.903
HACE1	RNF126	0.911
FBXW11	RNF126	0.908
UBE2L6	RNF126	0.916
TRIM28	ZNF585A	0.903
ITGB8	ITGA5	0.918
FLT4	ITGA5	0.947
EP300	MED11	0.9
MED21	MED11	0.996
PSMC4	EIF4A1	0.933
EIF5	EIF4A1	0.984
CNOT2	EIF4A1	0.91
EIF4E2	EIF4A1	0.97
RQCD1	EIF4A1	0.919
RPS3	EIF4A1	0.986
PDCD4	EIF4A1	0.999
UBE2L6	EIF4A1	0.903
TRIM28	ZNF496	0.942
TCF3	NEUROD1	0.975
SNRPD3	NUP35	0.913
AGO2	NUP35	0.902
NUP107	NUP35	0.993
SRSF9	NUP35	0.921
SRSF6	NUP35	0.906
SYMPK	NUP35	0.902
CCNB1	NUP35	0.919
MDM2	NUP35	0.902
SRSF1	NUP35	0.918
HDAC4	NUP35	0.904
GEMIN7	NUP35	0.904
KPNB1	NUP35	0.935
GNPNAT1	GNPDA2	0.941
MAPK1	MITF	0.979
EP300	MITF	0.954
KALRN	PROK2	0.9
MCHR1	PROK2	0.9
CHRM3	PROK2	0.9
PIK3CA	PROK2	0.9
APP	PROK2	0.901
SERPIND1	FSTL1	0.9
TIMP1	FSTL1	0.919
LAMC1	FSTL1	0.932
ADAM10	FSTL1	0.902
MGAT4A	FSTL1	0.9
VCAN	FSTL1	0.914
STC2	FSTL1	0.91
IGFBP4	FSTL1	0.919
PRSS23	FSTL1	0.911
APP	FSTL1	0.907
MOGS	STT3B	0.952
RPN2	STT3B	0.999
SEC61A1	STT3B	0.94
MAPK1	ABI2	0.904
WASL	ABI2	0.975
ARPC3	ABI2	0.948
DOCK1	ABI2	0.939
ELMO2	ABI2	0.948
PAPOLA	THOC7	0.905
CSTF1	THOC7	0.909
NUP107	THOC7	0.911
SRSF9	THOC7	0.909
SRSF6	THOC7	0.905
SYMPK	THOC7	0.902
SRSF1	THOC7	0.907
NUP35	THOC7	0.912
STRN	SLMAP	0.974
CCR7	CXCL5	0.938
MCHR1	CXCL5	0.9
APP	CXCL5	0.906
MCHR1	LZTFL1	0.918
VCL	ITGB5	0.935
ITGB8	ITGB5	0.907
ITGA5	ITGB5	0.963
RBX1	UBXN7	0.964
VHL	UBXN7	0.916
TCEB2	UBXN7	0.925
COMMD7	UBXN7	0.9
ITGB5	EDIL3	0.918
EIF5	RPS23	0.941
RPN2	RPS23	0.9
SEC61A1	RPS23	0.998
NOL11	RPS23	0.913
UTP20	RPS23	0.9
UTP6	RPS23	0.978
TRAM1	RPS23	0.9
NOP58	RPS23	0.98
SMG9	RPS23	0.902
RPS3	RPS23	0.999
EIF4A1	RPS23	0.951
CSNK2A1	MAP1B	0.908
RHEB	RICTOR	0.916
ACO2	HSPA9	0.961
NUP107	HSPA9	0.907
DNAJB1	HSPA9	0.989
ATP5B	HSPA9	0.976
DNAJB6	HSPA9	0.966
TOMM70A	HSPA9	0.966
BAG4	HSPA9	0.931
NUP35	HSPA9	0.902
CCR7	ADCY1	0.9
MCHR1	ADCY1	0.908
PRKAR2A	ADCY1	0.942
APP	ADCY1	0.911
CXCL5	ADCY1	0.9
ZW10	RAD21	0.913
PPP2CB	RAD21	0.935
NUP107	RAD21	0.913
MSH6	RAD21	0.959
FOSB	RAD21	0.901
CCNB1	RAD21	0.963
DYNC1LI2	RAD21	0.902
PPP2R5A	RAD21	0.905
TAOK1	RAD21	0.904
EP300	RAD21	0.949
CLASP1	RAD21	0.902
HIST1H2BD	RAD21	0.921
SNRPD3	PHAX	0.945
NUP107	PHAX	0.905
ELL2	PHAX	0.9
CDK7	PHAX	0.904
CCNT1	PHAX	0.932
CCNT2	PHAX	0.903
GEMIN7	PHAX	0.946
POLR2D	PHAX	0.902
NUP35	PHAX	0.906
BHLHE41	NFIL3	0.987
SF3A1	PCF11	0.914
SNRPD3	PCF11	0.904
PAPOLA	PCF11	0.978
CSTF1	PCF11	0.978
SF3A2	PCF11	0.903
DDX5	PCF11	0.946
SRSF9	PCF11	0.932
ELL2	PCF11	0.917
SRSF6	PCF11	0.936
SYMPK	PCF11	0.994
LSM8	PCF11	0.913
PPIL4	PCF11	0.914
CDK7	PCF11	0.946
SRSF1	PCF11	0.942
PPWD1	PCF11	0.91
SNW1	PCF11	0.921
CCNT1	PCF11	0.933
CCNT2	PCF11	0.918
CPSF6	PCF11	0.973
PRCC	PCF11	0.903
SF3B4	PCF11	0.905
POLR2D	PCF11	0.9
THOC7	PCF11	0.977
PHAX	PCF11	0.945
RBX1	LRR1	0.948
UBE3A	LRR1	0.903
VHL	LRR1	0.954
UBE2K	LRR1	0.906
RNF138	LRR1	0.905
HERC2	LRR1	0.905
TRIM37	LRR1	0.904
TCEB2	LRR1	0.95
MGRN1	LRR1	0.902
HACE1	LRR1	0.906
FBXW11	LRR1	0.902
COMMD7	LRR1	0.9
UBE2L6	LRR1	0.904
RNF126	LRR1	0.902
GDA	HPRT1	0.953
MAPK1	DUSP16	0.994
PSMA4	SPRED1	0.9
PSMC4	SPRED1	0.9
RBX1	SPRED1	0.9
PSMD7	SPRED1	0.9
PSMA2	SPRED1	0.9
KRAS	SPRED1	0.948
PSMA5	SPRED1	0.9
RASA1	SPRED1	0.958
NOTCH1	HIF1AN	0.905
RBX1	COPS2	0.965
CDK7	COPS2	0.906
VHL	COPS2	0.9
DDB2	COPS2	0.988
TCEB2	COPS2	0.907
FBXW11	COPS2	0.929
POLR2D	COPS2	0.902
COMMD7	COPS2	0.907
LRR1	COPS2	0.968
SORT1	GNPTAB	0.9
SERPIND1	HSP90B1	0.902
TIMP1	HSP90B1	0.906
RPN2	HSP90B1	0.978
CANX	HSP90B1	0.979
LAMC1	HSP90B1	0.906
ADAM10	HSP90B1	0.91
MGAT4A	HSP90B1	0.9
VCAN	HSP90B1	0.906
STC2	HSP90B1	0.908
IGFBP4	HSP90B1	0.9
PRSS23	HSP90B1	0.9
APP	HSP90B1	0.931
FSTL1	HSP90B1	0.91
HSPA9	HSP90B1	0.92
COL1A1	PPIB	0.952
DLGAP5	KIAA0101	0.933
RPA1	KIAA0101	0.902
CCNB1	KIAA0101	0.911
NBN	TERF2IP	0.994
HIST1H2BD	TERF2IP	0.9
RAD21	TERF2IP	0.903
PSMA4	PLK1	0.94
PSMC4	PLK1	0.913
ZW10	PLK1	0.941
PSMD7	PLK1	0.908
PPP2CB	PLK1	0.947
PSMA2	PLK1	0.938
NUP107	PLK1	0.928
FBXO5	PLK1	0.997
GORASP2	PLK1	0.943
CDC25B	PLK1	0.978
DLGAP5	PLK1	0.97
CCNB1	PLK1	0.999
DYNC1LI2	PLK1	0.902
PPP2R5A	PLK1	0.929
TAOK1	PLK1	0.912
TUBGCP3	PLK1	0.947
AJUBA	PLK1	0.932
EP300	PLK1	0.933
CLASP1	PLK1	0.948
YWHAE	PLK1	0.911
FBXW11	PLK1	0.936
TP53	PLK1	0.922
PSMA5	PLK1	0.934
PAK1	PLK1	0.949
HIST1H2BD	PLK1	0.929
RAD21	PLK1	0.988
MCM6	MAPRE2	0.991
COL1A1	COL6A2	0.989
PPIB	COL6A2	0.907
EFNB2	CRK	0.936
KIDINS220	CRK	0.924
FLT4	CRK	0.932
GAB1	CRK	0.981
PIK3CA	CRK	0.927
CBL	CRK	0.995
IGF1R	CRK	0.98
EGFR	CRK	0.975
NTRK2	CRK	0.93
PAK1	CRK	0.923
DOCK1	CRK	0.997
FLT1	CRK	0.905
BRAF	CRK	0.931
ELMO2	CRK	0.983
ABI2	CRK	0.937
TRIB3	MED1	0.9
NRBP1	MED1	0.902
RORA	MED1	0.936
SNW1	MED1	0.938
EP300	MED1	0.955
PLIN2	MED1	0.902
ZC3H13	MED1	0.993
MED21	MED1	0.987
MED11	MED1	0.989
PPP3R1	NFATC3	0.973
EGR1	NFATC3	0.929
ATP6V1D	ATP5L	0.928
ATP5B	ATP5L	0.998
ATP5G3	ATP5L	0.976
MT2A	TRIM68	0.9
TRIM28	ZNF267	0.915
BCL9	KMT2D	0.919
APC	KMT2D	0.904
THBS1	KMT2D	0.9
AJUBA	KMT2D	0.909
EP300	KMT2D	0.994
EED	KMT2D	0.94
POLR2D	KMT2D	0.916
HIST1H2BD	KMT2D	0.909
TBCB	TUBA1A	0.959
TTL	TUBA1A	0.94
TUBGCP3	TUBA1A	0.945
AJUBA	TUBA1A	0.9
CLASP1	TUBA1A	0.903
YWHAE	TUBA1A	0.951
CCT5	TUBA1A	0.914
PLK1	TUBA1A	0.948
PIK3CA	AXL	0.948
TRIM28	ZNF577	0.903
ZW10	BIRC5	0.9
RBX1	BIRC5	0.917
PPP2CB	BIRC5	0.903
NUP107	BIRC5	0.91
DLGAP5	BIRC5	0.949
CCNB1	BIRC5	0.996
DYNC1LI2	BIRC5	0.9
PPP2R5A	BIRC5	0.916
TAOK1	BIRC5	0.903
CLASP1	BIRC5	0.901
TP53	BIRC5	0.957
RASA1	BIRC5	0.936
NUP35	BIRC5	0.907
RAD21	BIRC5	0.923
KIAA0101	BIRC5	0.911
PLK1	BIRC5	0.991
SF3A1	SRRM2	0.953
SNRPD3	SRRM2	0.992
PAPOLA	SRRM2	0.906
CSTF1	SRRM2	0.9
SF3A2	SRRM2	0.995
DDX5	SRRM2	0.95
SRSF9	SRRM2	0.943
SRSF6	SRRM2	0.943
SYMPK	SRRM2	0.913
LSM8	SRRM2	0.914
PPIL4	SRRM2	0.918
SRSF1	SRRM2	0.956
PPWD1	SRRM2	0.919
SNW1	SRRM2	0.996
PRCC	SRRM2	0.913
SF3B4	SRRM2	0.958
POLR2D	SRRM2	0.904
PCF11	SRRM2	0.914
TP53	PRELID1	0.904
PEMT	MBOAT2	0.961
AGPAT5	MBOAT2	0.923
VCL	MAP2K1	0.934
MAPK1	MAP2K1	0.991
NFKB1	MAP2K1	0.937
PAPD7	MAP2K1	0.904
ZC3HAV1	MAP2K1	0.9
EFNB2	MAP2K1	0.91
YWHAH	MAP2K1	0.906
KRAS	MAP2K1	0.986
GAB1	MAP2K1	0.922
PIK3CA	MAP2K1	0.973
YWHAE	MAP2K1	0.94
PAPSS1	MAP2K1	0.906
ERBB3	MAP2K1	0.937
IQGAP1	MAP2K1	0.947
ERBB2	MAP2K1	0.943
PAK1	MAP2K1	0.959
BRAF	MAP2K1	0.999
ARAF	MAP2K1	0.988
MAPK1	IGF1	0.962
TIMP1	IGF1	0.953
MMP2	IGF1	0.96
HBEGF	IGF1	0.95
SPARC	IGF1	0.941
YWHAH	IGF1	0.907
THBS1	IGF1	0.943
CDH1	IGF1	0.971
PIK3CA	IGF1	0.947
FGF2	IGF1	0.922
IGF1R	IGF1	0.999
IGFBP4	IGF1	0.999
NTRK2	IGF1	0.907
OLA1	IGF1	0.9
APP	IGF1	0.95
CRK	IGF1	0.956
CNOT2	PAIP1	0.913
RQCD1	PAIP1	0.907
EIF4A1	PAIP1	0.996
GRN	TRAPPC1	0.903
MAPK1	TRAPPC1	0.901
CNIH1	TRAPPC1	0.902
YKT6	TRAPPC1	0.963
LMAN1	TRAPPC1	0.906
ACLY	TRAPPC1	0.9
GNS	TRAPPC1	0.9
SDCBP	TRAPPC1	0.9
SEC22C	TRAPPC1	0.937
TRAPPC10	TRAPPC1	0.998
GRN	PA2G4	0.9
MAPK1	PA2G4	0.905
ACLY	PA2G4	0.905
GNS	PA2G4	0.9
SDCBP	PA2G4	0.9
NIFK	PA2G4	0.949
TRAPPC1	PA2G4	0.901
KDELR2	ARAP2	0.902
RHOB	ARAP2	0.915
SORT1	SH3D19	0.9
VAMP8	SH3D19	0.9
PIK3C2A	SH3D19	0.9
FKBP4	HSPA4	0.903
NUP107	HSPA4	0.916
DNAJB1	HSPA4	0.999
DNAJB6	HSPA4	0.974
BAG4	HSPA4	0.969
NUP35	HSPA4	0.903
HSPA9	HSPA4	0.986
HSP90B1	HSPA4	0.902
ZW10	TMED10	0.907
CNIH1	TMED10	0.956
YKT6	TMED10	0.911
LMAN1	TMED10	0.97
ARF3	TMED10	0.917
DYNC1LI2	TMED10	0.9
KDELR2	TMED10	0.96
KIF1B	TMED10	0.902
ARCN1	TMED10	0.945
SEC22C	TMED10	0.936
TRAPPC10	TMED10	0.9
TRAPPC1	TMED10	0.903
ZW10	PDS5A	0.905
PPP2CB	PDS5A	0.905
NUP107	PDS5A	0.918
CCNB1	PDS5A	0.922
DYNC1LI2	PDS5A	0.9
PPP2R5A	PDS5A	0.909
TAOK1	PDS5A	0.91
CLASP1	PDS5A	0.906
RAD21	PDS5A	0.999
PLK1	PDS5A	0.969
BIRC5	PDS5A	0.922
NFKB1	NKIRAS2	0.92
MAP1B	LRP8	0.916
TIMP1	GTPBP2	0.9
SPARC	GTPBP2	0.9
THBS1	GTPBP2	0.907
OLA1	GTPBP2	0.9
APP	GTPBP2	0.904
IGF1	GTPBP2	0.9
DERL2	RNF139	0.97
TP53	HIPK3	0.908
RAB21	ANKRD27	0.983
AGO2	POP7	0.9
TARBP2	POP7	0.907
RPP25L	POP7	0.921
COL1A1	COL3A1	0.994
PPIB	COL3A1	0.907
COL6A2	COL3A1	0.969
ACLY	FASN	0.994
AASDHPPT	FASN	0.99
NAA50	FAM134B	0.902
MAPK1	IRS1	0.974
KRAS	IRS1	0.955
PIK3CA	IRS1	0.98
CBL	IRS1	0.961
IGF1R	IRS1	0.997
CRK	IRS1	0.979
IGF1	IRS1	0.992
TRIM28	ZNF439	0.918
YKT6	COG7	0.938
VAMP4	COG7	0.936
DYNC1LI2	COG7	0.9
KDELR2	COG7	0.905
ARL1	COG7	0.905
ARCN1	COG7	0.918
RAB6B	COG7	0.9
TMED10	COG7	0.901
YKT6	COG8	0.948
VAMP4	COG8	0.949
DYNC1LI2	COG8	0.9
KDELR2	COG8	0.906
ARL1	COG8	0.919
ARCN1	COG8	0.914
RAB6B	COG8	0.922
TMED10	COG8	0.9
COG7	COG8	0.999
SF3A1	PCBP1	0.923
SNRPD3	PCBP1	0.962
PAPOLA	PCBP1	0.907
CSTF1	PCBP1	0.91
SF3A2	PCBP1	0.977
DDX5	PCBP1	0.954
SRSF9	PCBP1	0.938
SRSF6	PCBP1	0.927
SYMPK	PCBP1	0.906
LSM8	PCBP1	0.924
PPIL4	PCBP1	0.902
SRSF1	PCBP1	0.98
PPWD1	PCBP1	0.915
SNW1	PCBP1	0.908
PRCC	PCBP1	0.903
SF3B4	PCBP1	0.907
POLR2D	PCBP1	0.904
PCF11	PCBP1	0.912
SRRM2	PCBP1	0.911
FUT9	B3GNT2	0.917
VCAN	CHST11	0.96
YWHAH	CSNK1G1	0.909
LRP6	CSNK1G1	0.95
YWHAE	CSNK1G1	0.909
TP53	CSNK1G1	0.902
YKT6	ARF4	0.93
PKD2	ARF4	0.966
ARF3	ARF4	0.904
DYNC1LI2	ARF4	0.9
KDELR2	ARF4	0.95
KIF1B	ARF4	0.911
ARCN1	ARF4	0.946
EGFR	ARF4	0.972
TMED10	ARF4	0.931
MAPK1	PRKCE	0.959
KRAS	PRKCE	0.933
PRKAR2A	PRKCE	0.908
BRAF	PRKCE	0.949
ADCY1	PRKCE	0.905
CRK	PRKCE	0.901
MAPK1	FOS	0.992
CCL2	FOS	0.97
CCND1	FOS	0.967
NR3C1	FOS	0.972
EGR1	FOS	0.996
FOSB	FOS	0.983
KDM6B	FOS	0.918
EP300	FOS	0.97
ATF2	FOS	0.986
TP53	FOS	0.969
EGFR	FOS	0.9
NOTCH1	FOS	0.948
HIST1H2BD	FOS	0.901
BTG2	FOS	0.923
NFATC3	FOS	0.958
PPP3R1	ITPR1	0.933
CBL	ITPR1	0.903
PRKAR2A	ITPR1	0.918
IQGAP1	ITPR1	0.91
MAPK1	YWHAG	0.936
CDKN1B	YWHAG	0.938
LNPEP	YWHAG	0.911
PPP3R1	YWHAG	0.923
CDC25B	YWHAG	0.972
YWHAH	YWHAG	0.997
KRAS	YWHAG	0.93
CCNB1	YWHAG	0.924
TUBGCP3	YWHAG	0.902
AJUBA	YWHAG	0.9
CLASP1	YWHAG	0.905
YWHAE	YWHAG	0.992
HDAC4	YWHAG	0.976
TP53	YWHAG	0.95
BRAF	YWHAG	0.954
PLK1	YWHAG	0.907
TUBA1A	YWHAG	0.927
MAP2K1	YWHAG	0.913
CSNK1G1	YWHAG	0.909
CHMP2B	GABARAP	0.913
ATG3	GABARAP	0.995
WIPI2	GABARAP	0.984
CNIH1	SEC23A	0.949
YKT6	SEC23A	0.956
CANX	SEC23A	0.951
LMAN1	SEC23A	0.975
ARCN1	SEC23A	0.911
SEC22C	SEC23A	0.975
PDCD6	SEC23A	0.936
SCAP	SEC23A	0.918
TRAPPC10	SEC23A	0.933
TRAPPC1	SEC23A	0.946
TMED10	SEC23A	0.956
GRN	GLB1	0.918
MAPK1	GLB1	0.904
ACLY	GLB1	0.901
GNS	GLB1	0.922
SDCBP	GLB1	0.9
TRAPPC1	GLB1	0.967
PA2G4	GLB1	0.9
ZW10	KIF5B	0.92
ARF3	KIF5B	0.928
DYNC1LI2	KIF5B	0.937
KDELR2	KIF5B	0.914
KIF1B	KIF5B	0.924
ARCN1	KIF5B	0.905
RAB7A	KIF5B	0.931
TUBA1A	KIF5B	0.935
TMED10	KIF5B	0.907
ARF4	KIF5B	0.918
ACO2	PDHB	0.948
OGDH	PDHB	0.992
PDHX	PDHB	0.999
DLAT	PDHB	0.999
PDPR	PDHB	0.932
GMNN	MCM7	0.984
RPA1	MCM7	0.998
NASP	MCM7	0.938
CCNB1	MCM7	0.921
MCM4	MCM7	0.999
ASF1B	MCM7	0.957
MCM6	MCM7	0.999
POLA2	MCM7	0.996
SSRP1	MCM7	0.927
PLK1	MCM7	0.96
RBX1	FEM1B	0.943
VHL	FEM1B	0.913
TCEB2	FEM1B	0.952
FBXW11	FEM1B	0.908
COMMD7	FEM1B	0.901
LRR1	FEM1B	0.944
COPS2	FEM1B	0.964
YWHAH	DDIT4	0.9
YWHAE	DDIT4	0.901
TP53	DDIT4	0.968
YWHAG	DDIT4	0.9
AIMP2	QARS	0.997
AARS	QARS	0.983
SF3A1	U2AF2	0.98
SNRPD3	U2AF2	0.985
PAPOLA	U2AF2	0.911
CSTF1	U2AF2	0.949
SF3A2	U2AF2	0.998
DDX5	U2AF2	0.952
NUP107	U2AF2	0.913
SRSF9	U2AF2	0.972
SRSF6	U2AF2	0.986
SYMPK	U2AF2	0.943
LSM8	U2AF2	0.928
PPIL4	U2AF2	0.909
SRSF1	U2AF2	0.997
PPWD1	U2AF2	0.913
SNW1	U2AF2	0.98
PRCC	U2AF2	0.908
SF3B4	U2AF2	0.954
POLR2D	U2AF2	0.903
U2AFBP	U2AF2	0.999
NUP35	U2AF2	0.908
THOC7	U2AF2	0.937
PCF11	U2AF2	0.95
SRRM2	U2AF2	0.964
PCBP1	U2AF2	0.971
RPS3	EEF2	0.999
EIF4A1	EEF2	0.975
RPS23	EEF2	0.999
SMAD7	RGMB	0.92
SIRT1	H2AFV	0.95
AGO2	H2AFV	0.924
CCND1	H2AFV	0.907
BCL9	H2AFV	0.932
FOSB	H2AFV	0.901
KDM6B	H2AFV	0.95
CCNB1	H2AFV	0.943
CDK4	H2AFV	0.928
THBS1	H2AFV	0.9
AJUBA	H2AFV	0.902
EP300	H2AFV	0.95
EED	H2AFV	0.959
TAF1B	H2AFV	0.9
ATF2	H2AFV	0.9
ARID4B	H2AFV	0.936
NBN	H2AFV	0.939
POLR2D	H2AFV	0.909
MTA2	H2AFV	0.907
SMARCA5	H2AFV	0.953
HIST1H2BD	H2AFV	0.958
RAD21	H2AFV	0.935
TERF2IP	H2AFV	0.9
PLK1	H2AFV	0.934
KMT2D	H2AFV	0.929
FOS	H2AFV	0.902
MRPL28	MRPL48	0.984
SIRT1	CLOCK	0.99
BHLHE41	CLOCK	0.994
BHLHE40	CLOCK	0.959
RORA	CLOCK	0.966
EP300	CLOCK	0.974
CCRN4L	CLOCK	0.979
EGR1	CBX2	0.901
KDM6B	CBX2	0.939
RCOR1	CBX2	0.928
EED	CBX2	0.96
ATF2	CBX2	0.9
TP53	CBX2	0.918
MTA2	CBX2	0.906
HIST1H2BD	CBX2	0.9
H2AFV	CBX2	0.922
CCR7	CCL19	0.996
MCHR1	CCL19	0.9
APP	CCL19	0.905
CXCL5	CCL19	0.956
ADCY1	CCL19	0.9
BTG2	HOXB9	0.975
ACLY	ACO1	0.958
TAF4	HCFC1	0.911
KANSL1	HCFC1	0.925
PPRC1	HCFC1	0.916
EIF5	RPL38	0.916
RPN2	RPL38	0.902
SEC61A1	RPL38	0.996
TRAM1	RPL38	0.901
SMG9	RPL38	0.903
RPS3	RPL38	0.999
EIF4A1	RPL38	0.937
RPS23	RPL38	0.999
EEF2	RPL38	0.998
MED1	NR1D2	0.905
TAOK1	TAOK2	0.902
KCNH2	ALG10B	0.965
SCLY	ISCU	0.966
RBX1	FBXO31	0.944
UBE3A	FBXO31	0.9
VHL	FBXO31	0.9
UBE2K	FBXO31	0.9
RNF138	FBXO31	0.9
HERC2	FBXO31	0.9
TRIM37	FBXO31	0.9
TCEB2	FBXO31	0.901
MGRN1	FBXO31	0.902
HACE1	FBXO31	0.9
FBXW11	FBXO31	0.905
COMMD7	FBXO31	0.9
UBE2L6	FBXO31	0.9
RNF126	FBXO31	0.9
LRR1	FBXO31	0.9
COPS2	FBXO31	0.9
FEM1B	FBXO31	0.911
GNPTAB	NAGPA	0.904
PSMA4	PPP2R1B	0.916
PSMC4	PPP2R1B	0.905
[truncated: 13,635 more rows]
