# Supplementary material for: Integrating microRNA expression, miRNA-mRNA regulation network and signal pathway: a novel strategy for lung cancer biomarker discovery
Source: PeerJ. 2021 Oct 25;9:e12369. doi: 10.7717/peerj.12369 (PMC8552790; doi:10.7717/peerj.12369)
Supplement: Supplemental Information 4 — Yellow cell indicate gene that is independently regulated by a miRNA in the miRNA-mRNA network. MCC, maximal clique centrality; DMNC, the density of maximum neighborhood component; MNC, maximum neighborhood component; EPC, edge percolated component. [file peerj-09-12369-s004.xlsx]

## Sheet: hubba
miRNA	Gene name	MCC	DMNC	MNC	Degree	EPC	Closeness	Radiality	Betweenness	Stress
hsa-miR-183-5p	BTRC	92200000000000	0.85983	96	97	351.141	673.969	12.4915	23917.3	637000
hsa-miR-96-5p	TCEB2	92200000000000	0.90141	92	92	359.208	654.692	12.4167	18326.8	544688
hsa-miR-96-5p	RNPS1	92200000000000	0.89049	90	90	349.006	647.662	12.3757	18621.9	874730
hsa-miR-210-3p	ATG7	92200000000000	1.64286	56	83	342.735	661.574	12.4776	41903.1	621422
hsa-miR-708-5p	GTF2F2	92200000000000	0.8902	83	83	338.702	644.781	12.3735	9371.14	337200
hsa-miR-183-5p	RBM8A	92200000000000	0.86578	82	82	336.409	642.162	12.3652	12678.3	736530
hsa-miR-210-3p	UBE2N	92200000000000	0.96689	80	82	341.97	644.085	12.3857	15541.2	284018
hsa-miR-96-5p	SNW1	92200000000000	0.88486	80	81	343.502	677.607	12.5391	29883.3	702454
hsa-miR-210-3p	VHL	92200000000000	1.08441	80	80	347.599	646.067	12.4073	10273.5	298194
hsa-miR-183-5p	CDC27	92200000000000	1.08395	77	78	346.701	646.345	12.3962	10780	361250
hsa-miR-210-3p	ANAPC7	92200000000000	1.11472	75	76	333.94	645.045	12.3973	7776.53	266202
hsa-miR-96-5p	FBXW11	92200000000000	1.10704	76	76	335.489	648.841	12.43	13741.9	256874
hsa-miR-210-3p	UBE2D3	92200000000000	1.15588	71	76	339.858	635.683	12.368	25974.1	490902
hsa-miR-708-5p;hsa-miR-183-5p	ANAPC2	92200000000000	1.12316	75	75	348.746	636.312	12.358	5254.16	224954
hsa-miR-183-5p	NHP2L1	92200000000000	0.99202	75	75	335.905	630.714	12.3242	18441.3	544210
hsa-miR-1-3p	UBE2L6	92200000000000	1.12595	71	72	337.812	619.269	12.2827	17215.2	341512
hsa-miR-96-5p	PCF11	92200000000000	1.08248	71	71	330.982	616.214	12.2639	3697.46	144884
hsa-miR-96-5p	WWP1	92200000000000	1.29057	67	71	340.326	621.57	12.2982	9391.8	218710
hsa-miR-96-5p;hsa-miR-1-3p	RNF111	92200000000000	1.21936	68	68	336.207	622.57	12.2982	5091.24	114116
hsa-miR-183-5p	SNRPD3	92200000000000	1.15417	68	68	334.312	613.964	12.2517	5709.01	198164
hsa-miR-1-3p	SRSF1	92200000000000	1.23945	67	68	328.819	612.197	12.2434	5169.51	186552
hsa-miR-1-3p	PTBP1	92200000000000	1.11047	67	67	324.956	616.031	12.2755	12684	369418
hsa-miR-183-5p	SRSF11	92200000000000	1.22608	67	67	327.197	611.447	12.2423	8088.69	232244
hsa-miR-1-3p	SF3B1	92200000000000	1.16908	66	66	327.832	646.307	12.4256	7410.57	260104
hsa-miR-708-5p	SYMPK	92200000000000	1.25447	65	66	333.91	610.531	12.2401	6159.24	212626
hsa-miR-1-3p	HERC2	92200000000000	1.3116	65	65	337.703	612.337	12.2556	5212.59	102256
hsa-miR-183-5p;hsa-miR-708-5p	HNRNPK	92200000000000	1.22949	63	63	317.987	618.181	12.2988	9339.06	286216
hsa-miR-96-5p;hsa-miR-1-3p	DHX15	92200000000000	1.2702	61	62	321.088	599.681	12.1902	12169.2	245638
hsa-miR-1-3p;hsa-miR-96-5p	HNRNPH1	92200000000000	1.29695	61	62	328.573	606.181	12.2378	13111.1	377472
hsa-miR-183-5p	ELAVL1	92200000000000	1.3677	59	60	327.397	621.781	12.3253	5954.74	188408
hsa-miR-183-5p	HNRNPA1	92200000000000	1.33202	60	60	324.932	605.014	12.2362	4615.06	166796
hsa-miR-210-3p	RPS3	92200000000000	0.73811	60	60	245.36	610.5	12.2606	8945.98	516316
hsa-miR-96-5p	UBE3A	92200000000000	1.50632	59	60	333.027	619.858	12.3071	7973.24	93856
hsa-miR-96-5p;hsa-miR-210-3p;hsa-miR-1-3p	DDX5	92200000000000	1.34036	59	59	325.715	646.183	12.4344	10148.4	176406
hsa-miR-96-5p	FAU	92200000000000	0.76396	57	57	232.886	603.55	12.2301	18523.3	589878
hsa-miR-96-5p	RPL5	92200000000000	0.73187	57	57	242.697	617.805	12.3231	22521.8	621772
hsa-miR-96-5p	RPS24	92200000000000	0.78943	56	56	237.641	600.633	12.2207	5269.86	320526
hsa-miR-708-5p;hsa-miR-210-3p	RPS20	92200000000000	0.80298	55	55	230.61	599.502	12.2118	5766.94	400038
hsa-miR-708-5p	SF3A2	92200000000000	1.53542	54	55	310.782	596.693	12.1996	5151.15	104574
hsa-miR-96-5p;hsa-miR-183-5p	TMED10	92200000000000	0.74563	49	51	207.008	595.131	12.2439	5521.12	152306
hsa-miR-1-3p;hsa-miR-183-5p	KIF2A	92200000000000	0.84603	49	49	251.237	628.138	12.3962	5706.11	324294
hsa-miR-708-5p	CLASP1	92200000000000	0.89373	44	47	250.175	627.471	12.394	6821.97	139630
hsa-miR-96-5p	CTTN	92200000000000	0.74522	46	46	212.995	652.031	12.497	12457.5	215624
hsa-miR-96-5p;hsa-miR-210-3p	TFRC	92200000000000	0.82464	45	45	186.864	625.631	12.3873	17971.2	239532
hsa-miR-96-5p	PABPC1	92200000000000	0.83545	40	44	223.317	613.685	12.3115	12219.7	378218
hsa-miR-183-5p	RAB5B	92200000000000	0.80374	42	44	184.469	614.064	12.3353	17433	232772
hsa-miR-1-3p;hsa-miR-96-5p	WASL	92200000000000	0.74906	44	44	203.395	645.731	12.4776	6371.23	129430
hsa-miR-1-3p	VAMP4	92200000000000	0.84028	42	42	197.469	617.848	12.3514	5924.59	135666
hsa-miR-183-5p;hsa-miR-708-5p	GNB2L1	92200000000000	0.96601	27	41	195.837	620.908	12.3663	31718.5	790294
hsa-miR-96-5p;hsa-miR-210-3p	ZW10	92200000000000	0.88085	41	41	233.244	610.038	12.3181	4616.55	241460
hsa-miR-1-3p;hsa-miR-96-5p	ARPC3	92200000000000	0.85246	40	40	192.92	641.814	12.4688	6677.93	157258
hsa-miR-183-5p	ARPC4	92200000000000	0.85246	40	40	194.053	641.814	12.4688	6677.93	157258
hsa-miR-96-5p;hsa-miR-1-3p	BUB3	92200000000000	0.94323	39	40	248.477	616.838	12.3469	4848.28	226384
hsa-miR-1-3p;hsa-miR-96-5p	CLTC	92200000000000	0.84259	39	40	195.102	629.098	12.4084	7538.16	116344
hsa-miR-183-5p	USO1	92200000000000	0.75417	40	40	170.687	599.864	12.2921	4808.21	183200
hsa-miR-96-5p	VAMP3	92200000000000	0.88798	39	39	186.771	621.814	12.3746	3891.72	90962
hsa-miR-1-3p	RAD21	92200000000000	0.83939	38	38	238.294	634.038	12.4322	4441.92	232996
hsa-miR-183-5p	COPS2	92200000000000	0.80263	36	37	252.613	597.919	12.2473	4131.25	98446
hsa-miR-708-5p	FTL	92200000000000	0.73254	36	36	170.575	631.287	12.4488	8151.39	95396
hsa-miR-183-5p;hsa-miR-96-5p	KIF5B	92200000000000	0.78379	33	33	181.439	607.855	12.2927	4518.39	101254
hsa-miR-708-5p	TOLLIP	92200000000000	0.74449	29	30	129.508	622.704	12.4261	7157.27	86188
