# Supplementary material for: Integrating microRNA expression, miRNA-mRNA regulation network and signal pathway: a novel strategy for lung cancer biomarker discovery
Source: PeerJ. 2021 Oct 25;9:e12369. doi: 10.7717/peerj.12369 (PMC8552790; doi:10.7717/peerj.12369)
Supplement: Supplemental Information 5 [file peerj-09-12369-s005.xlsx]

## Sheet: TCGA datset
sample	hsa-miR-708-5p
TCGA.22.4609.11A.01H.2124.13	2.48806
TCGA.22.5472.11A.11H.2124.13	3.00092
TCGA.22.5478.11A.11H.2124.13	2.42432
TCGA.22.5483.11A.11H.2124.13	3.37757
TCGA.33.4587.11A.01H.2124.13	2.37796
TCGA.33.6737.11A.01H.2124.13	2.44385
TCGA.34.7107.11A.01H.2124.13	2.89273
TCGA.34.8454.11A.01H.2325.13	2.44943
TCGA.34.8456.11A.01H.2325.13	2.74794
TCGA.39.5040.11A.01H.2124.13	2.54194
TCGA.43.5670.11A.01H.2124.13	2.75831
TCGA.43.6143.11A.01H.2124.13	3.41837
TCGA.43.6771.11A.01H.2124.13	2.93072
TCGA.43.6773.11A.01H.2124.13	2.53644
TCGA.43.7657.11A.01H.2124.13	3.02024
TCGA.43.7658.11A.01H.2124.13	2.70352
TCGA.44.2655.11A.01R.1757.13	3.24371
TCGA.44.2657.11A.01R.1757.13	2.34166
TCGA.44.2661.11A.01R.1757.13	3.15642
TCGA.44.2665.11A.01R.1757.13	2.10933
TCGA.44.2668.11A.01R.1757.13	3.27311
TCGA.44.3396.11A.01R.1757.13	2.02626
TCGA.44.6144.11A.01H.2169.13	2.20594
TCGA.44.6776.11A.01H.2169.13	3.14238
TCGA.44.6777.11A.01H.2169.13	3.69882
TCGA.44.6778.11A.01H.2169.13	2.10008
TCGA.44.7659.11A.01H.2065.13	2.03854
TCGA.44.7660.11A.01H.2065.13	2.48459
TCGA.44.7661.11A.01H.2065.13	1.6821
TCGA.44.7662.11A.01H.2065.13	2.29115
TCGA.44.7667.11A.01H.2065.13	2.3278
TCGA.44.7669.11A.01H.2065.13	2.80993
TCGA.44.7670.11A.01H.2065.13	2.97335
TCGA.44.7671.11A.01H.2065.13	2.24162
TCGA.44.7672.11A.01H.2065.13	1.95665
TCGA.49.6742.11A.01H.2169.13	1.96591
TCGA.49.6743.11A.01H.2169.13	2.57596
TCGA.49.6744.11A.01H.2169.13	3.3093
TCGA.49.6745.11A.01H.2169.13	2.51438
TCGA.50.5930.11A.01H.2169.13	2.52527
TCGA.50.5932.11A.01H.2169.13	1.85836
TCGA.50.5933.11A.01H.2169.13	3.08737
TCGA.50.7109.11A.01H.2038.13	2.9593
TCGA.55.7283.11A.01H.2038.13	2.78053
TCGA.55.7570.11A.01H.2038.13	3.29947
TCGA.55.7574.11A.01H.2038.13	2.10488
TCGA.55.7576.11A.01H.2065.13	2.82082
TCGA.55.7724.11A.01H.2169.13	1.91078
TCGA.55.7725.11A.01H.2169.13	2.54803
TCGA.55.7726.11A.01H.2169.13	2.00887
TCGA.55.7903.11A.01H.2169.13	3.1488
TCGA.55.7910.11A.01H.2169.13	1.99366
TCGA.55.7911.11A.01H.2169.13	2.77451
TCGA.55.7914.11A.01H.2169.13	2.13399
TCGA.56.7222.11A.01H.2044.13	2.0776
TCGA.56.7579.11A.01H.2044.13	2.75645
TCGA.56.7580.11A.01H.2044.13	2.92004
TCGA.56.7582.11A.01H.2044.13	3.44994
TCGA.56.7730.11A.01H.2124.13	3.18709
TCGA.56.7731.11A.01H.2124.13	2.73328
TCGA.56.7823.11A.01H.2246.13	2.84005
TCGA.56.8082.11A.01H.2246.13	2.57244
TCGA.56.8083.11A.01H.2246.13	2.26744
TCGA.56.8201.11A.01H.2246.13	1.91793
TCGA.56.8309.11A.01H.2295.13	2.72367
TCGA.56.8504.11A.01H.2402.13	2.18368
TCGA.56.8623.11A.01H.2402.13	2.67458
TCGA.56.8624.11A.01H.2402.13	2.72283
TCGA.56.8629.11A.01H.2402.13	3.0022
TCGA.58.8386.11A.01H.2295.13	1.98276
TCGA.58.8393.11A.01H.2325.13	3.35163
TCGA.77.7138.11A.01H.2044.13	3.20612
TCGA.77.7142.11A.01H.2044.13	3.09539
TCGA.77.7337.11A.01H.2044.13	3.16297
TCGA.77.7338.11A.01H.2044.13	2.80727
TCGA.77.8007.11A.01H.2186.13	2.11137
TCGA.77.8008.11A.01H.2186.13	3.23235
TCGA.77.8153.11A.01H.2402.13	2.99138
TCGA.78.7163.11A.01H.2065.13	2.96491
TCGA.78.7540.11A.01H.2065.13	2.28622
TCGA.85.7710.11A.01H.2124.13	2.68809
TCGA.86.7711.11A.01H.2065.13	2.70722
TCGA.86.7713.11A.01H.2065.13	2.59894
TCGA.90.6837.11A.01H.2124.13	3.30762
TCGA.90.7767.11A.01H.2124.13	2.75013
TCGA.91.6835.11A.01H.2169.13	2.60856
TCGA.91.6836.11A.01H.2169.13	2.93575
TCGA.92.7340.11A.01H.2044.13	1.9752
TCGA.92.7341.11A.01H.2044.13	2.28118
TCGA.93.7348.11A.01H.2038.13	2.93965
TCGA.22.4609.01A.21H.2124.13	3.80282
TCGA.22.5472.01A.01T.1634.13	3.56609
TCGA.22.5478.01A.01T.1634.13	5.12184
TCGA.22.5483.01A.01T.1819.13	3.1057
TCGA.33.4587.01A.11H.2124.13	3.56615
TCGA.33.6737.01A.11H.1819.13	3.567
TCGA.34.7107.01A.11H.1948.13	3.72511
TCGA.34.8454.01A.11H.2325.13	3.20272
TCGA.34.8456.01A.21H.2325.13	4.25297
TCGA.39.5040.01A.21H.2124.13	3.29345
TCGA.43.5670.01A.21H.2124.13	4.40435
TCGA.43.6143.01A.11H.1819.13	3.35809
TCGA.43.6771.01A.11H.1819.13	3.93566
TCGA.43.6773.01A.41H.1948.13	4.57353
TCGA.43.7657.01A.31H.2124.13	4.94392
TCGA.43.7658.01A.11H.2124.13	2.98681
TCGA.44.2655.01A.01T.0947.13	3.26085
TCGA.44.2657.01A.01T.1108.13	3.39604
TCGA.44.2661.01A.01T.1108.13	3.35119
TCGA.44.2665.01A.01T.0947.13	1.94407
TCGA.44.2668.01A.01T.0947.13	4.11097
TCGA.44.3396.01A.01T.1207.13	3.21221
TCGA.44.6144.01A.11H.1754.13	4.1797
TCGA.44.6776.01A.11H.1857.13	3.26127
TCGA.44.6777.01A.11H.1857.13	3.54867
TCGA.44.6778.01A.11H.1857.13	2.38322
TCGA.44.7659.01A.11H.2065.13	2.55774
TCGA.44.7660.01A.11H.2065.13	2.74013
TCGA.44.7661.01A.11H.2065.13	2.58455
TCGA.44.7662.01A.11H.2065.13	2.87746
TCGA.44.7667.01A.31H.2065.13	3.51818
TCGA.44.7669.01A.21H.2065.13	2.92785
TCGA.44.7670.01A.11H.2065.13	3.87369
TCGA.44.7671.01A.11H.2065.13	2.84613
TCGA.44.7672.01A.11H.2065.13	3.99665
TCGA.49.6742.01A.11H.1857.13	2.68225
TCGA.49.6743.01A.11H.1857.13	3.76157
TCGA.49.6744.01A.11H.1857.13	2.65115
TCGA.49.6745.01A.11H.1857.13	3.47228
TCGA.50.5930.01A.11H.1754.13	4.27668
TCGA.50.5932.01A.11H.1754.13	2.64963
TCGA.50.5933.01A.11H.1754.13	3.17932
TCGA.50.7109.01A.11H.2038.13	2.79314
TCGA.55.7283.01A.11H.2038.13	2.5831
TCGA.55.7570.01A.11H.2038.13	3.86453
TCGA.55.7574.01A.11H.2038.13	2.45309
TCGA.55.7576.01A.11H.2065.13	2.76065
TCGA.55.7724.01A.11H.2169.13	3.68487
TCGA.55.7725.01A.11H.2169.13	2.63691
TCGA.55.7726.01A.11H.2169.13	3.5582
TCGA.55.7903.01A.11H.2169.13	3.80631
TCGA.55.7910.01A.11H.2169.13	3.24979
TCGA.55.7911.01A.11H.2169.13	2.74317
TCGA.55.7914.01A.11H.2169.13	2.41241
TCGA.56.7222.01A.11H.2044.13	4.55856
TCGA.56.7579.01A.11H.2044.13	4.95094
TCGA.56.7580.01A.11H.2044.13	4.24596
TCGA.56.7582.01A.11H.2044.13	4.01586
TCGA.56.7730.01A.11H.2124.13	4.25028
TCGA.56.7731.01A.11H.2124.13	3.99991
TCGA.56.7823.01B.11H.2246.13	5.47377
TCGA.56.8082.01A.11H.2246.13	3.6126
TCGA.56.8083.01A.11H.2246.13	3.73133
TCGA.56.8201.01A.11H.2246.13	3.80763
TCGA.56.8309.01A.11H.2295.13	3.85112
TCGA.56.8504.01A.11H.2402.13	4.29901
TCGA.56.8623.01A.11H.2402.13	2.84695
TCGA.56.8624.01A.11H.2402.13	3.56636
TCGA.56.8629.01A.11H.2402.13	3.0444
TCGA.58.8386.01A.11H.2295.13	3.59644
TCGA.58.8393.01A.11H.2325.13	3.84717
TCGA.77.7138.01A.41H.2044.13	3.62259
TCGA.77.7142.01A.11H.2044.13	3.52821
TCGA.77.7337.01A.21H.2044.13	3.90324
TCGA.77.7338.01A.11H.2044.13	3.91138
TCGA.77.8007.01A.11H.2186.13	3.98508
TCGA.77.8008.01A.21H.2186.13	4.19568
TCGA.77.8153.01A.11H.2402.13	4.40754
TCGA.78.7163.01A.12H.2065.13	2.44281
TCGA.78.7540.01A.11H.2065.13	4.2863
TCGA.85.7710.01A.11H.2124.13	4.42426
TCGA.86.7711.01A.11H.2065.13	2.95081
TCGA.86.7713.01A.11H.2065.13	3.53711
TCGA.90.6837.01A.11H.1948.13	3.49396
TCGA.90.7767.01A.11H.2124.13	4.62576
TCGA.91.6835.01A.11H.1857.13	2.98673
TCGA.91.6836.01A.21H.1857.13	4.68413
TCGA.92.7340.01A.21H.2044.13	2.49216
TCGA.92.7341.01A.31H.2044.13	4.72523
TCGA.93.7348.01A.21H.2038.13	3.61053
