# Supplementary material for: Integrating microRNA expression, miRNA-mRNA regulation network and signal pathway: a novel strategy for lung cancer biomarker discovery
Source: PeerJ. 2021 Oct 25;9:e12369. doi: 10.7717/peerj.12369 (PMC8552790; doi:10.7717/peerj.12369)
Supplement: Supplemental Information 6 [file peerj-09-12369-s006.xlsx]

## Sheet: TCGA dataset
sample	GTF2F2
TCGA.38.4625.11A.01R.1758.07	10.0977
TCGA.38.4626.11A.01R.1758.07	10.2232
TCGA.38.4627.11A.01R.1758.07	10.1896
TCGA.38.4632.11A.01R.1755.07	10.3561
TCGA.44.2655.11A.01R.1758.07	9.76687
TCGA.44.2657.11A.01R.1758.07	9.89168
TCGA.44.2661.11A.01R.1758.07	9.72338
TCGA.44.2662.11A.01R.1758.07	9.61999
TCGA.44.2665.11A.01R.1758.07	9.76017
TCGA.44.2668.11A.01R.1758.07	9.93911
TCGA.44.3396.11A.01R.1758.07	9.72551
TCGA.44.5645.11A.01R.1628.07	9.85784
TCGA.44.6145.11A.01R.1858.07	10.0599
TCGA.44.6146.11A.01R.1858.07	9.7134
TCGA.44.6147.11A.01R.1858.07	9.83182
TCGA.44.6148.11A.01R.1858.07	9.54067
TCGA.44.6776.11A.01R.1858.07	9.99214
TCGA.44.6777.11A.01R.1858.07	9.88704
TCGA.44.6778.11A.01R.1858.07	9.69481
TCGA.49.4490.11A.01R.1858.07	10.22
TCGA.49.4512.11A.01R.1858.07	10.5517
TCGA.49.6742.11A.01R.1858.07	10.0303
TCGA.49.6743.11A.01R.1858.07	10.0432
TCGA.49.6744.11A.01R.1858.07	9.88661
TCGA.49.6745.11A.01R.1858.07	10.0499
TCGA.49.6761.11A.01R.1949.07	10.0883
TCGA.50.5930.11A.01R.1755.07	10.2645
TCGA.50.5931.11A.01R.1858.07	9.99342
TCGA.50.5932.11A.01R.1755.07	9.83176
TCGA.50.5933.11A.01R.1755.07	9.68236
TCGA.50.5935.11A.01R.1858.07	9.79578
TCGA.50.5936.11A.01R.1628.07	9.80928
TCGA.50.5939.11A.01R.1628.07	9.7033
TCGA.50.6595.11A.01R.1858.07	9.83103
TCGA.55.6968.11A.01R.1949.07	10.0977
TCGA.55.6970.11A.01R.1949.07	9.77736
TCGA.55.6971.11A.01R.1949.07	9.90088
TCGA.55.6972.11A.01R.1949.07	9.48419
TCGA.55.6975.11A.01R.1949.07	9.8119
TCGA.55.6978.11A.01R.1949.07	9.81502
TCGA.55.6979.11A.01R.1949.07	10.1539
TCGA.55.6980.11A.01R.1949.07	9.50647
TCGA.55.6981.11A.01R.1949.07	9.45549
TCGA.55.6982.11A.01R.1949.07	9.72098
TCGA.55.6983.11A.01R.1949.07	10.0951
TCGA.55.6984.11A.01R.1949.07	9.95367
TCGA.55.6985.11A.01R.1949.07	10.0304
TCGA.55.6986.11A.01R.1949.07	10.0262
TCGA.73.4676.11A.01R.1755.07	10.2858
TCGA.91.6828.11A.01R.1858.07	9.83682
TCGA.91.6829.11A.01R.1858.07	10.3482
TCGA.91.6831.11A.02R.1858.07	10.1516
TCGA.91.6835.11A.01R.1858.07	9.78772
TCGA.91.6836.11A.01R.1858.07	10.1216
TCGA.91.6847.11A.01R.1949.07	9.81438
TCGA.91.6849.11A.01R.1949.07	9.61255
TCGA.22.4593.11A.01R.1820.07	10.1632
TCGA.22.4609.11A.01R.2125.07	10.0196
TCGA.22.5471.11A.01R.1635.07	9.89705
TCGA.22.5472.11A.11R.1635.07	10.0384
TCGA.22.5478.11A.11R.1635.07	9.72539
TCGA.22.5481.11A.01R.1949.07	9.92442
TCGA.22.5482.11A.01R.1635.07	9.86446
TCGA.22.5483.11A.11R.1820.07	10.0239
TCGA.22.5489.11A.01R.1635.07	9.81509
TCGA.22.5491.11A.01R.1858.07	9.99897
TCGA.33.4587.11A.01R.2125.07	10.2496
TCGA.33.6737.11A.01R.1820.07	9.9444
TCGA.34.7107.11A.01R.1949.07	9.88471
TCGA.34.8454.11A.01R.2326.07	10.1383
TCGA.39.5040.11A.01R.2125.07	10.1684
TCGA.43.5670.11A.01R.2125.07	9.77612
TCGA.43.6143.11A.01R.1820.07	10.1157
TCGA.43.6647.11A.01R.1820.07	9.71697
TCGA.43.6771.11A.01R.1820.07	9.88374
TCGA.43.6773.11A.01R.1949.07	9.59658
TCGA.43.7657.11A.01R.2125.07	10.1085
TCGA.43.7658.11A.01R.2125.07	10.1629
TCGA.51.4079.11A.01R.1758.07	9.4811
TCGA.51.4081.11A.01R.1758.07	9.81328
TCGA.56.7222.11A.01R.2045.07	10.4968
TCGA.56.7579.11A.01R.2045.07	10.1975
TCGA.56.7580.11A.01R.2045.07	10.1744
TCGA.56.7582.11A.01R.2045.07	9.95918
TCGA.56.7730.11A.01R.2125.07	10.1142
TCGA.56.7731.11A.01R.2125.07	10.3059
TCGA.56.8082.11A.01R.2247.07	9.90062
TCGA.56.8083.11A.01R.2247.07	10.0585
TCGA.56.8201.11A.01R.2247.07	10.0163
TCGA.56.8309.11A.01R.2296.07	9.87687
TCGA.56.8623.11A.01R.A28V.07	9.94251
TCGA.58.8386.11A.01R.2296.07	10.1625
TCGA.60.2709.11A.01R.1820.07	10.0802
TCGA.77.7138.11A.01R.2045.07	9.97316
TCGA.77.7142.11A.01R.2045.07	10.1785
TCGA.77.7335.11A.01R.2045.07	10.5774
TCGA.77.7337.11A.01R.2045.07	10.3105
TCGA.77.7338.11A.01R.2045.07	10.327
TCGA.77.8007.11A.01R.2187.07	10.3456
TCGA.77.8008.11A.01R.2187.07	10.321
TCGA.85.7710.11A.01R.2125.07	10.0019
TCGA.90.6837.11A.01R.1949.07	9.81929
TCGA.90.7767.11A.01R.2125.07	10.0189
TCGA.92.7340.11A.01R.2045.07	9.90321
TCGA.38.4625.01A.01R.1206.07	9.47545
TCGA.38.4626.01A.01R.1206.07	10.1743
TCGA.38.4627.01A.01R.1206.07	10.2048
TCGA.38.4632.01A.01R.1755.07	9.82912
TCGA.44.2655.01A.01R.0946.07	10.3991
TCGA.44.2657.01A.01R.1107.07	9.75762
TCGA.44.2661.01A.01R.1107.07	9.94212
TCGA.44.2662.01A.01R.A278.07	9.40741
TCGA.44.2665.01A.01R.0946.07	10.1031
TCGA.44.2668.01A.01R.A278.07	10.3585
TCGA.44.3396.01A.01R.1206.07	10.3302
TCGA.44.5645.01A.01R.A278.07	9.9679
TCGA.44.6145.01A.11R.1755.07	9.67403
TCGA.44.6146.01A.11R.A278.07	9.72717
TCGA.44.6147.01A.11R.A278.07	9.95703
TCGA.44.6148.01A.11R.1755.07	9.51622
TCGA.44.6776.01A.11R.1858.07	10.5618
TCGA.44.6777.01A.11R.1858.07	9.59112
TCGA.44.6778.01A.11R.1858.07	9.83768
TCGA.49.4490.01A.21R.1858.07	10.2211
TCGA.49.4512.01A.21R.1858.07	9.35794
TCGA.49.6742.01A.11R.1858.07	10.6149
TCGA.49.6743.01A.11R.1858.07	9.96721
TCGA.49.6744.01A.11R.1858.07	10.0871
TCGA.49.6745.01A.11R.1858.07	10.4202
TCGA.49.6761.01A.31R.1949.07	10.8019
TCGA.50.5930.01A.11R.1755.07	10.1668
TCGA.50.5931.01A.11R.1755.07	9.73171
TCGA.50.5932.01A.11R.1755.07	11.0397
TCGA.50.5933.01A.11R.1755.07	10.3857
TCGA.50.5935.01A.11R.1755.07	9.94808
TCGA.50.5936.01A.11R.1628.07	10.2457
TCGA.50.5939.01A.11R.1628.07	9.62263
TCGA.50.6595.01A.12R.1858.07	10.612
TCGA.55.6968.01A.11R.1949.07	9.93285
TCGA.55.6970.01A.11R.1949.07	10.4612
TCGA.55.6971.01A.11R.1949.07	9.60083
TCGA.55.6972.01A.11R.1949.07	10.6379
TCGA.55.6975.01A.11R.1949.07	10.4047
TCGA.55.6978.01A.11R.1949.07	10.1579
TCGA.55.6979.01A.11R.1949.07	9.86062
TCGA.55.6980.01A.11R.1949.07	9.67017
TCGA.55.6981.01A.11R.1949.07	9.54723
TCGA.55.6982.01A.11R.1949.07	9.88826
TCGA.55.6983.01A.11R.1949.07	10.3535
TCGA.55.6984.01A.11R.1949.07	10.4292
TCGA.55.6985.01A.11R.1949.07	9.85358
TCGA.55.6986.01A.11R.1949.07	10.225
TCGA.73.4676.01A.01R.1755.07	10.2751
TCGA.91.6828.01A.11R.1858.07	9.88877
TCGA.91.6829.01A.21R.1858.07	9.63307
TCGA.91.6831.01A.11R.1858.07	10.0173
TCGA.91.6835.01A.11R.1858.07	9.26053
TCGA.91.6836.01A.21R.1858.07	10.1879
TCGA.91.6847.01A.11R.1949.07	10.7602
TCGA.91.6849.01A.11R.1949.07	10.2766
TCGA.22.4593.01A.21R.1820.07	10.4066
TCGA.22.4609.01A.21R.2125.07	10.497
TCGA.22.5471.01A.01R.1635.07	11.1425
TCGA.22.5472.01A.01R.1635.07	9.92117
TCGA.22.5478.01A.01R.1635.07	9.95449
TCGA.22.5481.01A.31R.1949.07	9.53883
TCGA.22.5482.01A.01R.1635.07	10.7608
TCGA.22.5483.01A.01R.1820.07	10.5811
TCGA.22.5489.01A.01R.1635.07	10.2449
TCGA.22.5491.01A.01R.1635.07	10.4221
TCGA.33.4587.01A.11R.2125.07	10.8053
TCGA.33.6737.01A.11R.1820.07	10.8579
TCGA.34.7107.01A.11R.1949.07	9.85191
TCGA.34.8454.01A.11R.2326.07	9.90238
TCGA.39.5040.01A.21R.2125.07	10.2178
TCGA.43.5670.01A.21R.2125.07	11.0733
TCGA.43.6143.01A.11R.1820.07	10.6594
TCGA.43.6647.01A.11R.1820.07	10.0143
TCGA.43.6771.01A.11R.1820.07	11.0317
TCGA.43.6773.01A.41R.1949.07	9.86765
TCGA.43.7657.01A.31R.2125.07	11.6688
TCGA.43.7658.01A.11R.2125.07	9.94789
TCGA.51.4079.01A.01R.1100.07	10.6191
TCGA.51.4081.01A.01R.1100.07	11.2157
TCGA.56.7222.01A.11R.2045.07	10.6035
TCGA.56.7579.01A.11R.2045.07	10.4809
TCGA.56.7580.01A.11R.2045.07	11.6709
TCGA.56.7582.01A.11R.2045.07	10.9872
TCGA.56.7730.01A.11R.2125.07	10.7339
TCGA.56.7731.01A.11R.2125.07	10.5112
TCGA.56.8082.01A.11R.2247.07	10.4399
TCGA.56.8083.01A.11R.2247.07	10.7704
TCGA.56.8201.01A.11R.2247.07	11.0414
TCGA.56.8309.01A.11R.2296.07	10.2533
TCGA.56.8623.01A.11R.A28V.07	10.2298
TCGA.58.8386.01A.11R.2296.07	10.2842
TCGA.60.2709.01A.21R.1820.07	10.2362
TCGA.77.7138.01A.41R.2045.07	10.4659
TCGA.77.7142.01A.11R.2045.07	10.3056
TCGA.77.7335.01A.11R.2045.07	10.3155
TCGA.77.7337.01A.21R.2045.07	10.6051
TCGA.77.7338.01A.11R.2045.07	10.6357
TCGA.77.8007.01A.11R.2187.07	9.95087
TCGA.77.8008.01A.21R.2187.07	10.7998
TCGA.85.7710.01A.11R.2125.07	10.3563
TCGA.90.6837.01A.11R.1949.07	9.87069
TCGA.90.7767.01A.11R.2125.07	11.3395
TCGA.92.7340.01A.21R.2045.07	10.4023
