# Supplementary material for: Integrating microRNA expression, miRNA-mRNA regulation network and signal pathway: a novel strategy for lung cancer biomarker discovery
Source: PeerJ. 2021 Oct 25;9:e12369. doi: 10.7717/peerj.12369 (PMC8552790; doi:10.7717/peerj.12369)
Supplement: Supplemental Information 7 [file peerj-09-12369-s007.xlsx]

## Sheet: GSE56036
sample	hsa-miR-708-5p
tissue: adjacent normal tissue	13.8651
tissue: adjacent normal tissue	11.658
tissue: adjacent normal tissue	16.5888
tissue: adjacent normal tissue	9.47744
tissue: adjacent normal tissue	9.38816
tissue: adjacent normal tissue	9.29196
tissue: adjacent normal tissue	15.8423
tissue: adjacent normal tissue	11.1743
tissue: adjacent normal tissue	24.1448
tissue: adjacent normal tissue	15.4854
tissue: adjacent normal tissue	7.96144
tissue: adjacent normal tissue	8.96533
tissue: adjacent normal tissue	20.5815
tissue: adjacent normal tissue	15.3148
tissue: adjacent normal tissue	12.144
tissue: adjacent normal tissue	13.4479
tissue: adjacent normal tissue	17.6952
tissue: adjacent normal tissue	13.5695
tissue: adjacent normal tissue	15.9003
tissue: adjacent normal tissue	8.78228
tissue: adjacent normal tissue	10.9032
tissue: adjacent normal tissue	9.5934
tissue: adjacent normal tissue	17.778
tissue: adjacent normal tissue	10.6339
tissue: adjacent normal tissue	8.36417
tissue: adjacent normal tissue	13.4479
tissue: adjacent normal tissue	12.7055
tissue: adjacent normal tissue	14.8991
tissue: adjacent normal tissue	20.3865
tissue: primary lung cancer	62.4878
tissue: primary lung cancer	22.9163
tissue: primary lung cancer	10.5675
tissue: primary lung cancer	15.3094
tissue: primary lung cancer	28.5956
tissue: primary lung cancer	54.0903
tissue: primary lung cancer	54.3897
tissue: primary lung cancer	39.2102
tissue: primary lung cancer	30.723
tissue: primary lung cancer	27.6328
tissue: primary lung cancer	127.341
tissue: primary lung cancer	182.774
tissue: primary lung cancer	14.5139
tissue: primary lung cancer	151.111
tissue: primary lung cancer	8.48469
tissue: primary lung cancer	7.57654
tissue: primary lung cancer	41.981
tissue: primary lung cancer	44.7423
tissue: primary lung cancer	30.3409
tissue: primary lung cancer	23.6368
tissue: primary lung cancer	28.7209
tissue: primary lung cancer	72.2071
tissue: primary lung cancer	15.8345
tissue: primary lung cancer	98.5914
tissue: primary lung cancer	50.57
tissue: primary lung cancer	82.7016
tissue: primary lung cancer	12.247
tissue: primary lung cancer	113.851
tissue: primary lung cancer	13.3959
