# Supplementary material for: Integrating microRNA expression, miRNA-mRNA regulation network and signal pathway: a novel strategy for lung cancer biomarker discovery
Source: PeerJ. 2021 Oct 25;9:e12369. doi: 10.7717/peerj.12369 (PMC8552790; doi:10.7717/peerj.12369)
Supplement: Supplemental Information 8 [file peerj-09-12369-s008.xlsx]

## Sheet: GSE36681
sample	hsa-miR-708-5p	log2(expression)
GSM900222	2955.44	11.5292
GSM900223	6536.14	12.6742
GSM900224	1003.05	9.97018
GSM900225	1941.9	10.9233
GSM900226	3178.81	11.6343
GSM900227	6341.48	12.6306
GSM900228	2700.37	11.3989
GSM900229	3533.19	11.7868
GSM900230	2193.4	11.099
GSM900231	743.366	9.53793
GSM900232	435.42	8.76626
GSM900233	654.409	9.35405
GSM900234	1576.6	10.6226
GSM900235	1195.37	10.2232
GSM900236	3049.82	11.5745
GSM900237	1795.3	10.81
GSM900238	602.126	9.23392
GSM900239	8403.44	13.0368
GSM900260	1764.93	10.7854
GSM900261	2602.43	11.3456
GSM900262	6683.55	12.7064
GSM900263	3691.4	11.85
GSM900264	3074.67	11.5862
GSM900265	1930.73	10.9149
GSM900266	3981.45	11.9591
GSM900267	925.558	9.85418
GSM900268	1919.56	10.9066
GSM900269	1966.33	10.9413
GSM900270	2178.64	11.0892
GSM900271	3561.29	11.7982
GSM900272	2426.16	11.2445
GSM900273	2563.86	11.3241
GSM900274	2178.64	11.0892
GSM900298	6611.08	12.6907
GSM900299	5569.53	12.4433
GSM900300	6760.91	12.723
GSM900301	4940.05	12.2703
GSM900302	4442.9	12.1173
GSM900303	5056.02	12.3038
GSM900304	4135.86	12.014
GSM900305	3178.81	11.6343
GSM900306	5213.87	12.3481
GSM900307	3797.86	11.891
GSM900308	3873.88	11.9196
GSM900309	6200.11	12.5981
GSM900310	6072.61	12.5681
GSM900311	8673.43	13.0824
GSM900312	2410.38	11.235
GSM900313	2640.86	11.3668
GSM900314	1897.78	10.8901
GSM900315	4398.73	12.1029
GSM900316	5633.85	12.4599
GSM900317	4217.98	12.0423
GSM900318	2563.86	11.3241
GSM900319	1930.73	10.9149
GSM900320	2000.16	10.9659
GSM900209	2119.33	11.0494
GSM900210	2025.44	10.984
GSM900211	4940.05	12.2703
GSM900212	3348.53	11.7093
GSM900213	3838.22	11.9062
GSM900214	9460.4	13.2077
GSM900215	8879.43	13.1163
GSM900216	6683.55	12.7064
GSM900217	4580.81	12.1614
GSM900218	6611.08	12.6907
GSM900219	1966.33	10.9413
GSM900220	6004.83	12.5519
GSM900221	11797	13.5261
GSM900240	7945.29	12.9559
GSM900241	6267.81	12.6137
GSM900242	6405.77	12.6452
GSM900243	7678.44	12.9066
GSM900244	5633.85	12.4599
GSM900245	9067.31	13.1465
GSM900246	6469.34	12.6594
GSM900247	5112	12.3197
GSM900248	7591.88	12.8902
GSM900249	4095.86	12
GSM900250	3561.29	11.7982
GSM900251	4442.9	12.1173
GSM900252	9258.28	13.1765
GSM900253	11923.1	13.5415
GSM900254	12837.3	13.6481
GSM900255	6341.48	12.6306
GSM900256	2821.83	11.4624
GSM900257	11437.6	13.4815
GSM900258	5334.19	12.3811
GSM900259	1746.57	10.7703
GSM900275	12568.9	13.6176
GSM900276	12176.2	13.5718
GSM900277	12568.9	13.6176
GSM900278	5754.21	12.4904
GSM900279	5816.43	12.5059
GSM900280	5213.87	12.3481
GSM900281	8778.89	13.0998
GSM900282	5877.99	12.5211
GSM900283	15006.7	13.8733
GSM900284	10305.9	13.3312
GSM900285	8673.43	13.0824
GSM900286	6979.15	12.7688
GSM900287	5213.87	12.3481
GSM900288	6200.11	12.5981
GSM900289	13972.4	13.7703
GSM900290	2496.47	11.2857
GSM900291	4725.59	12.2063
GSM900292	2479.17	11.2756
GSM900293	6536.14	12.6742
GSM900294	3348.53	11.7093
GSM900295	2091.75	11.0305
GSM900296	2392.26	11.2242
GSM900297	8582.54	13.0672
