# Supplementary material for: Integrating microRNA expression, miRNA-mRNA regulation network and signal pathway: a novel strategy for lung cancer biomarker discovery
Source: PeerJ. 2021 Oct 25;9:e12369. doi: 10.7717/peerj.12369 (PMC8552790; doi:10.7717/peerj.12369)
Supplement: Supplemental Information 9 [file peerj-09-12369-s009.xlsx]

## Sheet: TCGA dataset
0 stands for normal tissues and 1 stands for tumor tissues.
sample	MIMAT0000617	MIMAT0000264	MIMAT0000261	MIMAT0000244	MIMAT0000245	MIMAT0000243	MIMAT0000256	MIMAT0000253	MIMAT0000254	MIMAT0000259	MIMAT0002888	MIMAT0000689	MIMAT0000693	MIMAT0000692	MIMAT0004597	MIMAT0004558	MIMAT0000757	MIMAT0000437	MIMAT0000435	MIMAT0000419	MIMAT0000418	MIMAT0000443	MIMAT0000440	MIMAT0000445	MIMAT0004502	MIMAT0000101	MIMAT0000088	MIMAT0000086	MIMAT0000087	MIMAT0000084	MIMAT0000082	MIMAT0000080	MIMAT0000081	MIMAT0000098	MIMAT0000093	MIMAT0000092	MIMAT0000066	MIMAT0000067	MIMAT0000062	MIMAT0000063	MIMAT0000077	MIMAT0000078	MIMAT0000076	MIMAT0004494	MIMAT0005951	MIMAT0000231	MIMAT0000099	MIMAT0000064	MIMAT0002809
0	0.157695	0.031903	0.0208309	0.200802	0.22373	0.106617	0.135416	0.165345	0.0476583	0.0306399	0.225301	0.12497	0.222066	0.214492	0.288741	0.189894	0.324834	0.145003	0.391986	0.253868	0.222174	0.186142	0.095231	0.15526	0.203	0.314095	0.193289	0.334594	0.192418	0.268062	0.293776	0.404086	0.147138	0.191082	0.0709444	0.120454	0.668791	0.665004	0.679517	0.361038	0.263084	0.227574	0.194746	0.147471	0.097971	0.0973987	0.241708	0.38018	0.461213
0	0.0898233	0.0237622	0.0262335	0.210765	0.189323	0.0659596	0.125727	0.160051	0.075291	0.0505887	0.0840369	0.0917436	0.309102	0.196399	0.163791	0.175265	0.269472	0.0805543	0.474251	0.254758	0.189438	0.142373	0.0804306	0.0699414	0.177564	0.265189	0.32297	0.373252	0.167138	0.147127	0.252296	0.390905	0.263347	0.148845	0.0541294	0.110796	0.227711	0.320045	0.245789	0.167678	0.122661	0.162241	0.0721894	0.042361	0.034918	0.0481649	0.176713	0.220174	0.200739
0	0.0946069	0.0351752	0.0371776	0.172597	0.190335	0.0742948	0.103542	0.211782	0.155274	0.0519139	0.108462	0.141695	0.429953	0.309806	0.168409	0.189559	0.240214	0.0719973	0.270839	0.207721	0.207876	0.196411	0.127672	0.0615252	0.183315	0.191233	0.341944	0.303365	0.107978	0.24348	0.344052	0.442386	0.146024	0.171702	0.020408	0.0918134	0.238494	0.180506	0.225796	0.287845	0.106528	0.220629	0.0587471	0.041255	0.0535567	0.0376529	0.169941	0.349836	0.255063
0	0.129056	0.0211356	0.0274738	0.187346	0.231085	0.112415	0.181284	0.126257	0.0315365	0.0427945	0.169878	0.0941318	0.195421	0.20761	0.190497	0.110776	0.273571	0.078848	0.332143	0.179096	0.210957	0.144367	0.0571087	0.094308	0.13559	0.232378	0.241224	0.391816	0.207713	0.168526	0.3671	0.677273	0.0969131	0.124296	0.0438084	0.0915244	0.663122	0.691791	0.518031	0.210734	0.122103	0.180838	0.0893416	0.0282222	0.0482482	0.047571	0.181995	0.308588	0.475196
0	0.0988863	0.0259562	0.0231207	0.254755	0.263348	0.0931096	0.221336	0.180743	0.0987391	0.0369707	0.252046	0.189183	0.282607	0.214785	0.25149	0.26153	0.383531	0.150975	0.437164	0.268606	0.287551	0.283549	0.0799821	0.107832	0.20772	0.326188	0.237572	0.211645	0.149939	0.231737	0.243673	0.468017	0.303478	0.22634	0.0809295	0.1471	0.595827	0.414078	0.48417	0.301994	0.173059	0.316661	0.136506	0.0887775	0.0947269	0.0950232	0.160459	0.394547	0.334458
0	0.113729	0.0224353	0.0172332	0.265235	0.271424	0.101482	0.125036	0.194296	0.073796	0.0262427	0.105239	0.109799	0.313936	0.506001	0.170561	0.187437	0.321591	0.074143	0.485645	0.309183	0.239842	0.223829	0.124084	0.081269	0.113213	0.174096	0.284004	0.563379	0.0990702	0.245711	0.65336	0.579327	0.109144	0.205356	0.0148098	0.0778652	0.461721	0.658192	0.458892	0.277235	0.081827	0.223741	0.0369105	0.0185998	0.02088	0.0509562	0.225239	0.337432	0.175935
0	0.0277878	0.000227759	0	0.026006	0.0662457	0.000105297	0.13209	0	0.000452043	0	0.00464007	0.17876	0.00206022	0	0.0366268	0.038191	0	0.217078	0.00197098	0.00622776	0	0.393918	0.0152489	0.000714588	0.0150869	0	0.026586	0.0121143	0.002131	0	0	0.00197722	0	0.00190017	6.11e-05	0.166761	0.0280145	0.00095428	0.0680625	0.420283	0	0	1.45e-05	0	0.09107	0.00576078	0.000261318	0.186014	0
0	0.112764	0.0280687	0.0380165	0.258636	0.306604	0.0669433	0.1519	0.240555	0.0629922	0.0487358	0.12612	0.18148	0.364371	0.420697	0.294356	0.196762	0.475607	0.136782	0.682866	0.376412	0.426825	0.289731	0.103902	0.113125	0.166253	0.26703	0.449135	0.54575	0.164647	0.324688	0.689709	0.780821	0.145835	0.227059	0.0276754	0.10889	0.732639	0.608223	0.602861	0.432514	0.135276	0.401279	0.0370118	0.0175306	0.0375133	0.0654472	0.213758	0.481979	0.164149
0	0.17364	0.0361886	0.0601791	0.483374	0.462811	0.108812	0.260394	0.165096	0.0230703	0.10189	0.215312	0.201522	0.355048	0.395391	0.259601	0.294863	0.297221	0.216328	0.447121	0.481471	0.445552	0.25653	0.209448	0.294499	0.196025	0.326314	0.500363	0.703235	0.298173	0.498445	0.584465	0.952107	0.314542	0.168791	0.0813977	0.166539	0.469058	0.414715	0.453016	0.406415	0.26158	0.366541	0.115538	0.0831367	0.132122	0.104585	0.464805	0.296101	0.2991
0	0.156233	0.030831	0.0915527	r	0.501276	0.135638	0.280161	0.230036	0.112594	0.134521	0.249855	0.185425	0.439678	0.743105	0.513119	0.353043	0.554777	0.191097	0.784696	0.643703	0.490275	0.251147	0.307669	0.342879	0.22931	0.611707	0.4499	0.746335	0.310146	0.513809	0.367209	0.445315	0.485835	0.276464	0.177259	0.202999	0.628289	1	0.922962	0.712528	0.214061	0.35133	0.118964	0.0857912	0.0640557	0.177634	0.555899	0.700818	0.238348
0	0.203703	0.0544887	0.0636457	0.285807	0.42474	0.118566	0.241146	0.310546	0.106146	0.0860799	0.178321	0.256305	0.546936	0.80987	0.401335	0.258012	0.633429	0.148622	0.286498	0.474857	0.513672	0.312064	0.163851	0.163482	0.264956	0.38349	0.580592	0.622432	0.247192	0.384497	1	0.84596	0.224748	0.41561	0.0546791	0.13183	0.778997	0.811599	0.832649	0.720052	0.20717	0.39375	0.085806	0.0455685	0.0457119	0.121511	0.602233	1	0.305154
0	0.202323	0.0379167	0.0213318	0.159658	0.394445	0.109214	0.138123	0.233432	0.028172	0.0407803	0.114197	0.107578	0.253683	0.200409	0.314292	0.133501	0.31355	0.114472	0.42977	0.211125	0.239361	0.191027	0.0867095	0.0795575	0.134873	0.376668	0.224144	0.239111	0.133008	0.146724	0.485755	0.351763	0.166819	0.200105	0.0412739	0.112263	0.459164	0.646585	0.530518	0.313002	0.107619	0.189914	0.0515096	0.0773485	0.0435885	0.0565982	0.180529	0.387514	0.38696
0	0.0836658	0.000532831	0.00268735	0.119809	0.0815683	0	0.130132	0.00137926	0.000652234	0.000382567	0.0092157	0.301411	0.0205907	0.000140449	0.0680748	0.0938582	0.000563088	0.336177	0.00147907	0.0165171	0.0129983	0.642871	0.0665271	0.00051168	0.038198	0.00946866	0.045173	0.0343164	0.00361514	0.00471888	0.00676782	0.0122295	0.0223966	0.00592567	0.0026057	0.269194	0.0157489	0	0.02702	0.188745	0.00215367	0.0069269	0	0.00449786	0.156364	0.00647345	0	0.130098	0.00573235
0	0.0854998	0.000348952	0.00411053	0.0354509	0.0412679	0.00140738	0.100288	0.000314936	0.000607029	0.00051854	0.012438	0.208744	0.0109802	0.000868233	0.0475151	0.0639866	0.00274787	0.164728	0.00177048	0.00398422	0.00929135	0.291226	0.0986695	0.00165855	0.0346317	0.0117477	0.0242979	0.0129361	0.00192812	0.00384095	0.00201163	0.012083	0.00380983	0.00431657	0.00306374	0.173774	0.039502	0.000628356	0.0403887	0.199411	0.00259988	0.0152461	0.000134261	0.0100465	0.309072	0.00475116	7.47e-05	0.123364	0.0108218
0	0.258661	0.0339779	0.0915249	0.0732307	0.0932998	0.0651044	0.0911748	0.0900475	0.0385496	0.0955726	0.116968	0.0752117	0.204364	0.151519	0.105731	0.127247	0.316456	0.0409493	0.156814	0.235417	0.195022	0.0859422	0.0781881	0.0335239	0.181532	0.259603	0.0529953	0.215748	0.0306354	0.162307	0.193974	0.229505	0.115005	0.428307	0.0693972	0.0806937	0.300823	0.29928	0.296152	0.13163	0.119055	0.154523	0.445457	0.232156	0.0969093	0.0515501	0.108673	0.11892	0.387603
0	0.148544	0.036477	0.0229935	0.287101	0.184897	0.0514428	0.0920242	0.199132	0.129423	0.0471064	0.0696011	0.130472	0.38175	0.197855	0.293763	0.18325	0.258503	0.203221	0.823537	0.277851	0.253274	0.170489	0.08955	0.0779695	0.234765	0.271299	0.501308	0.336702	0.212532	0.171599	0.368347	0.309436	0.162156	0.159104	0.0285202	0.0965535	0.310457	0.337956	0.276567	0.206372	0.0868845	0.153286	0.0275444	0.0164614	0.0312611	0.0538069	0.188543	0.3003	0.105111
0	0.20342	0.0532267	0.0346851	0.278691	0.416367	0.123262	0.22148	0.238174	0.0716456	0.0690372	0.22137	0.181971	0.287775	0.210151	0.345209	0.193691	0.4311	0.145597	0.426827	0.241026	0.254718	0.27328	0.124682	0.164082	0.186847	0.510053	0.344139	0.395862	0.248581	0.196803	0.416205	0.438029	0.357486	0.258055	0.0933982	0.191973	0.669199	0.635327	0.66741	0.384887	0.201326	0.186356	0.0757454	0.0865285	0.0622272	0.0893812	0.242389	0.364586	0.376567
0	0.123025	0.0243054	0.0435422	0.168715	0.224633	0.155779	0.153484	0.239358	0.131254	0.0850267	0.172327	0.140049	0.350087	0.325026	0.280036	0.154383	0.333056	0.0891112	0.385957	0.251238	0.293087	0.249751	0.0753476	0.0662538	0.188752	0.323549	0.196268	0.296313	0.123381	0.232542	0.367037	0.399583	0.262273	0.335352	0.0800745	0.131224	0.592789	0.510449	0.639701	0.41605	0.159638	0.282576	0.160266	0.111986	0.048897	0.0891436	0.344889	0.571483	0.470106
0	0.145758	0.0461243	0.0272512	0.351533	0.390528	0.109184	0.256594	0.193271	0.0477293	0.0400428	0.288587	0.205288	0.286439	0.271629	0.364833	0.206979	0.410244	0.179515	0.469141	0.310769	0.407279	0.377767	0.088354	0.169675	0.17426	0.347045	0.313048	0.305516	0.276217	0.260307	0.379622	0.465966	0.158737	0.290012	0.0802272	0.13762	1	0.689131	0.822076	0.504431	0.218548	0.319342	0.118902	0.0531448	0.0766781	0.130954	0.281661	0.673937	0.436569
0	0.168542	0.00516114	0.00712386	0.138698	0.0378299	0.00516855	0.0547221	0.0202108	0.0426115	0.0013989	0.0699878	0.283195	0.059355	0.00222165	0.082114	0.130039	0.025812	0.83036	0.0104228	0.047888	0.0779415	0.495813	0.34026	0	0.291336	0.0241932	0.0161345	0.0604834	0.000271545	0.0145224	0.016327	0.0210538	0.0622924	0.0111374	0.0517171	0.663849	0.0789298	0.00702056	0.156908	0.237776	0.00912642	0.0458928	0.000193564	0.0127747	0.150761	0.0175199	4.56e-05	0.0619411	0.00364299
0	0.117302	0.0146957	0.0544268	0.190322	0.171462	0.134792	0.104017	0.166813	0.397775	0.0683274	0.144616	0.154822	0.350295	0.560138	0.330172	0.179453	0.473445	0.121865	0.796244	0.468281	0.397651	0.200299	0.171027	0.0826452	0.169872	0.308012	0.20925	0.536666	0.084914	0.321469	0.641649	0.872689	0.190414	0.221518	0.0366834	0.0908464	0.59516	0.614577	0.52968	0.367452	0.158007	0.296361	0.112013	0.0667306	0.0304943	0.0855802	0.251875	0.721101	0.280617
0	0.222529	0.0375823	0.0387718	0.261612	0.196861	0.124325	0.158177	0.166327	0.12199	0.0639624	0.203648	0.133578	0.236879	0.198966	0.217359	0.244221	0.281274	0.141513	0.286498	0.306475	0.270027	0.2332	0.0983705	0.0797163	0.181462	0.329937	0.175117	0.440285	0.125198	0.219702	0.230854	0.374574	0.171892	0.257951	0.0567657	0.106317	0.502186	0.420447	0.44741	0.238399	0.208461	0.229963	0.180968	0.0847589	0.0654713	0.0914598	0.170097	0.436559	0.310511
0	0.172241	0.0231834	0.0332659	0.300427	0.250243	0.147036	0.111186	0.377594	0.493676	0.0554561	0.177741	0.149294	0.376859	0.262321	0.435341	0.158515	0.441506	0.243938	0.815847	0.366664	0.321779	0.218943	0.174316	0.144453	0.247404	0.52071	0.250702	0.607695	0.158398	0.290046	0.503392	0.664714	0.24196	0.275503	0.0609389	0.110602	0.542207	0.73925	0.584466	0.207516	0.153929	0.306348	0.0897546	0.0943076	0.0717235	0.147227	0.232492	0.596701	0.446266
0	0.23889	0.0255654	0.0371737	0.258378	0.127662	0.085595	0.0711489	0.210888	0.295355	0.063218	0.0875814	0.127225	0.364233	0.2625	0.201416	0.204132	0.327177	0.110051	0.454194	0.386585	0.29636	0.174576	0.0923905	0.050427	0.203629	0.311226	0.185243	0.420548	0.0926218	0.241577	0.366975	0.424298	0.153787	0.185915	0.0419356	0.0803881	0.531201	0.53003	0.39783	0.175148	0.117254	0.24997	0.105096	0.0380291	0.0316739	0.0703765	0.156189	0.516767	0.1994
0	0.0981048	0.0317275	0.0314173	0.161729	0.229235	0.113461	0.156119	0.203597	0.0884196	0.0541724	0.130244	0.136552	0.356682	0.556754	0.205971	0.170073	0.285013	0.0903521	0.480539	0.293981	0.270557	0.170389	0.0729556	0.107779	0.197353	0.209836	0.299661	0.549853	0.147984	0.217105	0.507633	0.426092	0.188466	0.248373	0.0354925	0.0844836	0.35222	0.410279	0.432198	0.29412	0.141879	0.170577	0.0812701	0.0291439	0.055916	0.0621214	0.398783	0.352426	0.190614
0	0.160222	0.0269947	0.0429618	0.285677	0.269421	0.0983873	0.199726	0.145069	0.0391469	0.0970107	0.219501	0.117272	0.26921	0.220774	0.501108	0.186041	0.243772	0.245127	0.533631	0.323495	0.311284	0.163111	0.151293	0.108538	0.242457	0.341833	0.231864	0.399576	0.211273	0.223616	0.312396	0.391271	0.296223	0.22763	0.0872809	0.176475	0.247313	0.284	0.370028	0.288442	0.213855	0.199711	0.121466	0.096446	0.0957886	0.0868868	0.234837	0.301363	0.396711
0	0.164407	0.037902	0.0260069	0.247639	0.368109	0.107967	0.134999	0.186528	0.0667668	0.0412504	0.189405	0.128681	0.341386	0.277068	0.204942	0.190229	0.371976	0.0812523	0.422816	0.28315	0.275756	0.214855	0.0606967	0.0924289	0.145624	0.295243	0.365969	0.351539	0.2056	0.241358	0.353455	0.454286	0.158385	0.19937	0.0402968	0.0959367	0.561587	0.562206	0.49051	0.27457	0.144308	0.271043	0.0709429	0.0303237	0.0491919	0.0683573	0.261755	0.450682	0.26851
0	0.172909	0.0278493	0.0352218	0.298098	0.312209	0.130739	0.283314	0.179557	0.125871	0.0656333	0.237224	0.153549	0.321509	0.251047	0.255857	0.231323	0.359949	0.111163	0.278316	0.274408	0.25597	0.277567	0.128719	0.148326	0.191777	0.397001	0.322247	0.437569	0.203469	0.210264	0.311507	0.372011	0.269586	0.250949	0.0758911	0.159609	0.520863	0.544471	0.589142	0.315509	0.223648	0.225683	0.123774	0.055449	0.0848767	0.0856396	0.288511	0.438713	0.344369
0	0.0910901	0.00104686	0.00523556	0.048001	0.0866444	0.00141124	0.155946	0.00406349	0.00885682	0.000401004	0.017078	0.461071	0.022789	0.00108529	0.0710386	0.111111	0.00662192	0.284654	0.00347406	0.0269225	0.0409686	0.78335	0.0772911	0.00546086	0.0585469	0.0126942	0.0531038	0.0282938	0.00435798	0.0146688	0.00751633	0.0223719	0.01535	0.00844093	0.00596462	0.230256	0.0828578	0.0018792	0.105962	0.483784	0.0040521	0.0300108	0.0002977	0.00545642	0.175947	0.0176981	0.00015762	0.253926	0.00444659
0	0.194042	0.0278409	0.0310953	0.208824	0.181685	0.149947	0.108019	0.106542	0.0252175	0.0547693	0.149771	0.0898917	0.314062	0.243641	0.191433	0.196371	0.246115	0.067344	0.250333	0.179947	0.143655	0.129312	0.157722	0.0772726	0.17349	0.396633	0.152829	0.472644	0.0926124	0.237261	0.328286	0.346893	0.233683	0.101209	0.0611323	0.128279	0.328392	0.450097	0.328498	0.197593	0.159859	0.186631	0.204678	0.073164	0.0660021	0.0487588	0.238342	0.289885	0.430515
0	0.0862624	0.0401148	0.0410417	0.160047	0.256263	0.0829497	0.130449	0.271585	0.0783455	0.0665229	0.170072	0.236469	0.481631	0.620212	0.267838	0.258515	0.483017	0.0959102	0.739275	0.410723	0.395292	0.210967	0.086261	0.100457	0.211444	0.2513	0.443027	0.414131	0.158892	0.317153	0.521091	0.602065	0.200169	0.224341	0.0397065	0.0879179	0.5783	0.561222	0.596109	0.386682	0.16291	0.331718	0.0858478	0.0689426	0.0434706	0.0831453	0.320784	0.67121	0.155898
0	0.0775713	0.0180389	0.0271239	0.0891448	0.181418	0.0733702	0.0943277	0.181652	0.121264	0.0394966	0.0667655	0.112454	0.355221	0.394165	0.129099	0.17024	0.297986	0.0499974	0.63162	0.192712	0.162912	0.132702	0.0556137	0.0546439	0.139138	0.179637	0.393061	0.282442	0.110089	0.119582	0.463221	0.445315	0.112804	0.186068	0.011288	0.0579877	0.336174	0.335078	0.307065	0.304821	0.0858579	0.106997	0.0492476	0.0226183	0.0243011	0.0323673	0.202542	0.354253	0.132326
0	0.185924	0.0579866	0.0292349	0.474059	0.516999	0.129413	0.278059	0.239873	0.0750359	0.0562811	0.272024	0.204062	0.345852	0.302209	0.324088	0.218872	0.431731	0.174371	0.380481	0.340477	0.364722	0.395314	0.123935	0.218258	0.186864	0.378123	0.420781	0.388836	0.348412	0.249771	0.448111	0.524075	0.334223	0.234105	0.12488	0.207172	0.743385	0.700603	0.854203	0.537602	0.214368	0.283968	0.0955511	0.0630438	0.0813967	0.122996	0.3673	0.572764	0.380264
0	0.152552	0.0325695	0.0167164	0.423211	0.270321	0.087299	0.169824	0.25692	0.0702346	0.0328662	0.123155	0.142102	0.360135	0.275523	0.276792	0.187493	0.339092	0.240422	0.677687	0.533885	0.406027	0.244367	0.139034	0.136266	0.226006	0.352664	0.434795	0.561597	0.228048	0.28412	0.578337	0.614295	0.180397	0.223654	0.0524703	0.112252	0.346995	0.533956	0.456312	0.336832	0.140485	0.292803	0.0655712	0.06662	0.0296685	0.100012	0.26463	0.473555	0.212418
0	0.214884	0.0563923	0.0273863	0.194592	0.317382	0.106649	0.183113	0.229325	0.0606416	0.0451867	0.199588	0.141388	0.299664	0.246527	0.325711	0.201563	0.372021	0.125252	0.410841	0.268142	0.257318	0.225324	0.0879055	0.119283	0.204748	0.361806	0.305493	0.36536	0.215948	0.229945	0.390709	0.417414	0.171306	0.237521	0.0552694	0.121488	0.498073	0.546045	0.616074	0.379155	0.172167	0.235961	0.0998377	0.036923	0.066415	0.08463	0.301268	0.476472	0.39955
0	0.077212	0.043736	0.0201392	0.232372	0.287617	0.0649208	0.141319	0.228904	0.066431	0.0312414	0.114262	0.184896	0.306109	0.339032	0.216922	0.207259	0.303707	0.117005	0.489488	0.365349	0.355864	0.221336	0.0813276	0.108344	0.1762	0.188527	0.432944	0.485041	0.196917	0.274061	0.434341	0.478342	0.15789	0.215894	0.0312074	0.101922	0.413437	0.327318	0.368517	0.361	0.1734	0.247925	0.0733256	0.0288306	0.0491329	0.0867086	0.293435	0.374073	0.131148
0	0.162372	0.025743	0.0336833	0.268987	0.18035	0.111788	0.121725	0.167238	0.0397766	0.0687422	0.117097	0.129232	0.402134	0.272497	0.212149	0.19464	0.302716	0.0944884	0.403744	0.308255	0.241623	0.142672	0.13126	0.0933287	0.198944	0.383067	0.351366	0.394093	0.173772	0.249918	0.39584	0.402658	0.210147	0.131106	0.0548725	0.111052	0.355851	0.509518	0.371983	0.189051	0.122052	0.233916	0.0902376	0.052942	0.0681845	0.0424041	0.201422	0.280998	0.441284
0	0.142758	0.0553977	0.0188273	0.397852	0.442821	0.0892791	0.218673	0.29415	0.0465604	0.0335023	0.195721	0.238637	0.384674	0.310406	0.283905	0.303406	0.413397	0.167675	0.600046	0.392813	0.391777	0.335593	0.0986695	0.216847	0.248628	0.324087	0.524834	0.450812	0.392473	0.273183	0.433328	0.433562	0.21464	0.247741	0.0859781	0.125822	0.748314	0.619671	0.758585	0.441315	0.255252	0.293491	0.0980731	0.0350059	0.0852306	0.129944	0.370749	0.545883	0.267545
0	0.0728318	0.00167998	0.00100577	0.0433433	0.0930028	0.00139326	0.4481	0.00245166	0.0149917	0.000523149	0.0551653	0.388137	0	0.000983146	0.0711322	0.109939	0.00560836	0.187555	0	0.00553149	0.0357693	0.829711	0.0551652	0.00257605	0.0365721	0.0204851	0.0176754	0.00636139	0.00341694	0.000621868	0.00151262	0	0.0046239	0.0107475	0.0205199	0.229672	0.0494701	0.000528524	0.0507166	0.389568	0.00809546	0.0155726	0.00116233	0.00886669	0.284476	0.0324267	0.00033598	0.201336	0.0101789
0	0.18714	0.0211147	0.0285511	0.258119	0.215015	0.160026	0.135661	0.128126	0.0783455	0.0394828	0.265257	0.0962264	0.266977	0.22869	0.237388	0.174707	0.261656	0.13006	0.357243	0.208804	0.20027	0.170588	0.0989685	0.0627426	0.177494	0.341911	0.153535	0.339607	0.116322	0.158064	0.243782	0.457398	0.168089	0.246193	0.0551982	0.119404	0.413214	0.520035	0.408416	0.158485	0.189179	0.201808	0.136098	0.0419555	0.112599	0.0718019	0.145224	0.288822	0.734169
0	0.22481	0.0511371	0.0320772	0.301203	0.336649	0.107231	0.257515	0.227678	0.0347234	0.0456315	0.288651	0.182741	0.35567	0.30489	0.34315	0.229704	0.407451	0.160979	0.445431	0.353396	0.41864	0.311366	0.127822	0.134793	0.253977	0.371097	0.284066	0.464269	0.213806	0.372682	0.429507	0.53418	0.174705	0.306954	0.0661605	0.146678	0.704476	0.61951	0.710907	0.417369	0.238666	0.412039	0.177117	0.0498636	0.0998584	0.0928851	0.412751	0.449373	0.729508
0	0.0574095	0.00774799	0.0126934	0.0830638	0.0561522	0.0332199	0.0349986	0.110835	0.0678614	0.0187734	0.0439518	0.0428705	0.12435	0.0568693	0.0901632	0.0702959	0.10809	0.111861	0.184757	0.125948	0.119343	0.0615155	0.0343848	0.032924	0.139803	0.141822	0.130812	0.156764	0.0637787	0.0687347	0.117782	0.250119	0.0670596	0.0929106	0.0104737	0.0406275	0.0933447	0.0825144	0.0966863	0.124738	0.0497429	0.105158	0.0185563	0.0185998	0.0348	0.0351586	0.0203994	0.171947	0.120808
0	0.0868612	0.00067074	0.00367722	0.0654677	0.0743217	0.00520579	0.133544	0.000847905	0.00077816	0.000354911	0.0221048	0.426789	0.020326	0.0020429	0.0708514	0.0881072	0.00637416	0.369474	0.00326378	0.02406	0.0163682	0.626122	0.129167	0.00286718	0.0516765	0.0109719	0.0446211	0.0447431	0.00400841	0.015437	0.00792178	0.0172824	0.0111299	0.00987429	0.00484498	0.227777	0.0389461	0.0013448	0.0682966	0.32376	0.00307667	0.0107943	0.000172215	0.00602787	0.176065	0.00760185	9.75e-05	0.163413	0.00557163
0	0.148462	0.0295355	0.0200796	0.185147	0.164686	0.0670434	0.0994817	0.16653	0.0266576	0.0347675	0.14874	0.113187	0.296959	0.249808	0.195052	0.110274	0.255079	0.0883615	0.355415	0.22095	0.218323	0.134895	0.082972	0.0730733	0.209958	0.276688	0.271171	0.37349	0.164972	0.188206	0.343178	0.305445	0.128102	0.143897	0.0378234	0.0853783	0.290558	0.352916	0.314921	0.213352	0.121367	0.196274	0.0988426	0.0442597	0.0545004	0.0465613	0.210877	0.292012	0.30285
0	0.0872456	0.0160727	0.0186365	0.0701255	0.0819653	0.0339416	0.0405413	0.0903237	0.0143104	0.0316263	0.0440807	0.0550326	0.244027	0.0842441	0.0663276	0.118258	0.112055	0.0334005	0.146172	0.081309	0.0557963	0.0586241	0.0246674	0.0258575	0.105451	0.170711	0.171282	0.136268	0.0610726	0.0950726	0.12968	0.144813	0.0813676	0.0492067	0.0190339	0.0545534	0.106907	0.13325	0.117435	0.0859554	0.0784252	0.0825899	0.0701831	0.0382871	0.0652353	0.0141347	0.0679529	0.102863	0.22849
0	0.198271	0.0358794	0.0255815	0.281666	0.49833	0.144159	0.198618	0.295226	0.0194669	0.0388789	0.163691	0.223845	0.363841	0.265756	0.417902	0.250642	0.586828	0.17724	1	0.302878	0.421385	0.368893	0.0882045	0.124462	0.195098	0.503651	0.463409	0.312398	0.309056	0.1825	0.547663	0.668046	0.169235	0.295767	0.0682878	0.108679	0.301453	0.264905	1	0.471958	0.169584	0.278915	0.089311	0.0232635	0.0283709	0.114087	0.217292	0.822955	0.503268
0	0.168542	0.135239	0.0369351	0.374693	0.627224	0.194124	0.506651	0.365791	0.0349688	0.0639901	0.554231	0.323266	0.545877	0.499374	0.409353	0.636628	0.30427	0.38209	0.177769	0.404998	0.492201	0.39322	0.135147	0.41784	0.368484	0.359642	0.58475	0.587118	0.655477	0.525222	0.49179	0.400278	0.328577	0.388173	0.170572	0.313895	0.126992	0.113066	0.280651	0.685013	0.512941	0.521752	0.230479	0.204911	0.23782	0.239399	0.92797	0.32849	0.326155
0	0.154815	0.0455685	0.0180243	0.306767	0.436951	0.141259	0.327498	0.174459	0.025337	0.0314189	0.380228	0.201776	0.145965	0.241573	0.255483	0.173534	0.134713	0.320692	0.0535599	0.137939	0.27229	0.378664	0.112423	0.460759	0.17856	0.191615	0.183436	0.179612	0.256243	0.121447	0.156533	0.196368	0.106981	0.242991	0.0987216	0.227216	0.130586	0.0610622	0.139135	0.317434	0.239978	0.281803	0.0454565	0.18467	0.14038	0.211011	0.155133	0.203544	0.166988
0	0.105819	0.065043	0.0489845	0.5262	0.407988	0.263209	0.470184	0.268736	0.0746904	0.0908389	0.792808	0.291593	0.403216	0.460036	0.509344	0.342267	0.312469	0.296391	0.11143	0.468513	0.495571	0.41675	0.215877	0.333545	0.308084	0.511145	0.247106	0.49671	0.294213	0.517284	0.299437	0.570137	0.519687	0.379073	0.314842	0.333228	0.25743	0.151848	0.288255	0.469922	0.786107	0.567679	0.440255	0.203473	0.251445	0.426179	0.583943	0.474782	0.47016
0	0.189485	0.107141	0.036319	0.62466	0.581689	0.260636	0.860754	0.655847	0.413303	0.0542715	0.97042	0.445665	0.4294	0.480018	1	0.467169	0.469796	0.680032	0.244292	0.615774	0.69844	1	0.344147	0.694412	0.511573	0.878489	0.293308	0.521271	0.357194	0.643816	0.515664	0.688001	0.554725	0.886418	0.484946	0.475855	0.631179	0.383488	0.605958	0.644308	0.762754	0.66304	0.44872	0.186053	0.392356	0.693669	0.739263	0.959351	0.620701
0	0.05896	0.0256093	0.0305547	0.285548	0.242028	0.109314	0.161762	0.196255	0.174711	0.0569933	0.292067	0.121532	0.282388	0.252132	0.348142	0.271468	0.151088	0.314798	0.121643	0.323186	0.200414	0.115354	0.175064	0.157562	0.28985	0.296001	0.168541	0.364337	0.31959	0.244284	0.209553	0.371792	0.402709	0.229146	0.168974	0.22212	0.0404654	0.0504535	0.101707	0.315152	0.397692	0.188247	0.123739	0.227474	0.129586	0.245694	0.223354	0.333697	0.214561
0	0.0576995	0.0167831	0.021781	0.219304	0.163392	0.448935	0.212612	0.224632	0.185909	0.0377474	0.453889	0.174031	0.24977	0.303792	0.378997	0.228364	0.168611	0.383977	0.187676	0.298584	0.372761	0.194217	0.106443	0.184081	0.290427	0.359739	0.14367	0.31992	0.169247	0.240919	0.195347	0.512577	0.216874	0.290808	0.173921	0.181843	0.178463	0.111921	0.192191	0.260057	0.48582	0.331666	0.325521	0.399628	0.150761	0.329374	0.206074	0.319847	0.335155
0	0.202916	0.130807	0.0700341	0.521283	0.725324	0.145232	0.519479	0.743787	0.382115	0.0854323	0.594831	0.667248	0.628539	0.258223	0.758369	0.868174	0.434344	0.826224	0.271606	0.584017	0.991768	0.841276	0.242787	0.511292	0.705482	0.717031	0.865033	0.382531	0.583709	0.381571	0.355997	0.929589	0.431338	0.874737	0.239369	0.39341	0.510746	0.162888	0.477889	0.871892	0.637038	0.691057	0.167272	0.132374	0.276808	0.512056	0.17944	0.761478	0.351495
0	0.316833	0.130424	0.0925665	0.778626	0.702307	0.473086	0.773726	0.790375	0.24698	0.176253	0.948959	0.629176	0.918478	0.673532	0.704957	0.916136	0.31355	0.745877	0.529195	0.991916	1	0.684746	0.458663	0.157562	0.64267	0.855587	0.738589	0.64496	0.635621	0.885174	0.646717	0.887152	0.67916	0.902031	0.447774	0.439673	0.706366	0.607732	0.93331	0.793363	1	0.81789	0.612234	0.556592	0.39619	0.795641	0.889573	0.916467	0.720722
0	0.162655	0.0987262	0.0412922	0.32281	0.51674	0.240953	0.505859	0.421528	0.117957	0.0552556	0.828253	0.403623	0.442268	0.518182	0.757246	0.562479	0.379522	0.69862	0.464452	0.640337	0.964953	0.512861	0.113171	0.20117	0.365914	0.461556	0.375187	0.495198	0.408886	0.663533	0.441374	0.582696	0.254302	1	0.187845	0.27679	0.281072	0.146645	0.372663	0.780964	0.81206	0.786246	0.412427	0.177076	0.315206	0.636536	0.978452	0.796374	0.325619
0	0.160544	0.119283	0.0612962	0.596196	0.472493	0.195173	0.372286	0.524708	0.0783455	0.114441	0.704775	0.464824	0.558676	0.321195	0.630955	0.630262	0.304924	0.615015	0.182262	0.52201	0.525371	0.671685	0.251308	0.386504	0.500087	0.708023	0.391231	0.439727	0.382107	0.474266	0.284295	0.577972	0.845659	0.484318	0.397441	0.534859	0.228637	0.136717	0.279792	0.451887	0.608019	0.497946	0.207545	0.246	0.372773	0.486697	0.400811	0.610469	0.337137
0	0.211487	0.183233	0.0894617	0.805149	0.918305	0.209117	0.619493	0.616246	0.156798	0.201249	0.524844	0.496595	0.922932	0.561351	0.95938	0.561865	0.675954	0.603873	0.540895	0.91548	0.861207	0.566102	0.359396	0.613505	0.637233	0.786244	1	0.846028	0.799547	0.773128	0.804217	0.809161	0.901693	0.583654	0.323586	0.477305	0.442859	0.422382	0.766926	0.912344	0.567415	0.628044	0.149431	0.337893	0.229739	0.357525	0.745933	0.833342	0.297064
0	0.199134	0.0704528	0.0258598	0.3144	0.550797	0.242869	0.63998	0.237042	0.0423887	0.0429927	0.723593	0.214555	0.361643	0.388458	0.408948	0.384199	0.17012	0.370767	0.124444	0.309609	0.478433	0.385842	0.125878	0.137113	0.313258	0.345077	0.299825	0.380536	0.421888	0.284596	0.219143	0.262019	0.198176	0.557941	0.151406	0.30088	0.177944	0.135963	0.210024	0.305513	0.544245	0.424982	0.302891	0.179122	0.270143	0.264996	0.599052	0.275327	0.521376
0	0.250682	0.043736	0.0907855	0.16134	0.0380917	0.131886	0.145566	0.293485	0.0259763	0.121707	0.175743	0.12022	0.23666	0.334385	0.11272	0.27828	0.138948	0.396774	0.102198	0.434318	0.398999	0.175673	0.237405	0.0807485	0.48271	0.189418	0.0254637	0.489984	0.0240863	0.668179	0.211954	0.526125	0.236112	0.143045	0.137268	0.230434	0.0937523	0.0524942	0.0972554	0.216276	0.465306	0.535692	0.650256	0.0943076	0.335732	0.571327	0.225561	0.122465	0.199721
0	0.0778297	0.0388381	0.0154602	0.305344	0.255178	0.188518	0.287374	0.230947	0.218088	0.0330966	0.479345	0.179333	0.27989	0.301111	0.311172	0.262758	0.171179	0.42839	0.175321	0.354789	0.37719	0.300798	0.0756466	0.120236	0.233296	0.24231	0.235265	0.344607	0.272592	0.266818	0.181749	0.226758	0.221504	0.368957	0.170938	0.206866	0.178092	0.115271	0.205993	0.335093	0.379678	0.300246	0.192086	0.146918	0.119087	0.41246	0.505067	0.403135	0.189864
0	0.313424	0.0875827	0.0835185	0.56605	0.448636	0.464143	0.407371	0.627093	0.459631	0.127846	0.604821	0.493511	0.870517	0.471246	0.716657	0.702345	0.370219	0.788972	0.324783	0.620842	0.904776	0.630508	0.279264	0.277225	0.765498	0.66225	0.564365	0.504658	0.406491	0.366097	0.367209	0.516715	0.472693	0.90202	0.196782	0.317285	0.301453	0.170863	0.375384	0.544294	0.607489	0.598773	0.298931	0.188025	0.265483	0.384844	0.349784	0.699073	0.453177
0	0.198163	0.0598693	0.039217	0.424376	0.49425	0.261379	0.461748	0.459458	0.147082	0.0602289	0.632468	0.352818	0.500357	0.52343	0.72689	0.5067	0.352156	0.572359	0.341812	0.583282	0.795253	0.483649	0.167439	0.323858	0.387154	0.476751	0.387836	0.647244	0.415018	0.484398	0.483634	0.484933	0.347867	0.723152	0.200059	0.294762	0.201067	0.13818	0.339081	0.563107	0.70859	0.605029	0.303658	0.166384	0.229621	0.441383	0.819612	0.672519	0.358352
0	0.229071	0.110269	0.0594715	0.303532	0.571931	0.245342	0.578347	0.382074	0.128742	0.100159	0.871302	0.351597	0.492104	0.451494	0.571273	0.514015	0.350083	0.37299	0.205304	0.453969	0.641633	0.523629	0.154881	0.241028	0.326859	0.540605	0.335669	0.412832	0.38248	0.383327	0.327693	0.404416	0.55283	0.546821	0.338894	0.44478	0.341251	0.23485	0.505285	0.729062	0.576994	0.544062	0.300891	0.269558	0.287425	0.372372	0.65795	0.612132	0.462124
0	0.169361	0.0577296	0.0239715	0.417518	0.240123	0.16682	0.226245	0.122144	0.0270548	0.0402248	0.334859	0.126723	0.196791	0.323774	0.23146	0.186879	0.126943	0.665607	0.0869525	0.371886	0.291402	0.322333	0.206458	0.491663	0.181829	0.208084	0.140548	0.45622	0.16607	0.323225	0.264039	0.297755	0.150531	0.170104	0.125888	0.212712	0.114615	0.0892031	0.145788	0.222068	0.280346	0.274412	0.0930262	0.346464	0.177952	0.223186	0.344022	0.206107	0.284582
0	0.175783	0.11547	0.0707616	0.846552	0.672254	0.295104	0.702347	0.861202	0.250031	0.138462	0.782239	0.457005	0.832098	0.589045	0.877734	0.793412	0.498423	0.747764	0.371535	0.768606	0.950895	0.675773	0.332785	0.496074	0.6887	0.698465	0.891827	0.897095	0.8161	0.624684	0.724983	0.688624	0.903334	0.730363	0.36202	0.493632	0.238753	0.2467	0.544834	0.999719	0.75429	0.828993	0.179904	0.318168	0.181727	0.493942	0.94182	0.915294	0.282224
0	0.147674	0.0720826	0.0270365	0.57226	0.333061	0.131886	0.440383	0.162384	0.0244071	0.0520982	0.317007	0.180469	0.315144	0.31227	0.299223	0.218481	0.172733	0.429812	0.136775	0.335022	0.369873	0.319741	0.193452	0.390633	0.204119	0.314611	0.334137	0.418152	0.397842	0.451293	0.277917	0.302296	0.195317	0.244062	0.135659	0.205032	0.095531	0.0716033	0.145748	0.233622	0.370933	0.337682	0.119651	0.397194	0.158075	0.172883	0.475005	0.216876	0.298939
0	0.250569	0.111433	0.028559	0.374046	0.504806	0.153572	0.467996	0.410641	0.159277	0.0455024	0.490945	0.309086	0.357039	0.201647	0.675756	0.333389	0.34175	0.340468	0.125782	0.285897	0.381282	0.550449	0.170579	0.24071	0.383064	0.615716	0.364084	0.302919	0.360353	0.215825	0.321284	0.388708	0.466916	0.381709	0.214289	0.306482	0.278478	0.194667	0.375359	0.46617	0.335728	0.296	0.086614	0.0557624	0.15253	0.321178	0.184501	0.567775	0.326851
0	0.193651	0.102339	0.0541286	0.477681	0.373226	0.249141	0.310769	0.415847	0.163962	0.0830493	0.391764	0.342623	0.545313	0.237602	0.458335	0.643551	0.221474	0.402745	0.179474	0.341134	0.348209	0.410269	0.158768	0.265889	0.474844	0.52454	0.573647	0.430668	0.453792	0.308081	0.25331	0.330819	0.427639	0.371379	0.192588	0.263926	0.137108	0.0949699	0.183218	0.264375	0.466084	0.306416	0.238247	0.17903	0.23953	0.261848	0.322292	0.294466	0.455963
0	0.333768	0.216104	0.0482769	0.938155	0.945506	0.232633	0.573438	0.478441	0.0918132	0.090696	0.704453	0.34465	0.721732	0.615654	0.717125	0.477499	0.532794	0.425624	0.291976	0.720176	0.803967	0.432901	0.272089	0.550595	0.461837	0.859455	0.959834	0.849892	0.248581	0.741486	0.809534	0.754128	0.717421	0.406883	0.366234	0.366198	0.214148	0.34505	0.553997	0.614029	0.593023	0.738325	0.189857	0.134364	0.184794	0.290652	0.949802	0.488441	0.65038
0	0.274027	0.122724	0.0751424	0.598654	0.888251	0.293769	0.573078	0.533998	0.215127	0.127178	0.660501	0.331493	0.740861	0.5143	0.78963	0.519542	0.510721	0.398919	0.302238	0.595234	0.640044	0.4332	0.220212	0.257543	0.564019	0.876659	0.577761	0.636033	0.596526	0.464791	0.551141	0.591373	0.568707	0.690355	0.294923	0.333328	0.213481	0.264905	0.448518	0.600967	0.491143	0.511267	0.227717	0.188431	0.163324	0.39108	0.628574	0.813168	0.717401
0	0.227319	0.148741	0.0457406	0.757148	0.520252	0.186118	0.40979	0.436892	0.105168	0.105105	0.574016	0.326782	0.532008	0.333069	0.409353	0.526912	0.270553	0.473321	0.117344	0.43192	0.381234	0.530209	0.339513	0.709348	0.438656	0.550957	0.626308	0.597582	0.663299	0.401068	0.379325	0.484713	0.723002	0.299085	0.312695	0.460039	0.164233	0.143911	0.286562	0.425948	0.450275	0.32871	0.0915157	0.114843	0.231981	0.366908	0.400672	0.41175	0.238134
0	0.175676	0.117003	0.0810299	0.668262	0.268165	0.282881	0.528909	0.323036	0.218821	0.167965	0.801379	0.351802	0.558699	0.742109	0.533616	0.673032	0.240304	0.459438	0.0914933	0.35506	0.391826	0.418345	0.3881	0.468435	0.443743	0.837682	0.240176	0.340611	0.31725	0.406921	0.323327	0.396946	1	0.38379	0.0987216	0.207172	0.119062	0.127327	0.246837	0.473962	0.915784	0.439678	0.495876	0.0943076	0.495399	0.726096	0.778793	0.399864	0.889639
0	0.140628	0.0599717	0.0229578	0.41299	0.427846	0.121197	0.414771	0.263156	0.178806	0.0413841	0.513244	0.265926	0.342963	0.379086	0.389948	0.452094	0.199829	0.61093	0.196292	0.422559	0.469286	0.385643	0.146061	0.292911	0.244152	0.365384	0.279564	0.290554	0.345129	0.351575	0.206434	0.309582	0.209906	0.360285	0.192425	0.241676	0.130216	0.0749183	0.145059	0.256033	0.390304	0.422403	0.225124	0.336694	0.210216	0.408897	0.515774	0.285251	0.269849
0	0.212552	0.151633	0.0623656	0.396817	0.74706	0.276138	0.522718	0.654757	0.535949	0.0898571	0.63975	0.492612	0.821613	0.45526	0.772907	0.624958	0.471733	0.434828	0.323512	0.48534	0.610341	0.63679	0.18508	0.288685	0.654907	0.784143	0.705074	0.607105	0.506996	0.493068	0.501832	0.873348	0.428844	0.723536	0.186114	0.330749	0.295338	0.201655	0.404689	0.632415	0.628509	0.595541	0.212558	0.0956717	0.244662	0.322425	0.389595	0.646865	0.499411
0	0.140508	0.0952973	0.0448064	0.815112	0.445009	0.350525	0.504506	0.570889	0.372503	0.0867136	0.707289	0.37007	0.729536	0.524349	0.825976	0.627303	0.259899	0.829973	0.236299	0.607961	0.655113	0.564905	0.229481	0.267132	0.688735	0.716022	0.448434	0.601673	0.571855	0.572338	0.355576	0.47977	0.651807	0.549083	0.348442	0.406658	0.170681	0.125002	0.221566	0.394664	0.87811	0.588975	0.60566	0.0943076	0.386988	0.704597	0.67831	0.507252	0.595414
0	0.215149	0.106658	0.0343551	0.610558	0.628774	0.182409	0.441952	0.454857	0.21937	0.0583899	0.512599	0.275192	0.534149	0.511542	0.726016	0.354997	0.28481	0.862106	0.339521	0.635038	0.746149	0.475075	0.195993	0.319712	0.421664	0.47844	0.430458	0.608103	0.470214	0.52054	0.413476	0.417195	0.277434	0.692216	0.202329	0.264487	0.145594	0.124553	0.256299	0.418671	0.478649	0.541312	0.191525	0.176043	0.169282	0.402898	0.794399	0.461778	0.262134
0	0.12842	0.0782613	0.0286346	0.316341	0.504882	0.122636	0.36408	0.250147	0.0504706	0.0525131	0.439711	0.176663	0.366799	0.423149	0.571054	0.304802	0.265958	0.354066	0.196711	0.388171	0.390815	0.199003	0.133204	0.294772	0.340757	0.480615	0.342688	0.511101	0.534766	0.342649	0.417313	0.533375	0.469691	0.293714	0.244448	0.342819	0.103424	0.117561	0.244775	0.543175	0.413477	0.274154	0.133234	0.192099	0.1392	0.214931	0.605101	0.407143	0.295136
0	0.239546	0.135272	0.0406243	1	0.728644	0.211995	0.927181	0.422935	0.072611	0.056159	0.840304	0.476793	0.548053	0.752375	0.690606	0.555779	0.402991	1	0.277671	0.711821	0.996052	0.859023	0.350725	0.157562	0.502972	0.551476	0.607997	0.706504	0.773409	1	0.641212	0.721065	0.431358	0.535705	0.285976	0.414183	0.319314	0.193554	0.466811	0.885659	0.713983	1	0.253032	0.267494	0.29061	0.441026	1	0.565649	0.519769
0	0.204094	0.0689775	0.0709643	0.473282	0.435631	0.131886	0.447769	0.358538	0.0761919	0.10864	0.783979	0.348342	0.787936	0.948315	0.886157	0.602959	0.430853	0.707409	0.654354	0.720486	0.891248	0.381157	0.250561	0.418616	0.51458	0.683002	0.424465	0.727583	0.355293	0.598017	0.609135	0.702977	0.402735	0.757163	0.208599	0.284887	0.565441	0.43829	0.652297	0.762205	0.983944	0.691865	0.658601	0.549366	0.373422	0.383181	0.902014	0.743593	0.933569
0	0.27455	0.0907233	0.0529996	0.698926	0.969955	0.308144	1	0.720425	0.0783455	0.0749854	1	0.68025	0.493486	0.547932	0.77765	0.84919	0.64147	0.685668	0.306914	0.724161	0.930098	0.319741	0.294513	0.877752	0.489773	1	0.343609	0.443472	0.4573	0.710978	0.534751	0.840394	0.448356	0.675681	0.545305	0.414649	0.745424	0.370399	0.665731	0.709781	0.755711	0.862665	0.12378	0.207657	0.382329	0.147227	0.65022	0.782606	0.592735
0	0.213573	0.115835	0.0227033	0.507957	0.937798	0.171398	0.71755	0.399557	0.0428698	0.0358898	0.646517	0.399443	0.451268	0.658044	0.571553	0.402289	0.330713	0.482085	0.192218	0.446967	0.738109	0.711266	0.24189	0.964641	0.310094	0.425437	0.565394	0.380617	0.711464	0.381717	0.449904	0.348614	0.261075	0.412611	0.239949	0.297218	0.346105	0.225002	0.479883	0.682967	0.557747	0.645834	0.130223	0.153591	0.236227	0.374629	0.931361	0.523746	0.324601
0	0.0993149	0.020141	0.0291395	0.199767	0.174824	0.221296	0.16241	0.205072	0.232686	0.0576892	0.368886	0.127725	0.286163	0.226647	0.302249	0.253769	0.126267	0.212011	0.0576677	0.15728	0.22901	0.174477	0.119001	0.088062	0.252911	0.304085	0.126624	0.241099	0.131446	0.132385	0.137181	0.176266	0.245829	0.256979	0.120422	0.19254	0.0768547	0.0434212	0.109363	0.189456	0.268318	0.216229	0.12378	0.134567	0.160965	0.186245	0.151699	0.319329	0.21949
0	0.34389	0.144013	0.0638206	0.66257	0.798069	0.334678	0.632983	0.49122	0.155722	0.108234	0.686151	0.330336	0.654482	0.443131	0.759554	0.578727	0.413532	0.363321	0.196336	0.53199	0.555267	0.659023	0.244581	0.411506	0.547061	0.733623	0.504951	0.594546	0.548197	0.493507	0.489419	0.528066	0.494438	0.42957	0.300541	0.369121	0.357667	0.344912	0.520182	0.510064	0.564827	0.491449	0.309322	0.129903	0.274154	0.429861	0.596163	0.625709	0.8126
0	0.344829	0.043736	0.0762038	0.987838	0.333061	0.249596	0.738929	0.616639	0.176429	0.133753	0.721725	0.618941	0.99398	0.611683	0.681621	0.821831	0.661674	0.575074	0.335772	0.808525	0.913826	0.838883	0.329795	0.818398	0.652617	0.834456	0.334137	0.789133	1	0.930278	0.728866	0.826773	0.675272	0.562417	0.310832	0.458883	0.482361	0.380963	0.7788	1	0.706244	0.836058	0.169612	0.129443	0.328182	0.3735	0.878135	0.853299	0.617004
0	0.210397	0.138162	0.0500101	0.70229	0.818318	0.240967	0.622819	0.353764	0.0873541	0.0773223	0.576336	0.370804	0.783309	0.71273	0.656881	0.635008	0.46876	0.553668	0.474513	0.918343	0.835066	0.507976	0.284796	0.584842	0.399549	0.594288	0.762217	0.815419	0.685205	0.950909	0.646124	1	0.411501	0.557447	0.177391	0.281075	0.400541	0.433572	0.583688	0.651709	0.793581	0.808109	0.297899	0.201648	0.270969	0.282635	0.834418	0.532961	0.596486
0	0.248294	0.141476	0.0332659	0.742787	0.57971	0.243184	0.333084	0.55015	0.142255	0.0547693	0.557131	0.388989	1	0.382125	0.681091	0.613847	0.533605	0.567111	0.281168	0.649814	0.581889	0.510768	0.437584	0.421254	0.653264	0.875129	0.804293	0.866737	0.484509	0.65223	0.540739	0.881879	0.233683	0.479562	0.398164	0.602527	0.315275	0.29802	0.548243	0.762603	0.596219	0.589594	0.19076	0.364622	0.252802	0.282338	0.455889	0.566658	0.53118
0	0.270094	0.244538	0.0394794	0.913055	0.679185	0.295921	0.657285	0.497363	0.181947	0.0603165	0.716376	0.402149	0.688286	0.440794	0.657193	0.60469	0.341367	0.598702	0.194364	0.643625	0.620547	0.803789	0.320377	0.571521	0.486749	0.667969	0.609894	0.666253	0.626839	0.549658	0.448688	0.555893	0.506734	0.4974	0.332767	0.4174	0.322945	0.245861	0.431213	0.530492	0.559854	0.525447	0.228413	0.140005	0.316444	0.392683	0.575558	0.57121	0.513018
0	0.123737	0.0412829	0.023244	0.303273	0.236496	0.248568	0.326634	0.18796	0.16218	0.0381991	0.50435	0.16175	0.331546	0.53381	0.41656	0.226354	0.183815	0.355773	0.119178	0.233483	0.373387	0.285444	0.140529	0.284062	0.264624	0.329629	0.178962	0.274487	0.210145	0.273183	0.262354	0.24697	0.180814	0.312858	0.184801	0.216869	0.167717	0.129935	0.24529	0.343663	0.32205	0.401984	0.18884	0.117295	0.164976	0.259354	0.519483	0.337159	0.437533
0	0.106834	0.0671388	0.02743	0.440678	0.296166	0.0997176	0.270933	0.238738	0.14797	0.0490377	0.446543	0.194578	0.320266	0.29857	0.328487	0.260748	0.167372	0.346466	0.0720085	0.258703	0.307096	0.312662	0.197189	0.405771	0.254589	0.334655	0.287876	0.312536	0.375651	0.327944	0.212282	0.333053	0.218216	0.190599	0.153726	0.227344	0.096161	0.0554069	0.138055	0.303161	0.347992	0.348304	0.139929	0.392678	0.230978	0.253593	0.285305	0.310305	0.303011
0	0.291289	0.145776	0.122215	0.847716	0.706201	0.248436	0.611546	0.452416	0.122407	0.0547693	0.696978	0.412924	0.636711	0.383133	0.719309	0.458571	0.377112	0.56008	0.182846	0.496828	0.562681	0.63998	0.34026	0.645388	0.583896	0.790138	0.646175	0.733769	0.749647	0.511102	0.461818	0.579107	0.691683	0.400403	0.317937	0.51541	0.232083	0.188108	0.396407	0.545698	0.623949	0.451228	0.23828	0.333524	0.265601	0.374688	0.389054	0.46633	0.508679
0	0.288976	0.224644	0.0433474	0.748997	1	0.271815	0.663346	0.551933	0.15219	0.0715377	0.688084	0.475155	0.624062	0.531882	0.638755	0.539084	0.362021	0.520656	0.152973	0.470718	0.575871	0.745065	0.269099	1	0.476749	0.600085	0.63733	0.54814	0.731514	0.515894	0.463533	0.484091	0.399551	0.414523	0.27137	0.411182	0.23968	0.189637	0.381738	0.53873	0.517034	0.547259	0.200548	0.175453	0.26625	0.380983	0.623497	0.49373	0.490785
0	0.116554	0.0169	0.0517218	0.201583	0.193738	0.123608	0.11191	0.178968	0.342592	0.065098	0.141567	0.159216	0.352615	0.537153	0.324268	0.182306	0.473801	0.124324	0.777555	0.453138	0.40246	0.215041	0.159963	0.0876694	0.169275	0.301257	0.248791	0.538163	0.0980567	0.322	0.649571	0.857546	0.183066	0.222431	0.0351986	0.0938207	0.617822	0.613529	0.541743	0.378177	0.154261	0.313655	0.0996503	0.0586207	0.0316512	0.0822616	0.245592	0.681686	0.261419
0	0.104857	0.0402775	0.0200429	0.304125	0.244179	0.223872	0.310488	0.205639	0.185173	0.0361007	0.494067	0.168981	0.310302	0.438111	0.373219	0.241325	0.178618	0.385637	0.142267	0.283371	0.374951	0.291758	0.113846	0.216688	0.25174	0.293719	0.202117	0.303324	0.235826	0.270565	0.229205	0.238658	0.197548	0.335929	0.1791	0.212755	0.171984	0.123904	0.229129	0.340139	0.34575	0.360143	0.190175	0.129477	0.146104	0.322319	0.513554	0.364292	0.335678
0	0.239069	0.113039	0.0629567	0.369167	0.64228	0.256112	0.577175	0.415862	0.147954	0.106168	0.824421	0.347126	0.547427	0.465462	0.619835	0.515244	0.385809	0.378757	0.226862	0.485386	0.64128	0.503518	0.169411	0.244701	0.379603	0.615342	0.38951	0.462471	0.430083	0.401444	0.377388	0.445995	0.556361	0.578742	0.329115	0.419993	0.312835	0.241534	0.49266	0.700574	0.557901	0.536769	0.284618	0.251516	0.259825	0.376533	0.651417	0.656842	0.518897
0	0.179712	0.0800605	0.0402953	0.371599	0.505937	0.250765	0.48467	0.439749	0.131948	0.0576446	0.734203	0.379218	0.470172	0.520703	0.742664	0.535685	0.366376	0.637968	0.405539	0.61293	0.883434	0.498829	0.13924	0.260106	0.376117	0.468855	0.381263	0.568236	0.411832	0.577482	0.461675	0.535733	0.299248	0.86701	0.193712	0.285423	0.24264	0.142578	0.356531	0.676312	0.762356	0.699195	0.360178	0.17194	0.274094	0.54279	0.90215	0.736878	0.341343
0	0.149552	0.0296539	0.0203546	0.186272	0.16516	0.0678863	0.100345	0.166527	0.0280603	0.0351971	0.149548	0.113487	0.296075	0.24906	0.19538	0.112244	0.255464	0.0891436	0.354401	0.222208	0.219084	0.136342	0.0831986	0.073171	0.209538	0.277472	0.269758	0.374473	0.164387	0.18867	0.341526	0.306462	0.128746	0.145575	0.0381021	0.0856864	0.293672	0.35391	0.316871	0.213721	0.122648	0.196769	0.100051	0.0448556	0.0546618	0.047222	0.210277	0.294139	0.302963
0	0.194082	0.0272323	0.064065	0.0720608	0.0890297	0.0533642	0.0720992	0.0901516	0.0294177	0.0714815	0.0895088	0.0676095	0.219307	0.126174	0.0908863	0.123861	0.23945	0.0381054	0.152804	0.177359	0.14257	0.0756504	0.0580247	0.0306357	0.152869	0.226114	0.0975586	0.185805	0.0421023	0.136977	0.169752	0.197598	0.102332	0.285485	0.0504234	0.0708457	0.227767	0.23673	0.228822	0.114422	0.103748	0.127423	0.304077	0.159118	0.0849765	0.0374542	0.0933321	0.112871	0.327659
0	0.196822	0.0561432	0.025243	0.245493	0.348795	0.102299	0.192018	0.245559	0.0571154	0.0422607	0.198619	0.165741	0.320952	0.262524	0.315241	0.227067	0.382383	0.135876	0.458222	0.299362	0.290989	0.252938	0.090601	0.143715	0.215736	0.352361	0.360421	0.386759	0.260154	0.240773	0.401382	0.421458	0.182158	0.240081	0.0629595	0.122573	0.560739	0.564482	0.651762	0.394721	0.192973	0.250368	0.0993959	0.0364429	0.0711268	0.0959777	0.318668	0.493854	0.366493
0	0.127977	0.0267001	0.0278763	0.271788	0.28255	0.107898	0.245693	0.180277	0.109402	0.0482348	0.246221	0.175179	0.297895	0.229036	0.253206	0.249659	0.374263	0.135329	0.374738	0.270886	0.27514	0.281198	0.0991351	0.123746	0.201454	0.354017	0.270849	0.300431	0.170976	0.223299	0.270331	0.430287	0.290159	0.236011	0.0789495	0.152016	0.566367	0.465321	0.525423	0.307306	0.19294	0.280907	0.131502	0.0756798	0.0908559	0.0913355	0.210782	0.411904	0.338353
0	0.11354	0.0257841	0.0408199	0.246966	0.283517	0.0785342	0.14372	0.227957	0.120185	0.0520827	0.129279	0.176926	0.361966	0.444519	0.300475	0.193805	0.475238	0.134234	0.702235	0.392106	0.421841	0.274453	0.115369	0.107918	0.166871	0.274032	0.408154	0.544198	0.151026	0.324138	0.681499	0.796515	0.153451	0.226113	0.0292143	0.105808	0.709153	0.609308	0.590359	0.421399	0.13916	0.383355	0.0498247	0.0259357	0.0363142	0.0688866	0.22027	0.52283	0.184046
0	0.134678	0.0283218	0.0327069	0.222767	0.201416	0.112509	0.136546	0.182906	0.0607378	0.0624638	0.122763	0.132386	0.382548	0.394989	0.209487	0.184053	0.295088	0.092706	0.436836	0.302104	0.254091	0.154616	0.106136	0.0995558	0.198259	0.308419	0.329085	0.461213	0.162659	0.235778	0.444014	0.412756	0.200804	0.181639	0.0465213	0.0996031	0.354286	0.466754	0.397931	0.234327	0.130596	0.206622	0.0863733	0.042687	0.0628978	0.0509006	0.286468	0.311778	0.333265
0	0.0867747	0.000650303	0.00370474	0.0635613	0.0722224	0.00496454	0.131432	0.000814055	0.000767291	0.000365303	0.0214908	0.41294	0.0197324	0.0019683	0.0693693	0.0865753	0.00614385	0.35647	0.00316893	0.022785	0.0159187	0.604852	0.12723	0.00279041	0.050594	0.0110212	0.0433303	0.0427229	0.00387629	0.0147005	0.00754642	0.0169522	0.010665	0.00952131	0.00473185	0.224348	0.0389814	0.0012993	0.0665241	0.315862	0.00304639	0.011077	0.000169804	0.0062831	0.184512	0.0074208	9.60519e-05	0.16087	0.00590508
0	0.246071	0.110211	0.0285618	0.371921	0.504808	0.152433	0.46417	0.404732	0.155271	0.0457606	0.489059	0.30421	0.357399	0.209803	0.6719	0.332337	0.338959	0.340969	0.128394	0.289663	0.381633	0.537508	0.169202	0.242701	0.381506	0.610741	0.363296	0.310585	0.366775	0.220495	0.32482	0.394035	0.467018	0.378469	0.215399	0.30782	0.272032	0.191828	0.370551	0.469005	0.338591	0.295196	0.0883306	0.0607826	0.15204	0.317266	0.199988	0.561861	0.325683
0	0.119794	0.0245264	0.0408088	0.180232	0.229815	0.147391	0.162566	0.231512	0.126902	0.0785943	0.182998	0.146626	0.341055	0.31027	0.276215	0.168725	0.339812	0.0973918	0.392811	0.253563	0.292346	0.254275	0.0759679	0.0718192	0.191291	0.323902	0.201797	0.28498	0.126936	0.232434	0.350525	0.408743	0.267788	0.320761	0.0801889	0.133349	0.593196	0.497549	0.618883	0.400784	0.161434	0.287138	0.157086	0.108879	0.0550314	0.0899306	0.320203	0.5478	0.451949
0	0.141296	0.0948129	0.04473	0.80977	0.445683	0.349306	0.503922	0.569365	0.369421	0.0863515	0.706266	0.369835	0.726403	0.524336	0.824621	0.625654	0.26116	0.826451	0.237742	0.607623	0.657029	0.563794	0.228633	0.267908	0.684611	0.71275	0.447605	0.602296	0.569711	0.571136	0.357326	0.479841	0.647652	0.551463	0.346413	0.405129	0.171097	0.125182	0.223172	0.396967	0.875792	0.589195	0.601531	0.0952931	0.384837	0.700998	0.680242	0.509511	0.592173
0	0.162386	0.00482275	0.00686412	0.13318	0.0405799	0.00517135	0.0606621	0.0187517	0.039459	0.00132023	0.0663793	0.294016	0.0564138	0.00220818	0.0812653	0.126879	0.0243472	0.795628	0.00988333	0.0460923	0.0733014	0.505633	0.324352	0.000216068	0.273275	0.0231968	0.0182813	0.0592973	0.000553152	0.0145914	0.0156936	0.0207696	0.0584369	0.0110422	0.0481849	0.630987	0.0759167	0.00659284	0.15023	0.244256	0.00867052	0.0432479	0.000191955	0.0122662	0.152668	0.0167725	4.95111e-05	0.069588	0.00378833
0	0.21261	0.112345	0.0661177	0.415973	0.478284	0.256915	0.563106	0.363873	0.156512	0.121063	0.849746	0.35166	0.512635	0.541086	0.559664	0.563037	0.31624	0.399641	0.170218	0.423476	0.564621	0.491172	0.226779	0.311134	0.362893	0.632189	0.30623	0.390567	0.36237	0.3906	0.326347	0.402113	0.690686	0.496561	0.264852	0.371529	0.272753	0.201702	0.42561	0.650418	0.681438	0.511882	0.361002	0.215531	0.35154	0.48142	0.695204	0.546693	0.59392
0	0.0925904	0.0356331	0.035899	0.160945	0.241821	0.0992535	0.144166	0.235256	0.0837286	0.0599234	0.14879	0.183079	0.414865	0.586304	0.23478	0.211256	0.377214	0.0929403	0.60102	0.348342	0.32864	0.189284	0.0791513	0.10437	0.203914	0.229144	0.36642	0.486653	0.153063	0.263693	0.5139	0.508035	0.193916	0.237182	0.0374548	0.0860828	0.457495	0.480566	0.508524	0.337222	0.151672	0.245613	0.0834017	0.0476763	0.0501207	0.0719112	0.362462	0.500869	0.174449
0	0.15245	0.0316279	0.0215619	0.200775	0.21556	0.0772779	0.108364	0.171531	0.0366885	0.0363888	0.15891	0.117062	0.30807	0.256626	0.197525	0.13027	0.284314	0.0865836	0.372271	0.236506	0.232686	0.154892	0.0774012	0.0779139	0.193869	0.281329	0.294879	0.368001	0.175133	0.201499	0.345748	0.342668	0.135675	0.15777	0.038442	0.0880189	0.35834	0.405257	0.358834	0.228662	0.127104	0.214973	0.0918652	0.0407745	0.0531728	0.0520123	0.223601	0.331694	0.294262
0	0.220055	0.0367364	0.0381052	0.257028	0.195543	0.12655	0.153822	0.161135	0.113587	0.0631641	0.198969	0.129784	0.243581	0.202845	0.215108	0.240066	0.278221	0.135072	0.283358	0.295488	0.259054	0.224179	0.103524	0.0795041	0.18077	0.335729	0.173182	0.443095	0.122368	0.221227	0.239315	0.372171	0.177257	0.24434	0.0571448	0.108224	0.487095	0.423021	0.437084	0.234856	0.20424	0.2262	0.183027	0.0837521	0.0655174	0.0877519	0.176023	0.423823	0.320932
0	0.216249	0.0893605	0.0510689	0.353664	0.539705	0.251995	0.529976	0.414177	0.13635	0.0835939	0.772222	0.352104	0.495528	0.481336	0.63583	0.51098	0.350943	0.455698	0.261935	0.507614	0.705362	0.507043	0.160091	0.27539	0.351873	0.514115	0.357311	0.510078	0.395978	0.425256	0.392385	0.437818	0.467801	0.619972	0.281298	0.382545	0.283096	0.194746	0.436335	0.660216	0.631587	0.569354	0.302039	0.226756	0.263445	0.401001	0.725016	0.637184	0.419074
0	0.105651	0.0345729	0.0228433	0.280276	0.216475	0.303444	0.295406	0.198004	0.168679	0.0380754	0.49053	0.165113	0.309149	0.470813	0.406272	0.226905	0.179651	0.363497	0.137938	0.251313	0.373216	0.260459	0.131194	0.256679	0.271691	0.337875	0.169296	0.28693	0.198944	0.264346	0.244002	0.319714	0.19069	0.306819	0.181821	0.207276	0.17066	0.125001	0.230747	0.320765	0.366903	0.382725	0.226274	0.19462	0.161083	0.278531	0.433647	0.332418	0.409494
0	0.288539	0.145408	0.0686163	0.681125	0.90216	0.278918	0.573165	0.520502	0.185172	0.118316	0.671178	0.334689	0.736215	0.538921	0.772017	0.509329	0.516083	0.405407	0.299745	0.625585	0.679864	0.433128	0.232814	0.328731	0.539197	0.87248	0.670574	0.687983	0.512004	0.532006	0.613909	0.63091	0.604833	0.621494	0.312246	0.341312	0.213643	0.284374	0.474141	0.60414	0.515892	0.566424	0.21852	0.175297	0.16854	0.366684	0.706607	0.734286	0.70112
0	0.317492	0.135969	0.0680985	0.638419	0.832144	0.31922	0.610348	0.507383	0.178169	0.115392	0.676459	0.330773	0.68712	0.470022	0.770918	0.556364	0.450255	0.376772	0.236351	0.555887	0.5873	0.573696	0.235373	0.353331	0.553469	0.787669	0.532463	0.610222	0.566458	0.482657	0.512741	0.551987	0.522501	0.528108	0.298419	0.355596	0.303186	0.314681	0.493104	0.544412	0.536986	0.498937	0.278487	0.152018	0.232277	0.415207	0.60841	0.69654	0.776629
0	0.216003	0.0493781	0.0755115	0.228684	0.100309	0.124131	0.17579	0.280286	0.0553871	0.104188	0.241028	0.138147	0.256816	0.32575	0.164738	0.274054	0.1458	0.384645	0.0949199	0.39198	0.376842	0.208699	0.227709	0.159107	0.427714	0.224432	0.0887273	0.447204	0.108843	0.586153	0.212033	0.479578	0.231797	0.15451	0.141236	0.229689	0.094333	0.0531964	0.107092	0.237223	0.437023	0.490515	0.527224	0.16624	0.310477	0.494726	0.239964	0.16775	0.224623
0	0.245809	0.157677	0.0403895	0.982172	0.718503	0.229204	0.87184	0.438196	0.0950299	0.0570115	0.814893	0.461488	0.576807	0.688487	0.683755	0.565808	0.390355	0.917716	0.26059	0.697838	0.919057	0.847697	0.344502	0.242442	0.499645	0.575363	0.608386	0.69825	0.743355	0.907659	0.601736	0.687197	0.446813	0.527851	0.29557	0.414842	0.320058	0.20428	0.459512	0.812834	0.68238	0.902695	0.247984	0.241353	0.295907	0.431114	0.91297	0.566789	0.518384
0	0.0755559	0.00139154	0.00142859	0.0625699	0.0901277	0.00104294	0.368149	0.00218201	0.0113861	0.000487801	0.0436116	0.36633	0.00517737	0.000771256	0.0703634	0.105895	0.00433976	0.224925	0.000371901	0.00829374	0.0300437	0.782731	0.0580221	0.00205698	0.0369809	0.0177151	0.0245895	0.0133905	0.00346678	0.00165203	0.002834	0.00307502	0.00909271	0.00953508	0.0160155	0.23961	0.0409912	0.000395631	0.0447582	0.339073	0.00660144	0.0133987	0.000870073	0.00776818	0.252263	0.0259009	0.0002515	0.183424	0.00906087
0	0.104768	0.054227	0.0278997	0.374492	0.26283	0.133119	0.241118	0.229489	0.171244	0.0514146	0.425208	0.176211	0.310897	0.27881	0.321279	0.258831	0.156079	0.309527	0.0680686	0.230839	0.285643	0.274698	0.175709	0.318487	0.254128	0.326256	0.243575	0.29291	0.30856	0.274218	0.191649	0.289978	0.225802	0.208836	0.144577	0.217782	0.0908569	0.0521141	0.130172	0.271923	0.326103	0.312019	0.135492	0.321767	0.211743	0.235091	0.248599	0.312785	0.280065
0	0.187638	0.124773	0.0739202	0.648318	0.520924	0.206211	0.421867	0.509727	0.0874762	0.102075	0.703159	0.454069	0.574847	0.33403	0.649264	0.594683	0.319883	0.603631	0.182383	0.516792	0.533102	0.665115	0.269741	0.440152	0.517455	0.725039	0.444063	0.50066	0.458271	0.481899	0.321083	0.578207	0.813751	0.466929	0.380966	0.530829	0.229351	0.147367	0.303958	0.471327	0.61132	0.488265	0.213914	0.264137	0.350564	0.463485	0.398375	0.580599	0.372685
0	0.201289	0.0538063	0.0340214	0.302482	0.428622	0.124011	0.22837	0.238381	0.0720585	0.0674838	0.227539	0.184661	0.294847	0.221361	0.342637	0.196757	0.431177	0.149101	0.421183	0.253137	0.268114	0.288141	0.124591	0.170679	0.186849	0.493987	0.353473	0.395006	0.260739	0.203253	0.420091	0.448507	0.354653	0.255139	0.0972321	0.193824	0.678233	0.643276	0.690158	0.403484	0.202914	0.198243	0.0781574	0.0836686	0.0645617	0.0934747	0.2576	0.389937	0.377017
0	0.263102	0.119698	0.0713344	0.526939	0.811385	0.282001	0.574358	0.49708	0.194136	0.120612	0.711726	0.336378	0.680413	0.499038	0.736569	0.518199	0.471686	0.392619	0.278683	0.560907	0.64043	0.455175	0.204337	0.25353	0.506389	0.794997	0.518933	0.581795	0.544513	0.444995	0.496843	0.545943	0.564849	0.655476	0.305608	0.360411	0.244529	0.257602	0.462313	0.632094	0.512005	0.519236	0.245499	0.208145	0.193481	0.386534	0.635713	0.764316	0.655368
0	0.104685	0.0265014	0.0238547	0.255076	0.26023	0.0945735	0.218374	0.180067	0.0998295	0.0382365	0.249776	0.186576	0.280462	0.214044	0.249889	0.260718	0.378735	0.150531	0.430098	0.270382	0.286729	0.281188	0.0808444	0.106514	0.206489	0.326364	0.234643	0.222367	0.148779	0.231173	0.243072	0.463634	0.297307	0.227822	0.0797963	0.145188	0.591436	0.414377	0.482446	0.299012	0.17472	0.312595	0.138591	0.088589	0.0933549	0.0948561	0.160911	0.396518	0.333335
0	0.0586213	0.023238	0.0281974	0.26775	0.220901	0.200561	0.175424	0.203879	0.17772	0.0518224	0.335544	0.135637	0.273624	0.266012	0.356432	0.259887	0.155796	0.333384	0.139384	0.316576	0.246719	0.136542	0.156627	0.164687	0.290005	0.313125	0.161859	0.352404	0.279197	0.24338	0.205736	0.409617	0.35278	0.245713	0.170303	0.211299	0.0775416	0.0669681	0.126018	0.300349	0.421369	0.226779	0.177952	0.273727	0.135275	0.268177	0.218711	0.329976	0.246961
0	0.153584	0.0450044	0.0182709	0.304393	0.431136	0.143034	0.323835	0.175138	0.029937	0.0320017	0.379977	0.200133	0.149075	0.241242	0.256521	0.175314	0.134526	0.318281	0.053651	0.138368	0.271329	0.374134	0.112569	0.452491	0.18021	0.19411	0.182175	0.180976	0.253475	0.12169	0.156104	0.195922	0.110062	0.243301	0.099203	0.226447	0.129394	0.0606708	0.138474	0.314595	0.240607	0.280348	0.047194	0.183559	0.140837	0.210461	0.155057	0.206113	0.168153
0	0.311454	0.220358	0.0458212	0.843923	0.972653	0.252153	0.618227	0.515052	0.121891	0.081152	0.696299	0.409663	0.673076	0.573922	0.678083	0.508178	0.447721	0.472966	0.222729	0.595905	0.690338	0.58841	0.270599	0.774473	0.469266	0.730246	0.799174	0.69957	0.489162	0.629104	0.637169	0.619605	0.559069	0.410689	0.318976	0.388607	0.226867	0.267629	0.468184	0.576518	0.555168	0.643143	0.195183	0.154834	0.225373	0.335652	0.787248	0.491075	0.570876
0	0.137694	0.0231472	0.073873	0.308851	0.344215	0.135235	0.196279	0.199928	0.248401	0.102999	0.199739	0.170852	0.397113	0.655974	0.425998	0.270377	0.516046	0.158128	0.790195	0.560165	0.446167	0.226932	0.242599	0.218953	0.201005	0.467084	0.3353	0.646488	0.202888	0.422215	0.4979	0.648835	0.345152	0.250298	0.110315	0.149591	0.612513	0.816457	0.735677	0.548199	0.187368	0.325153	0.115654	0.0767143	0.0480734	0.133797	0.41112	0.710477	0.258477
0	0.098608	0.0213909	0.0261472	0.101035	0.21734	0.0794145	0.101713	0.190384	0.105566	0.039713	0.0747638	0.111631	0.338099	0.361492	0.160328	0.164045	0.300611	0.0608696	0.597582	0.195817	0.175803	0.142537	0.0608573	0.0588451	0.138419	0.212862	0.364577	0.275135	0.113954	0.124159	0.467021	0.42954	0.121912	0.188435	0.0163445	0.0671401	0.356914	0.387607	0.344746	0.3062	0.0895275	0.120979	0.049629	0.0318474	0.0275535	0.0364533	0.19883	0.359862	0.175265
0	0.129364	0.0360063	0.0177699	0.364475	0.275644	0.0804115	0.161051	0.248297	0.0690639	0.0323661	0.120418	0.155273	0.343507	0.29507	0.258365	0.193576	0.328201	0.202437	0.619764	0.482014	0.390588	0.237279	0.121273	0.127672	0.210677	0.302146	0.434226	0.538035	0.218466	0.281024	0.534018	0.572452	0.17347	0.221266	0.0459261	0.109073	0.367444	0.470358	0.429291	0.34427	0.150616	0.278991	0.0679579	0.0549892	0.0356592	0.0959174	0.273495	0.442937	0.187405
0	0.150754	0.0367611	0.017104	0.418555	0.301994	0.0876626	0.178794	0.263756	0.0658877	0.032983	0.136479	0.159827	0.364641	0.281928	0.278098	0.208776	0.352735	0.227065	0.663431	0.507982	0.403411	0.261117	0.131623	0.151062	0.23016	0.347417	0.451328	0.541255	0.258239	0.282112	0.551711	0.581109	0.186685	0.228077	0.0586228	0.114744	0.420683	0.549695	0.511814	0.356017	0.161558	0.292929	0.071539	0.0608152	0.0398705	0.105508	0.284115	0.486836	0.22254
0	0.197026	0.0611137	0.0392835	0.421123	0.494971	0.260725	0.463161	0.458243	0.146149	0.0600697	0.638738	0.354445	0.498496	0.523261	0.727862	0.508487	0.353032	0.576403	0.34574	0.585109	0.800688	0.484585	0.165701	0.319929	0.386474	0.476265	0.387431	0.642374	0.414822	0.490135	0.482281	0.488064	0.344871	0.732018	0.199668	0.294186	0.203629	0.138451	0.340156	0.570084	0.711904	0.610833	0.307141	0.166726	0.232362	0.447633	0.824699	0.676486	0.357304
0	0.144672	0.0538509	0.0194621	0.384572	0.436216	0.0909312	0.211275	0.284636	0.0483468	0.0341873	0.195162	0.228916	0.380847	0.307459	0.276924	0.2934	0.409735	0.160034	0.584378	0.383118	0.38152	0.324919	0.0953124	0.205847	0.239521	0.321537	0.510789	0.442036	0.375952	0.270369	0.426266	0.435394	0.209667	0.243465	0.0819395	0.12318	0.731806	0.614591	0.734885	0.426574	0.245444	0.291506	0.0956746	0.034592	0.0820445	0.124499	0.361113	0.537467	0.267631
0	0.289458	0.208225	0.0597662	0.769549	0.938836	0.266948	0.652562	0.531215	0.14599	0.0680468	0.689935	0.4622	0.626695	0.500915	0.655524	0.522323	0.365162	0.528863	0.159192	0.476154	0.573125	0.723188	0.283913	0.926176	0.499055	0.639651	0.639171	0.586785	0.735289	0.514897	0.463176	0.503871	0.460367	0.411583	0.281064	0.43288	0.238098	0.189319	0.384792	0.540181	0.539292	0.527267	0.208403	0.208361	0.266115	0.379673	0.574691	0.488026	0.49451
0	0.181145	0.0419447	0.0235189	0.198256	0.262131	0.10663	0.154974	0.19158	0.052982	0.0366047	0.214758	0.131702	0.253885	0.227628	0.3039	0.194679	0.344183	0.136904	0.399717	0.259721	0.236584	0.202208	0.0922272	0.140508	0.203717	0.333659	0.239297	0.34721	0.202067	0.252432	0.333523	0.409551	0.157048	0.210124	0.0645169	0.120878	0.598789	0.616225	0.653502	0.368467	0.225804	0.231013	0.155829	0.102141	0.0850316	0.092163	0.26613	0.419664	0.435928
0	0.290179	0.183636	0.0843548	0.800327	0.847238	0.259659	0.636412	0.500189	0.136704	0.0628189	0.692708	0.442798	0.630639	0.45454	0.680639	0.497221	0.369867	0.541154	0.168505	0.484294	0.569013	0.690426	0.306099	0.815618	0.53246	0.698904	0.641929	0.644658	0.740942	0.513403	0.462641	0.533495	0.551446	0.407181	0.295582	0.465376	0.23573	0.188842	0.389365	0.542353	0.572625	0.497328	0.220167	0.257643	0.265912	0.37771	0.501598	0.479483	0.500089
0	0.167369	0.0377543	0.0597688	0.245652	0.318228	0.125389	0.183478	0.250101	0.228787	0.0786143	0.164146	0.213628	0.464241	0.704849	0.371409	0.224975	0.56615	0.13737	0.500864	0.472091	0.464881	0.265063	0.166869	0.129487	0.22497	0.351749	0.424429	0.586364	0.178949	0.357992	0.8493	0.8572	0.210309	0.333987	0.0471113	0.114595	0.701687	0.728744	0.70524	0.571771	0.186495	0.352795	0.096827	0.0544679	0.0393124	0.106401	0.454895	0.882713	0.294835
0	0.199102	0.096605	0.0319009	0.568015	0.585508	0.169228	0.436099	0.413577	0.210635	0.054728	0.512738	0.273197	0.492981	0.48302	0.65365	0.375905	0.266511	0.80802	0.30868	0.589284	0.686531	0.455817	0.185241	0.313941	0.38344	0.454096	0.397966	0.539725	0.443279	0.484156	0.368894	0.394022	0.262893	0.620741	0.200196	0.259575	0.142283	0.113865	0.232345	0.38365	0.459626	0.515707	0.19876	0.210637	0.178096	0.40419	0.734402	0.423766	0.263796
0	0.166655	0.0491409	0.0403764	0.32783	0.402866	0.112567	0.251023	0.235565	0.0687967	0.0566455	0.24882	0.223687	0.380385	0.46574	0.377997	0.225384	0.490733	0.168374	0.403273	0.369945	0.445649	0.354072	0.115581	0.167442	0.206968	0.360188	0.409535	0.419808	0.265749	0.305094	0.603354	0.603006	0.182543	0.335307	0.0710135	0.135532	0.920298	0.733298	0.825889	0.582192	0.214445	0.346177	0.106966	0.0504125	0.0655105	0.127548	0.397272	0.791528	0.389176
0	0.203632	0.132424	0.046373	0.712124	0.498365	0.201147	0.421564	0.404109	0.0992261	0.102323	0.61667	0.319922	0.506899	0.357822	0.428847	0.490915	0.278725	0.438828	0.116191	0.439054	0.403525	0.50809	0.315409	0.636083	0.4132	0.543195	0.55238	0.577917	0.591344	0.423725	0.363751	0.501367	0.683365	0.314679	0.313113	0.435317	0.182402	0.145459	0.286892	0.434521	0.515747	0.375298	0.159504	0.132122	0.235775	0.378463	0.436402	0.424039	0.283368
0	0.156224	0.0467463	0.0186003	0.317493	0.417889	0.143734	0.317692	0.169392	0.0255034	0.0322717	0.375834	0.194507	0.150887	0.249534	0.253157	0.174827	0.133961	0.354096	0.0567939	0.160597	0.274141	0.373208	0.121531	0.463752	0.178877	0.19321	0.179282	0.206401	0.24751	0.140989	0.166945	0.206187	0.111199	0.235932	0.101353	0.225811	0.129039	0.0637876	0.139779	0.308198	0.243888	0.281087	0.0500635	0.20034	0.144019	0.21219	0.173427	0.203792	0.178377
0	0.154565	0.0327377	0.0223482	0.209065	0.242543	0.0827063	0.113075	0.174184	0.0420088	0.0372487	0.164304	0.119117	0.313963	0.260242	0.198837	0.140875	0.29982	0.0856405	0.381212	0.244756	0.240304	0.165499	0.0744464	0.0804814	0.185335	0.28379	0.307454	0.365089	0.180522	0.208549	0.347112	0.362412	0.139692	0.165128	0.0387701	0.0894194	0.394291	0.433019	0.382125	0.236782	0.130148	0.22489	0.0881644	0.0389259	0.0524687	0.0549034	0.23035	0.352741	0.289707
0	0.16912	0.133766	0.0369797	0.375663	0.624626	0.195438	0.505774	0.367621	0.0371591	0.0639166	0.555759	0.323844	0.544988	0.499844	0.415557	0.634089	0.305206	0.385807	0.180974	0.408481	0.498122	0.394987	0.135778	0.416004	0.368848	0.36193	0.580903	0.588293	0.650779	0.524425	0.49163	0.401932	0.328954	0.394717	0.171148	0.313521	0.128439	0.113557	0.281793	0.682631	0.516763	0.523379	0.231909	0.204158	0.23766	0.243345	0.925853	0.335211	0.326784
0	0.187463	0.0379109	0.023164	0.194139	0.384123	0.108725	0.136898	0.21505	0.0432977	0.0409645	0.143672	0.115849	0.288055	0.230453	0.271436	0.155733	0.336448	0.101453	0.427045	0.239352	0.253624	0.200366	0.0765148	0.0846019	0.139087	0.344757	0.279727	0.283173	0.161458	0.183812	0.433905	0.391943	0.163513	0.199817	0.040891	0.105865	0.499305	0.613516	0.514838	0.29794	0.121998	0.221709	0.0591257	0.0589189	0.0457846	0.0612067	0.212362	0.41227	0.340538
0	0.146013	0.0271614	0.0308248	0.282349	0.294455	0.117066	0.260794	0.179988	0.116013	0.0552186	0.24261	0.166497	0.307374	0.237871	0.25427	0.242299	0.368517	0.125629	0.336034	0.2723	0.267445	0.279741	0.11101	0.133612	0.19757	0.371271	0.29148	0.355478	0.184019	0.218067	0.286859	0.406895	0.281901	0.242007	0.0777219	0.155064	0.548102	0.497092	0.551	0.310598	0.205266	0.25874	0.1284	0.0675591	0.0884558	0.0890492	0.241983	0.422665	0.340768
0	0.159706	0.0641193	0.025336	0.486407	0.281497	0.151268	0.321576	0.140058	0.0258761	0.0455107	0.326911	0.15065	0.24948	0.318653	0.261627	0.200948	0.147328	0.560635	0.109133	0.355475	0.326336	0.321179	0.200668	0.446686	0.191752	0.255508	0.226731	0.439273	0.269251	0.380239	0.270217	0.299777	0.170469	0.203029	0.130238	0.209293	0.106119	0.081368	0.14577	0.227212	0.320674	0.302579	0.104879	0.369049	0.169103	0.200792	0.402334	0.210901	0.290973
0	0.148931	0.03216	0.0186548	0.408235	0.273623	0.0854466	0.168193	0.255431	0.0695755	0.0343104	0.123425	0.145685	0.360521	0.288735	0.27839	0.188336	0.351515	0.23099	0.678159	0.519555	0.40792	0.248495	0.135837	0.13416	0.220568	0.344871	0.4361	0.560155	0.222278	0.287812	0.588472	0.629449	0.177252	0.223964	0.0502139	0.111946	0.382089	0.540715	0.469648	0.345539	0.140011	0.302675	0.0629723	0.0621527	0.0303824	0.0968664	0.26	0.474322	0.208026
0	0.272173	0.0906316	0.0719653	0.499499	0.467269	0.403078	0.434318	0.57085	0.366148	0.107985	0.665952	0.468918	0.753347	0.484088	0.727762	0.664077	0.372764	0.764251	0.362997	0.626176	0.92124	0.59832	0.233821	0.256416	0.65617	0.607339	0.512605	0.50207	0.407146	0.447477	0.387501	0.534767	0.41294	0.928828	0.194336	0.306205	0.295876	0.164237	0.37464	0.609048	0.663461	0.650066	0.329984	0.185029	0.279087	0.453708	0.521789	0.725695	0.418277
0	0.267873	0.141023	0.0852907	0.916633	0.716358	0.231944	0.754388	0.439075	0.0998715	0.0553982	0.761841	0.441828	0.596588	0.550235	0.706319	0.502563	0.388823	0.759167	0.225759	0.594124	0.758805	0.739109	0.344996	0.424621	0.547273	0.682131	0.628897	0.72143	0.7604	0.732355	0.543003	0.643351	0.573872	0.461635	0.303473	0.469599	0.27156	0.190573	0.428268	0.699549	0.664694	0.699577	0.244956	0.303642	0.276919	0.40471	0.66554	0.511277	0.513698
0	0.111788	0.0276521	0.038075	0.165565	0.226708	0.136698	0.154672	0.223233	0.111939	0.0711141	0.153352	0.138472	0.353061	0.429514	0.24664	0.161458	0.311393	0.0896707	0.428605	0.270511	0.282928	0.213966	0.074269	0.0849781	0.19263	0.272275	0.242889	0.410637	0.134475	0.225581	0.430433	0.411536	0.228993	0.296133	0.059972	0.110148	0.484314	0.465281	0.546136	0.361071	0.15163	0.232075	0.124646	0.0746315	0.052062	0.076959	0.369191	0.472708	0.34408
0	0.149616	0.0707976	0.0267621	0.558406	0.32474	0.135014	0.421211	0.158782	0.0246441	0.0510352	0.318605	0.175658	0.304548	0.3133	0.293156	0.215652	0.168633	0.450923	0.132314	0.338323	0.362847	0.319973	0.194616	0.399678	0.202123	0.305074	0.316806	0.42156	0.377092	0.439827	0.276675	0.301889	0.191308	0.237441	0.134785	0.20572	0.0972396	0.073179	0.145752	0.232588	0.362823	0.332017	0.117268	0.392653	0.159854	0.177386	0.463278	0.215912	0.297654
0	0.0956492	0.0341479	0.0354613	0.169358	0.201925	0.0859649	0.119207	0.209344	0.135354	0.0525868	0.114952	0.140162	0.408121	0.383387	0.179601	0.183753	0.253562	0.0774663	0.333321	0.233423	0.226552	0.188657	0.111369	0.075307	0.187498	0.196776	0.329345	0.376808	0.119898	0.235621	0.392792	0.437531	0.15867	0.194547	0.0249025	0.0896294	0.27238	0.248969	0.287295	0.289714	0.117061	0.205716	0.0654581	0.0376464	0.0542597	0.0449435	0.238127	0.350608	0.23586
0	0.170354	0.0887233	0.0544755	0.409611	0.493829	0.253854	0.526819	0.32808	0.102992	0.0957188	0.833908	0.323011	0.449758	0.455563	0.54177	0.432194	0.332164	0.336498	0.160583	0.460898	0.572049	0.472712	0.183939	0.285103	0.317915	0.52657	0.293478	0.452791	0.34043	0.447144	0.314232	0.483365	0.537041	0.466906	0.327436	0.391637	0.301319	0.195308	0.401892	0.605608	0.676615	0.555313	0.367284	0.238075	0.270284	0.398005	0.622693	0.546699	0.465952
0	0.1996	0.0813178	0.0485348	0.453677	0.564117	0.226261	0.479203	0.545427	0.218146	0.0678494	0.621088	0.447888	0.539114	0.443242	0.736408	0.615995	0.377006	0.649117	0.320585	0.583504	0.854671	0.591781	0.190221	0.380531	0.483403	0.549402	0.532121	0.567206	0.466023	0.453308	0.445042	0.619378	0.373105	0.768985	0.211945	0.324589	0.294701	0.145651	0.381051	0.656471	0.686956	0.63104	0.262421	0.156101	0.243889	0.462751	0.626051	0.699416	0.356279
0	0.329671	0.13968	0.0661249	0.649561	0.816424	0.326352	0.620791	0.499926	0.167813	0.11209	0.68093	0.330572	0.672063	0.457616	0.765676	0.566681	0.433313	0.370567	0.21789	0.544862	0.572521	0.613062	0.239621	0.38017	0.550513	0.762735	0.51977	0.60299	0.558033	0.487663	0.501981	0.540951	0.509554	0.482647	0.299398	0.361836	0.328321	0.328628	0.505596	0.528565	0.549831	0.495482	0.292713	0.141815	0.251597	0.421968	0.602759	0.663862	0.793225
0	0.149757	0.0478861	0.0532626	0.228039	0.347351	0.102206	0.190298	0.29265	0.093376	0.0770964	0.174531	0.247193	0.516938	0.722751	0.340014	0.258243	0.564338	0.124409	0.49448	0.445397	0.459295	0.265625	0.12821	0.134532	0.240375	0.322769	0.517402	0.526749	0.206632	0.353563	0.780015	0.733927	0.213458	0.327751	0.0478014	0.111659	0.686807	0.696589	0.723995	0.56692	0.186839	0.365256	0.0858252	0.0563053	0.0446824	0.103888	0.47295	0.848972	0.236594
0	0.26527	0.227284	0.0396602	0.926784	0.686995	0.282668	0.699904	0.485611	0.164682	0.05966	0.735945	0.413936	0.666142	0.489995	0.662469	0.596967	0.351098	0.662071	0.207519	0.654394	0.679842	0.812511	0.325169	0.506153	0.48931	0.649574	0.609594	0.672609	0.649983	0.620771	0.479089	0.581975	0.494831	0.503448	0.325378	0.416892	0.322372	0.237601	0.436835	0.586576	0.584192	0.600383	0.232301	0.160137	0.312365	0.400317	0.642581	0.570332	0.514084
0	0.158298	0.0790743	0.033297	0.550405	0.342342	0.158981	0.410431	0.220955	0.0566559	0.0592505	0.334282	0.21794	0.368332	0.295016	0.335991	0.316707	0.183996	0.423558	0.146642	0.336435	0.364867	0.34066	0.185437	0.361807	0.266678	0.363122	0.389484	0.421044	0.410771	0.418199	0.272231	0.308887	0.249003	0.273483	0.148815	0.218642	0.105139	0.0770029	0.154407	0.240729	0.39292	0.330457	0.147057	0.34678	0.176898	0.193441	0.439715	0.234805	0.335225
0	0.147556	0.0449139	0.0277791	0.347994	0.38534	0.110612	0.258364	0.192362	0.0529051	0.0417378	0.285185	0.201861	0.288762	0.270266	0.357615	0.208592	0.406912	0.174988	0.456501	0.308361	0.397257	0.37113	0.0910276	0.168261	0.17542	0.350353	0.313658	0.314263	0.271398	0.256992	0.37511	0.459743	0.166079	0.287425	0.07994	0.139077	0.968264	0.679549	0.806647	0.491917	0.218886	0.313138	0.119225	0.0532974	0.0772211	0.127952	0.282115	0.658356	0.430462
0	0.21211	0.150678	0.0627173	0.402525	0.746064	0.270134	0.52257	0.65884	0.528894	0.0896542	0.63769	0.500621	0.812758	0.446224	0.772241	0.636112	0.470018	0.452778	0.321132	0.489865	0.627834	0.646168	0.187726	0.298894	0.657227	0.781066	0.712409	0.596806	0.510514	0.487955	0.495144	0.875927	0.428958	0.730471	0.188557	0.333623	0.305217	0.199878	0.408046	0.643398	0.628901	0.599922	0.210481	0.0973549	0.246136	0.331122	0.379957	0.652121	0.492627
0	0.102166	0.0379623	0.0284913	0.291119	0.220836	0.175194	0.203561	0.217838	0.200562	0.0544086	0.398333	0.153075	0.299095	0.25392	0.312199	0.256415	0.141854	0.262995	0.0631056	0.195739	0.25862	0.226876	0.14865	0.208536	0.253547	0.315677	0.18777	0.268188	0.224047	0.20654	0.165659	0.235719	0.235358	0.231808	0.133051	0.205738	0.0841755	0.0479661	0.120243	0.232572	0.29853	0.266311	0.129903	0.232441	0.187513	0.211783	0.202362	0.315907	0.251161
0	0.267556	0.198274	0.0441788	0.751829	0.833329	0.242043	0.575257	0.511966	0.135854	0.0831993	0.648455	0.423608	0.592081	0.462812	0.559057	0.534856	0.330244	0.504211	0.140595	0.457239	0.508252	0.670421	0.293561	0.899024	0.463515	0.583017	0.6335	0.565317	0.707815	0.476002	0.434278	0.484307	0.511922	0.374418	0.285727	0.428156	0.213469	0.173752	0.348673	0.499549	0.493841	0.471332	0.162669	0.154397	0.254344	0.376094	0.546085	0.465249	0.403011
0	0.256802	0.158869	0.0353742	0.744086	0.667605	0.249171	0.402152	0.550523	0.144332	0.0582761	0.584517	0.407009	0.92138	0.413444	0.672237	0.598212	0.497722	0.557396	0.254358	0.61236	0.580631	0.559766	0.402349	0.542288	0.616349	0.817609	0.769376	0.800109	0.536166	0.623718	0.524593	0.798689	0.268371	0.46596	0.371647	0.562511	0.299465	0.275354	0.513422	0.715785	0.579659	0.580741	0.192807	0.325061	0.255614	0.302967	0.490941	0.551406	0.522732
0	0.244135	0.126122	0.0729951	0.566132	0.819765	0.231331	0.550548	0.622183	0.285321	0.10963	0.632897	0.472628	0.693647	0.406658	0.776489	0.66609	0.478616	0.578537	0.289362	0.590519	0.787891	0.604735	0.229701	0.364206	0.623483	0.809559	0.698516	0.529473	0.591139	0.42981	0.469112	0.733542	0.510964	0.76786	0.271571	0.358584	0.338437	0.222022	0.460864	0.71485	0.55247	0.586842	0.202309	0.164867	0.211027	0.441932	0.439781	0.79144	0.563592
0	0.2953	0.210202	0.0477934	0.827498	0.719792	0.309159	0.648984	0.495265	0.17299	0.0766834	0.706052	0.37762	0.676739	0.441592	0.692156	0.595822	0.366016	0.518305	0.195037	0.605495	0.59825	0.754342	0.294488	0.516865	0.507349	0.690394	0.574049	0.64176	0.599978	0.530479	0.4626	0.546388	0.502534	0.474232	0.32176	0.40091	0.334805	0.279693	0.461602	0.523515	0.561553	0.513835	0.256048	0.136555	0.301999	0.405382	0.582596	0.589825	0.615345
0	0.0595257	0.000465756	0.00197563	0.0472073	0.0705846	0.0028456	0.132872	0.000455548	0.000627254	0.000190681	0.0140232	0.312017	0.0118737	0.00109758	0.0550144	0.0650091	0.0034246	0.298955	0.00266555	0.0158084	0.00879403	0.518673	0.0764531	0.00187109	0.0347452	0.00589481	0.0362756	0.0296445	0.00313966	0.00829371	0.00425608	0.0102001	0.0059797	0.00618437	0.0026313	0.199543	0.0338877	0.00116409	0.0681882	0.368425	0.00165298	0.00579937	9.92345e-05	0.00323856	0.136734	0.00674992	0.000173305	0.173872	0.00299343
0	0.0711377	0.0115783	0.0154279	0.0771106	0.0680293	0.033552	0.0375489	0.101397	0.0432215	0.0246873	0.0440111	0.0484665	0.179415	0.069465	0.079196	0.0923642	0.109914	0.0757597	0.167003	0.105409	0.0901041	0.0601851	0.0299136	0.0296726	0.123997	0.155114	0.149433	0.147333	0.0625336	0.0808533	0.123257	0.201666	0.073643	0.0728016	0.0144124	0.0470351	0.0995851	0.105859	0.106233	0.106893	0.0629402	0.0947741	0.0423108	0.0276583	0.0488039	0.0254851	0.0422797	0.14016	0.170355
0	0.185578	0.0383868	0.0349989	0.290039	0.355459	0.127634	0.257639	0.203897	0.103355	0.0670467	0.230641	0.165351	0.307501	0.234065	0.292959	0.215697	0.389493	0.125461	0.339983	0.260547	0.25545	0.275787	0.127043	0.154868	0.189729	0.443944	0.331338	0.420251	0.222201	0.204675	0.354981	0.399424	0.306085	0.2539	0.0831607	0.173048	0.582457	0.582197	0.621642	0.344317	0.214379	0.209353	0.103831	0.0683543	0.0754719	0.0871932	0.26936	0.407933	0.357739
0	0.27716	0.072451	0.0740253	0.931281	0.46884	0.267813	0.724285	0.714537	0.205892	0.135638	0.745948	0.554118	0.929179	0.602621	0.760125	0.810455	0.596325	0.644202	0.350088	0.792546	0.928665	0.77359	0.330992	0.689371	0.667061	0.780019	0.557381	0.83235	0.926385	0.807949	0.727312	0.771472	0.766565	0.629646	0.331323	0.472793	0.384845	0.327218	0.685143	0.999887	0.725477	0.83323	0.173732	0.20499	0.269556	0.421713	0.903628	0.878116	0.482992
0	0.189154	0.0464557	0.051878	0.320389	0.442038	0.127004	0.239221	0.235714	0.0840257	0.088835	0.229982	0.183015	0.3337	0.37128	0.395974	0.241868	0.468492	0.159353	0.535023	0.362768	0.325935	0.266588	0.180005	0.218138	0.199685	0.540786	0.376114	0.501821	0.267195	0.292644	0.401392	0.440232	0.39629	0.263621	0.118752	0.195307	0.65683	0.74558	0.744672	0.483943	0.205176	0.236233	0.0888117	0.0863056	0.06278	0.116063	0.337173	0.46624	0.334779
0	0.185291	0.115791	0.077148	0.602586	0.322863	0.276121	0.537811	0.333667	0.202601	0.155756	0.81397	0.351765	0.546707	0.689779	0.540397	0.644398	0.260071	0.443872	0.111987	0.37287	0.436808	0.437303	0.346105	0.427486	0.422696	0.784188	0.257371	0.353615	0.328995	0.402672	0.324113	0.398291	0.919479	0.413147	0.141969	0.249957	0.159071	0.146689	0.293375	0.519897	0.854779	0.458474	0.460766	0.125865	0.45795	0.662402	0.757033	0.438086	0.812657
0	0.275585	0.142588	0.0974522	0.893934	0.713013	0.237376	0.707341	0.443469	0.107294	0.0551911	0.740477	0.432309	0.609803	0.495198	0.710597	0.488073	0.384966	0.693595	0.211625	0.562078	0.694208	0.706459	0.343436	0.497333	0.559335	0.717704	0.634588	0.725494	0.756858	0.659482	0.516264	0.622191	0.612675	0.441467	0.308237	0.484687	0.258558	0.189761	0.417774	0.648876	0.651274	0.61778	0.242757	0.313484	0.273191	0.394822	0.574475	0.496473	0.512045
0	0.184385	0.0342409	0.0282165	0.225835	0.212669	0.113907	0.144786	0.165749	0.0782579	0.0443575	0.216387	0.128513	0.228164	0.2081	0.259355	0.212258	0.306902	0.143566	0.348561	0.275524	0.241873	0.205514	0.0965234	0.124161	0.194134	0.320617	0.185808	0.378103	0.164746	0.248154	0.267874	0.391937	0.157328	0.21861	0.0651075	0.114635	0.600206	0.564329	0.583967	0.310552	0.240598	0.228557	0.189074	0.121655	0.0845921	0.0949539	0.212229	0.403389	0.399175
0	0.321926	0.205945	0.0473151	0.945928	0.918251	0.23004	0.617897	0.471465	0.0893998	0.0863553	0.721527	0.361258	0.699904	0.632837	0.713792	0.487337	0.51648	0.497813	0.290178	0.719126	0.828109	0.486457	0.281972	0.501197	0.467007	0.820747	0.915614	0.831871	0.314543	0.773977	0.788379	0.749973	0.681468	0.423074	0.356147	0.372229	0.227366	0.32601	0.543039	0.648168	0.608225	0.771213	0.197797	0.151096	0.198093	0.309551	0.956111	0.498144	0.633965
0	0.156848	0.0408762	0.0504406	0.271808	0.363872	0.091968	0.195163	0.274484	0.0839117	0.0668389	0.151425	0.217753	0.452872	0.609354	0.346216	0.226454	0.552114	0.142522	0.490721	0.424134	0.468925	0.300557	0.132963	0.137536	0.214101	0.323486	0.51286	0.582923	0.204662	0.353681	0.840127	0.812398	0.184089	0.318462	0.0407658	0.12001	0.755112	0.706812	0.714254	0.571902	0.170128	0.397629	0.0606655	0.0311224	0.0414877	0.0926248	0.402077	0.733097	0.232503
0	0.16597	0.0378934	0.0263501	0.248015	0.363504	0.108407	0.135622	0.185985	0.0682517	0.0418611	0.189788	0.128812	0.338576	0.274968	0.205276	0.191681	0.369537	0.0828726	0.419151	0.283777	0.275602	0.215349	0.0617097	0.0920871	0.146588	0.296176	0.360837	0.353926	0.203438	0.240776	0.350158	0.452142	0.158748	0.200945	0.0407396	0.0962158	0.55999	0.558394	0.489351	0.273598	0.146033	0.269938	0.0739014	0.0317874	0.0496297	0.0689785	0.25929	0.450302	0.269639
0	0.0698165	0.0300588	0.0179763	0.271094	0.218641	0.292181	0.257614	0.228433	0.205279	0.0349479	0.469212	0.177222	0.2679	0.302178	0.338171	0.249067	0.170157	0.410711	0.180239	0.332416	0.375427	0.258372	0.0879057	0.145651	0.256038	0.289054	0.198804	0.33478	0.231454	0.256508	0.187162	0.340533	0.219661	0.337849	0.172125	0.196905	0.17824	0.113937	0.200499	0.305224	0.42193	0.312753	0.245202	0.247513	0.131695	0.379386	0.386048	0.369981	0.247699
0	0.201966	0.0703429	0.0381287	0.466052	0.524363	0.243702	0.457317	0.458428	0.163264	0.0598173	0.605635	0.335441	0.507921	0.520769	0.726694	0.472742	0.33708	0.637219	0.341299	0.594867	0.784261	0.48173	0.173831	0.32293	0.394879	0.47713	0.397377	0.638482	0.427374	0.492489	0.467929	0.46977	0.332101	0.716227	0.200567	0.287985	0.18865	0.135129	0.32055	0.530775	0.657118	0.590766	0.278557	0.168546	0.216114	0.432768	0.813968	0.625345	0.336814
0	0.0832423	0.000586154	0.00355723	0.0368574	0.0504876	0.00140487	0.162271	0.00069572	0.00317051	0.000519361	0.0200524	0.240713	0.00902339	0.000888712	0.0517238	0.0721757	0.00325764	0.168796	0.00145496	0.00425996	0.01401	0.387189	0.0909166	0.00182206	0.0349775	0.0133048	0.0231177	0.0117644	0.00219345	0.00326728	0.00192271	0.00992973	0.00395491	0.00546262	0.00617459	0.183736	0.0412784	0.000610565	0.0422292	0.233299	0.00357925	0.0153043	0.000317473	0.00983621	0.304688	0.00968319	0.000121263	0.13726	0.0107072
0	0.198034	0.122531	0.0276145	0.46197	0.830624	0.17924	0.644772	0.387905	0.0401433	0.0455868	0.61467	0.373156	0.483916	0.60329	0.515581	0.483155	0.321588	0.447578	0.187232	0.432484	0.65325	0.601514	0.205055	0.77595	0.330243	0.402732	0.572073	0.451877	0.692144	0.431238	0.464358	0.366443	0.284368	0.404178	0.216008	0.302973	0.270493	0.186375	0.411132	0.683673	0.542285	0.603016	0.16482	0.171301	0.236777	0.327963	0.93019	0.456366	0.325137
0	0.153297	0.0282172	0.0248085	0.214291	0.170131	0.0825976	0.107214	0.166776	0.031218	0.0465778	0.13774	0.118764	0.33352	0.257696	0.200995	0.139601	0.271639	0.0904913	0.372215	0.251299	0.226422	0.137599	0.099758	0.0801145	0.206129	0.313668	0.299049	0.380652	0.168031	0.209658	0.361484	0.339238	0.156622	0.13945	0.04375	0.0943029	0.313255	0.407354	0.334757	0.204905	0.121605	0.209359	0.0958514	0.0472778	0.0592573	0.0451162	0.20759	0.288183	0.350972
0	0.174588	0.0367305	0.0593683	0.476864	0.461334	0.109271	0.259157	0.16742	0.0246153	0.100845	0.215505	0.200901	0.352908	0.389499	0.262324	0.291645	0.301479	0.214078	0.446475	0.473824	0.439482	0.257063	0.206752	0.290351	0.195733	0.332158	0.495394	0.693459	0.296596	0.488852	0.579114	0.935757	0.315908	0.17163	0.0817794	0.167348	0.475423	0.421732	0.459835	0.40573	0.259664	0.36081	0.114272	0.0832446	0.129899	0.104101	0.457731	0.29828	0.301564
0	0.163884	0.0514776	0.0281464	0.406827	0.447602	0.118313	0.266281	0.214302	0.0600524	0.0473709	0.281112	0.204735	0.313251	0.285429	0.346446	0.212346	0.419941	0.177193	0.42913	0.324176	0.388074	0.385686	0.104411	0.1916	0.179948	0.36107	0.361667	0.343117	0.308797	0.255552	0.41053	0.49219	0.237931	0.264782	0.100378	0.169008	0.884194	0.694308	0.836574	0.5194	0.216662	0.303378	0.108364	0.0576121	0.0788075	0.127362	0.320309	0.628279	0.411159
0	0.219506	0.0539456	0.0295703	0.244228	0.326352	0.10692	0.217753	0.228558	0.0485747	0.0453938	0.241053	0.160641	0.325739	0.2737	0.33383	0.214665	0.388516	0.141886	0.426946	0.307834	0.332426	0.265383	0.10649	0.126504	0.227668	0.366132	0.295517	0.41141	0.214951	0.2964	0.408773	0.471778	0.172889	0.269848	0.06034	0.133216	0.59417	0.580248	0.660226	0.396946	0.203127	0.317939	0.135817	0.0429478	0.0819855	0.0884734	0.353172	0.463855	0.553171
0	0.290466	0.173852	0.0941387	0.812573	0.810791	0.256759	0.629986	0.487843	0.133009	0.0607387	0.693812	0.435078	0.632208	0.436087	0.690632	0.487233	0.371739	0.546045	0.172211	0.487533	0.567376	0.677389	0.314927	0.771627	0.545752	0.722481	0.643026	0.667687	0.743191	0.512808	0.462429	0.545282	0.587687	0.40543	0.301359	0.478305	0.234788	0.188652	0.391185	0.543218	0.585888	0.485414	0.224848	0.277252	0.265832	0.376929	0.472514	0.476084	0.502309
0	0.21602	0.0754776	0.0732494	0.505583	0.46384	0.167979	0.482249	0.404219	0.0942583	0.115792	0.801431	0.37805	0.801745	0.919247	0.866989	0.636088	0.418444	0.711478	0.641114	0.749198	0.902752	0.413271	0.272574	0.391001	0.52813	0.701259	0.457694	0.718843	0.384947	0.628394	0.61311	0.722459	0.431976	0.772487	0.233899	0.301261	0.580349	0.456214	0.682024	0.765501	0.985642	0.705196	0.653696	0.55013	0.375831	0.426812	0.900698	0.76188	0.911054
0	0.235555	0.14836	0.0555865	0.768809	0.544192	0.194141	0.435766	0.438891	0.107387	0.0986239	0.589847	0.337873	0.545489	0.339515	0.44926	0.518113	0.284272	0.484491	0.125777	0.440277	0.404595	0.544342	0.339609	0.701113	0.457355	0.581751	0.628865	0.615116	0.674416	0.415235	0.389946	0.496866	0.71897	0.312129	0.31337	0.467168	0.172969	0.149601	0.300705	0.441366	0.472635	0.344484	0.110411	0.142998	0.236309	0.36791	0.399177	0.418777	0.272966
0	0.256344	0.0901293	0.0707397	0.648265	0.447439	0.426638	0.439435	0.60854	0.43087	0.114269	0.638645	0.452763	0.823979	0.488775	0.752743	0.677574	0.333803	0.802506	0.295574	0.61659	0.822362	0.608853	0.262831	0.273893	0.740158	0.68	0.526096	0.536683	0.461078	0.434177	0.363369	0.504519	0.531818	0.785516	0.246844	0.346787	0.258285	0.155724	0.324609	0.494902	0.696821	0.595539	0.400182	0.157089	0.305592	0.490394	0.45823	0.635753	0.500129
0	0.174074	0.0862305	0.0406248	0.355472	0.509508	0.247522	0.491674	0.433726	0.127323	0.0568549	0.765292	0.387285	0.460948	0.519869	0.747484	0.544542	0.370721	0.658016	0.425013	0.621989	0.91038	0.503467	0.130623	0.240624	0.372744	0.466442	0.379255	0.544093	0.410858	0.605926	0.454964	0.551257	0.284391	0.91097	0.191773	0.28257	0.255344	0.143923	0.361864	0.710905	0.778786	0.72797	0.377449	0.173637	0.287683	0.573778	0.927372	0.756544	0.336145
0	0.0867355	0.000641042	0.00371721	0.0626974	0.0712711	0.00485523	0.130475	0.000798717	0.000762366	0.000370012	0.0212126	0.406665	0.0194634	0.00193449	0.0686977	0.0858811	0.00603949	0.350578	0.00312596	0.0222072	0.0157151	0.595214	0.126353	0.00275563	0.0501034	0.0110435	0.0427455	0.0418076	0.00381642	0.0143668	0.00737633	0.0168026	0.0104543	0.00936137	0.00468059	0.222793	0.0389974	0.00127868	0.0657209	0.312284	0.00303267	0.0112051	0.000168712	0.00639875	0.18834	0.00733876	9.53958e-05	0.159717	0.00605617
0	0.068039	0.0319743	0.023292	0.295072	0.248355	0.147422	0.2222	0.212947	0.195582	0.0454955	0.382175	0.149343	0.281186	0.275698	0.330354	0.267278	0.160755	0.369452	0.14747	0.338391	0.285469	0.204579	0.12723	0.139603	0.262639	0.270168	0.200645	0.354844	0.296977	0.255126	0.196175	0.30201	0.315523	0.296415	0.169919	0.214781	0.106684	0.0816402	0.151884	0.324746	0.389025	0.242135	0.156624	0.188715	0.124534	0.325933	0.358899	0.367107	0.202678
0	0.157648	0.0433644	0.0237653	0.294538	0.391435	0.102132	0.161123	0.220129	0.060458	0.0388313	0.191377	0.163011	0.354901	0.287477	0.229595	0.225565	0.384908	0.108235	0.47815	0.317389	0.31198	0.252552	0.0725524	0.131274	0.177784	0.304249	0.415569	0.382534	0.263945	0.251294	0.378392	0.447815	0.175949	0.214472	0.0545592	0.105267	0.619886	0.580147	0.574207	0.326631	0.178947	0.278051	0.0794134	0.0317856	0.0604438	0.0875857	0.295785	0.480405	0.268209
0	0.101319	0.040089	0.0194428	0.304284	0.245619	0.219243	0.307462	0.208952	0.189482	0.0357073	0.492139	0.170336	0.30632	0.420173	0.365095	0.244132	0.177644	0.391235	0.146595	0.292722	0.375245	0.292942	0.108844	0.204059	0.249325	0.286987	0.206457	0.30873	0.24064	0.270075	0.222991	0.2371	0.200685	0.340254	0.178031	0.211984	0.172784	0.122774	0.226099	0.339478	0.350192	0.352301	0.190425	0.131761	0.142566	0.334122	0.512443	0.369378	0.316586
0	0.087525	0.000729782	0.00392184	0.0627258	0.0762561	0.00461013	0.137061	0.00135268	0.00204633	0.000362147	0.0213157	0.43217	0.0207126	0.00189258	0.0708808	0.0917183	0.00641305	0.356159	0.00329678	0.0245094	0.0202299	0.650803	0.121024	0.00327433	0.052755	0.0112423	0.0459527	0.0421609	0.00406328	0.0153164	0.00785813	0.0180814	0.0117924	0.00964929	0.00502074	0.228166	0.0458393	0.00142869	0.0742092	0.34888	0.00322979	0.0138108	0.000191913	0.00593817	0.176046	0.00918673	0.000106937	0.177622	0.00539502
0	0.0917623	0.0159681	0.0154801	0.121578	0.0971007	0.0459811	0.0593272	0.131848	0.0523158	0.0248078	0.0834869	0.0693999	0.189473	0.129663	0.129736	0.0853789	0.163547	0.102995	0.249144	0.161791	0.156687	0.0892006	0.0527161	0.0480717	0.166271	0.192705	0.183768	0.238532	0.101958	0.11381	0.202821	0.270993	0.0900899	0.112147	0.0207924	0.0575114	0.167751	0.184533	0.179023	0.158171	0.0767656	0.139535	0.0488472	0.0282809	0.0422327	0.0394607	0.0922639	0.217246	0.18949
0	0.154615	0.0455511	0.0180177	0.306763	0.436479	0.141381	0.327394	0.174605	0.0258372	0.0314232	0.380485	0.201718	0.146312	0.241728	0.255628	0.173766	0.134808	0.320971	0.0538759	0.138502	0.272562	0.378462	0.112328	0.459876	0.178702	0.191747	0.18357	0.18004	0.256286	0.121824	0.156599	0.196447	0.107279	0.243318	0.098909	0.227163	0.13071	0.0612028	0.139308	0.31748	0.240341	0.281851	0.045837	0.184572	0.140325	0.211534	0.156042	0.204062	0.167047
0	0.0930832	0.0472011	0.0205528	0.32804	0.270724	0.196502	0.290455	0.255298	0.21096	0.0396754	0.467811	0.200838	0.314846	0.292747	0.330553	0.312908	0.177803	0.425013	0.175868	0.35299	0.373374	0.315215	0.0865936	0.139418	0.265108	0.27948	0.27983	0.355941	0.296456	0.272252	0.191173	0.240463	0.248652	0.369276	0.17379	0.214381	0.172695	0.112597	0.202994	0.32578	0.391058	0.301058	0.198166	0.151147	0.134949	0.392625	0.480995	0.388824	0.224909
0	0.211738	0.149873	0.0630137	0.407337	0.745223	0.265074	0.522444	0.662282	0.522947	0.0894832	0.635954	0.507371	0.805295	0.438607	0.771679	0.645514	0.468573	0.467907	0.319125	0.49368	0.642578	0.654072	0.189957	0.307499	0.659182	0.778471	0.718593	0.588125	0.51348	0.483645	0.489507	0.878101	0.429055	0.736315	0.190615	0.336045	0.313544	0.198379	0.410876	0.652655	0.62923	0.603614	0.208731	0.0987737	0.247379	0.338452	0.371834	0.656552	0.486909
0	0.133558	0.0459035	0.0501448	0.210693	0.324112	0.0972931	0.175029	0.287276	0.0895415	0.0743989	0.173394	0.244457	0.507931	0.696591	0.3216	0.258312	0.543592	0.117138	0.556932	0.436551	0.442966	0.251681	0.117508	0.125838	0.232994	0.304536	0.498427	0.498018	0.194453	0.344274	0.713958	0.700287	0.210068	0.301369	0.0457363	0.105602	0.659125	0.662054	0.691369	0.520938	0.180734	0.3567	0.085831	0.0595294	0.0443732	0.0985959	0.43413	0.803621	0.216007
0	0.106571	0.0657884	0.0491537	0.527162	0.408875	0.262274	0.468839	0.272254	0.0747407	0.0911633	0.791598	0.293974	0.405352	0.458128	0.511015	0.346225	0.312365	0.30077	0.112403	0.469248	0.49598	0.420253	0.216364	0.334273	0.310722	0.51385	0.249086	0.495926	0.295421	0.516693	0.299229	0.570244	0.524167	0.380519	0.315977	0.335999	0.257034	0.15164	0.288138	0.469674	0.783659	0.566721	0.437057	0.204057	0.253113	0.427011	0.581426	0.476647	0.468332
0	0.0776608	0.0230752	0.0298989	0.245796	0.210885	0.161207	0.162062	0.200341	0.201577	0.0573158	0.327665	0.124402	0.284137	0.240322	0.326875	0.263266	0.139586	0.267165	0.0919964	0.246303	0.213666	0.142752	0.149084	0.125355	0.272732	0.299747	0.149116	0.307228	0.232402	0.192429	0.176015	0.281183	0.330009	0.242044	0.146475	0.208413	0.0573285	0.0471947	0.105255	0.256903	0.337739	0.201214	0.123758	0.18442	0.144127	0.218145	0.190148	0.327039	0.216845
0	0.082956	0.0189122	0.0265889	0.0964369	0.180147	0.0728897	0.0947192	0.180503	0.114078	0.0391374	0.0729921	0.112509	0.350795	0.3832	0.134108	0.165685	0.294727	0.0529115	0.61064	0.194857	0.167121	0.132869	0.0576918	0.0560438	0.144518	0.187009	0.383802	0.289358	0.114258	0.124794	0.454103	0.434691	0.113966	0.182865	0.0133036	0.0600682	0.332709	0.336433	0.307662	0.297873	0.0885551	0.113779	0.0530147	0.0242622	0.0265949	0.0334454	0.203175	0.349525	0.145279
0	0.0634154	0.0287329	0.0269906	0.290222	0.245133	0.128015	0.191421	0.204447	0.184953	0.0513509	0.336286	0.13518	0.281798	0.263697	0.339413	0.269412	0.155832	0.341619	0.134317	0.330648	0.242154	0.15914	0.15159	0.148749	0.276497	0.283323	0.184296	0.359679	0.308493	0.249605	0.202988	0.337547	0.359924	0.262158	0.169438	0.218519	0.0729614	0.065758	0.126331	0.31986	0.393438	0.214691	0.139877	0.208453	0.127107	0.28507	0.289871	0.350092	0.20873
0	0.150201	0.0380493	0.0172231	0.417124	0.311729	0.0877743	0.18155	0.265857	0.0645517	0.0330189	0.140574	0.165274	0.366026	0.283897	0.278499	0.215317	0.356928	0.222959	0.65905	0.500022	0.402607	0.266265	0.129345	0.155609	0.231436	0.345804	0.456409	0.535004	0.267517	0.281495	0.543528	0.570911	0.188617	0.229436	0.0605137	0.11551	0.443329	0.554532	0.528871	0.361913	0.168035	0.292968	0.0733731	0.0590312	0.0430059	0.107197	0.290103	0.490917	0.225651
0	0.187261	0.102444	0.0380405	0.457687	0.569254	0.213512	0.475904	0.437151	0.165493	0.0567247	0.680295	0.343423	0.485336	0.51507	0.742607	0.465225	0.335127	0.775251	0.405893	0.637853	0.862392	0.49515	0.151993	0.256735	0.392046	0.46947	0.401094	0.54812	0.437632	0.596507	0.428298	0.50512	0.265145	0.855731	0.194634	0.271024	0.217569	0.136289	0.318119	0.611145	0.655779	0.671437	0.308883	0.176592	0.246806	0.527022	0.89218	0.639537	0.295861
0	0.182491	0.0518944	0.0378833	0.476662	0.501854	0.123655	0.273122	0.218974	0.0605124	0.069028	0.256174	0.203352	0.348422	0.328252	0.306065	0.24011	0.394138	0.186097	0.399106	0.379882	0.387312	0.356526	0.147834	0.239566	0.189424	0.363643	0.443023	0.476705	0.334371	0.319272	0.48622	0.643703	0.328723	0.215851	0.112728	0.195816	0.666715	0.620702	0.742078	0.500937	0.227563	0.307046	0.101137	0.0686594	0.0955737	0.11785	0.394551	0.495442	0.35758
0	0.0786333	0.0191072	0.0277507	0.0943473	0.181974	0.0734279	0.0949021	0.18353	0.123384	0.0402707	0.0693649	0.114276	0.35988	0.388906	0.131549	0.171444	0.294385	0.0513689	0.609129	0.193648	0.165715	0.136674	0.0601059	0.0550729	0.141893	0.18036	0.389874	0.283747	0.109957	0.127305	0.455792	0.445132	0.114875	0.185173	0.0118565	0.0600964	0.330085	0.325442	0.301999	0.303762	0.0871465	0.114081	0.0498398	0.0237802	0.0261249	0.0326968	0.200509	0.353978	0.139978
0	0.104919	0.035578	0.0355273	0.183683	0.216599	0.0792695	0.108189	0.208051	0.142198	0.0503385	0.12042	0.139772	0.416868	0.304969	0.173806	0.189658	0.25968	0.0733646	0.293292	0.218865	0.217904	0.199136	0.117777	0.0660909	0.177747	0.206599	0.345494	0.310482	0.122401	0.243166	0.345441	0.444144	0.14785	0.175789	0.0233463	0.0924225	0.286228	0.236898	0.264904	0.285883	0.11211	0.228077	0.0605489	0.03964	0.0529118	0.0421892	0.183506	0.364735	0.257049
0	0.298713	0.0933366	0.0817235	0.560091	0.485468	0.421691	0.422295	0.642627	0.449312	0.1222	0.603491	0.516638	0.838306	0.442889	0.722209	0.72442	0.378755	0.793931	0.317704	0.61594	0.916356	0.658565	0.274409	0.308383	0.757509	0.669542	0.604389	0.488401	0.430082	0.368157	0.365716	0.571675	0.467188	0.898389	0.202451	0.327418	0.329313	0.169801	0.389029	0.587903	0.611423	0.611057	0.281405	0.180617	0.266991	0.401778	0.327108	0.70738	0.439641
0	0.0858615	0.000627597	0.00336755	0.0824674	0.0765886	0.00357724	0.132477	0.00101413	0.000738766	0.000363563	0.0180726	0.387566	0.0204088	0.00144775	0.0699828	0.0899063	0.00455626	0.359058	0.00270546	0.0217003	0.015314	0.631362	0.109571	0.00213029	0.04746	0.0105016	0.0447937	0.0414812	0.00388538	0.012084	0.00756078	0.0157017	0.0146545	0.00863903	0.00414446	0.240734	0.0316892	0.0009241	0.0553838	0.281522	0.00278793	0.00958443	0.00011834	0.00554923	0.169902	0.00724885	6.69986e-05	0.152991	0.00562191
0	0.295944	0.223315	0.0441142	0.778423	0.991523	0.26572	0.64936	0.540501	0.142798	0.074518	0.69063	0.454853	0.639256	0.544913	0.650946	0.529504	0.388586	0.505873	0.174596	0.509524	0.611354	0.696505	0.269564	0.930091	0.474429	0.640433	0.687498	0.595081	0.656389	0.550987	0.517357	0.526098	0.448998	0.413334	0.286127	0.404184	0.235708	0.213813	0.408535	0.550444	0.528855	0.576981	0.198885	0.169062	0.253579	0.366932	0.674257	0.492907	0.515612
0	0.0953176	0.047162	0.0183587	0.372175	0.274678	0.174338	0.325685	0.21378	0.169594	0.0378543	0.438698	0.179617	0.288717	0.303905	0.30818	0.251672	0.171568	0.428746	0.165669	0.34984	0.375358	0.305541	0.105143	0.187939	0.225991	0.260413	0.260021	0.363021	0.303953	0.313007	0.205828	0.245672	0.214948	0.337685	0.162105	0.206407	0.15742	0.104337	0.190909	0.309686	0.377489	0.309619	0.17395	0.209583	0.128849	0.352474	0.49754	0.356499	0.217175
0	0.0900995	0.023829	0.0261386	0.212105	0.191579	0.066787	0.12864	0.160681	0.0760055	0.0501737	0.0891565	0.0947127	0.308294	0.19696	0.166464	0.177894	0.272947	0.0827001	0.473121	0.25518	0.192427	0.146675	0.0804169	0.071096	0.178483	0.267048	0.320367	0.368328	0.166614	0.149705	0.252033	0.393255	0.26457	0.151206	0.0549461	0.111902	0.238928	0.32291	0.253053	0.171771	0.124197	0.166946	0.0741493	0.0437754	0.0367405	0.0495927	0.176218	0.225488	0.204814
0	0.28196	0.135124	0.0715751	0.643735	0.895854	0.285651	0.573126	0.526621	0.198753	0.122334	0.666338	0.33324	0.738321	0.527759	0.780002	0.513959	0.513652	0.402465	0.300875	0.611825	0.661811	0.433161	0.227101	0.296456	0.550451	0.874374	0.628495	0.66443	0.550325	0.501532	0.585451	0.612985	0.588454	0.652714	0.304392	0.337692	0.21357	0.275547	0.462524	0.602701	0.504671	0.541417	0.22269	0.181252	0.166175	0.377744	0.671229	0.770049	0.708501
0	0.1385	0.0266269	0.0359352	0.274726	0.26727	0.0965182	0.207379	0.157703	0.0602513	0.0757477	0.231027	0.142739	0.273954	0.218653	0.412706	0.212775	0.293267	0.211783	0.499467	0.304056	0.302879	0.205764	0.126039	0.108288	0.230155	0.336293	0.233886	0.333021	0.189552	0.226492	0.288058	0.41845	0.298792	0.227173	0.0850316	0.166072	0.370739	0.330066	0.410451	0.293242	0.199407	0.241128	0.126793	0.0937302	0.0954126	0.0897683	0.208497	0.334364	0.374664
0	0.14351	0.0270974	0.0304157	0.280884	0.292803	0.115794	0.258699	0.180028	0.115095	0.0542495	0.243111	0.167701	0.306058	0.236645	0.254123	0.24332	0.369315	0.126975	0.341404	0.272104	0.268512	0.279943	0.109362	0.132243	0.198109	0.368877	0.288617	0.34784	0.182209	0.218793	0.284566	0.410141	0.283047	0.241175	0.0778922	0.154641	0.550636	0.492684	0.547451	0.310141	0.203556	0.261816	0.12883	0.0686859	0.0887889	0.0893664	0.237654	0.421172	0.340433
0	0.0838581	0.000513548	0.0028366	0.110962	0.077342	0.000147591	0.127003	0.00126764	0.000647493	0.000396826	0.00955362	0.291693	0.0195828	0.000216771	0.0659187	0.0907256	0.000792204	0.318197	0.00150963	0.0152028	0.0126095	0.605995	0.0698979	0.000631951	0.037824	0.00970766	0.0429838	0.0320743	0.00343822	0.00462681	0.00626904	0.0122141	0.0204474	0.00575693	0.00265374	0.259187	0.0182399	6.58952e-05	0.028422	0.189863	0.00220046	0.00779932	1.40798e-05	0.00507974	0.172379	0.00629284	7.83373e-06	0.129392	0.00626608
0	0.209499	0.0350265	0.0378396	0.271193	0.227151	0.126009	0.191038	0.169801	0.123009	0.0644012	0.212465	0.138822	0.259102	0.212642	0.227468	0.240834	0.301934	0.133543	0.28435	0.298055	0.266336	0.244851	0.10634	0.0977327	0.184171	0.347548	0.213753	0.439572	0.145751	0.217224	0.252033	0.373901	0.197546	0.256112	0.0617879	0.120311	0.507091	0.453015	0.484628	0.258648	0.212449	0.228839	0.165949	0.0770623	0.070567	0.0899314	0.201192	0.437125	0.319402
0	0.197858	0.0486008	0.0347829	0.282228	0.397381	0.124625	0.232751	0.227489	0.0815301	0.0684167	0.22426	0.17679	0.293924	0.217605	0.328922	0.20055	0.418131	0.139321	0.399756	0.247111	0.254946	0.274062	0.125418	0.16121	0.187745	0.489446	0.340149	0.403464	0.240358	0.199257	0.39712	0.425995	0.341463	0.25676	0.0902069	0.186074	0.64216	0.618766	0.653143	0.37224	0.205395	0.193525	0.0845002	0.0808632	0.0663558	0.0886991	0.250796	0.378098	0.370698
0	0.243534	0.099289	0.0733206	0.543988	0.690893	0.223182	0.518439	0.457491	0.154547	0.119095	0.714342	0.33884	0.761387	0.703546	0.831719	0.555915	0.475896	0.533432	0.455773	0.649848	0.749578	0.410507	0.233445	0.327777	0.542462	0.792218	0.510919	0.675952	0.49134	0.522883	0.576428	0.640036	0.496338	0.719485	0.257283	0.312206	0.366948	0.340507	0.537373	0.671272	0.706021	0.590014	0.415598	0.345811	0.254934	0.387636	0.747804	0.782831	0.811658
0	0.174982	0.0326499	0.0342681	0.326127	0.34483	0.130528	0.282477	0.189165	0.117774	0.0641436	0.242767	0.161595	0.325387	0.259197	0.266726	0.22934	0.371383	0.121231	0.29459	0.284932	0.273293	0.296323	0.127957	0.159465	0.190994	0.393994	0.337943	0.429806	0.226557	0.216558	0.333266	0.396233	0.279882	0.248266	0.0836946	0.167185	0.556308	0.569341	0.631364	0.350886	0.22217	0.234967	0.119278	0.0566588	0.0843224	0.0915901	0.301062	0.460066	0.350087
0	0.330972	0.049392	0.0726459	0.955441	0.355239	0.250581	0.749796	0.620136	0.197559	0.126663	0.743909	0.603484	0.943617	0.599938	0.710022	0.790194	0.644558	0.584436	0.327612	0.791331	0.894613	0.853256	0.331075	0.807338	0.640035	0.838384	0.330495	0.765238	0.942659	0.904724	0.709848	0.814394	0.664519	0.59132	0.326364	0.460397	0.495636	0.381188	0.763382	0.968271	0.711285	0.820624	0.19451	0.134492	0.333907	0.402061	0.865747	0.862759	0.617334
0	0.149722	0.0686787	0.0267004	0.382001	0.414484	0.166235	0.442416	0.23795	0.0989101	0.0462288	0.575278	0.203861	0.339493	0.340338	0.365874	0.318111	0.168649	0.357758	0.0963735	0.282357	0.38671	0.346666	0.164054	0.280935	0.281851	0.339498	0.293428	0.344133	0.397136	0.307802	0.21547	0.300046	0.208904	0.36129	0.152648	0.261514	0.134163	0.0928384	0.171496	0.304254	0.439184	0.383934	0.215651	0.293446	0.249176	0.258892	0.431092	0.294052	0.404477
0	0.183124	0.0908414	0.0299485	0.539377	0.541645	0.183834	0.405902	0.402637	0.219071	0.0524911	0.504844	0.252836	0.474852	0.462466	0.629268	0.333486	0.258309	0.760957	0.301227	0.569679	0.660102	0.43443	0.167927	0.273191	0.377733	0.423371	0.384936	0.546651	0.424125	0.461368	0.359434	0.372782	0.26439	0.616827	0.195008	0.251049	0.153173	0.122388	0.244567	0.399179	0.455568	0.485092	0.191656	0.169251	0.157575	0.405128	0.726922	0.448101	0.24528
0	0.240812	0.115984	0.0746582	0.536635	0.63044	0.254595	0.481034	0.70377	0.408697	0.0999772	0.598257	0.607669	0.71152	0.331274	0.744065	0.811307	0.412354	0.813449	0.289842	0.596645	0.961936	0.768998	0.255296	0.431024	0.726063	0.698245	0.761926	0.424411	0.522936	0.376264	0.359842	0.788003	0.44552	0.884093	0.224764	0.367305	0.438974	0.165623	0.442737	0.75955	0.626905	0.65941	0.212422	0.151458	0.272924	0.468432	0.237856	0.740077	0.386364
0	0.149525	0.108233	0.0330009	0.347036	0.569238	0.160241	0.439077	0.310979	0.0423162	0.0585503	0.499952	0.253781	0.461	0.463246	0.485995	0.479352	0.286111	0.368808	0.186747	0.397022	0.444147	0.301167	0.134226	0.359509	0.355342	0.41698	0.47002	0.551088	0.598264	0.438688	0.45649	0.463362	0.395461	0.343402	0.205587	0.327604	0.115821	0.115197	0.263647	0.617786	0.465798	0.404398	0.184388	0.198838	0.191077	0.227802	0.77494	0.365769	0.311452
0	0.178002	0.0439292	0.0491907	0.480066	0.482054	0.116127	0.266667	0.19165	0.0415235	0.0856938	0.235451	0.202424	0.351783	0.362301	0.282501	0.267878	0.344986	0.201429	0.423457	0.431404	0.416849	0.305813	0.179082	0.267425	0.192772	0.344712	0.472103	0.591591	0.316014	0.41014	0.536045	0.800111	0.321531	0.191984	0.0968386	0.180968	0.566473	0.516235	0.595479	0.453	0.244815	0.337219	0.10844	0.0760016	0.114109	0.111123	0.430181	0.394346	0.327922
0	0.14661	0.0324705	0.0229258	0.253818	0.334155	0.105689	0.1315	0.189256	0.0692353	0.03598	0.159848	0.12205	0.331746	0.357464	0.192868	0.189249	0.354282	0.0787557	0.44488	0.292292	0.263144	0.218007	0.082957	0.0885098	0.134242	0.252699	0.337185	0.425932	0.168189	0.242887	0.458775	0.498197	0.141092	0.201472	0.0313463	0.0895904	0.526517	0.595914	0.479406	0.275506	0.122366	0.254431	0.0589915	0.0262065	0.0392494	0.0622464	0.248932	0.410911	0.235999
0	0.182591	0.037909	0.0237648	0.205445	0.380739	0.108565	0.136497	0.209022	0.0482574	0.0410249	0.153337	0.11856	0.299325	0.240304	0.257384	0.163023	0.343956	0.0971838	0.426151	0.248608	0.258301	0.203428	0.073172	0.086256	0.140468	0.334293	0.297952	0.29762	0.170786	0.195973	0.416904	0.405118	0.16243	0.199722	0.0407654	0.103767	0.512467	0.602672	0.509697	0.293001	0.126713	0.232135	0.061623	0.0528759	0.0465046	0.0627178	0.222801	0.420387	0.325316
0	0.19449	0.0375324	0.0339143	0.299389	0.322371	0.120964	0.272587	0.199566	0.087972	0.0573165	0.258607	0.165687	0.335713	0.273435	0.292154	0.23065	0.3797	0.131877	0.347802	0.307251	0.323608	0.291621	0.128346	0.142699	0.21764	0.38623	0.306371	0.448671	0.207767	0.277798	0.360571	0.439441	0.230135	0.274236	0.0718451	0.154232	0.597209	0.575672	0.639772	0.357862	0.229892	0.30317	0.145954	0.0531266	0.0911061	0.0886523	0.34017	0.443146	0.50451
0	0.130037	0.0493887	0.0242421	0.374065	0.26191	0.21786	0.35657	0.181229	0.125921	0.041857	0.455046	0.166676	0.327229	0.475506	0.38568	0.224282	0.180898	0.375258	0.123809	0.260206	0.372462	0.29447	0.154457	0.312109	0.2487	0.325677	0.219801	0.312297	0.259542	0.320057	0.26645	0.261531	0.184631	0.294752	0.171868	0.213754	0.148719	0.114583	0.219093	0.314703	0.334915	0.385061	0.170631	0.190958	0.16316	0.236597	0.507777	0.305503	0.401059
0	0.257469	0.13474	0.068831	0.73605	0.767011	0.343623	0.689559	0.546859	0.15795	0.121075	0.741131	0.485071	0.843088	0.695394	0.678143	0.759339	0.400117	0.638674	0.498697	0.950881	0.90801	0.586154	0.36169	0.395874	0.507071	0.709849	0.751767	0.740032	0.663276	0.921837	0.646386	0.950092	0.529875	0.709842	0.29697	0.351216	0.535795	0.510596	0.738311	0.714356	0.884871	0.812435	0.436916	0.358625	0.326349	0.509516	0.858811	0.702569	0.65143
0	0.313426	0.103586	0.103191	0.905652	0.551921	0.248916	0.664214	0.520316	0.144743	0.0874264	0.70721	0.498105	0.784429	0.47763	0.703726	0.608766	0.494768	0.566279	0.246075	0.625704	0.707867	0.72222	0.335933	0.716921	0.61231	0.808462	0.517159	0.75666	0.853159	0.684416	0.572233	0.681508	0.684898	0.46739	0.314999	0.492038	0.335564	0.267847	0.554513	0.733536	0.657975	0.610341	0.209888	0.249143	0.291476	0.374197	0.591272	0.626328	0.553468
0	0.0603638	0.000296167	0.00232022	0.0313372	0.0521468	0.000840272	0.114139	0.000177768	0.000539526	0.000292694	0.00904166	0.195685	0.00709515	0.000490082	0.0427728	0.0527515	0.00155106	0.187528	0.00185781	0.00496137	0.00524458	0.335953	0.0623364	0.00124741	0.0261191	0.00663108	0.0252945	0.0125781	0.00201649	0.00216806	0.00113548	0.00768154	0.00215049	0.00326413	0.00175596	0.17072	0.0344987	0.000770309	0.0524418	0.29561	0.00146753	0.00860576	8.21001e-05	0.00567081	0.214123	0.00519089	0.00015598	0.150651	0.00610847
0	0.162296	0.0279343	0.0694753	0.372605	0.406192	0.139955	0.216158	0.285927	0.256938	0.104573	0.22254	0.171739	0.415884	0.560997	0.483659	0.279361	0.511873	0.211111	0.796495	0.538768	0.426454	0.238949	0.257159	0.26772	0.236164	0.57724	0.37445	0.693822	0.252668	0.429054	0.418791	0.528417	0.393462	0.2761	0.1332	0.168001	0.595683	0.901235	0.794749	0.521244	0.191285	0.334292	0.1079	0.089017	0.06696	0.166116	0.433401	0.661381	0.317101
0	0.0920648	0.0264503	0.0245234	0.235394	0.201939	0.210235	0.204579	0.213803	0.22776	0.0493906	0.40616	0.14514	0.284046	0.251775	0.30526	0.256802	0.141422	0.285027	0.0973693	0.223929	0.279013	0.217103	0.104371	0.098919	0.246292	0.283239	0.163285	0.276028	0.179075	0.177749	0.15222	0.193304	0.237621	0.294765	0.137469	0.197375	0.111017	0.0676667	0.14197	0.238601	0.305896	0.24458	0.146829	0.138735	0.146833	0.262581	0.270942	0.347609	0.209493
0	0.0903451	0.000995272	0.00497984	0.0552071	0.086135	0.00126962	0.153355	0.00379412	0.00803346	0.000399154	0.016289	0.445049	0.0225684	0.000990474	0.0707412	0.10938	0.0060139	0.289825	0.00327385	0.0258783	0.0381617	0.769253	0.0762109	0.0049642	0.0565048	0.0123705	0.0523079	0.0288982	0.00428344	0.0136703	0.00744122	0.0213541	0.0160572	0.00818852	0.00562754	0.234163	0.0761232	0.00169061	0.09804	0.454176	0.00386159	0.0276943	0.000267825	0.00536023	0.173982	0.0165716	0.000141802	0.241499	0.00457562
0	0.15815	0.0346186	0.0236807	0.223114	0.288277	0.0919066	0.12106	0.17868	0.0510261	0.0387062	0.173446	0.1226	0.323951	0.26637	0.201061	0.158851	0.326101	0.0840422	0.396365	0.25874	0.253217	0.183476	0.0694385	0.0848329	0.170872	0.287962	0.328766	0.360154	0.189656	0.220499	0.349422	0.395874	0.1465	0.177599	0.0393261	0.0917931	0.455223	0.480071	0.421601	0.250546	0.135305	0.2417	0.081892	0.0357928	0.0512752	0.0598036	0.241788	0.388413	0.281986
0	0.219663	0.0431366	0.0742815	0.196022	0.0865725	0.160398	0.18981	0.2677	0.0592582	0.101302	0.256039	0.130368	0.259846	0.383115	0.186964	0.265592	0.149911	0.386755	0.106347	0.385244	0.39274	0.202496	0.213733	0.130429	0.42942	0.223679	0.0629714	0.437327	0.0695503	0.57166	0.22427	0.457913	0.2226	0.18454	0.148883	0.227119	0.111826	0.071417	0.133428	0.247404	0.430301	0.50302	0.537508	0.0999246	0.294007	0.495095	0.297381	0.174926	0.257832
0	0.126252	0.0028551	0.00491338	0.129287	0.0596224	0.00259333	0.0922952	0.010828	0.0217054	0.000892516	0.0397082	0.292271	0.0400408	0.0011847	0.075119	0.112012	0.0132318	0.584135	0.00596662	0.0322575	0.0455837	0.569084	0.203873	0.000254943	0.165211	0.0168567	0.0306029	0.0474458	0.00193748	0.00963784	0.0115641	0.0166571	0.0424144	0.00854067	0.0272475	0.467213	0.0474501	0.00352258	0.0921915	0.213346	0.00565227	0.0264782	9.71212e-05	0.00865077	0.153553	0.012016	2.28799e-05	0.0959002	0.00468401
0	0.210735	0.0502889	0.0253862	0.183052	0.34284	0.107496	0.16825	0.230682	0.0499153	0.043731	0.171379	0.130219	0.284474	0.231292	0.321938	0.179079	0.352705	0.121691	0.417095	0.249306	0.251386	0.213994	0.0875104	0.10616	0.181665	0.366716	0.278619	0.323654	0.188549	0.202453	0.422107	0.395726	0.169823	0.225161	0.050646	0.118441	0.48522	0.579258	0.587811	0.357302	0.150844	0.22075	0.0838726	0.0502775	0.0588743	0.0753697	0.261382	0.447085	0.395391
0	0.22553	0.110715	0.060901	0.327717	0.551788	0.247831	0.575069	0.378159	0.134715	0.104655	0.866666	0.351611	0.49652	0.470764	0.568776	0.524559	0.342804	0.378722	0.197758	0.44741	0.625069	0.516648	0.170345	0.256107	0.33461	0.560303	0.329337	0.408043	0.378154	0.384891	0.327404	0.403921	0.582481	0.53601	0.322969	0.429024	0.326518	0.22772	0.488148	0.712147	0.599458	0.537141	0.313821	0.257938	0.301215	0.395827	0.665963	0.598057	0.490471
0	0.0867555	0.000678344	0.00365709	0.065301	0.0744624	0.00517706	0.135914	0.000859988	0.00088525	0.000356179	0.0223539	0.426498	0.0201728	0.00203492	0.0708535	0.0882717	0.00636839	0.368104	0.00323919	0.0239204	0.0165144	0.627656	0.12861	0.00286498	0.0515627	0.0110436	0.0444181	0.0444539	0.00400395	0.0153253	0.00787349	0.0171522	0.0110809	0.00988087	0.00496308	0.227792	0.0390254	0.00133865	0.0681641	0.324256	0.00311449	0.0108303	0.000179675	0.00604926	0.176881	0.00778889	9.92968e-05	0.163699	0.00560634
0	0.0410989	0.000327577	0.000828597	0.034898	0.0680655	0.0012546	0.132418	0.000191061	0.000525528	7.99731e-05	0.00857544	0.234649	0.00617609	0.000460333	0.0443388	0.0494387	0.00143631	0.251418	0.00226229	0.010246	0.00368829	0.446241	0.0409185	0.00119964	0.0233317	0.00247233	0.0306499	0.0194666	0.00255404	0.00347845	0.00178504	0.00542599	0.00250794	0.003697	0.00113907	0.18051	0.0304778	0.00104228	0.0681152	0.398534	0.000693275	0.0024323	5.00384e-05	0.00135828	0.110222	0.00617563	0.000224404	0.180921	0.00125547
0	0.283545	0.181859	0.0919868	0.871588	0.696331	0.265785	0.628257	0.468838	0.14416	0.056796	0.704065	0.408988	0.655554	0.4042	0.696614	0.511956	0.364052	0.574191	0.187054	0.550461	0.583822	0.699829	0.332996	0.6184	0.548402	0.745503	0.63292	0.709101	0.704778	0.525189	0.457021	0.570626	0.624111	0.435841	0.323355	0.479601	0.26528	0.209208	0.409124	0.540142	0.600532	0.478345	0.234675	0.26282	0.284177	0.381263	0.457195	0.504649	0.510264
0	0.172654	0.040877	0.026396	0.315748	0.445743	0.127098	0.226899	0.245491	0.0332536	0.0394467	0.224617	0.214793	0.326084	0.268621	0.392014	0.229343	0.500689	0.17835	0.741042	0.306727	0.414504	0.373222	0.0882774	0.146517	0.184933	0.427257	0.390062	0.309041	0.293036	0.220455	0.465691	0.569469	0.164114	0.29296	0.0741119	0.122797	0.642211	0.471847	0.913207	0.487798	0.193469	0.298636	0.103746	0.0378399	0.0519356	0.122315	0.248692	0.750263	0.470732
0	0.164045	0.0219171	0.0364227	0.284001	0.23849	0.145209	0.110117	0.346149	0.47937	0.0573762	0.172799	0.150119	0.372896	0.30675	0.419652	0.161638	0.446271	0.225727	0.812923	0.381824	0.333098	0.216162	0.173825	0.135232	0.235837	0.488979	0.244518	0.597099	0.147436	0.294734	0.524017	0.69574	0.23427	0.267449	0.0573204	0.107655	0.550107	0.720651	0.576293	0.231376	0.154538	0.304858	0.0930752	0.0901936	0.0655728	0.13803	0.235383	0.61526	0.421554
0	0.27658	0.235703	0.0416187	0.89104	0.689634	0.299327	0.655149	0.496823	0.179642	0.0645279	0.713719	0.395837	0.685315	0.441	0.666189	0.602408	0.347709	0.578015	0.194537	0.633814	0.61481	0.791066	0.313715	0.557457	0.492049	0.67374	0.600671	0.65995	0.619927	0.544723	0.452268	0.553448	0.505653	0.491438	0.329935	0.413157	0.325997	0.254566	0.439033	0.528697	0.560291	0.522459	0.235524	0.139117	0.312728	0.395951	0.577369	0.576	0.539348
0	0.151557	0.0311598	0.0212303	0.197279	0.204178	0.0749881	0.106377	0.170412	0.0344442	0.0360261	0.156635	0.116195	0.305584	0.255101	0.196972	0.125796	0.277773	0.0869814	0.3685	0.233025	0.229473	0.150418	0.0786476	0.0768309	0.197468	0.280291	0.289575	0.369229	0.172859	0.198525	0.345173	0.33434	0.133981	0.154666	0.0383036	0.0874281	0.343174	0.393547	0.349009	0.225237	0.125821	0.210789	0.0934263	0.0415542	0.0534698	0.0507927	0.220754	0.322815	0.296183
0	0.060434	0.0195856	0.0220954	0.231624	0.170782	0.4295	0.215857	0.225417	0.183798	0.0383757	0.45348	0.175174	0.253693	0.303502	0.376186	0.230166	0.168542	0.381889	0.181239	0.296365	0.369107	0.200809	0.111494	0.196419	0.288432	0.358343	0.151695	0.31951	0.180734	0.245762	0.196289	0.502586	0.216949	0.285231	0.172797	0.184375	0.173883	0.108776	0.189178	0.262456	0.47815	0.332592	0.315192	0.399241	0.155225	0.325157	0.210483	0.319316	0.333366
0	0.17051	0.0284885	0.0329525	0.282756	0.298257	0.126935	0.259993	0.177316	0.113538	0.0601153	0.235344	0.149042	0.305828	0.245283	0.261043	0.22479	0.354412	0.116499	0.29624	0.271169	0.25064	0.263151	0.123438	0.149419	0.193546	0.383928	0.301912	0.421331	0.201727	0.219378	0.308711	0.377069	0.250278	0.241509	0.0751111	0.153435	0.544189	0.563477	0.603393	0.322688	0.229867	0.225981	0.134965	0.0699596	0.0869415	0.0874939	0.281131	0.429483	0.362794
0	0.14918	0.0293397	0.020782	0.189476	0.165495	0.0693538	0.10063	0.166567	0.027335	0.0365218	0.147106	0.114015	0.30239	0.25098	0.195935	0.11463	0.257539	0.0886779	0.357911	0.225458	0.219526	0.135297	0.0854654	0.0741192	0.209389	0.282181	0.275312	0.374554	0.165426	0.191393	0.345898	0.310464	0.132338	0.143236	0.0387038	0.086704	0.29393	0.361002	0.317868	0.212097	0.121402	0.198217	0.0983983	0.044708	0.055207	0.0463467	0.210389	0.291443	0.309998
0	0.0602271	0.0265698	0.0305197	0.28611	0.246824	0.109557	0.165453	0.197238	0.172445	0.0569115	0.29476	0.122538	0.283928	0.255252	0.352209	0.272077	0.153183	0.315514	0.123013	0.324371	0.203887	0.11688	0.1743	0.160065	0.290779	0.299368	0.171718	0.367015	0.323516	0.246079	0.213343	0.374739	0.403931	0.230324	0.170351	0.224322	0.0416139	0.0516777	0.104317	0.319311	0.39798	0.189814	0.123912	0.226829	0.129761	0.245133	0.230318	0.335037	0.216031
0	0.322877	0.127864	0.0605414	0.673587	0.850157	0.326637	0.744203	0.560678	0.132274	0.0981585	0.781259	0.436373	0.605694	0.474889	0.765038	0.660688	0.482606	0.461005	0.229845	0.590225	0.668855	0.556207	0.259712	0.552796	0.529701	0.814345	0.456058	0.548765	0.520651	0.559409	0.503157	0.622713	0.480473	0.504151	0.374714	0.382918	0.475172	0.352635	0.564289	0.570586	0.622672	0.603942	0.253095	0.153466	0.306935	0.344212	0.612544	0.673255	0.745973
0	0.343428	0.143939	0.0638678	0.662585	0.796615	0.334536	0.632697	0.490758	0.155896	0.108398	0.686467	0.330395	0.654219	0.443951	0.758934	0.578986	0.413057	0.363585	0.196048	0.531504	0.554818	0.658362	0.244975	0.411662	0.546778	0.733908	0.504225	0.593849	0.547563	0.493269	0.488964	0.527706	0.495826	0.429445	0.299988	0.368676	0.357012	0.344315	0.519432	0.509965	0.565791	0.491307	0.309834	0.129806	0.274761	0.430674	0.596664	0.625089	0.812812
0	0.283039	0.149649	0.118828	0.843315	0.728131	0.244371	0.612368	0.469355	0.125962	0.0699138	0.679181	0.421575	0.666303	0.401559	0.74413	0.46925	0.408009	0.564607	0.219864	0.540112	0.593545	0.632342	0.342239	0.642091	0.58941	0.789735	0.682757	0.745375	0.754806	0.538193	0.497218	0.602893	0.713396	0.419349	0.318521	0.51147	0.253875	0.212329	0.434715	0.583605	0.618104	0.469509	0.229094	0.333976	0.261893	0.372914	0.425952	0.504276	0.4868
0	0.284616	0.112198	0.0668495	0.582312	0.644395	0.248694	0.554452	0.434962	0.122001	0.108406	0.72763	0.337971	0.711066	0.65733	0.813234	0.589001	0.420876	0.509215	0.390536	0.611912	0.697723	0.541207	0.247116	0.414521	0.533289	0.71216	0.470825	0.650954	0.466405	0.53782	0.540179	0.602228	0.455556	0.56847	0.261558	0.333405	0.445764	0.384505	0.576199	0.616972	0.742533	0.576425	0.457417	0.307756	0.316244	0.410069	0.725844	0.675692	0.863891
0	0.0759058	0.0171889	0.0259319	0.0886425	0.17107	0.0700536	0.0894268	0.175802	0.116853	0.0377848	0.064881	0.106706	0.33615	0.366303	0.125882	0.161984	0.2823	0.0551076	0.594707	0.187197	0.159313	0.126822	0.0538601	0.0528498	0.139193	0.176514	0.371398	0.272061	0.106263	0.115381	0.434687	0.429191	0.109025	0.178373	0.0112207	0.0565537	0.316116	0.314216	0.289687	0.289945	0.0828747	0.106845	0.0467123	0.0222864	0.0251683	0.0325978	0.187496	0.339194	0.131375
0	0.0949769	0.0351896	0.0371184	0.172994	0.191277	0.0744733	0.103708	0.211649	0.154804	0.0518574	0.108891	0.141626	0.429483	0.309632	0.168602	0.189562	0.240912	0.0720464	0.271645	0.208121	0.208236	0.196509	0.127317	0.061689	0.183116	0.191784	0.342072	0.30362	0.108496	0.243468	0.344101	0.442449	0.14609	0.171848	0.0205134	0.0918352	0.240206	0.182529	0.227199	0.287774	0.106729	0.220897	0.0588118	0.041197	0.0535335	0.0378157	0.170428	0.350371	0.255134
0	0.342148	0.143482	0.0641029	0.660976	0.800317	0.333658	0.631489	0.492286	0.157204	0.108707	0.685511	0.330365	0.656636	0.444905	0.760304	0.577251	0.415955	0.364209	0.198976	0.533567	0.55738	0.653393	0.243973	0.407667	0.547484	0.737189	0.506767	0.59558	0.549402	0.492791	0.490958	0.529644	0.49629	0.436072	0.300401	0.368228	0.354072	0.342917	0.518395	0.51233	0.56299	0.491943	0.307287	0.131363	0.27139	0.428894	0.596971	0.630383	0.810227
0	0.167056	0.0316767	0.0517298	0.386355	0.367905	0.103696	0.230622	0.155268	0.0309599	0.0994953	0.217368	0.160177	0.312923	0.309698	0.37812	0.241459	0.270991	0.230461	0.489575	0.403945	0.37966	0.210685	0.180909	0.203239	0.218811	0.33393	0.368597	0.554215	0.255527	0.363573	0.450947	0.676877	0.305552	0.197666	0.0842849	0.171415	0.360237	0.350567	0.41229	0.34852	0.238159	0.28467	0.118447	0.0896682	0.114292	0.0958996	0.351949	0.298684	0.347002
0	0.177201	0.100924	0.0393699	0.402546	0.547785	0.22473	0.488151	0.430764	0.146059	0.0561241	0.740784	0.368034	0.467728	0.516342	0.748592	0.504985	0.353277	0.743922	0.429833	0.638869	0.904321	0.502391	0.136121	0.234018	0.381362	0.466234	0.390503	0.526484	0.42588	0.623909	0.433644	0.536835	0.260712	0.914712	0.191858	0.273381	0.24353	0.140523	0.340418	0.680571	0.719671	0.718374	0.351214	0.17679	0.27477	0.571794	0.92745	0.703656	0.308027
0	0.107187	0.0262511	0.0177538	0.259348	0.274324	0.0949325	0.127953	0.200496	0.0724767	0.0271382	0.106856	0.123252	0.312534	0.47609	0.178866	0.190988	0.318387	0.0818213	0.486334	0.319245	0.260626	0.223382	0.116425	0.0861191	0.124496	0.176681	0.310685	0.549345	0.116598	0.250789	0.614125	0.561237	0.117876	0.207244	0.0177472	0.0821746	0.453071	0.598919	0.442702	0.292241	0.0982312	0.228073	0.0434338	0.0204325	0.0259412	0.0573608	0.237456	0.343996	0.167912
0	0.0849835	0.000400722	0.00370984	0.0592012	0.0526142	0.00101115	0.10869	0.000614588	0.000619756	0.000480258	0.0115308	0.234833	0.0136859	0.000663331	0.0533035	0.0723967	0.00213276	0.212998	0.00168844	0.00751276	0.010335	0.390229	0.08962	0.00133566	0.0356357	0.011106	0.0301751	0.0189556	0.00240309	0.00408812	0.0033507	0.0121243	0.00904281	0.0047696	0.00293478	0.200639	0.0328145	0.000451447	0.0366249	0.196408	0.00247425	0.0129039	9.64608e-05	0.00848429	0.266078	0.00523606	5.36688e-05	0.12526	0.00938891
0	0.260308	0.189352	0.0444602	0.752787	0.776935	0.231969	0.545452	0.498443	0.130326	0.087145	0.635046	0.406167	0.58126	0.439441	0.532091	0.533425	0.319492	0.498647	0.136407	0.452678	0.485372	0.645165	0.301838	0.864857	0.459037	0.577242	0.632205	0.571129	0.699797	0.462504	0.42438	0.48438	0.549944	0.360848	0.290584	0.433899	0.2046	0.168376	0.337485	0.486291	0.485993	0.445642	0.149852	0.147272	0.250316	0.374439	0.519892	0.455612	0.373312
0	0.149419	0.108082	0.0329789	0.346881	0.568913	0.160052	0.438699	0.310673	0.0423572	0.0585199	0.499649	0.253393	0.460525	0.463044	0.486423	0.478473	0.28601	0.368733	0.186797	0.396978	0.443878	0.300653	0.134221	0.359183	0.355269	0.4173	0.469379	0.550887	0.597944	0.438204	0.456292	0.463715	0.395835	0.343152	0.205782	0.327681	0.115759	0.115209	0.263552	0.61741	0.465534	0.403742	0.18413	0.198805	0.190816	0.227737	0.774084	0.365977	0.31137
0	0.15171	0.110528	0.0593089	0.584898	0.462081	0.206155	0.388089	0.48339	0.0777555	0.110631	0.718985	0.436862	0.533582	0.343606	0.611325	0.583775	0.306142	0.563583	0.170828	0.513375	0.52056	0.630534	0.245589	0.377955	0.469095	0.676243	0.367967	0.448925	0.367919	0.48121	0.286739	0.576707	0.793042	0.46733	0.384108	0.502312	0.233285	0.13916	0.281158	0.454798	0.636766	0.509202	0.245109	0.239135	0.353189	0.476928	0.430372	0.588567	0.358609
0	0.191205	0.0546751	0.0544544	0.308785	0.428448	0.11256	0.236537	0.307184	0.0939265	0.0752974	0.181889	0.252682	0.51366	0.707441	0.377253	0.267321	0.588306	0.152529	0.3508	0.458032	0.488674	0.316889	0.150484	0.174426	0.261607	0.371308	0.569157	0.587236	0.276986	0.361669	0.883788	0.761386	0.222675	0.381184	0.0610978	0.130598	0.772704	0.772239	0.81746	0.66289	0.217031	0.373189	0.0883217	0.0434023	0.0538163	0.12324	0.554761	0.906871	0.297441
0	0.0881577	0.000502971	0.00420697	0.0387554	0.0411579	0.00152776	0.0988296	0.000951723	0.00195142	0.000546717	0.0142799	0.211127	0.0125284	0.000911551	0.0486224	0.0661007	0.00348606	0.186032	0.00204741	0.0053894	0.0114886	0.297774	0.106402	0.00160547	0.0428477	0.012146	0.0240366	0.0144579	0.0018751	0.00418282	0.00246981	0.0123702	0.00568162	0.00453488	0.00462093	0.189459	0.0407639	0.000832945	0.044118	0.200639	0.00280877	0.0162269	0.000136159	0.0101338	0.304005	0.00515983	7.37686e-05	0.121398	0.0105921
0	0.276333	0.14274	0.0986312	0.891734	0.712688	0.237903	0.70278	0.443895	0.108013	0.055171	0.738406	0.431386	0.611085	0.489862	0.711012	0.486668	0.384592	0.687238	0.210255	0.558971	0.687946	0.703294	0.343285	0.504383	0.560505	0.721153	0.63514	0.725888	0.756515	0.652417	0.513671	0.62014	0.616437	0.439512	0.308698	0.48615	0.257297	0.189682	0.416757	0.643963	0.649973	0.609849	0.242544	0.314438	0.27283	0.393863	0.565647	0.495038	0.511884
0	0.121444	0.0196449	0.0331783	0.070745	0.0842266	0.0401588	0.050643	0.0902686	0.0191463	0.044384	0.0586223	0.0590585	0.236114	0.097666	0.0741889	0.120051	0.152834	0.0349066	0.148295	0.112055	0.0835728	0.0640743	0.0353451	0.027387	0.12063	0.188445	0.147683	0.152125	0.0550002	0.108486	0.142507	0.16171	0.0880785	0.12484	0.0290817	0.0597686	0.145595	0.166374	0.153091	0.0950677	0.0865312	0.0969411	0.145053	0.0769653	0.0715545	0.0215993	0.0760768	0.106066	0.260234
0	0.0834965	0.0339067	0.0190681	0.277497	0.233984	0.197163	0.254414	0.224122	0.221938	0.039583	0.450211	0.165721	0.281545	0.281471	0.308819	0.260387	0.159333	0.37132	0.144289	0.302695	0.338107	0.26748	0.0870815	0.11175	0.238469	0.258603	0.206611	0.317307	0.235364	0.231361	0.169994	0.213441	0.22792	0.339422	0.157615	0.203088	0.151391	0.0963205	0.180506	0.296681	0.350307	0.278086	0.17407	0.14366	0.130132	0.352795	0.411865	0.381031	0.197678
0	0.147284	0.10505	0.0325372	0.343776	0.562402	0.156247	0.431111	0.304518	0.0431823	0.0579091	0.493554	0.24559	0.450995	0.458987	0.495029	0.460813	0.283971	0.367242	0.187805	0.396082	0.438482	0.290316	0.134118	0.352634	0.353793	0.423739	0.456496	0.546841	0.591519	0.428488	0.452329	0.470798	0.403345	0.338124	0.209714	0.32922	0.114505	0.115448	0.261643	0.609862	0.460241	0.390565	0.178955	0.198123	0.185567	0.226435	0.756901	0.370163	0.309719
0	0.100369	0.0408086	0.0162109	0.30576	0.308395	0.174682	0.299121	0.214409	0.161656	0.0326055	0.450327	0.185903	0.240681	0.28368	0.294868	0.236636	0.160503	0.39686	0.139673	0.291302	0.346479	0.323595	0.0864137	0.219931	0.217271	0.227468	0.220091	0.296301	0.267806	0.224258	0.174366	0.217861	0.187976	0.332078	0.149795	0.212824	0.164184	0.0994004	0.186419	0.329923	0.338778	0.294846	0.149157	0.157971	0.125321	0.353482	0.402617	0.344701	0.183167
0	0.0878432	0.000758082	0.0040391	0.0614116	0.0771833	0.00432461	0.138747	0.00159463	0.00265419	0.000365615	0.0209375	0.43475	0.0208979	0.00182052	0.0708949	0.0934492	0.0064317	0.349777	0.00331261	0.0247248	0.0220809	0.662633	0.117121	0.00346948	0.053272	0.0113719	0.046591	0.0409232	0.00408959	0.0152586	0.00782763	0.0184643	0.0121099	0.00954143	0.00510498	0.228353	0.0491433	0.0014689	0.0770433	0.360921	0.00330319	0.0152568	0.000201355	0.00589517	0.176037	0.0099464	0.000111461	0.184432	0.00531037
0	0.210478	0.0547783	0.0272659	0.199222	0.32181	0.106764	0.178913	0.225589	0.0611762	0.0448431	0.198699	0.140279	0.303306	0.249193	0.315169	0.200574	0.372017	0.121411	0.411887	0.269452	0.258927	0.22441	0.0855305	0.116939	0.199587	0.355996	0.310772	0.364153	0.215045	0.230941	0.387457	0.420633	0.170178	0.234191	0.0539625	0.119258	0.503617	0.547455	0.605113	0.370026	0.169735	0.239024	0.0973155	0.036347	0.0649116	0.0832096	0.297819	0.474221	0.388111
0	0.105821	0.0271381	0.0244119	0.21285	0.250072	0.107545	0.140767	0.199004	0.0811971	0.040378	0.117894	0.123339	0.33557	0.531687	0.188482	0.178649	0.303079	0.0823465	0.483061	0.301489	0.255387	0.196782	0.0982079	0.094686	0.155797	0.192184	0.291928	0.556533	0.123826	0.231233	0.579607	0.501774	0.149289	0.227127	0.0252774	0.0812148	0.406302	0.532722	0.445382	0.285781	0.11222	0.196834	0.059361	0.0239362	0.0386119	0.0566069	0.31307	0.345021	0.183364
0	0.113663	0.0228183	0.0186462	0.264786	0.273815	0.0991339	0.126862	0.197441	0.0730615	0.0277719	0.106659	0.114672	0.317365	0.500202	0.178978	0.188071	0.332062	0.0784016	0.499053	0.313754	0.252554	0.228309	0.122712	0.0834348	0.116819	0.180414	0.29523	0.56218	0.103528	0.25108	0.655831	0.593026	0.111638	0.206831	0.0156844	0.0799745	0.480139	0.654795	0.46868	0.287792	0.0854608	0.235811	0.0369174	0.0185271	0.0220108	0.0519414	0.224459	0.347259	0.175134
0	0.0890294	0.0379201	0.0317144	0.191763	0.221527	0.0712891	0.115655	0.217272	0.126787	0.0452854	0.110321	0.155547	0.390243	0.319177	0.183964	0.195234	0.260572	0.0864288	0.340947	0.258263	0.255327	0.204403	0.112812	0.0765372	0.181034	0.190365	0.371123	0.361618	0.136496	0.253285	0.373002	0.453915	0.149829	0.185872	0.0238707	0.0950545	0.294588	0.22758	0.271558	0.311301	0.12797	0.229381	0.0634216	0.0372712	0.0521382	0.0533823	0.209539	0.357608	0.21533
0	0.151659	0.029844	0.0236841	0.131022	0.307931	0.094657	0.120337	0.212403	0.0659781	0.0402589	0.0949345	0.109558	0.294919	0.279096	0.239082	0.148421	0.307229	0.0882877	0.511745	0.203647	0.208313	0.16734	0.074081	0.0694397	0.136605	0.296651	0.292744	0.256708	0.1237	0.135701	0.476604	0.389756	0.144882	0.194405	0.0290961	0.090221	0.409216	0.520077	0.43977	0.309679	0.0987816	0.15624	0.050591	0.0551216	0.0357556	0.0467576	0.189469	0.374006	0.283549
0	0.121885	0.0598077	0.0227622	0.473706	0.304304	0.152796	0.383887	0.1877	0.0959201	0.0450823	0.376947	0.18005	0.302128	0.30815	0.303635	0.23483	0.172159	0.429287	0.151007	0.342321	0.372575	0.312746	0.149955	0.290794	0.214892	0.287916	0.297631	0.390997	0.351596	0.383179	0.242409	0.274405	0.204986	0.290177	0.148685	0.20571	0.126015	0.0877268	0.167992	0.271088	0.374162	0.323859	0.146397	0.304785	0.143679	0.261342	0.486105	0.285648	0.258665
0	0.156455	0.0428833	0.0262748	0.352537	0.383488	0.108113	0.248037	0.242094	0.0825889	0.0480984	0.214574	0.199984	0.35598	0.283441	0.271164	0.270661	0.389117	0.142003	0.453894	0.339025	0.330084	0.309234	0.11232	0.18572	0.222802	0.35721	0.432806	0.444796	0.306615	0.244601	0.377988	0.405601	0.239601	0.249198	0.0813959	0.141171	0.64499	0.58551	0.681613	0.384166	0.240895	0.262688	0.109748	0.0442926	0.0850699	0.109818	0.333391	0.497199	0.302444
0	0.156479	0.0622047	0.043626	0.470339	0.455312	0.262205	0.465556	0.373367	0.114405	0.0740462	0.704845	0.325181	0.456508	0.494814	0.62869	0.432475	0.334241	0.447788	0.237818	0.531476	0.659978	0.453451	0.189304	0.328231	0.351462	0.492276	0.324311	0.579293	0.360487	0.499243	0.400488	0.523394	0.425426	0.567836	0.251872	0.312125	0.226509	0.144349	0.316138	0.521044	0.743581	0.58817	0.365317	0.183126	0.239473	0.43452	0.713232	0.583261	0.408822
0	0.150408	0.0262507	0.0389749	0.239736	0.272705	0.142034	0.224751	0.206532	0.128299	0.0743812	0.20795	0.147459	0.3344	0.284417	0.266764	0.196617	0.347818	0.101216	0.32687	0.263957	0.272712	0.26502	0.104644	0.111305	0.190412	0.363868	0.265421	0.373851	0.167343	0.220313	0.336555	0.384448	0.266287	0.289021	0.0777782	0.146805	0.553307	0.529124	0.611948	0.360861	0.194774	0.251346	0.140235	0.0809515	0.0686471	0.0872202	0.313942	0.498603	0.401086
0	0.204284	0.169563	0.0856893	0.813502	0.868669	0.226464	0.636207	0.665661	0.175606	0.188583	0.576768	0.488608	0.904608	0.566938	0.942909	0.608575	0.640141	0.6329	0.50673	0.885851	0.8793	0.588226	0.354028	0.589815	0.647615	0.768537	0.978178	0.85633	0.802886	0.743182	0.788233	0.784845	0.902024	0.61325	0.331339	0.480599	0.401685	0.386942	0.722123	0.92997	0.605114	0.668582	0.155579	0.333914	0.220054	0.385044	0.785449	0.849875	0.294071
0	0.0768276	0.00126014	0.0019851	0.0408538	0.0766842	0.00139771	0.33839	0.00177767	0.0104544	0.000521695	0.0416879	0.331551	0.00346345	0.000946899	0.0636827	0.095444	0.00470608	0.180355	0.00055846	0.00504343	0.0274174	0.659858	0.0688877	0.00228664	0.0359601	0.0177291	0.0197644	0.00843524	0.00294733	0.00163726	0.00167002	0.00381134	0.00436712	0.008719	0.0150137	0.21204	0.0463259	0.000560014	0.0474589	0.329587	0.006362	0.0154696	0.00083805	0.00923882	0.292234	0.023697	0.000253565	0.176741	0.0103817
0	0.145932	0.0335507	0.0170172	0.406443	0.271841	0.0853327	0.16732	0.254458	0.0699004	0.0327234	0.122374	0.145862	0.355388	0.281104	0.271531	0.18923	0.335983	0.229578	0.661151	0.519076	0.40162	0.242343	0.133964	0.133812	0.22163	0.338242	0.434633	0.55487	0.225312	0.283237	0.565684	0.602349	0.17842	0.222973	0.050602	0.111344	0.352833	0.515799	0.448598	0.338955	0.143378	0.28886	0.0662526	0.0632995	0.0313788	0.0988429	0.267161	0.464814	0.205277
0	0.180744	0.0382638	0.0562779	0.458084	0.445297	0.108592	0.259995	0.173784	0.0246881	0.0940795	0.225493	0.198915	0.355134	0.382827	0.2712	0.285818	0.312523	0.208644	0.446886	0.463691	0.441816	0.264143	0.198117	0.272327	0.20407	0.332531	0.470335	0.670061	0.286461	0.480986	0.562953	0.894089	0.29513	0.187972	0.0792824	0.163782	0.50174	0.443146	0.488818	0.407936	0.258399	0.372857	0.124086	0.0785176	0.127643	0.102961	0.457579	0.317379	0.358851
0	0.0836859	0.000534224	0.00269426	0.119614	0.081582	3.82572e-06	0.130202	0.00138654	0.000674476	0.000382617	0.00923701	0.301843	0.0205966	0.00014301	0.0680828	0.093905	0.000579513	0.336037	0.00148448	0.0165453	0.0130741	0.643252	0.0665563	0.000525097	0.0382531	0.00947741	0.0451945	0.0343001	0.00361715	0.00474585	0.00676985	0.012257	0.0223775	0.00593249	0.00261481	0.269088	0.0159308	5.09431e-06	0.027234	0.189544	0.00215882	0.00698948	8.07035e-07	0.00450046	0.156417	0.00650388	4.27292e-07	0.130434	0.00572886
0	0.1116	0.0677157	0.0273841	0.456033	0.300472	0.103472	0.290707	0.229828	0.133551	0.0493949	0.431426	0.192932	0.319668	0.300169	0.325072	0.255816	0.167998	0.356192	0.0795665	0.26761	0.314422	0.313488	0.196753	0.404005	0.248699	0.332316	0.293275	0.324861	0.378241	0.342338	0.219941	0.329463	0.215543	0.196838	0.151618	0.22474	0.0960875	0.057297	0.138953	0.295046	0.350669	0.347065	0.137562	0.393205	0.22247	0.244174	0.307442	0.299402	0.302536
0	0.163444	0.0321488	0.0296391	0.25774	0.279268	0.109775	0.128718	0.1774	0.0539959	0.0542586	0.155192	0.128941	0.37013	0.274906	0.208352	0.192316	0.339205	0.0875152	0.413792	0.295029	0.259605	0.180701	0.094085	0.0928547	0.170853	0.336799	0.35906	0.371674	0.19054	0.245408	0.37351	0.429857	0.182877	0.16707	0.0471935	0.103089	0.46424	0.537276	0.434427	0.234106	0.133777	0.253476	0.0800725	0.0410259	0.0581786	0.0560771	0.233207	0.370393	0.35026
0	0.189847	0.142162	0.0781275	0.830244	0.769173	0.261234	0.669711	0.764714	0.213307	0.163193	0.680851	0.472599	0.867877	0.578136	0.909894	0.702206	0.568352	0.691085	0.438246	0.82646	0.915567	0.632573	0.343267	0.54233	0.668427	0.733041	0.934436	0.87698	0.80958	0.683156	0.756193	0.736103	0.902688	0.672574	0.346881	0.487201	0.31915	0.315901	0.632315	0.965302	0.68068	0.74984	0.167901	0.325938	0.200639	0.440208	0.86466	0.883014	0.28807
0	0.153982	0.0347204	0.024202	0.251258	0.348219	0.106633	0.132949	0.188126	0.0682128	0.0381632	0.172091	0.124797	0.335739	0.324162	0.197869	0.189655	0.361611	0.0797898	0.435741	0.288505	0.268368	0.216701	0.0737362	0.0901332	0.138957	0.270322	0.349108	0.395117	0.183686	0.242253	0.415148	0.480008	0.148255	0.200601	0.0350539	0.0922192	0.541044	0.581951	0.484006	0.275119	0.131455	0.261312	0.063942	0.027912	0.0433679	0.0647777	0.254243	0.427385	0.249466
0	0.21611	0.0363191	0.0382288	0.262399	0.195099	0.122987	0.154288	0.166424	0.113218	0.0644724	0.194413	0.133114	0.254512	0.206812	0.216803	0.238931	0.283562	0.136495	0.299008	0.306665	0.266996	0.223541	0.10188	0.0811687	0.183327	0.335606	0.193923	0.435356	0.130381	0.222926	0.248458	0.377571	0.175974	0.244417	0.0565637	0.106822	0.486572	0.429951	0.439362	0.233134	0.199241	0.230385	0.171287	0.0813641	0.0657608	0.0862256	0.173439	0.419961	0.324464
0	0.198975	0.0506833	0.0384907	0.309244	0.4233	0.121105	0.227289	0.227266	0.0643946	0.0739412	0.220466	0.184889	0.297817	0.237802	0.332431	0.208793	0.411116	0.156156	0.429857	0.276918	0.283204	0.27078	0.137336	0.183549	0.188217	0.482626	0.367459	0.441744	0.255984	0.24183	0.441322	0.514766	0.351076	0.24473	0.0916069	0.188177	0.639323	0.602396	0.635407	0.3881	0.21032	0.213253	0.0816853	0.0860222	0.0726606	0.0916507	0.275589	0.354363	0.365003
0	0.159353	0.0797685	0.0339186	0.548235	0.343264	0.161672	0.407458	0.22677	0.0598577	0.0599606	0.335997	0.22166	0.373613	0.293303	0.339642	0.32646	0.185114	0.422937	0.147622	0.336575	0.36437	0.342737	0.184641	0.358945	0.27289	0.367939	0.394979	0.421331	0.412055	0.414913	0.271666	0.309541	0.254333	0.276404	0.150121	0.219993	0.106093	0.077539	0.155266	0.241434	0.395103	0.32974	0.149778	0.341775	0.178767	0.195482	0.436212	0.236586	0.338827
0	0.168333	0.0585363	0.0247912	0.309855	0.422399	0.245197	0.511972	0.216991	0.0913257	0.0410344	0.634029	0.192983	0.349348	0.447837	0.412057	0.319716	0.175715	0.364641	0.122293	0.27851	0.43552	0.344828	0.131863	0.197144	0.29339	0.338766	0.25045	0.337213	0.335387	0.279934	0.236796	0.255871	0.191084	0.45782	0.165048	0.26656	0.173766	0.1335	0.224431	0.321098	0.453474	0.415586	0.256299	0.153864	0.22718	0.262691	0.566546	0.300587	0.487125
0	0.289131	0.219355	0.0486364	0.755618	0.980297	0.270248	0.659872	0.545259	0.150193	0.0704132	0.68868	0.470981	0.62491	0.521907	0.644157	0.533685	0.363033	0.523299	0.154976	0.472469	0.574987	0.738018	0.273871	0.976219	0.483935	0.612831	0.637923	0.560589	0.73273	0.515573	0.463418	0.490463	0.419142	0.413576	0.274493	0.418172	0.23917	0.189535	0.382722	0.539198	0.524204	0.540819	0.203079	0.186054	0.266206	0.380561	0.607775	0.491892	0.491985
0	0.129528	0.0785622	0.0286339	0.316864	0.504881	0.122917	0.365023	0.251602	0.0514575	0.0524495	0.440176	0.177865	0.366711	0.421139	0.572004	0.305061	0.266645	0.353943	0.196068	0.387243	0.390728	0.202191	0.133543	0.294282	0.341141	0.481841	0.342882	0.509213	0.533184	0.341499	0.416441	0.532063	0.469665	0.294512	0.244174	0.34249	0.105012	0.118261	0.24596	0.542477	0.412772	0.274352	0.132812	0.190863	0.139321	0.215894	0.601286	0.4086	0.295423
0	0.160663	0.0267381	0.0410597	0.282256	0.251161	0.101135	0.183736	0.149614	0.039276	0.0912156	0.198508	0.119724	0.296459	0.231377	0.44187	0.187804	0.255856	0.214246	0.507004	0.320371	0.297004	0.158921	0.147186	0.10542	0.233536	0.350286	0.256362	0.398452	0.203585	0.229008	0.329502	0.393605	0.278577	0.207843	0.0806371	0.163063	0.269564	0.330231	0.370429	0.268067	0.195035	0.206723	0.115064	0.0875276	0.0901297	0.0777678	0.227987	0.297188	0.405848
0	0.245257	0.098888	0.0615185	0.532563	0.738835	0.281486	0.530858	0.50573	0.189323	0.101789	0.64987	0.33958	0.649655	0.517762	0.765837	0.514672	0.450589	0.464693	0.317246	0.590702	0.698904	0.452332	0.200199	0.282692	0.496947	0.725002	0.505736	0.640284	0.527693	0.472227	0.52554	0.551008	0.484958	0.702792	0.258948	0.318703	0.208773	0.216847	0.407016	0.586609	0.573605	0.546824	0.256516	0.18007	0.188466	0.410156	0.701021	0.75983	0.581239
0	0.131371	0.0824521	0.0292451	0.320633	0.51388	0.127894	0.374566	0.258652	0.0493304	0.0533572	0.448134	0.187446	0.379971	0.428755	0.559161	0.329208	0.268776	0.356128	0.195318	0.389409	0.398272	0.213288	0.133347	0.303824	0.342797	0.471718	0.360492	0.516692	0.543644	0.356078	0.42279	0.523586	0.459312	0.300661	0.239014	0.340692	0.105157	0.117231	0.247414	0.553607	0.420792	0.292365	0.140387	0.193042	0.146454	0.21673	0.628849	0.401358	0.297417
0	0.15838	0.0427729	0.0240081	0.289459	0.388909	0.102764	0.158294	0.21649	0.0611413	0.0390933	0.191163	0.159293	0.353438	0.28635	0.226925	0.221738	0.383508	0.105313	0.472158	0.313681	0.308057	0.248469	0.0712684	0.127067	0.174301	0.303274	0.410198	0.379177	0.257626	0.250218	0.375692	0.448516	0.174047	0.212836	0.0530146	0.104257	0.613573	0.578204	0.565143	0.320993	0.175196	0.277292	0.078496	0.0316272	0.0592252	0.0855033	0.2921	0.477186	0.268241
0	0.0875997	0.0169914	0.0195283	0.0750538	0.0871773	0.0358824	0.0435713	0.0961652	0.02109	0.032602	0.0471771	0.0592006	0.252969	0.0950924	0.0712372	0.121687	0.118218	0.0352568	0.152167	0.0873887	0.0631105	0.0652509	0.0296214	0.0275729	0.109196	0.171698	0.17949	0.144305	0.0633285	0.10221	0.13999	0.159125	0.0844773	0.0550981	0.0190999	0.0563454	0.113236	0.135523	0.122647	0.0956651	0.0797768	0.0892289	0.0696331	0.0384299	0.0646737	0.0152658	0.072858	0.114741	0.229768
0	0.074136	0.037113	0.0301352	0.292276	0.299458	0.112225	0.205966	0.20803	0.147567	0.0560144	0.324325	0.133578	0.300831	0.289497	0.396845	0.278751	0.176185	0.323377	0.138045	0.337384	0.242014	0.13363	0.165918	0.187541	0.300973	0.336336	0.20659	0.396403	0.366603	0.265776	0.254945	0.407095	0.417344	0.243253	0.185464	0.248491	0.054221	0.0651156	0.132965	0.364972	0.40114	0.207016	0.125813	0.219745	0.131687	0.238973	0.30676	0.349744	0.232166
0	0.159284	0.0780316	0.0282957	0.57885	0.383941	0.140579	0.440653	0.212707	0.0579522	0.0531808	0.350661	0.196767	0.352826	0.346557	0.372657	0.24197	0.192017	0.504192	0.171659	0.386643	0.434615	0.346467	0.193889	0.37843	0.241549	0.3428	0.35071	0.450835	0.410294	0.463208	0.301241	0.322065	0.209446	0.321171	0.147131	0.215262	0.104145	0.0807137	0.164769	0.265462	0.389466	0.372718	0.132018	0.359143	0.160003	0.212459	0.529959	0.259013	0.292607
0	0.271379	0.155122	0.114043	0.837096	0.759121	0.238626	0.613529	0.493292	0.130987	0.0913156	0.65403	0.4338	0.708123	0.427598	0.779206	0.484342	0.451672	0.571006	0.272178	0.601281	0.637162	0.621548	0.345034	0.637433	0.597203	0.789166	0.734454	0.761777	0.762097	0.576477	0.547246	0.636505	0.744081	0.446124	0.319346	0.505903	0.284671	0.246559	0.488851	0.637175	0.609844	0.495343	0.216112	0.334614	0.256654	0.370406	0.478095	0.557899	0.455881
0	0.28944	0.208834	0.0591574	0.768787	0.941104	0.267129	0.652962	0.531984	0.14622	0.0681763	0.689867	0.46268	0.626598	0.502063	0.654903	0.522944	0.365046	0.528559	0.158961	0.475952	0.573227	0.723999	0.283364	0.928913	0.498228	0.638184	0.639103	0.585352	0.735149	0.514934	0.463189	0.503138	0.458112	0.411692	0.280705	0.432076	0.238157	0.189331	0.384679	0.540127	0.538467	0.528009	0.208112	0.207141	0.26612	0.379722	0.5765	0.488237	0.494372
0	0.0808655	0.0416361	0.0221114	0.220018	0.277408	0.073409	0.143907	0.224478	0.0702761	0.0352513	0.117057	0.176442	0.314953	0.377105	0.215007	0.200756	0.300438	0.112345	0.487923	0.352869	0.340946	0.212427	0.0798636	0.108245	0.179899	0.192253	0.409637	0.496374	0.18836	0.264101	0.447158	0.469205	0.163237	0.221574	0.0319567	0.0988723	0.402732	0.341825	0.379652	0.349305	0.167888	0.234399	0.0747149	0.0288854	0.0503191	0.0824091	0.311857	0.370288	0.141546
0	0.225006	0.027865	0.0350921	0.256376	0.172483	0.0897652	0.0830508	0.206347	0.252745	0.0591232	0.106562	0.127496	0.359974	0.265216	0.202074	0.20154	0.335528	0.104683	0.448345	0.367304	0.29252	0.182085	0.0864826	0.0582564	0.192817	0.308247	0.218932	0.407685	0.113681	0.241536	0.364455	0.429888	0.154644	0.188423	0.0416301	0.0832864	0.536865	0.536028	0.415106	0.193681	0.122297	0.253898	0.0987293	0.0365927	0.0349394	0.0700001	0.175867	0.504448	0.212282
0	0.163623	0.120353	0.0346021	0.421258	0.557892	0.179455	0.491032	0.31785	0.0324795	0.0611873	0.498319	0.28961	0.491495	0.455275	0.383397	0.538074	0.273268	0.393338	0.168107	0.388505	0.463369	0.375902	0.148889	0.411427	0.329744	0.349029	0.525682	0.547294	0.594755	0.507798	0.441382	0.377185	0.297169	0.354207	0.162343	0.288237	0.119577	0.103294	0.248856	0.578624	0.479471	0.478368	0.204358	0.25023	0.219025	0.223722	0.82121	0.302183	0.31974
0	0.0584983	0.0223768	0.0273414	0.261287	0.213229	0.233697	0.180385	0.206648	0.178813	0.0499446	0.351333	0.140759	0.270442	0.271052	0.359443	0.255682	0.157506	0.340134	0.145827	0.314176	0.263535	0.144237	0.149932	0.167275	0.290061	0.319344	0.159432	0.34807	0.264529	0.243052	0.20435	0.423353	0.334649	0.251729	0.170786	0.207369	0.0910058	0.0729654	0.134846	0.294974	0.429968	0.240773	0.19764	0.290524	0.137341	0.276341	0.217025	0.328625	0.258728
0	0.328392	0.141524	0.0654061	0.663094	0.749247	0.329906	0.623394	0.475724	0.161536	0.113737	0.696767	0.332314	0.645657	0.470677	0.738738	0.587416	0.397572	0.372177	0.186676	0.515689	0.540208	0.636848	0.257804	0.416751	0.537542	0.74321	0.480557	0.57115	0.526919	0.485529	0.474117	0.515985	0.541018	0.425352	0.281947	0.3542	0.335683	0.324865	0.494998	0.506738	0.597162	0.486679	0.32651	0.126624	0.294538	0.457154	0.612989	0.604901	0.819698
0	0.17491	0.0237774	0.0258724	0.235045	0.199102	0.130625	0.124221	0.140269	0.062002	0.0379918	0.228415	0.101589	0.276457	0.235368	0.224002	0.154333	0.259576	0.116875	0.356665	0.212645	0.205978	0.159302	0.0939104	0.0660091	0.187759	0.321288	0.190731	0.350321	0.131705	0.167595	0.275211	0.409351	0.155445	0.213847	0.0497043	0.108645	0.374431	0.467193	0.378853	0.175834	0.167737	0.200058	0.124318	0.0426841	0.0942283	0.0638209	0.165983	0.289831	0.597787
0	0.311584	0.191448	0.0517761	0.713416	0.916866	0.297695	0.650846	0.526938	0.153644	0.0866454	0.687288	0.415534	0.636586	0.495344	0.688487	0.555405	0.383228	0.455882	0.170825	0.495943	0.567389	0.709642	0.259005	0.757721	0.505696	0.655062	0.58283	0.567245	0.656043	0.506678	0.47419	0.502195	0.438615	0.420718	0.28338	0.393866	0.288254	0.253563	0.438735	0.526929	0.53671	0.524283	0.24533	0.156701	0.269504	0.401106	0.612244	0.548065	0.623274
0	0.193747	0.0451816	0.0348552	0.284843	0.383347	0.125632	0.241083	0.219592	0.0888361	0.0679581	0.226396	0.172961	0.298469	0.223116	0.316883	0.205621	0.408544	0.134681	0.379746	0.251609	0.255115	0.274639	0.125962	0.159087	0.188409	0.474214	0.337199	0.409084	0.23428	0.20107	0.383014	0.4171	0.32962	0.255802	0.0878481	0.181713	0.622174	0.606524	0.642598	0.362893	0.208402	0.198823	0.0909713	0.0766758	0.0694075	0.088195	0.25701	0.388085	0.36636
0	0.127994	0.0491916	0.0201248	0.366821	0.246927	0.176626	0.253872	0.171317	0.113392	0.0370033	0.400159	0.1505	0.234348	0.313532	0.267486	0.221172	0.146935	0.558397	0.12689	0.364159	0.330174	0.3126	0.147338	0.323797	0.20509	0.223553	0.183355	0.405777	0.214212	0.297732	0.226848	0.265668	0.182607	0.259975	0.146248	0.21007	0.143303	0.100985	0.172997	0.273149	0.325239	0.286087	0.137796	0.25628	0.151348	0.308728	0.416806	0.295154	0.241774
0	0.123798	0.0351238	0.0248707	0.317523	0.335947	0.1035	0.237571	0.197667	0.0919549	0.0424977	0.257764	0.193442	0.300709	0.239808	0.272269	0.24932	0.397327	0.157671	0.42094	0.289177	0.309638	0.315538	0.0925621	0.139438	0.201751	0.341053	0.29001	0.26236	0.206745	0.236899	0.302186	0.484061	0.312278	0.228562	0.093509	0.164294	0.638061	0.496087	0.59008	0.369429	0.184883	0.307304	0.124784	0.081412	0.0909116	0.103029	0.219661	0.445556	0.347569
0	0.0938684	0.0332586	0.0353174	0.162316	0.179462	0.0702461	0.0972206	0.199596	0.14113	0.0498784	0.102002	0.133	0.411298	0.287175	0.158167	0.182405	0.227355	0.0681248	0.258331	0.195038	0.192617	0.182586	0.117338	0.0579465	0.175503	0.189174	0.324821	0.286599	0.103272	0.228589	0.322543	0.41253	0.139537	0.159412	0.0202701	0.088075	0.225292	0.175764	0.214924	0.267588	0.103709	0.20678	0.0598945	0.0409572	0.0547284	0.0352933	0.159709	0.325057	0.252397
0	0.179676	0.106907	0.0377929	0.393368	0.577239	0.219405	0.489772	0.401	0.0771119	0.0625763	0.58364	0.334375	0.528766	0.508417	0.528715	0.587788	0.32227	0.453612	0.239432	0.472014	0.606118	0.427212	0.147286	0.382512	0.375502	0.403663	0.51073	0.609719	0.565089	0.509877	0.488724	0.4321	0.335828	0.514091	0.181656	0.306703	0.154837	0.122506	0.302615	0.639189	0.586485	0.553056	0.257987	0.190429	0.234738	0.315324	0.887238	0.45781	0.338258
0	0.184531	0.0945557	0.0381669	0.401511	0.555447	0.230427	0.482413	0.416351	0.0954853	0.0619599	0.596462	0.339218	0.521306	0.512359	0.580753	0.566495	0.330118	0.484794	0.266316	0.501232	0.655783	0.442032	0.152578	0.367111	0.378562	0.422856	0.47846	0.619573	0.525682	0.503186	0.487387	0.445973	0.338989	0.568988	0.186488	0.303567	0.166976	0.126622	0.312191	0.61921	0.618549	0.566703	0.26998	0.184115	0.233395	0.348426	0.86948	0.51419	0.343534
0	0.209373	0.0482862	0.0247299	0.179265	0.351193	0.107774	0.163373	0.231127	0.0463957	0.0432534	0.162123	0.126554	0.27949	0.226293	0.320701	0.171701	0.346367	0.120522	0.419146	0.243126	0.249439	0.210276	0.0873808	0.101854	0.174091	0.368327	0.269801	0.309969	0.179559	0.193432	0.43241	0.38861	0.169337	0.221105	0.049129	0.117441	0.481002	0.590156	0.578537	0.350131	0.143847	0.215758	0.078634	0.0546595	0.0564	0.0723312	0.248294	0.437442	0.394026
0	0.0931013	0.0352712	0.0354838	0.161018	0.240655	0.10057	0.145273	0.232323	0.0841632	0.0593906	0.147072	0.178768	0.409475	0.583566	0.232111	0.207441	0.368672	0.0927005	0.589859	0.343306	0.323259	0.187534	0.0785773	0.104686	0.203307	0.227355	0.360235	0.492508	0.152593	0.259376	0.513319	0.500443	0.193411	0.238219	0.037273	0.0859347	0.447742	0.474054	0.501453	0.333229	0.150765	0.238661	0.0832042	0.0459594	0.0506576	0.0710043	0.365827	0.487117	0.175946
0	0.207561	0.119142	0.0514629	0.32882	0.59158	0.227141	0.552869	0.376288	0.0954184	0.0873058	0.758627	0.34153	0.511213	0.468509	0.513733	0.557587	0.333803	0.376224	0.195519	0.436566	0.58853	0.477287	0.147868	0.30386	0.341651	0.476297	0.424183	0.474767	0.479493	0.433751	0.386007	0.402945	0.473139	0.490443	0.279079	0.398268	0.265111	0.191572	0.425459	0.713409	0.554232	0.536134	0.275869	0.246585	0.269797	0.325118	0.753905	0.511336	0.413805
0	0.208201	0.0922772	0.0599615	0.717609	0.446429	0.395004	0.46648	0.592892	0.406612	0.102816	0.667174	0.418395	0.784728	0.50356	0.783179	0.656681	0.303088	0.813921	0.270939	0.613003	0.752851	0.590588	0.24897	0.271083	0.718786	0.694971	0.493819	0.563693	0.507118	0.491598	0.36013	0.494233	0.581687	0.687252	0.289069	0.37167	0.221876	0.142956	0.281783	0.453242	0.772167	0.592811	0.485581	0.130996	0.339421	0.579419	0.549698	0.582346	0.539731
0	0.143921	0.028611	0.0240434	0.126648	0.294718	0.0924338	0.11762	0.209192	0.0717522	0.0401793	0.0919925	0.109861	0.301217	0.291114	0.227595	0.1507	0.306264	0.0842886	0.524265	0.202505	0.203572	0.163722	0.0721522	0.0678944	0.13687	0.28443	0.303221	0.259396	0.122278	0.134018	0.475206	0.395559	0.141532	0.193534	0.0272362	0.0868546	0.401587	0.500755	0.42591	0.309172	0.0974319	0.151097	0.0504507	0.051727	0.0345592	0.0452547	0.190834	0.371943	0.267755
0	0.163009	0.00484056	0.00692312	0.13182	0.0380589	0.00491798	0.0577577	0.0188854	0.0398132	0.00134026	0.0661538	0.278235	0.0561323	0.00213149	0.079809	0.125639	0.0242755	0.786017	0.00984642	0.0449631	0.0733681	0.482183	0.324166	0.000110491	0.274235	0.0233641	0.0166784	0.0573159	0.000381905	0.0138108	0.0153733	0.0204562	0.0583964	0.010683	0.0484759	0.631201	0.0763032	0.00659472	0.149145	0.23522	0.00869163	0.0438512	0.000189613	0.0125929	0.161307	0.0166693	4.75386e-05	0.0660331	0.00412123
0	0.163762	0.120774	0.0346681	0.419941	0.559853	0.17987	0.491474	0.319206	0.0325499	0.0612665	0.499901	0.290562	0.493034	0.456523	0.384131	0.540861	0.274145	0.39302	0.16838	0.388972	0.464185	0.376392	0.148501	0.411609	0.33084	0.349329	0.527353	0.54842	0.596472	0.508291	0.442808	0.377838	0.298057	0.355168	0.162576	0.288963	0.119786	0.10357	0.249755	0.581633	0.480417	0.479595	0.205097	0.248949	0.219556	0.224165	0.824229	0.302927	0.319922
0	0.0866548	0.0390888	0.0293885	0.199923	0.234807	0.0700095	0.120811	0.219609	0.114659	0.0424635	0.111113	0.161444	0.373338	0.323167	0.190587	0.19765	0.26924	0.0925728	0.370795	0.279781	0.275529	0.207805	0.106486	0.0829284	0.180063	0.189996	0.383545	0.386418	0.148637	0.25746	0.385328	0.458823	0.151449	0.191904	0.0253449	0.0964344	0.318469	0.247621	0.291041	0.321288	0.137099	0.233107	0.0654117	0.0355751	0.0515344	0.0600788	0.226396	0.360916	0.198415
0	0.165964	0.0269461	0.0278999	0.257436	0.238802	0.129594	0.121642	0.286002	0.301207	0.0447472	0.198264	0.138797	0.310061	0.241682	0.372079	0.172056	0.391159	0.201245	0.632939	0.317989	0.278797	0.204788	0.140189	0.149116	0.228242	0.43155	0.225927	0.489844	0.173079	0.280559	0.412937	0.552246	0.201042	0.239073	0.0652565	0.114853	0.596832	0.70721	0.625483	0.273765	0.201033	0.272354	0.135061	0.117249	0.08305	0.125724	0.236469	0.503266	0.452716
0	0.138898	0.0514422	0.0211388	0.380185	0.245133	0.174041	0.24659	0.158355	0.0906337	0.0378525	0.382946	0.144232	0.224448	0.316232	0.25799	0.212133	0.141665	0.586657	0.116363	0.366196	0.319954	0.315166	0.162922	0.368046	0.198958	0.219475	0.172071	0.419073	0.201522	0.304452	0.236651	0.274127	0.174152	0.236285	0.140881	0.210767	0.135741	0.097879	0.165825	0.259684	0.313405	0.28301	0.125995	0.280052	0.158361	0.286179	0.397621	0.271681	0.253058
0	0.0856449	0.0464638	0.0186855	0.341809	0.266222	0.16459	0.282944	0.233046	0.199195	0.037392	0.470507	0.183441	0.29077	0.300426	0.315838	0.262217	0.170153	0.406316	0.147483	0.328899	0.358303	0.303994	0.108396	0.197174	0.239033	0.267193	0.249441	0.335966	0.300361	0.283288	0.189976	0.2554	0.220618	0.320898	0.1663	0.212384	0.156016	0.0991407	0.187687	0.326489	0.37114	0.313195	0.178032	0.213138	0.149236	0.369653	0.445852	0.378122	0.220351
0	0.161425	0.0551193	0.0325544	0.363535	0.437283	0.0982491	0.225556	0.299172	0.0648105	0.0496059	0.190391	0.244048	0.434372	0.463383	0.319872	0.289503	0.480789	0.161839	0.504012	0.417942	0.429112	0.328387	0.118633	0.200502	0.253629	0.342281	0.541912	0.503376	0.347976	0.307276	0.606889	0.559872	0.217736	0.299157	0.0763917	0.127662	0.757711	0.678455	0.78127	0.526688	0.240525	0.324199	0.0943159	0.038241	0.0731267	0.127361	0.441649	0.684971	0.279064
0	0.299087	0.131715	0.085471	0.765898	0.72165	0.434384	0.748565	0.717579	0.220366	0.159758	0.886831	0.586097	0.895941	0.680067	0.696942	0.869264	0.339428	0.71383	0.520078	0.979649	0.972501	0.655273	0.429674	0.228803	0.602134	0.81202	0.742528	0.673381	0.643888	0.896134	0.646618	0.905967	0.634533	0.844579	0.402693	0.41323	0.655376	0.578694	0.875017	0.769744	0.965584	0.816259	0.559825	0.497412	0.375311	0.710107	0.880377	0.852524	0.700008
0	0.117687	0.0230047	0.0366215	0.195103	0.158229	0.210444	0.160366	0.215803	0.207597	0.0654591	0.345444	0.126814	0.280155	0.239723	0.279246	0.256744	0.127806	0.234436	0.0630724	0.190904	0.249642	0.174622	0.133372	0.0871743	0.280802	0.290168	0.114346	0.271307	0.118415	0.197414	0.146256	0.218729	0.244649	0.243151	0.122467	0.197139	0.0789055	0.0445224	0.107893	0.192711	0.292226	0.255003	0.187679	0.129681	0.182177	0.232983	0.160664	0.295436	0.217091
0	0.25468	0.189405	0.0400571	0.956925	0.704141	0.253574	0.793468	0.459809	0.126779	0.0582187	0.778907	0.439813	0.617527	0.59801	0.674052	0.580011	0.372461	0.801188	0.236399	0.678035	0.810018	0.831659	0.33569	0.362647	0.494935	0.60919	0.608937	0.686562	0.700795	0.77689	0.545831	0.639235	0.468701	0.516728	0.309157	0.415777	0.321113	0.219468	0.449175	0.709701	0.637624	0.764895	0.240835	0.204333	0.303409	0.417076	0.789721	0.568404	0.516424
0	0.217933	0.137415	0.0475835	0.77926	0.795134	0.233477	0.701508	0.371647	0.0835424	0.0718508	0.644582	0.398206	0.722486	0.72298	0.6656	0.614524	0.451756	0.669063	0.423622	0.864949	0.876688	0.598735	0.301841	0.474373	0.426288	0.583219	0.722345	0.78726	0.708009	0.963601	0.644854	0.927884	0.416635	0.551826	0.205465	0.315489	0.379541	0.371518	0.553471	0.712194	0.773002	0.857721	0.286299	0.218672	0.276047	0.323585	0.877227	0.541412	0.576651
0	0.163904	0.028181	0.0261388	0.243327	0.235047	0.12387	0.125074	0.255943	0.238041	0.0412327	0.205	0.135352	0.288139	0.234908	0.351317	0.1765	0.374636	0.187233	0.572911	0.302015	0.26469	0.200143	0.128988	0.150647	0.221954	0.402289	0.217796	0.451167	0.177897	0.277446	0.383251	0.515335	0.187613	0.227117	0.0666735	0.116249	0.614759	0.696696	0.638944	0.295507	0.216492	0.261198	0.14993	0.124778	0.0867673	0.118668	0.237774	0.472602	0.454833
0	0.172114	0.0231638	0.0333147	0.300173	0.250061	0.147008	0.11117	0.377108	0.493455	0.0554858	0.177664	0.149307	0.376798	0.263008	0.435099	0.158563	0.44158	0.243656	0.815802	0.366899	0.321954	0.2189	0.174308	0.14431	0.247225	0.520219	0.250607	0.607531	0.158229	0.290119	0.503711	0.665194	0.241841	0.275378	0.0608829	0.110556	0.542329	0.738962	0.58434	0.207885	0.153939	0.306325	0.089806	0.094244	0.0716284	0.147084	0.232536	0.596988	0.445884
0	0.161297	0.029744	0.0239098	0.225469	0.230294	0.116625	0.129417	0.217897	0.158091	0.0367843	0.213525	0.130992	0.260392	0.226334	0.325038	0.182125	0.353722	0.169499	0.496932	0.281796	0.246836	0.194263	0.114812	0.152584	0.213994	0.365252	0.207504	0.402213	0.183995	0.273505	0.345677	0.468617	0.170616	0.211985	0.068467	0.118015	0.637449	0.683387	0.655982	0.323026	0.236058	0.247078	0.16875	0.134308	0.0914722	0.109736	0.239426	0.43379	0.457512
0	0.145708	0.0443127	0.0195538	0.305743	0.378214	0.172702	0.327245	0.178415	0.0654347	0.0334056	0.416598	0.190048	0.200344	0.327204	0.302682	0.189012	0.149101	0.330971	0.0727871	0.165935	0.301913	0.351349	0.120659	0.408984	0.203778	0.232056	0.182125	0.207412	0.242735	0.165909	0.187541	0.211195	0.128616	0.263463	0.123945	0.224184	0.141466	0.0812432	0.17024	0.32512	0.264027	0.317018	0.0874708	0.164928	0.147587	0.225176	0.261895	0.242696	0.246263
0	0.179665	0.0334685	0.0351029	0.293801	0.335273	0.129083	0.269622	0.192537	0.113864	0.066387	0.233713	0.159842	0.314039	0.241991	0.275643	0.22299	0.375704	0.118788	0.3112	0.267016	0.255692	0.276618	0.127825	0.151814	0.190685	0.422034	0.327095	0.428334	0.213458	0.207284	0.33469	0.386629	0.28905	0.252522	0.0797677	0.166776	0.553708	0.564589	0.606473	0.330871	0.218705	0.216975	0.113139	0.0623309	0.0798615	0.0864681	0.278298	0.422299	0.351499
0	0.147074	0.0514547	0.0211738	0.383575	0.424127	0.0952132	0.227925	0.277749	0.0579121	0.0381011	0.201661	0.226458	0.375633	0.30191	0.27989	0.293089	0.405747	0.159586	0.553998	0.375866	0.372339	0.327288	0.10297	0.207039	0.240491	0.334523	0.495838	0.448917	0.365421	0.264177	0.415892	0.424752	0.222505	0.248201	0.0845343	0.130658	0.715759	0.608908	0.734333	0.423309	0.250729	0.283786	0.101752	0.0379319	0.08518	0.123603	0.358979	0.530544	0.278541
0	0.169266	0.0249669	0.0307224	0.280049	0.24482	0.138768	0.116142	0.33418	0.402446	0.0503801	0.187469	0.144319	0.345197	0.252538	0.405355	0.164933	0.417642	0.223701	0.729149	0.343592	0.301406	0.212234	0.15814	0.146663	0.238321	0.478448	0.238959	0.551834	0.165357	0.28555	0.460516	0.611404	0.222565	0.258235	0.0629854	0.112617	0.568099	0.724063	0.603908	0.238918	0.176256	0.290235	0.11123	0.105182	0.0770923	0.137035	0.234377	0.552413	0.449323
0	0.203991	0.0359584	0.0336418	0.244224	0.204544	0.119262	0.151669	0.166046	0.100736	0.0544343	0.209839	0.131116	0.232644	0.203405	0.237769	0.228687	0.293729	0.142511	0.316661	0.291433	0.256344	0.219745	0.0974728	0.101317	0.187621	0.325407	0.180313	0.410064	0.144419	0.23353	0.248846	0.383013	0.164814	0.238831	0.0608199	0.11036	0.549825	0.490374	0.513778	0.273466	0.224079	0.22928	0.184908	0.10269	0.0747641	0.093158	0.190573	0.420439	0.353602
0	0.191001	0.0322248	0.040892	0.27379	0.233577	0.1112	0.179202	0.15557	0.08007	0.0806855	0.21167	0.125327	0.253239	0.210001	0.360941	0.214781	0.262297	0.193943	0.411552	0.315088	0.290904	0.197734	0.12515	0.0943006	0.212326	0.335957	0.203832	0.419685	0.168753	0.221683	0.272116	0.383023	0.234806	0.242608	0.0722069	0.141818	0.373216	0.351402	0.408253	0.263722	0.21119	0.214655	0.150859	0.0906728	0.0808124	0.0891458	0.202857	0.368148	0.35413
0	0.204355	0.0356079	0.0341854	0.24285	0.188966	0.11027	0.143776	0.166377	0.098599	0.056799	0.190175	0.128575	0.251621	0.211441	0.211885	0.211355	0.274847	0.128471	0.303408	0.28549	0.257341	0.20908	0.0945922	0.0780863	0.188454	0.316872	0.198686	0.423896	0.134957	0.211974	0.258415	0.357612	0.161147	0.229966	0.0521179	0.10118	0.45026	0.403877	0.414902	0.232253	0.187091	0.221697	0.160817	0.0748218	0.0627794	0.0804433	0.180103	0.401093	0.308631
0	0.194344	0.0517697	0.061008	0.28301	0.412582	0.113253	0.231961	0.303343	0.101705	0.0822366	0.172948	0.248604	0.528147	0.769818	0.390325	0.251709	0.617187	0.147404	0.327291	0.464725	0.504734	0.309765	0.157681	0.158299	0.254798	0.371505	0.567063	0.61454	0.238697	0.378342	0.968066	0.839256	0.216626	0.396205	0.0519	0.129469	0.774226	0.790668	0.809	0.69046	0.199771	0.394525	0.0807843	0.042683	0.0448682	0.115741	0.562253	0.946687	0.290642
0	0.268167	0.198469	0.0703718	0.8668	0.930914	0.220018	0.598146	0.552371	0.126676	0.150005	0.608096	0.426165	0.829672	0.586521	0.84709	0.52276	0.609597	0.521251	0.425516	0.824953	0.834675	0.504361	0.318927	0.584345	0.555934	0.820179	0.981382	0.847819	0.544164	0.758461	0.806681	0.783652	0.81628	0.501718	0.343354	0.425805	0.336847	0.386537	0.668229	0.774069	0.579285	0.679161	0.168169	0.243554	0.208906	0.326528	0.84043	0.673474	0.460833
0	0.110436	0.0211727	0.0191832	0.113698	0.113302	0.0464813	0.0628692	0.119192	0.0189878	0.0328163	0.0837279	0.0770628	0.264079	0.146963	0.115091	0.115233	0.166235	0.0542209	0.225437	0.134208	0.117365	0.0875173	0.0467544	0.0437439	0.14504	0.210857	0.209122	0.226133	0.100432	0.130354	0.210558	0.205664	0.0990715	0.0850773	0.0261517	0.0662306	0.176478	0.216464	0.192247	0.134216	0.0946925	0.125656	0.0810399	0.0405497	0.0611687	0.0264186	0.122096	0.174516	0.256659
0	0.0906097	0.0248025	0.0271098	0.116955	0.13149	0.052383	0.0693325	0.14583	0.0787306	0.0408977	0.0735028	0.0946373	0.328995	0.187326	0.112979	0.150843	0.170623	0.0510393	0.203145	0.139079	0.125297	0.121593	0.0717406	0.0421576	0.141035	0.180089	0.249275	0.212631	0.0825084	0.162895	0.227648	0.280804	0.110916	0.105187	0.0196618	0.0715812	0.167042	0.154846	0.166956	0.178219	0.0912684	0.145674	0.0649569	0.0396434	0.0598982	0.0248825	0.114562	0.21573	0.240634
0	0.086469	0.0464617	0.0297942	0.297743	0.34613	0.11459	0.241889	0.217599	0.125507	0.0552189	0.35054	0.143367	0.315818	0.319862	0.436425	0.28467	0.196581	0.33035	0.151373	0.348923	0.275821	0.148482	0.158485	0.211903	0.310011	0.369116	0.237511	0.422462	0.404809	0.283241	0.291834	0.435785	0.429237	0.254718	0.198865	0.269922	0.0653997	0.0770311	0.158368	0.405459	0.403943	0.22227	0.127499	0.213464	0.133394	0.233511	0.374542	0.362785	0.246472
0	0.205833	0.0877242	0.030998	0.465975	0.715009	0.216595	0.589063	0.429645	0.0952143	0.0481151	0.63946	0.376024	0.475925	0.590429	0.649577	0.454734	0.341483	0.527429	0.267357	0.515436	0.766812	0.596937	0.204494	0.642783	0.348801	0.451211	0.476209	0.514541	0.562563	0.433293	0.466846	0.417085	0.304669	0.568592	0.219913	0.295984	0.273254	0.181392	0.40916	0.622763	0.633514	0.625338	0.217338	0.160017	0.232909	0.408158	0.875231	0.598473	0.341554
0	0.183543	0.0411563	0.0384935	0.281905	0.348751	0.111816	0.21147	0.195333	0.0566917	0.0819089	0.22051	0.1522	0.279232	0.215039	0.416944	0.190171	0.344903	0.191395	0.475972	0.278973	0.280746	0.222587	0.136927	0.138524	0.212435	0.432649	0.292477	0.397571	0.231414	0.209141	0.368438	0.416514	0.329296	0.244056	0.0905834	0.184842	0.475073	0.473667	0.530573	0.340509	0.207091	0.192501	0.0967834	0.0910919	0.0776701	0.0882334	0.238914	0.335494	0.385836
0	0.190526	0.0321441	0.040924	0.273973	0.234131	0.111002	0.179519	0.155408	0.0794384	0.0809374	0.211791	0.125202	0.253485	0.210167	0.363104	0.214337	0.262011	0.194733	0.413436	0.315217	0.291219	0.197199	0.125554	0.0945203	0.212791	0.336047	0.204265	0.419375	0.16941	0.221713	0.272737	0.38315	0.235753	0.242377	0.0724396	0.142353	0.371273	0.350362	0.407663	0.264103	0.211231	0.214424	0.150405	0.0907619	0.0810435	0.0891109	0.20335	0.367117	0.354787
0	0.155675	0.0486105	0.0544017	0.234376	0.35584	0.104	0.195876	0.294613	0.094777	0.0780819	0.174947	0.248193	0.520229	0.732308	0.346741	0.258218	0.571918	0.127065	0.471664	0.448629	0.46526	0.27072	0.13212	0.137708	0.243072	0.32943	0.524334	0.537246	0.211082	0.356956	0.804148	0.746218	0.214696	0.337389	0.0485559	0.113872	0.696921	0.709206	0.735915	0.583719	0.189069	0.368382	0.0858231	0.0551275	0.0447953	0.105821	0.487133	0.86554	0.244115
0	0.205188	0.0421313	0.022713	0.167627	0.376866	0.108629	0.148386	0.232495	0.0355789	0.0417854	0.133676	0.115291	0.264172	0.210929	0.316897	0.149027	0.326888	0.116931	0.425452	0.224131	0.243457	0.198851	0.0869824	0.0886197	0.150813	0.373278	0.242701	0.26791	0.151928	0.165708	0.464073	0.366739	0.167842	0.208641	0.0444666	0.114368	0.46804	0.62365	0.550035	0.328093	0.122344	0.200418	0.0625341	0.0681267	0.0487957	0.0629927	0.208072	0.407807	0.389832
0	0.148632	0.0294893	0.0202456	0.18617	0.164878	0.0675894	0.0997531	0.166539	0.0268177	0.0351821	0.148354	0.113383	0.298243	0.250085	0.195261	0.111303	0.25566	0.0884363	0.356005	0.222015	0.218607	0.13499	0.0835613	0.0733204	0.209823	0.277987	0.27215	0.373742	0.165079	0.18896	0.343821	0.306631	0.129103	0.143741	0.0380315	0.0856916	0.291355	0.354827	0.315617	0.213055	0.121375	0.196733	0.0987376	0.0443656	0.0546674	0.0465106	0.210762	0.291878	0.304539
0	0.152228	0.0299346	0.0236577	0.131343	0.308902	0.0948205	0.120536	0.21264	0.0655537	0.0402648	0.0951507	0.109536	0.294456	0.278213	0.239926	0.148254	0.3073	0.0885817	0.510824	0.203731	0.208662	0.167606	0.0742228	0.0695533	0.136586	0.297549	0.291974	0.256511	0.123805	0.135825	0.476706	0.38933	0.145129	0.194469	0.0292329	0.0904685	0.409777	0.521497	0.440789	0.309717	0.0988809	0.156618	0.0506013	0.0553712	0.0358435	0.0468681	0.189368	0.374158	0.28471
0	0.165267	0.0258768	0.0237604	0.216853	0.186554	0.107444	0.115201	0.149844	0.0491156	0.0368162	0.199366	0.105818	0.283932	0.240633	0.213447	0.138269	0.257937	0.106479	0.356209	0.215673	0.210479	0.150404	0.0899224	0.0685847	0.195852	0.305027	0.220059	0.358768	0.143834	0.17511	0.299991	0.371467	0.145476	0.188343	0.0453726	0.100162	0.343851	0.425528	0.355544	0.189513	0.150831	0.198678	0.11503	0.0432585	0.0797437	0.0575281	0.182351	0.290626	0.490255
0	0.291305	0.187546	0.0499026	0.93428	0.580948	0.282773	0.680457	0.531216	0.180381	0.0811594	0.717894	0.463679	0.775048	0.489296	0.664126	0.666319	0.432277	0.591996	0.234498	0.690427	0.703786	0.813749	0.32305	0.641589	0.533826	0.715222	0.531629	0.701129	0.73275	0.657686	0.528208	0.632775	0.554569	0.515853	0.326541	0.429174	0.368191	0.284206	0.529866	0.663748	0.601403	0.613605	0.211724	0.137007	0.319776	0.387239	0.661436	0.651273	0.542532
0	0.282541	0.0691594	0.0602112	0.842214	0.432753	0.254023	0.787777	0.63236	0.271409	0.101883	0.821444	0.549462	0.7676	0.558889	0.809282	0.679622	0.584737	0.617159	0.299091	0.731238	0.827463	0.903486	0.33555	0.768683	0.596063	0.852112	0.317766	0.681728	0.742254	0.815415	0.643378	0.77113	0.626936	0.692332	0.380647	0.465688	0.542033	0.381976	0.709496	0.857378	0.728903	0.766683	0.281526	0.152142	0.353914	0.501879	0.822451	0.895823	0.618486
0	0.253759	0.222183	0.0448975	0.901536	0.677985	0.295779	0.66509	0.560381	0.19374	0.0738513	0.727783	0.41165	0.713194	0.466471	0.695391	0.637377	0.368569	0.62452	0.22505	0.665272	0.677764	0.781616	0.322526	0.558453	0.521727	0.673251	0.658725	0.706235	0.659619	0.562653	0.496542	0.578882	0.575426	0.537749	0.337833	0.430604	0.308363	0.246006	0.450893	0.611763	0.593531	0.578022	0.220011	0.170863	0.293111	0.410221	0.638995	0.630806	0.473045
0	0.146694	0.0708221	0.0268813	0.561252	0.329109	0.136661	0.435728	0.163431	0.0300455	0.0515294	0.324674	0.179703	0.315816	0.321337	0.304025	0.218803	0.173187	0.426782	0.136055	0.330867	0.370017	0.318337	0.191286	0.386271	0.206595	0.315226	0.327787	0.412272	0.390161	0.444004	0.27728	0.300032	0.194724	0.246877	0.137671	0.205517	0.0984852	0.0739905	0.149822	0.238126	0.368932	0.340314	0.122483	0.385739	0.158357	0.176422	0.476825	0.221798	0.304611
0	0.211908	0.0408537	0.0308695	0.286446	0.294986	0.125315	0.215777	0.193579	0.049665	0.0435254	0.280638	0.153108	0.32529	0.27879	0.306924	0.210866	0.357513	0.150389	0.415225	0.30387	0.343843	0.263146	0.117939	0.110114	0.22778	0.3611	0.239356	0.421569	0.180416	0.29917	0.365892	0.507881	0.172439	0.286142	0.0624056	0.137336	0.604712	0.585437	0.607297	0.328695	0.221715	0.34003	0.163067	0.0471549	0.104222	0.0856636	0.321117	0.39438	0.731105
0	0.176048	0.0284347	0.0348402	0.26731	0.184104	0.114639	0.130012	0.16703	0.0584679	0.0676555	0.136775	0.13022	0.364563	0.25578	0.213333	0.205912	0.297841	0.105179	0.377088	0.30785	0.248081	0.163254	0.123783	0.0902339	0.19497	0.370988	0.311296	0.404595	0.162728	0.243048	0.35833	0.396273	0.201449	0.159944	0.0553029	0.109975	0.389121	0.489267	0.389132	0.20027	0.141697	0.233017	0.110865	0.0601756	0.0675676	0.0535569	0.1943	0.316365	0.411552
0	0.0894069	0.025929	0.0295987	0.130982	0.20898	0.0964789	0.129944	0.194301	0.102332	0.0479558	0.103355	0.126344	0.356063	0.487882	0.173408	0.170144	0.290508	0.073258	0.544537	0.251084	0.224958	0.154425	0.0656096	0.0852713	0.172694	0.197044	0.339225	0.436579	0.131932	0.175794	0.488821	0.434235	0.156416	0.221981	0.0252396	0.07326	0.345423	0.378424	0.379192	0.298653	0.118149	0.143645	0.0677054	0.0263797	0.042524	0.0495176	0.315656	0.3532	0.165923
0	0.235284	0.147164	0.0286474	0.57736	0.955708	0.200311	0.701943	0.443431	0.0743463	0.0461539	0.658485	0.421243	0.501021	0.621718	0.590903	0.441677	0.339728	0.49319	0.180918	0.453806	0.691396	0.720998	0.249724	0.974822	0.358079	0.475723	0.586106	0.428852	0.717237	0.420351	0.453828	0.387622	0.300946	0.413162	0.248996	0.330032	0.315462	0.214819	0.451624	0.641437	0.546024	0.617452	0.150472	0.159886	0.244872	0.376459	0.842718	0.515103	0.37245
0	0.101674	0.0579877	0.0293739	0.304484	0.40367	0.117507	0.286178	0.229396	0.0983095	0.0542382	0.382861	0.155435	0.334297	0.357299	0.485222	0.291967	0.221727	0.338946	0.167806	0.363149	0.317501	0.166794	0.149322	0.241939	0.321155	0.40953	0.275633	0.45459	0.451912	0.304774	0.337315	0.471157	0.443899	0.268852	0.215386	0.296344	0.0791818	0.0917215	0.189687	0.455375	0.407399	0.241075	0.129578	0.20572	0.135498	0.226776	0.45811	0.378862	0.26411
0	0.119514	0.0650759	0.0330147	0.416055	0.273417	0.102553	0.259882	0.243564	0.137216	0.0554433	0.422672	0.188024	0.312896	0.301727	0.309468	0.262294	0.164867	0.350901	0.0746696	0.274183	0.315197	0.300587	0.200734	0.377121	0.274697	0.321852	0.264745	0.328178	0.344662	0.357935	0.212253	0.350071	0.219793	0.186407	0.152276	0.227616	0.0959487	0.0551502	0.134459	0.295502	0.358333	0.364822	0.184913	0.366377	0.240212	0.281601	0.280039	0.293748	0.293906
0	0.152931	0.111737	0.0595835	0.586459	0.463519	0.204638	0.385905	0.489098	0.077837	0.111157	0.717022	0.440725	0.537049	0.34051	0.614037	0.590198	0.305973	0.570689	0.172408	0.514568	0.521225	0.636219	0.246379	0.379137	0.473377	0.680634	0.371181	0.447654	0.369879	0.48025	0.286402	0.576882	0.800311	0.469677	0.38595	0.506809	0.232643	0.138822	0.280969	0.454396	0.632794	0.507647	0.239919	0.240084	0.355895	0.478278	0.426288	0.591593	0.355643
0	0.191707	0.125613	0.0684952	0.855785	0.699796	0.288807	0.689353	0.822622	0.234084	0.133647	0.774398	0.44568	0.820974	0.591727	0.861545	0.761569	0.501888	0.715294	0.363516	0.763724	0.936086	0.651293	0.326667	0.50157	0.665833	0.714692	0.898681	0.892337	0.758897	0.636457	0.733506	0.695226	0.884595	0.697758	0.362445	0.480787	0.236273	0.256613	0.545757	0.960843	0.738035	0.819854	0.180908	0.299642	0.182036	0.473452	0.942624	0.87227	0.319333
0	0.192577	0.107769	0.0496743	0.776059	0.535398	0.346468	0.537398	0.550492	0.317004	0.0922232	0.701877	0.359898	0.710321	0.503556	0.808971	0.614867	0.299232	0.710503	0.226068	0.588511	0.629551	0.589001	0.233347	0.304094	0.652464	0.720528	0.462903	0.599848	0.565798	0.552156	0.389842	0.492134	0.611518	0.518486	0.336178	0.397048	0.218552	0.181302	0.298016	0.424208	0.797905	0.564007	0.529793	0.103421	0.358101	0.63426	0.657279	0.537579	0.651017
0	0.0663409	0.00157903	0.00195126	0.0568729	0.0584625	0.00149214	0.110899	0.00553584	0.0119997	0.000383166	0.0225391	0.207365	0.0177535	0.000608521	0.049086	0.0633486	0.00707001	0.385059	0.00428598	0.0176387	0.0213485	0.421828	0.104271	0.000518859	0.0907527	0.00662661	0.0237233	0.0253628	0.00162169	0.00397776	0.00447203	0.00720238	0.0170622	0.00443029	0.0142099	0.302916	0.0419604	0.00261586	0.0923976	0.370294	0.00249977	0.0125703	6.35464e-05	0.00349904	0.10742	0.00898165	0.000202232	0.15203	0.00099783
0	0.164205	0.026108	0.0235278	0.214849	0.185172	0.104891	0.114208	0.150898	0.0476965	0.0366868	0.196167	0.106283	0.284755	0.241212	0.212284	0.1365	0.257756	0.105335	0.356159	0.216006	0.210974	0.149424	0.0894832	0.0688683	0.196744	0.303236	0.223289	0.359699	0.14517	0.175937	0.30272	0.367295	0.144378	0.185535	0.0448956	0.0992281	0.340484	0.42094	0.352977	0.191019	0.148969	0.198526	0.114007	0.0433218	0.0781486	0.0568352	0.184154	0.290714	0.478413
0	0.204738	0.0760491	0.0688225	0.49669	0.474746	0.143035	0.465661	0.35805	0.0773328	0.105439	0.762755	0.350638	0.787463	0.924235	0.862722	0.606235	0.434727	0.691695	0.635972	0.740709	0.885505	0.394119	0.25406	0.435607	0.502822	0.673934	0.458987	0.736561	0.389014	0.634087	0.612916	0.733336	0.403631	0.736749	0.205409	0.284497	0.548586	0.437808	0.645285	0.750911	0.964486	0.703746	0.621733	0.513825	0.36295	0.372904	0.895105	0.722064	0.899115
0	0.06559	0.0191219	0.0214758	0.22641	0.185619	0.423937	0.221946	0.220555	0.172863	0.0372332	0.447904	0.176285	0.241336	0.298737	0.368962	0.223909	0.165857	0.378835	0.176779	0.285532	0.364598	0.209204	0.106929	0.206561	0.281338	0.346079	0.146901	0.30852	0.176316	0.231212	0.192193	0.486885	0.207945	0.286923	0.167811	0.185529	0.174573	0.107789	0.18788	0.264719	0.465846	0.327615	0.302766	0.382162	0.149917	0.319757	0.201935	0.310398	0.321491
0	0.0766645	0.00154708	0.00189367	0.044321	0.0916681	0.00139703	0.386772	0.00279	0.0137039	0.000497509	0.0471702	0.403447	0.00478376	0.00100459	0.0711125	0.110185	0.00582112	0.207938	0.000729258	0.0100218	0.0368607	0.819979	0.0598098	0.00318161	0.041185	0.0188497	0.0251124	0.0109653	0.00361448	0.00357053	0.00277289	0.00469621	0.00687548	0.0102633	0.0174645	0.229795	0.0564787	0.000812051	0.0623134	0.409346	0.0072467	0.0186034	0.000980833	0.00815082	0.261694	0.0293349	0.000298539	0.212375	0.00897563
0	0.166338	0.005081	0.00698301	0.136503	0.0391001	0.00508163	0.0637787	0.019802	0.0419756	0.00137874	0.0696465	0.285611	0.0579885	0.00219314	0.0818612	0.129576	0.0253468	0.815561	0.0101829	0.0469128	0.0769705	0.5035	0.333697	5.93073e-05	0.285471	0.0241078	0.01617	0.0592374	0.00034396	0.0142024	0.0159859	0.0205691	0.0609647	0.0111284	0.0509989	0.653853	0.0782516	0.0068711	0.154463	0.241271	0.00910269	0.0451948	0.000215868	0.0126847	0.153839	0.0178631	5.22853e-05	0.0651503	0.00379346
0	0.191004	0.0359682	0.0341255	0.299181	0.32073	0.122543	0.27432	0.196334	0.0940942	0.05866	0.255153	0.163726	0.333419	0.269818	0.286291	0.230759	0.376509	0.12853	0.336578	0.301946	0.312682	0.289351	0.128406	0.143607	0.213462	0.38797	0.308936	0.446877	0.207073	0.266888	0.352646	0.428549	0.236508	0.270474	0.0724987	0.155101	0.584876	0.570632	0.631593	0.351021	0.228884	0.290653	0.142371	0.0535018	0.0900998	0.0881656	0.331825	0.44243	0.478641
0	0.110155	0.0245609	0.0204779	0.241557	0.261773	0.104222	0.132146	0.196424	0.0771412	0.0326317	0.110959	0.115919	0.323714	0.517611	0.178661	0.183465	0.313224	0.0778509	0.484477	0.305706	0.246868	0.211604	0.112388	0.0873333	0.13246	0.182271	0.287585	0.560285	0.110259	0.239167	0.620024	0.544274	0.127289	0.215196	0.019541	0.0793792	0.436672	0.601481	0.452786	0.281098	0.0955641	0.211579	0.0470579	0.0210118	0.0288946	0.0535103	0.264938	0.340862	0.179293
0	0.154048	0.0450826	0.024966	0.360501	0.393916	0.104803	0.242877	0.251243	0.0762573	0.0455332	0.211261	0.206777	0.361023	0.28818	0.273403	0.276416	0.393384	0.146515	0.479579	0.348478	0.340926	0.313866	0.109921	0.19119	0.227341	0.351389	0.448979	0.445853	0.321703	0.249624	0.387714	0.410515	0.235214	0.248942	0.0822012	0.138473	0.663148	0.591513	0.69514	0.394209	0.243418	0.268101	0.107696	0.0426605	0.0850981	0.113355	0.339957	0.505755	0.296311
0	0.144859	0.0717419	0.0270636	0.563191	0.330518	0.129669	0.428704	0.167647	0.0329232	0.0518873	0.325935	0.181442	0.315497	0.311326	0.30124	0.221394	0.172364	0.424068	0.132311	0.329762	0.365546	0.319253	0.19371	0.391676	0.207597	0.315993	0.330949	0.410873	0.396313	0.442792	0.273394	0.304416	0.196896	0.240377	0.136905	0.20657	0.0955744	0.070487	0.145218	0.238415	0.369351	0.338414	0.121049	0.396883	0.163099	0.178445	0.46193	0.223315	0.29922
0	0.270551	0.121761	0.0739307	0.575835	0.863793	0.290024	0.573485	0.522251	0.208448	0.125089	0.676801	0.333047	0.721627	0.509444	0.772746	0.519115	0.498301	0.396915	0.294743	0.584312	0.640167	0.440192	0.215161	0.256266	0.545681	0.850675	0.559043	0.618775	0.579976	0.458492	0.533864	0.576918	0.56748	0.679256	0.298323	0.341945	0.22336	0.262581	0.452908	0.610871	0.497781	0.513803	0.233375	0.194704	0.17292	0.389633	0.630846	0.797624	0.697662
0	0.0578309	0.0177032	0.0226957	0.22621	0.17159	0.413531	0.207311	0.221674	0.184742	0.0397537	0.43702	0.168558	0.25317	0.298407	0.375781	0.232858	0.166784	0.376765	0.180792	0.301149	0.354795	0.185996	0.113597	0.181317	0.290367	0.353094	0.146263	0.324551	0.18492	0.24127	0.196828	0.497901	0.236247	0.28438	0.173405	0.186042	0.164077	0.105513	0.182758	0.2658	0.476633	0.316715	0.304486	0.381681	0.148553	0.320651	0.207875	0.321291	0.322583
0	0.113413	0.0311073	0.031366	0.169243	0.221648	0.119283	0.148444	0.188111	0.0783351	0.0542676	0.13336	0.129107	0.349882	0.506794	0.203652	0.174269	0.278806	0.0866809	0.443808	0.275786	0.250308	0.163835	0.0864809	0.102912	0.193546	0.239642	0.276232	0.537533	0.139149	0.220321	0.479017	0.413455	0.195681	0.224891	0.0395836	0.0914716	0.348418	0.416632	0.415652	0.278718	0.144748	0.173139	0.100961	0.0361678	0.0575254	0.0599892	0.373183	0.342447	0.228893
0	0.0761443	0.0376566	0.0168084	0.303575	0.254003	0.181444	0.276155	0.227848	0.214214	0.0352309	0.462619	0.17417	0.280113	0.296736	0.314474	0.263536	0.169384	0.418245	0.170526	0.351966	0.361402	0.284235	0.0845259	0.12357	0.238347	0.247105	0.229306	0.346369	0.27679	0.264805	0.184232	0.239712	0.237688	0.35647	0.170763	0.208229	0.1658	0.109482	0.196679	0.333312	0.381287	0.290243	0.185982	0.154113	0.120025	0.397565	0.479906	0.396933	0.19207
0	0.1008	0.0609545	0.0267363	0.413491	0.27986	0.142605	0.26377	0.237005	0.152629	0.0476511	0.447445	0.192055	0.311608	0.299211	0.33469	0.256771	0.167525	0.351073	0.0862137	0.263601	0.315161	0.298116	0.186045	0.378545	0.25899	0.337735	0.270166	0.313443	0.350303	0.317256	0.210202	0.3551	0.218051	0.202906	0.156206	0.221756	0.106269	0.0623475	0.144704	0.297867	0.364919	0.346261	0.162722	0.393532	0.221126	0.2629	0.275574	0.311477	0.306958
0	0.30495	0.0606584	0.07492	0.954508	0.413078	0.260332	0.730299	0.674333	0.193792	0.134864	0.736	0.580739	0.955791	0.606342	0.727885	0.815127	0.623162	0.615812	0.344209	0.799108	0.922571	0.800405	0.330501	0.74236	0.661129	0.802375	0.4657	0.814602	0.956617	0.858186	0.72795	0.794183	0.729073	0.602037	0.322908	0.467081	0.424893	0.34929	0.723606	0.999934	0.717578	0.834391	0.17204	0.173964	0.293632	0.401913	0.893158	0.867924	0.538028
0	0.211022	0.106572	0.0254367	0.494123	0.864382	0.186292	0.675209	0.409472	0.0601191	0.0399185	0.644191	0.391726	0.459394	0.635762	0.597265	0.419571	0.334262	0.497027	0.216979	0.46953	0.747568	0.673591	0.229567	0.858578	0.322849	0.43393	0.536004	0.424749	0.662396	0.398713	0.455487	0.371178	0.275441	0.464012	0.233346	0.296812	0.322099	0.210631	0.456577	0.663128	0.582714	0.63908	0.15893	0.155708	0.235134	0.385678	0.912864	0.548371	0.330187
0	0.287044	0.126691	0.0730329	0.610563	0.871448	0.301391	0.58424	0.526027	0.204059	0.123648	0.66528	0.331277	0.724767	0.50104	0.784026	0.53057	0.492613	0.392287	0.282506	0.583451	0.624248	0.475276	0.224753	0.286229	0.560859	0.850008	0.564195	0.628303	0.587522	0.470142	0.539641	0.579578	0.554869	0.641765	0.29597	0.339997	0.240346	0.279812	0.461871	0.58403	0.504872	0.507574	0.242922	0.177526	0.183974	0.398305	0.622535	0.77824	0.735138
0	0.290913	0.158593	0.109398	0.831674	0.753946	0.252235	0.619964	0.468589	0.127247	0.0574943	0.695532	0.423037	0.634655	0.407306	0.706218	0.471655	0.374659	0.553673	0.177991	0.492585	0.564824	0.657057	0.328696	0.703016	0.566483	0.759253	0.644738	0.703602	0.7467	0.511881	0.462097	0.563666	0.644209	0.402698	0.310369	0.498472	0.233318	0.188356	0.394023	0.544566	0.606575	0.466834	0.232148	0.307836	0.265706	0.375711	0.427153	0.470783	0.505771
0	0.178902	0.0284038	0.0274365	0.20096	0.176039	0.122411	0.105183	0.126467	0.0256959	0.0481258	0.149429	0.0976291	0.308382	0.24569	0.192635	0.167774	0.249092	0.0743249	0.285236	0.193566	0.168456	0.131167	0.132894	0.0758778	0.185603	0.356794	0.192136	0.439711	0.116646	0.220968	0.333232	0.333126	0.198614	0.115387	0.0533903	0.114029	0.315826	0.417819	0.323988	0.202827	0.147074	0.189834	0.169525	0.0635635	0.0621819	0.0480289	0.22922	0.290592	0.388112
0	0.164163	0.0290514	0.0311956	0.194156	0.196494	0.138584	0.122999	0.136769	0.0449015	0.0545834	0.14369	0.104424	0.327336	0.341159	0.195961	0.18818	0.258229	0.0745097	0.32203	0.215463	0.183178	0.142105	0.131322	0.0867737	0.180922	0.338456	0.198559	0.49669	0.109858	0.230983	0.384143	0.371559	0.2196	0.147042	0.0531469	0.114639	0.335813	0.437696	0.360795	0.227656	0.154259	0.181631	0.166243	0.0594542	0.0628609	0.0529205	0.288311	0.309363	0.355799
0	0.241339	0.166001	0.0451964	0.755295	0.629344	0.205605	0.467447	0.463052	0.11586	0.0974716	0.599954	0.360521	0.552941	0.378279	0.461518	0.52968	0.291352	0.484085	0.125446	0.440743	0.425494	0.579067	0.323501	0.775441	0.447318	0.562128	0.628814	0.586339	0.678811	0.427179	0.398474	0.484572	0.649451	0.325335	0.303298	0.448929	0.18139	0.154309	0.308205	0.451595	0.465455	0.378407	0.116309	0.128626	0.239773	0.370109	0.451342	0.430392	0.295585
0	0.169241	0.0276728	0.0238581	0.223276	0.220313	0.127559	0.135512	0.150751	0.0596909	0.0341072	0.240968	0.113699	0.239676	0.220059	0.268605	0.183939	0.300062	0.139144	0.378363	0.236198	0.213585	0.180043	0.0966965	0.118983	0.192999	0.325002	0.177701	0.33656	0.162581	0.224931	0.274173	0.42499	0.155353	0.212691	0.0647702	0.120043	0.568578	0.608161	0.573216	0.281616	0.234106	0.217471	0.171749	0.106098	0.103707	0.0873621	0.203876	0.344358	0.568241
0	0.226939	0.0837106	0.0528437	0.490481	0.643697	0.273665	0.503976	0.487731	0.172892	0.0856232	0.643101	0.344729	0.591582	0.519967	0.750687	0.511571	0.4123	0.506573	0.326802	0.587815	0.736382	0.464514	0.187456	0.298705	0.45424	0.628439	0.459876	0.642991	0.483865	0.476961	0.50924	0.525306	0.431633	0.710712	0.236041	0.30939	0.205776	0.186247	0.380591	0.577468	0.626111	0.569465	0.274853	0.174747	0.204474	0.422302	0.74715	0.725868	0.494541
0	0.245589	0.147557	0.086071	0.851872	0.768629	0.21947	0.650039	0.616347	0.161818	0.183987	0.575196	0.527885	0.941102	0.574223	0.888343	0.628351	0.672302	0.596507	0.488435	0.888127	0.874665	0.635866	0.351826	0.665906	0.641167	0.798574	0.829705	0.831477	0.850813	0.813319	0.784946	0.813665	0.843786	0.578223	0.320324	0.472594	0.452962	0.411789	0.769963	0.934762	0.602921	0.681244	0.154593	0.284581	0.254916	0.36161	0.779744	0.838446	0.378889
0	0.216389	0.137568	0.0480806	0.763493	0.799883	0.235011	0.68539	0.367984	0.0843232	0.0729716	0.630602	0.392593	0.734945	0.72088	0.663814	0.61872	0.455239	0.645425	0.434046	0.875886	0.868162	0.580144	0.29835	0.497002	0.420811	0.585486	0.730513	0.793028	0.703338	0.961001	0.645114	0.942657	0.415583	0.552977	0.199714	0.308439	0.383842	0.384229	0.55966	0.699804	0.777217	0.847558	0.288675	0.215185	0.275006	0.315197	0.868458	0.539681	0.580714
0	0.161915	0.0260086	0.0356523	0.272529	0.199252	0.108944	0.138277	0.162533	0.0396429	0.0747411	0.138829	0.126694	0.373926	0.261521	0.273469	0.192815	0.290208	0.126455	0.431307	0.311489	0.256406	0.147009	0.135511	0.0965563	0.208178	0.374317	0.326007	0.395256	0.18173	0.244336	0.378132	0.400242	0.228413	0.15159	0.0617499	0.124935	0.332818	0.461661	0.371568	0.210143	0.141533	0.226657	0.0968647	0.062174	0.0740424	0.0518438	0.208513	0.28532	0.431825
0	0.166833	0.0340141	0.0279436	0.198881	0.359635	0.0924628	0.143582	0.236255	0.0419705	0.0439329	0.118922	0.136864	0.297546	0.287704	0.306392	0.15857	0.37777	0.123313	0.530067	0.276625	0.313649	0.230141	0.0935225	0.0928598	0.147308	0.333221	0.313303	0.360625	0.145546	0.217247	0.566578	0.521789	0.158503	0.210787	0.0358851	0.110927	0.567536	0.631383	0.559186	0.360362	0.118579	0.273673	0.0457644	0.0536439	0.041181	0.0601049	0.193697	0.424948	0.298665
0	0.180416	0.0950829	0.0497101	0.457989	0.359737	0.242213	0.308096	0.394719	0.170147	0.0773413	0.401772	0.323964	0.514984	0.244859	0.441519	0.600039	0.215727	0.405676	0.178999	0.342694	0.351521	0.39776	0.14927	0.249245	0.447243	0.492291	0.534981	0.420834	0.433087	0.303366	0.245133	0.318928	0.404085	0.371102	0.190114	0.257406	0.141791	0.0972897	0.18582	0.272456	0.45621	0.305711	0.232973	0.17536	0.225768	0.279058	0.343177	0.306883	0.425556
0	0.197809	0.114212	0.0720939	0.51708	0.394077	0.267321	0.549401	0.347507	0.181483	0.139859	0.830363	0.351717	0.531095	0.621648	0.549225	0.607118	0.285808	0.423605	0.138669	0.396058	0.495372	0.461986	0.29143	0.374174	0.395294	0.714542	0.279758	0.370547	0.344288	0.397141	0.325137	0.400042	0.814646	0.451367	0.198274	0.305661	0.21116	0.171896	0.353965	0.579702	0.775354	0.482946	0.415054	0.16695	0.409193	0.579476	0.728703	0.48785	0.712432
0	0.107258	0.0260979	0.0258287	0.258975	0.264177	0.0938299	0.218387	0.175874	0.0906059	0.0451651	0.247604	0.179369	0.280778	0.215603	0.285558	0.251227	0.364456	0.163825	0.45033	0.276097	0.29079	0.267112	0.0897147	0.107929	0.212461	0.328323	0.236793	0.237294	0.15831	0.230629	0.253052	0.457542	0.302488	0.226516	0.0817964	0.151109	0.548262	0.396325	0.468592	0.300145	0.178627	0.300699	0.134453	0.0898241	0.0948718	0.0939127	0.170611	0.381829	0.342955
0	0.199296	0.108935	0.0406523	0.636522	0.590981	0.277003	0.85405	0.666211	0.40049	0.0636689	0.968766	0.459803	0.467079	0.494926	0.97727	0.501757	0.457759	0.685105	0.266241	0.644752	0.721672	0.975713	0.352969	0.653053	0.521673	0.876724	0.327612	0.5308	0.378644	0.66241	0.52576	0.703344	0.564311	0.887621	0.482082	0.473067	0.636972	0.400764	0.631177	0.655791	0.781031	0.67497	0.461317	0.214599	0.392651	0.701525	0.750843	0.956047	0.628406
0	0.125853	0.0694411	0.0272468	0.501956	0.313348	0.114698	0.349846	0.20318	0.0904267	0.050463	0.386218	0.188008	0.317881	0.30495	0.314859	0.241064	0.169869	0.38528	0.10217	0.294245	0.336331	0.315959	0.195449	0.398721	0.231085	0.32532	0.30942	0.361722	0.385986	0.385388	0.242848	0.318729	0.207552	0.215497	0.145313	0.216953	0.0958676	0.0629496	0.141638	0.270777	0.358675	0.343358	0.130486	0.394781	0.197027	0.216006	0.373648	0.266795	0.301115
0	0.207784	0.172778	0.0420408	0.86596	0.566585	0.322177	0.583823	0.532717	0.273573	0.0730092	0.712006	0.386724	0.70812	0.48097	0.73835	0.615563	0.302194	0.709906	0.214528	0.626476	0.637167	0.688925	0.276671	0.42516	0.583871	0.691075	0.532258	0.6352	0.6004	0.560563	0.403916	0.51929	0.576491	0.522251	0.340304	0.412235	0.249731	0.187747	0.330407	0.465181	0.712883	0.555994	0.409807	0.118032	0.350365	0.542663	0.624965	0.540457	0.552637
0	0.110603	0.029051	0.0382631	0.250597	0.302499	0.0682485	0.150151	0.243085	0.0642442	0.0501863	0.129704	0.185964	0.373933	0.436967	0.292194	0.201797	0.476211	0.133449	0.687466	0.37921	0.424253	0.283308	0.102463	0.112092	0.169938	0.265748	0.448637	0.535017	0.164177	0.324074	0.675959	0.766244	0.150266	0.226838	0.0286565	0.10718	0.720054	0.60439	0.60231	0.428777	0.13753	0.395606	0.0409941	0.021723	0.0379991	0.0668904	0.222485	0.49741	0.163476
0	0.224491	0.115413	0.0526579	0.752122	0.590799	0.343981	0.557558	0.537991	0.282987	0.0956002	0.69856	0.353663	0.698544	0.490811	0.798548	0.607245	0.323339	0.637278	0.219797	0.57659	0.613883	0.603769	0.235716	0.326749	0.630233	0.72329	0.471772	0.59873	0.562086	0.539786	0.410844	0.499713	0.586825	0.499732	0.328662	0.391158	0.247893	0.21581	0.344874	0.442317	0.748746	0.548704	0.483292	0.109006	0.340395	0.59115	0.644389	0.556167	0.685097
0	0.0787824	0.0397677	0.0158534	0.309789	0.256524	0.185601	0.286834	0.231203	0.215785	0.0336203	0.478268	0.179833	0.281217	0.301027	0.311741	0.262692	0.171054	0.4257	0.171927	0.351633	0.374888	0.301187	0.0796389	0.129615	0.233995	0.245343	0.236993	0.343554	0.275977	0.268826	0.182752	0.23025	0.221396	0.363098	0.170373	0.207539	0.175401	0.113305	0.203761	0.334044	0.378638	0.301824	0.190373	0.15499	0.122762	0.407242	0.497848	0.400086	0.19358
0	0.0910713	0.000936654	0.00307444	0.121457	0.0777521	0.000450958	0.123553	0.00302232	0.0043132	0.000471243	0.0145181	0.299821	0.0239729	0.000322035	0.0692997	0.097015	0.00276607	0.379295	0.00225942	0.0192542	0.0186646	0.63004	0.0904105	0.000467036	0.0602844	0.0107534	0.0426394	0.0365995	0.00332341	0.00557425	0.00760186	0.0129994	0.0258775	0.0063804	0.0068907	0.303628	0.0212615	0.000612548	0.0383528	0.193023	0.00276205	0.0103267	1.68886e-05	0.00522002	0.155875	0.00743726	3.97862e-06	0.124151	0.00555005
0	0.192922	0.122844	0.0628996	0.472017	0.673548	0.168992	0.516098	0.663794	0.316544	0.0779416	0.652773	0.601809	0.582302	0.322751	0.75809	0.792293	0.420736	0.794549	0.319476	0.597997	0.985112	0.759755	0.210613	0.434312	0.621192	0.653616	0.74344	0.410498	0.540313	0.451561	0.37719	0.843481	0.387393	0.905831	0.226579	0.364462	0.453735	0.158856	0.451769	0.849321	0.680483	0.714685	0.228126	0.14347	0.286339	0.542955	0.377776	0.77014	0.345072
0	0.0698597	0.0332507	0.0218356	0.296982	0.249624	0.155065	0.23432	0.216294	0.199767	0.0431898	0.400245	0.15492	0.280945	0.280424	0.326787	0.266437	0.162693	0.380412	0.152649	0.341441	0.302526	0.222472	0.117637	0.136001	0.257183	0.264987	0.207083	0.35294	0.292443	0.2573	0.193492	0.288016	0.29804	0.309905	0.170109	0.213309	0.119963	0.0878942	0.161946	0.326671	0.387287	0.252941	0.163218	0.180942	0.123521	0.342023	0.38608	0.373807	0.200295
0	0.0880681	0.00115165	0.00453547	0.0472301	0.0876968	0.00140826	0.204301	0.00379671	0.00987222	0.000421221	0.023382	0.449	0.0190171	0.00106839	0.0710541	0.110917	0.00645416	0.268583	0.00289905	0.023382	0.0401081	0.791023	0.0736289	0.00498339	0.0549098	0.0139837	0.04724	0.0246637	0.00420223	0.0123438	0.00652264	0.0186691	0.0135747	0.00882269	0.00837372	0.230159	0.0773317	0.00165564	0.0968181	0.46819	0.00472133	0.0276211	0.000440808	0.00602087	0.19391	0.0201358	0.000187141	0.245222	0.00539537
0	0.276394	0.123446	0.0747588	0.60082	0.885196	0.295155	0.575108	0.532548	0.213115	0.126536	0.66137	0.331454	0.737935	0.511889	0.788611	0.521547	0.507429	0.397713	0.29865	0.593092	0.637172	0.440851	0.221038	0.262759	0.563444	0.871813	0.575295	0.634627	0.594889	0.465764	0.54905	0.589229	0.566191	0.68152	0.295113	0.33454	0.218366	0.267616	0.450946	0.597887	0.49364	0.510596	0.230482	0.186448	0.167079	0.392394	0.627476	0.806817	0.720626
0	0.156912	0.0235329	0.0364667	0.259402	0.242266	0.149759	0.124361	0.334537	0.380791	0.0646665	0.176054	0.146415	0.36852	0.281852	0.386968	0.157228	0.407727	0.195713	0.681948	0.330712	0.312842	0.228539	0.14349	0.120096	0.229135	0.459299	0.233748	0.510708	0.147491	0.272135	0.460921	0.582133	0.248287	0.294144	0.0668991	0.117025	0.557962	0.667984	0.60167	0.272469	0.155707	0.298943	0.111717	0.0998139	0.0646137	0.129135	0.267501	0.588846	0.453692
0	0.167491	0.033223	0.0209409	0.191771	0.261202	0.107187	0.13601	0.18029	0.0433809	0.0328658	0.200913	0.121152	0.229006	0.2114	0.294349	0.177515	0.322358	0.138301	0.40028	0.244486	0.225947	0.187214	0.0933605	0.138643	0.188046	0.32783	0.200062	0.313635	0.179378	0.241428	0.335916	0.392601	0.151458	0.193063	0.0644316	0.118656	0.622777	0.660961	0.646811	0.350494	0.228959	0.219307	0.163305	0.132079	0.0860338	0.0884428	0.228279	0.38179	0.444914
0	0.24901	0.149518	0.0627695	0.470587	0.76122	0.292388	0.553326	0.609361	0.430403	0.0949584	0.65263	0.447566	0.775219	0.451893	0.769201	0.612125	0.455577	0.414978	0.28821	0.498289	0.595053	0.642961	0.201597	0.322778	0.624971	0.77012	0.649522	0.603619	0.518433	0.49319	0.498387	0.777502	0.447052	0.641935	0.217878	0.341401	0.31264	0.241422	0.436748	0.598452	0.610832	0.566647	0.239418	0.105174	0.252849	0.352248	0.446936	0.640992	0.586348
0	0.171965	0.033153	0.0247797	0.214186	0.217816	0.110515	0.140426	0.165561	0.0640185	0.0379741	0.220535	0.126864	0.225326	0.211075	0.27303	0.201851	0.315247	0.144235	0.368768	0.265447	0.232706	0.196499	0.095922	0.138633	0.19826	0.317582	0.189289	0.357857	0.177623	0.257418	0.279927	0.397591	0.152586	0.2058	0.0678237	0.117343	0.632122	0.611177	0.628431	0.334045	0.251062	0.228099	0.191713	0.133668	0.0908179	0.0960916	0.225947	0.392589	0.428044
0	0.113647	0.0670633	0.0290429	0.309792	0.448978	0.119803	0.321051	0.238685	0.0768942	0.0534659	0.40831	0.164938	0.348847	0.386777	0.523645	0.297712	0.241527	0.345715	0.180746	0.37435	0.35032	0.181212	0.142107	0.26559	0.32993	0.441351	0.305651	0.479887	0.489002	0.321729	0.373126	0.499009	0.455445	0.279981	0.228396	0.317149	0.0900339	0.103289	0.214347	0.494679	0.41012	0.255883	0.131215	0.199623	0.137155	0.221473	0.523911	0.391522	0.277999
0	0.224342	0.0915571	0.063575	0.69436	0.446768	0.40561	0.457413	0.598138	0.414745	0.106656	0.657609	0.429918	0.797887	0.498603	0.772975	0.663685	0.313385	0.810094	0.279198	0.614206	0.776156	0.596711	0.253617	0.272026	0.725951	0.689952	0.50464	0.554637	0.491682	0.472347	0.361216	0.497682	0.564968	0.720196	0.274913	0.363328	0.234083	0.147237	0.296141	0.467209	0.746906	0.593725	0.45695	0.139744	0.328079	0.549572	0.519032	0.600252	0.526454
0	0.105663	0.066123	0.0275065	0.436884	0.294842	0.0999523	0.268263	0.237699	0.148624	0.0492323	0.442764	0.192792	0.31934	0.297434	0.328968	0.26101	0.166974	0.345691	0.0732225	0.260281	0.304487	0.307836	0.196648	0.399701	0.255451	0.333709	0.284957	0.313803	0.37428	0.325898	0.212215	0.334	0.222728	0.191542	0.154099	0.227216	0.0947987	0.0552858	0.137166	0.303454	0.349207	0.34439	0.139533	0.388637	0.228498	0.2534	0.28379	0.310877	0.300847
0	0.160447	0.0362373	0.0315633	0.322624	0.348157	0.120846	0.27105	0.185852	0.090005	0.0538875	0.260799	0.177297	0.305413	0.260494	0.305876	0.22015	0.383034	0.142536	0.365902	0.291097	0.325419	0.323558	0.110192	0.158125	0.183736	0.374071	0.318025	0.376958	0.236859	0.233233	0.342771	0.415136	0.218708	0.268878	0.0778813	0.149516	0.740781	0.610868	0.696056	0.402222	0.221307	0.268671	0.121538	0.0543914	0.0811136	0.106438	0.285367	0.546678	0.386688
0	0.246954	0.164004	0.0318424	0.614664	0.965335	0.215852	0.693554	0.467013	0.0912653	0.051671	0.664918	0.43296	0.527763	0.602193	0.601303	0.462848	0.344573	0.49916	0.174844	0.457482	0.666287	0.726229	0.253935	0.980294	0.383871	0.502753	0.597239	0.454779	0.72034	0.441117	0.455938	0.408589	0.322377	0.413457	0.253859	0.347669	0.298991	0.209346	0.436435	0.619114	0.539723	0.602196	0.161356	0.163269	0.249518	0.377442	0.795071	0.510458	0.39817
0	0.0821669	0.0415525	0.0226307	0.236032	0.290263	0.0652027	0.142793	0.230527	0.0659517	0.0336796	0.115914	0.18442	0.314229	0.350414	0.227714	0.205796	0.327665	0.119762	0.516439	0.366891	0.365753	0.230868	0.0844737	0.10901	0.174814	0.199468	0.435201	0.493502	0.192419	0.281117	0.469931	0.520498	0.15621	0.21745	0.0307151	0.102893	0.457923	0.366467	0.401177	0.370967	0.168086	0.269297	0.0682647	0.0272557	0.0475135	0.0837455	0.28233	0.389112	0.135747
0	0.144322	0.0286749	0.0240248	0.126874	0.295402	0.0925489	0.117761	0.209358	0.0714532	0.0401834	0.0921448	0.109845	0.300891	0.290492	0.22819	0.150582	0.306314	0.0844957	0.523616	0.202564	0.203817	0.16391	0.0722521	0.0679744	0.136856	0.285062	0.302679	0.259257	0.122352	0.134105	0.475278	0.395258	0.141705	0.193579	0.0273326	0.0870289	0.401982	0.501756	0.426628	0.309198	0.0975018	0.151363	0.0504579	0.0519028	0.0346212	0.0453325	0.190763	0.37205	0.268573
0	0.0914951	0.0241669	0.0256593	0.218879	0.202978	0.0709678	0.143363	0.163868	0.0796163	0.0480767	0.115028	0.109718	0.304214	0.199791	0.179968	0.191178	0.290511	0.0935442	0.46741	0.257312	0.207536	0.168415	0.0803478	0.0769309	0.183126	0.276441	0.307217	0.343442	0.163966	0.162734	0.250706	0.405129	0.27075	0.16314	0.059073	0.117493	0.295615	0.337391	0.289761	0.192454	0.131958	0.190725	0.0840534	0.0509231	0.0459505	0.0568085	0.173715	0.25234	0.225406
0	0.16229	0.116317	0.0339696	0.433883	0.539094	0.175478	0.486798	0.304851	0.0318045	0.0604273	0.48316	0.280485	0.476751	0.443319	0.376359	0.511353	0.264862	0.396387	0.165487	0.384033	0.455552	0.371206	0.152615	0.409689	0.319241	0.346151	0.509667	0.536496	0.578291	0.503073	0.427714	0.370923	0.288653	0.344998	0.160112	0.28128	0.117566	0.100644	0.240235	0.549778	0.470396	0.466605	0.197276	0.262518	0.213929	0.219471	0.792263	0.295051	0.318001
0	0.142235	0.00372666	0.00574882	0.132844	0.051386	0.00356662	0.0780946	0.0143742	0.0296068	0.0010839	0.0511523	0.28884	0.0473405	0.00157661	0.0777627	0.118825	0.0179864	0.677195	0.00765083	0.038165	0.0578132	0.541392	0.25542	0.000158589	0.212879	0.0196295	0.0251346	0.0523733	0.00130785	0.011484	0.0133642	0.0183188	0.0499272	0.0095221	0.0364957	0.541531	0.0593477	0.00484463	0.116651	0.222579	0.00696531	0.0338159	0.000133571	0.0102094	0.152498	0.0140962	3.14669e-05	0.0830655	0.00429056
0	0.175932	0.0285142	0.0267186	0.199417	0.174931	0.117008	0.104627	0.130376	0.0257897	0.0468222	0.149362	0.0991473	0.307267	0.246092	0.192871	0.162163	0.249676	0.0756946	0.292084	0.196238	0.173322	0.13153	0.128022	0.0756041	0.18798	0.348977	0.199848	0.433249	0.121362	0.217771	0.334203	0.330425	0.191733	0.118169	0.0518712	0.111234	0.31336	0.411485	0.323103	0.203854	0.144565	0.190462	0.162628	0.0616798	0.0614323	0.0478857	0.22743	0.29073	0.379792
0	0.239625	0.0908752	0.0669966	0.672347	0.447088	0.415652	0.448827	0.603106	0.422446	0.110291	0.648553	0.440828	0.810348	0.49391	0.763313	0.670318	0.323136	0.80647	0.287019	0.615344	0.798222	0.60251	0.258018	0.272918	0.732736	0.685199	0.514887	0.546063	0.477066	0.454118	0.362244	0.500947	0.549137	0.751391	0.261508	0.355428	0.245641	0.15129	0.309736	0.480434	0.722987	0.594591	0.429839	0.148028	0.31734	0.521311	0.489995	0.617206	0.513882
0	0.130232	0.0251733	0.0186007	0.164708	0.142956	0.0602714	0.086571	0.155379	0.0349074	0.0315652	0.12776	0.0991084	0.2624	0.211179	0.174051	0.102269	0.225649	0.0930665	0.321246	0.201929	0.198505	0.120203	0.073244	0.0650347	0.195911	0.249686	0.243069	0.330098	0.144711	0.164286	0.29805	0.294367	0.11588	0.133688	0.0323475	0.0764184	0.251072	0.298777	0.271227	0.19561	0.107027	0.178031	0.0827679	0.0391221	0.050556	0.0442783	0.17274	0.267973	0.266402
0	0.158836	0.0349789	0.0239359	0.225805	0.297035	0.0936687	0.122589	0.179541	0.0527532	0.0389854	0.175197	0.123267	0.325864	0.267544	0.201486	0.162294	0.331134	0.0837361	0.399267	0.261418	0.255689	0.186918	0.0684794	0.0856663	0.168102	0.288761	0.332848	0.359209	0.191405	0.222787	0.349864	0.402283	0.147804	0.179988	0.0394326	0.0922477	0.466893	0.489083	0.429161	0.253181	0.136293	0.244919	0.0806907	0.0351928	0.0510466	0.0607421	0.243979	0.395244	0.280508
0	0.214311	0.111538	0.0281591	0.555998	0.793103	0.176554	0.588506	0.42545	0.125513	0.0464251	0.583812	0.341265	0.490076	0.589447	0.643878	0.380146	0.30922	0.660023	0.26119	0.535028	0.741873	0.600674	0.2204	0.662665	0.362334	0.450255	0.502212	0.487133	0.598503	0.446718	0.432847	0.380726	0.268735	0.543531	0.222334	0.281892	0.25222	0.177968	0.375194	0.559215	0.520711	0.596894	0.158927	0.164104	0.204881	0.387865	0.867231	0.49473	0.295352
0	0.0936636	0.0348729	0.0350267	0.161098	0.239371	0.102019	0.146492	0.229094	0.0846416	0.0588041	0.14518	0.174023	0.403541	0.580552	0.229173	0.203241	0.359269	0.0924365	0.577571	0.337762	0.317335	0.185607	0.0779455	0.105033	0.202637	0.225386	0.353427	0.498954	0.152075	0.254625	0.51268	0.492086	0.192855	0.23936	0.0370729	0.0857716	0.437005	0.466886	0.493669	0.328833	0.149766	0.231009	0.0829868	0.0440694	0.0512487	0.0700058	0.369531	0.471978	0.177595
0	0.169353	0.0445092	0.0539648	0.275544	0.380117	0.0990666	0.207436	0.284109	0.0898458	0.071974	0.158603	0.228042	0.477977	0.662869	0.360927	0.234876	0.573816	0.14415	0.436217	0.437672	0.480868	0.303628	0.141207	0.144461	0.227673	0.3395	0.530937	0.593467	0.216013	0.361906	0.882795	0.821355	0.19494	0.344389	0.0444791	0.123165	0.761486	0.734778	0.745852	0.611442	0.180014	0.396594	0.0673752	0.0349779	0.0426151	0.100334	0.455496	0.80433	0.251892
0	0.174877	0.025714	0.0342537	0.267253	0.171739	0.107507	0.113459	0.174372	0.0815471	0.0678394	0.112273	0.128904	0.39594	0.270864	0.210395	0.196191	0.306714	0.0970319	0.411989	0.321057	0.250569	0.147886	0.124908	0.0863171	0.19971	0.371326	0.324216	0.398417	0.160509	0.248555	0.391122	0.406195	0.200935	0.140064	0.0527581	0.10604	0.38451	0.51287	0.376208	0.186779	0.121267	0.23654	0.0926659	0.0505047	0.0622174	0.0469758	0.194029	0.319531	0.401751
0	0.196202	0.0551904	0.0324366	0.359289	0.457882	0.125799	0.244822	0.238875	0.0730443	0.0637747	0.242267	0.191085	0.311734	0.248129	0.336496	0.204079	0.431361	0.157468	0.407707	0.282054	0.3001	0.323625	0.124374	0.186432	0.186854	0.455626	0.375758	0.392963	0.289766	0.218655	0.429368	0.473527	0.347889	0.248175	0.106386	0.198244	0.699804	0.662256	0.744471	0.447889	0.206706	0.226626	0.0839162	0.07684	0.0701355	0.103249	0.293921	0.450469	0.378092
0	0.0870781	0.0191536	0.0269758	0.205512	0.171463	0.288232	0.177172	0.210823	0.218931	0.0518254	0.393881	0.141341	0.275462	0.249331	0.324817	0.246299	0.138718	0.262577	0.0958959	0.19883	0.271279	0.180281	0.115309	0.116296	0.263942	0.32045	0.131636	0.264276	0.142561	0.164299	0.154284	0.275157	0.237315	0.266926	0.136153	0.189395	0.106732	0.0635632	0.133718	0.210216	0.332273	0.250173	0.183101	0.212507	0.157965	0.228332	0.167688	0.319482	0.253501
0	0.185705	0.0343745	0.0291999	0.250709	0.299355	0.10157	0.116741	0.193493	0.13213	0.0475318	0.16029	0.128264	0.347919	0.272903	0.203934	0.194204	0.359166	0.089487	0.431789	0.312727	0.281648	0.203338	0.0697592	0.0804188	0.16221	0.299814	0.314292	0.371272	0.173295	0.241421	0.357321	0.445711	0.15707	0.195522	0.0407654	0.0914907	0.552899	0.553006	0.464009	0.246141	0.136572	0.265017	0.0807085	0.032527	0.0441828	0.0689347	0.231569	0.469578	0.248748
0	0.172098	0.0346096	0.0628487	0.125661	0.1445	0.0699537	0.0977001	0.154281	0.100139	0.0725362	0.11248	0.110291	0.323396	0.235039	0.138803	0.160126	0.276227	0.0573317	0.216979	0.220803	0.201804	0.144231	0.104298	0.0482987	0.182473	0.223528	0.205459	0.261979	0.0714451	0.205138	0.273162	0.341831	0.131372	0.29291	0.0435481	0.086561	0.267935	0.236609	0.259029	0.214056	0.112446	0.189404	0.24141	0.131428	0.0740344	0.0442173	0.141001	0.240763	0.317668
0	0.164467	0.0278436	0.02662	0.247182	0.236073	0.125434	0.124136	0.264156	0.255299	0.0421929	0.20316	0.136294	0.294129	0.236759	0.35699	0.175286	0.37915	0.191061	0.589312	0.30638	0.268545	0.201412	0.132049	0.150229	0.223672	0.410283	0.220017	0.461735	0.17658	0.278297	0.391362	0.52542	0.191282	0.230384	0.0662864	0.115868	0.609861	0.699569	0.635266	0.289567	0.212268	0.264246	0.145868	0.122721	0.0857516	0.120596	0.237418	0.48098	0.454254
0	0.263503	0.0782462	0.0735856	0.919867	0.496242	0.27149	0.72133	0.734295	0.211838	0.136018	0.750837	0.541035	0.916101	0.600792	0.775969	0.808159	0.583136	0.658153	0.352978	0.789321	0.93166	0.760413	0.331234	0.663332	0.669976	0.769033	0.602435	0.841072	0.911528	0.78326	0.726998	0.760311	0.78499	0.643214	0.335458	0.4756	0.365164	0.316371	0.666242	0.999865	0.729358	0.832659	0.174564	0.220236	0.257724	0.431444	0.908773	0.883124	0.455946
0	0.271714	0.1769	0.0491487	0.819518	0.881532	0.236825	0.598276	0.41573	0.0895703	0.0839692	0.640012	0.357805	0.752705	0.664482	0.686823	0.556724	0.500586	0.490029	0.38379	0.819852	0.81961	0.470663	0.27848	0.567821	0.430507	0.726079	0.860435	0.832553	0.468198	0.846823	0.727341	0.877799	0.563547	0.482615	0.271248	0.323382	0.307902	0.389575	0.568931	0.632981	0.693901	0.773426	0.244201	0.168207	0.228139	0.286619	0.891765	0.510834	0.623272
0	0.121682	0.0220506	0.0460962	0.173785	0.212156	0.150855	0.141877	0.222336	0.193792	0.0811083	0.165825	0.143516	0.350136	0.380193	0.2918	0.160265	0.365997	0.0967968	0.482228	0.302166	0.317622	0.238147	0.0977982	0.0700999	0.184322	0.319903	0.199314	0.35271	0.114355	0.253408	0.431473	0.510594	0.245412	0.308642	0.0698931	0.12175	0.593345	0.534882	0.613885	0.404647	0.159255	0.285811	0.148944	0.101367	0.0445789	0.0883075	0.323064	0.60659	0.425644
0	0.188916	0.0992232	0.0513386	0.487421	0.36909	0.237066	0.324117	0.389745	0.149591	0.0798619	0.384065	0.325924	0.52161	0.245292	0.441949	0.599777	0.216455	0.405533	0.175077	0.340505	0.35044	0.400946	0.16234	0.278735	0.446964	0.502921	0.548982	0.429379	0.44803	0.322829	0.255844	0.327882	0.403714	0.358268	0.186725	0.257861	0.132826	0.0925636	0.179359	0.261208	0.456285	0.309636	0.226034	0.201497	0.231142	0.252686	0.338018	0.286475	0.439792
0	0.0749672	0.0394952	0.0295099	0.337418	0.26013	0.106105	0.198265	0.21046	0.16577	0.0543332	0.343718	0.145956	0.295053	0.267659	0.34157	0.267884	0.156533	0.325386	0.105047	0.301625	0.236085	0.181326	0.182462	0.240554	0.27806	0.308925	0.208442	0.347017	0.338335	0.272257	0.210465	0.358839	0.341021	0.216257	0.163876	0.223867	0.0590879	0.0521098	0.11386	0.311142	0.381074	0.241764	0.129152	0.282712	0.163488	0.248335	0.244068	0.325876	0.244135
0	0.194306	0.0366529	0.0257076	0.286942	0.49019	0.141519	0.202995	0.287528	0.0216008	0.0389668	0.173121	0.222444	0.357997	0.266199	0.413895	0.247345	0.573496	0.177412	0.959918	0.303474	0.42032	0.369563	0.0882158	0.127876	0.193525	0.491826	0.452056	0.311879	0.306576	0.188375	0.534976	0.652788	0.168442	0.295333	0.0691892	0.110864	0.354195	0.296936	0.986566	0.47441	0.173281	0.281967	0.0915453	0.0255197	0.0320182	0.115361	0.222152	0.811704	0.498232
0	0.135169	0.0240286	0.0410065	0.201216	0.230952	0.153622	0.143047	0.273468	0.220683	0.07773	0.173663	0.14233	0.356693	0.309553	0.318358	0.155403	0.359816	0.127315	0.492034	0.27972	0.300167	0.242149	0.0997684	0.0855497	0.203225	0.372199	0.2097	0.373148	0.132022	0.246731	0.400683	0.465005	0.257261	0.320584	0.0753527	0.126135	0.580308	0.566906	0.626071	0.364594	0.158229	0.288442	0.142867	0.107624	0.0545295	0.103476	0.317155	0.577706	0.464223
0	0.14543	0.00390085	0.00591579	0.133555	0.0497399	0.00376114	0.0752565	0.015083	0.0311859	0.00112215	0.0534394	0.288155	0.0487994	0.00165494	0.0782911	0.120187	0.0189367	0.695793	0.00798743	0.0393456	0.0602573	0.535857	0.265722	0.000139331	0.222406	0.0201837	0.0240418	0.0533581	0.00118201	0.0118529	0.013724	0.0186509	0.0514287	0.00971825	0.038344	0.556384	0.0617255	0.00510885	0.121539	0.224425	0.00722773	0.0352823	0.000140856	0.0105209	0.152287	0.0145119	3.3183e-05	0.0805004	0.00421192
0	0.0781403	0.0433646	0.0222832	0.224953	0.284401	0.06677	0.140204	0.233282	0.067653	0.0348602	0.119986	0.190185	0.324112	0.367873	0.222144	0.212516	0.322099	0.114842	0.515109	0.370003	0.359908	0.220272	0.0818336	0.107535	0.179815	0.194966	0.433978	0.477767	0.193017	0.278481	0.443239	0.491032	0.162227	0.216761	0.0320791	0.100485	0.430347	0.351309	0.391861	0.363634	0.172324	0.256519	0.07461	0.0329448	0.0485522	0.0863431	0.29624	0.40455	0.133686
0	0.250354	0.116166	0.0668905	0.443249	0.721684	0.268268	0.575853	0.453998	0.169639	0.11295	0.771505	0.342079	0.609871	0.481228	0.674648	0.516631	0.426133	0.385266	0.251195	0.520847	0.640881	0.480818	0.18581	0.248846	0.439136	0.6997	0.450281	0.5185	0.483814	0.421894	0.433478	0.492926	0.560346	0.614773	0.318077	0.392016	0.280762	0.249079	0.478411	0.668419	0.53635	0.528536	0.266249	0.231151	0.228673	0.381229	0.644043	0.707307	0.582977
0	0.177514	0.131373	0.0340995	0.401246	0.689106	0.189596	0.548673	0.372519	0.0365431	0.0583911	0.572619	0.338445	0.527026	0.530989	0.441672	0.589936	0.309539	0.402014	0.180648	0.41336	0.541198	0.456591	0.156416	0.52679	0.356849	0.372752	0.580893	0.545973	0.666633	0.496629	0.483444	0.389984	0.315127	0.393042	0.184395	0.310572	0.17065	0.135369	0.320348	0.684605	0.521868	0.546475	0.210503	0.194685	0.237503	0.266344	0.928645	0.367394	0.325845
0	0.147268	0.0722128	0.0270702	0.566868	0.336681	0.131691	0.438775	0.164233	0.0249562	0.052107	0.319592	0.180389	0.316233	0.314606	0.30495	0.2203	0.174697	0.428216	0.138038	0.336142	0.370314	0.317197	0.192183	0.388613	0.206998	0.318109	0.334318	0.42011	0.400727	0.449004	0.280854	0.307164	0.201098	0.245108	0.137951	0.207935	0.0956973	0.0725715	0.147834	0.240144	0.371829	0.336344	0.119938	0.392873	0.157677	0.173769	0.477746	0.220884	0.298859
0	0.264178	0.127356	0.0730954	0.566318	0.865631	0.290944	0.56501	0.553345	0.266526	0.121199	0.657177	0.357306	0.753799	0.504841	0.786951	0.536431	0.504475	0.404672	0.305647	0.577628	0.635285	0.465818	0.214584	0.262532	0.57858	0.861837	0.598158	0.631398	0.582183	0.469322	0.543241	0.636549	0.5463	0.695671	0.277491	0.332915	0.226596	0.254772	0.441496	0.606005	0.513151	0.524769	0.225288	0.17357	0.176356	0.380081	0.590287	0.786524	0.682476
0	0.0932346	0.0472841	0.0206033	0.328266	0.270879	0.196581	0.290486	0.25554	0.210889	0.0397407	0.467696	0.201051	0.315193	0.292664	0.330746	0.313406	0.177868	0.42498	0.175873	0.352973	0.373336	0.315358	0.0867023	0.139609	0.265423	0.279849	0.280272	0.356054	0.296693	0.272306	0.191267	0.240599	0.248922	0.369279	0.173818	0.214456	0.172641	0.112571	0.202964	0.325687	0.391171	0.301067	0.198226	0.151189	0.135107	0.392428	0.480756	0.388681	0.225257
0	0.0802809	0.00142168	0.00273146	0.0452436	0.0904087	0.00140059	0.328905	0.00310926	0.0124888	0.000473316	0.0396263	0.417893	0.00929756	0.00102482	0.071094	0.110417	0.00602188	0.22717	0.00141736	0.0142587	0.0378905	0.810796	0.0641922	0.00375301	0.0455375	0.0173065	0.0321297	0.0153095	0.00380087	0.00635278	0.00396204	0.0091274	0.009	0.00980645	0.0145816	0.22991	0.0630918	0.00107958	0.0732558	0.428007	0.00644583	0.0214632	0.000809576	0.00747535	0.240198	0.0264176	0.000263212	0.222792	0.00784023
0	0.207535	0.0856837	0.0365346	0.527096	0.56847	0.21781	0.450826	0.456919	0.186965	0.0592143	0.566333	0.30999	0.519001	0.516871	0.726408	0.423002	0.315	0.732219	0.340548	0.611837	0.768161	0.478918	0.183193	0.321571	0.406194	0.477683	0.411352	0.625649	0.445471	0.504339	0.444926	0.44756	0.309008	0.706084	0.201311	0.278059	0.170461	0.130661	0.293408	0.483419	0.581727	0.569875	0.241791	0.171713	0.196331	0.42015	0.805702	0.556248	0.305267
0	0.18262	0.0503351	0.0307549	0.429384	0.465005	0.129749	0.279393	0.22456	0.0879425	0.0586555	0.263189	0.191237	0.339672	0.289219	0.306765	0.222033	0.413506	0.158323	0.354543	0.323703	0.337111	0.36542	0.125149	0.200503	0.188111	0.382916	0.395765	0.401208	0.311613	0.239741	0.413429	0.485467	0.317813	0.238382	0.112443	0.195096	0.686889	0.660963	0.786907	0.481215	0.216724	0.26917	0.102717	0.0611156	0.0822803	0.113511	0.347297	0.53873	0.37115
0	0.0752661	0.0120208	0.0141419	0.103084	0.0774372	0.0398532	0.0476446	0.121758	0.0597808	0.0219101	0.0645022	0.0566605	0.158201	0.0947072	0.110733	0.0781361	0.136917	0.107252	0.218225	0.144579	0.138755	0.0759062	0.0439134	0.0407978	0.153561	0.168271	0.158339	0.199267	0.0836241	0.0921647	0.161985	0.260969	0.0790307	0.10291	0.0158373	0.0494037	0.132021	0.135544	0.139485	0.142116	0.0637893	0.123027	0.0343015	0.023632	0.0386635	0.0373948	0.0577545	0.195493	0.156509
0	0.131089	0.0562348	0.0226754	0.372985	0.367334	0.120717	0.299527	0.206244	0.085978	0.0401313	0.41302	0.198217	0.232155	0.269758	0.291583	0.216661	0.150863	0.333437	0.0626826	0.197656	0.289501	0.346027	0.15434	0.433568	0.216156	0.262347	0.235081	0.245342	0.315289	0.223558	0.1841	0.263957	0.161986	0.217084	0.125921	0.227279	0.113563	0.0582657	0.138601	0.310376	0.29339	0.314687	0.0921723	0.287529	0.18518	0.232067	0.219502	0.256337	0.23425
0	0.158395	0.0285074	0.0268125	0.33144	0.216784	0.101871	0.141203	0.203555	0.0521106	0.0542142	0.119551	0.134443	0.385127	0.273723	0.238326	0.191746	0.317447	0.153584	0.514677	0.399624	0.308199	0.183853	0.134408	0.110716	0.209903	0.370755	0.385151	0.461924	0.195751	0.263768	0.469742	0.488361	0.1981	0.168584	0.0538997	0.111538	0.352265	0.519414	0.406132	0.248895	0.129516	0.257762	0.0802489	0.0584809	0.0525874	0.0657324	0.227018	0.358974	0.348604
0	0.19186	0.0563717	0.031084	0.407776	0.482857	0.127326	0.258864	0.239297	0.0738857	0.0606089	0.254839	0.196567	0.326148	0.270976	0.331254	0.210329	0.431517	0.164609	0.396205	0.306736	0.327401	0.353911	0.124188	0.199878	0.186858	0.422883	0.394779	0.391219	0.314543	0.231801	0.437286	0.494882	0.342116	0.242231	0.114199	0.202015	0.718216	0.678457	0.79083	0.48579	0.209943	0.250851	0.0888316	0.0710115	0.0748931	0.111591	0.324921	0.502135	0.379009
0	0.0526361	0.000279939	0.00176982	0.0300725	0.0554914	0.000665919	0.118398	0.000135598	0.000518773	0.000223261	0.00799751	0.19167	0.00590076	0.000373823	0.0413148	0.0492974	0.00118311	0.194538	0.00188465	0.00526179	0.00400045	0.349704	0.0511662	0.00112102	0.023502	0.00505804	0.0256009	0.0124681	0.00204365	0.00165375	0.000866122	0.00632835	0.00164035	0.00294057	0.00135391	0.169781	0.0329605	0.000813951	0.0561474	0.325185	0.0011194	0.00656429	6.60639e-05	0.00432556	0.184932	0.00532608	0.000180968	0.15904	0.0046594
0	0.117221	0.0675117	0.0272533	0.426467	0.324822	0.115828	0.312465	0.238547	0.136088	0.0483574	0.477722	0.196826	0.324923	0.308686	0.337542	0.274641	0.167682	0.349201	0.0779096	0.264432	0.326378	0.320898	0.189164	0.375537	0.261192	0.335828	0.289221	0.320189	0.380855	0.323065	0.213054	0.325059	0.21596	0.23194	0.153465	0.23562	0.105365	0.0644727	0.146154	0.303426	0.370078	0.356934	0.158268	0.368645	0.235386	0.254876	0.320614	0.306369	0.327586
0	0.313153	0.120391	0.0590239	0.678686	0.874262	0.322916	0.795674	0.592822	0.121423	0.0934957	0.825273	0.485445	0.583116	0.489587	0.767576	0.698618	0.514572	0.506211	0.245353	0.617175	0.721421	0.508626	0.266715	0.618183	0.521667	0.851702	0.433432	0.527578	0.507904	0.589907	0.509514	0.666514	0.474011	0.538666	0.40904	0.389303	0.529551	0.35621	0.584701	0.598594	0.649442	0.656001	0.227075	0.16437	0.322105	0.304575	0.620125	0.695258	0.715139
0	0.254787	0.13838	0.105207	0.777495	0.640953	0.233565	0.544748	0.472599	0.110105	0.0714287	0.699155	0.427414	0.614925	0.365841	0.694641	0.506505	0.356958	0.575417	0.182683	0.503859	0.552264	0.648832	0.315426	0.573111	0.560497	0.767212	0.574998	0.651676	0.647034	0.500818	0.412256	0.57879	0.734672	0.423831	0.340133	0.52084	0.231121	0.17376	0.36385	0.519507	0.619502	0.464271	0.229699	0.309088	0.295522	0.40596	0.392337	0.506572	0.460787
0	0.174172	0.0937954	0.0523431	0.766623	0.445715	0.372645	0.485595	0.581831	0.389465	0.0947216	0.68734	0.394102	0.756983	0.514011	0.804693	0.641913	0.281377	0.82199	0.253526	0.610468	0.703718	0.577677	0.239173	0.269097	0.703679	0.705553	0.471004	0.582785	0.539661	0.532186	0.35784	0.486963	0.616936	0.617795	0.318916	0.389259	0.19614	0.13393	0.251512	0.423795	0.825424	0.590883	0.545944	0.112553	0.363333	0.642346	0.614351	0.544597	0.567723
0	0.215131	0.106762	0.0342238	0.609401	0.632257	0.182285	0.445059	0.454233	0.217381	0.0581363	0.514108	0.276593	0.533215	0.513194	0.724275	0.35553	0.285328	0.857823	0.337861	0.632918	0.746058	0.477737	0.196511	0.326981	0.420406	0.477843	0.431979	0.605539	0.472933	0.518975	0.413887	0.416422	0.27725	0.689065	0.202753	0.264856	0.147854	0.125685	0.258819	0.42165	0.479541	0.54249	0.190834	0.17579	0.170036	0.40258	0.795943	0.462476	0.262838
0	0.140034	0.0745343	0.0276706	0.470711	0.40124	0.128216	0.410106	0.197209	0.0347492	0.0522628	0.365696	0.178959	0.335641	0.356267	0.407086	0.252733	0.209725	0.399756	0.160558	0.356112	0.378183	0.271832	0.169545	0.352595	0.258337	0.380482	0.33753	0.455034	0.452174	0.408183	0.33323	0.393989	0.304189	0.263764	0.178827	0.259707	0.098663	0.0898396	0.185042	0.356454	0.387814	0.312474	0.125041	0.315812	0.150585	0.189567	0.526627	0.292374	0.29743
0	0.260519	0.112343	0.0743354	0.574439	0.800828	0.262501	0.548875	0.500108	0.188292	0.123597	0.684351	0.334747	0.749954	0.59813	0.808274	0.535654	0.495295	0.458504	0.370249	0.619427	0.688564	0.423148	0.226074	0.288654	0.55447	0.839254	0.548152	0.653716	0.549932	0.490524	0.562342	0.61293	0.53665	0.703259	0.278249	0.323971	0.281462	0.298394	0.487878	0.63211	0.586328	0.546149	0.310942	0.258145	0.203905	0.389554	0.681389	0.79973	0.759154
0	0.200907	0.0379161	0.0215064	0.162945	0.393461	0.109167	0.138006	0.23168	0.0296135	0.0407978	0.117006	0.108367	0.256959	0.203272	0.310208	0.13562	0.315732	0.113231	0.42951	0.213815	0.24072	0.191917	0.0857379	0.0800382	0.135274	0.373627	0.229441	0.24331	0.135719	0.150259	0.480813	0.355592	0.166504	0.200078	0.0412374	0.111653	0.46299	0.643433	0.529024	0.311567	0.10899	0.192944	0.0522355	0.0755921	0.0437978	0.0570374	0.183563	0.389873	0.382536
0	0.0860813	0.000726844	0.00352871	0.0642378	0.0753602	0.00499385	0.151031	0.000937058	0.00156829	0.000364263	0.0239426	0.42464	0.019196	0.00198399	0.070867	0.0893208	0.00633159	0.359361	0.00308234	0.02303	0.0174467	0.637439	0.125053	0.00285099	0.0508369	0.0115008	0.0431232	0.0426094	0.00397553	0.0146134	0.00756549	0.0163217	0.0107683	0.00992283	0.00571636	0.227883	0.0395312	0.00129942	0.0673193	0.327418	0.00335567	0.0110599	0.000227256	0.00618568	0.182091	0.00898187	0.000110757	0.165521	0.00582775
0	0.224211	0.131186	0.0256158	0.541963	0.946574	0.185565	0.709902	0.421055	0.0582929	0.0409191	0.652381	0.410125	0.475646	0.640245	0.581034	0.421589	0.33513	0.487526	0.186681	0.450318	0.71522	0.716035	0.245728	0.96963	0.333606	0.450076	0.575543	0.404252	0.714293	0.400647	0.451827	0.367727	0.280611	0.412881	0.244382	0.313296	0.331091	0.220012	0.466036	0.662618	0.552003	0.631927	0.140145	0.156675	0.240463	0.375525	0.887927	0.519511	0.348046
0	0.161096	0.026486	0.0391911	0.278894	0.233223	0.103833	0.168027	0.154078	0.0394028	0.0855226	0.177885	0.122132	0.323229	0.241794	0.383677	0.189536	0.267727	0.183909	0.480846	0.317302	0.282975	0.154805	0.143152	0.102357	0.224773	0.35859	0.280429	0.397348	0.196033	0.234305	0.346307	0.395899	0.261242	0.188404	0.0741104	0.149887	0.291422	0.375648	0.370823	0.24805	0.176547	0.213612	0.108775	0.0787663	0.0845705	0.0688094	0.221258	0.293087	0.414825
0	0.0464859	0.000267024	0.00133177	0.029066	0.0581532	0.000527161	0.121787	0.000102036	0.000502257	0.000168002	0.00716651	0.188474	0.00495019	0.000281299	0.0401545	0.0465485	0.000890283	0.200117	0.00190602	0.00550087	0.00301031	0.360647	0.0422763	0.00102042	0.0214192	0.00380613	0.0258447	0.0123805	0.00206527	0.00124443	0.000651749	0.00525141	0.00123435	0.00268306	0.00103392	0.169033	0.0317363	0.000848684	0.0590965	0.348723	0.000842336	0.00493957	5.33014e-05	0.00325495	0.1617	0.00543367	0.000200856	0.165716	0.00350616
0	0.0790281	0.0426922	0.0211196	0.226231	0.282542	0.0691402	0.142605	0.226704	0.0683423	0.0332347	0.115651	0.180693	0.310505	0.357958	0.21597	0.204026	0.302082	0.114688	0.48871	0.359145	0.348448	0.216907	0.0805998	0.108295	0.178039	0.190379	0.421359	0.490674	0.192663	0.26911	0.440712	0.4738	0.160548	0.218718	0.0315799	0.100406	0.408115	0.334529	0.374052	0.355186	0.17066	0.241201	0.0740162	0.0288578	0.0497226	0.0845714	0.302592	0.372191	0.136317
0	0.0757199	0.0352515	0.0238529	0.300495	0.212088	0.320857	0.234001	0.229805	0.171995	0.0418882	0.451195	0.181567	0.275625	0.301877	0.360472	0.240241	0.168157	0.37022	0.145254	0.283958	0.348678	0.237658	0.139725	0.265388	0.277283	0.350539	0.196559	0.317212	0.244948	0.272836	0.201558	0.446735	0.217366	0.254056	0.166514	0.198531	0.148278	0.0911939	0.172336	0.275866	0.435271	0.337768	0.257453	0.397079	0.180181	0.301581	0.235132	0.316348	0.323366
0	0.235871	0.205124	0.0408862	0.887188	0.617341	0.310341	0.616937	0.516781	0.232272	0.0672879	0.713976	0.393677	0.69918	0.462861	0.701768	0.610662	0.319852	0.65978	0.205439	0.634206	0.629676	0.740701	0.296372	0.491133	0.540092	0.68066	0.567253	0.649197	0.612318	0.555648	0.424097	0.535789	0.545047	0.511049	0.336906	0.414563	0.282733	0.213942	0.375846	0.494621	0.643904	0.542225	0.328042	0.127937	0.335075	0.475058	0.602694	0.554319	0.534779
0	0.157501	0.11564	0.0587919	0.629443	0.468319	0.218767	0.392367	0.531722	0.12302	0.11023	0.705157	0.450434	0.584625	0.352048	0.660573	0.629813	0.298086	0.647661	0.190469	0.535063	0.545075	0.655468	0.247993	0.368375	0.528738	0.709238	0.399919	0.464322	0.410924	0.48916	0.295121	0.563058	0.816219	0.494154	0.389999	0.515389	0.219835	0.134938	0.270949	0.443196	0.649039	0.511771	0.268008	0.222962	0.374932	0.51979	0.442956	0.594793	0.376362
0	0.114067	0.0273836	0.0250423	0.255597	0.255185	0.0969421	0.213582	0.178973	0.101594	0.0402847	0.246104	0.182356	0.276992	0.212843	0.247299	0.259405	0.370976	0.149813	0.418666	0.273255	0.285399	0.277368	0.0822397	0.10438	0.204496	0.326648	0.229904	0.239717	0.146901	0.23026	0.242099	0.456544	0.287322	0.230221	0.0779627	0.142093	0.58433	0.41486	0.479657	0.294186	0.177406	0.306016	0.141965	0.0882841	0.091135	0.0945857	0.161643	0.399706	0.331518
0	0.112762	0.0644736	0.0262679	0.424132	0.313561	0.10485	0.277922	0.230796	0.132818	0.0468608	0.438349	0.195468	0.29873	0.291528	0.319467	0.249972	0.163337	0.343281	0.069729	0.243782	0.302796	0.320817	0.186716	0.412565	0.245195	0.316981	0.274972	0.296113	0.360898	0.30243	0.205394	0.316164	0.204472	0.197072	0.14693	0.227328	0.100414	0.0561057	0.138188	0.304925	0.334646	0.340088	0.128256	0.366977	0.219784	0.248332	0.269221	0.297114	0.286204
0	0.1334	0.0308094	0.0264057	0.191045	0.301446	0.0956132	0.120476	0.184787	0.0862263	0.0406242	0.145614	0.122886	0.346326	0.318881	0.17786	0.183091	0.345556	0.070092	0.497375	0.250857	0.235462	0.185521	0.0588817	0.0789369	0.143308	0.253963	0.375643	0.326866	0.171495	0.197875	0.39265	0.451083	0.142109	0.19462	0.0299385	0.0823861	0.481098	0.481104	0.425006	0.285372	0.123437	0.212466	0.063196	0.0275723	0.040304	0.0555062	0.240612	0.416249	0.219882
0	0.0941085	0.0365485	0.0401461	0.189234	0.271166	0.0782109	0.1368	0.262398	0.0738001	0.0612569	0.157059	0.220189	0.446915	0.561145	0.275689	0.240233	0.480823	0.10801	0.722575	0.400565	0.404627	0.234285	0.0914837	0.104208	0.198065	0.255957	0.444835	0.453097	0.160596	0.319384	0.571011	0.654986	0.184084	0.225146	0.0361446	0.0941268	0.623993	0.575137	0.598108	0.400251	0.154729	0.352311	0.0713897	0.0537219	0.0417069	0.0779057	0.289098	0.615188	0.158341
0	0.107769	0.0268431	0.0233407	0.25716	0.284349	0.0976722	0.219306	0.190975	0.0916541	0.0371413	0.244149	0.192281	0.289867	0.219341	0.266363	0.260557	0.401701	0.153322	0.487468	0.271669	0.299512	0.291177	0.0807169	0.109319	0.206592	0.342049	0.257756	0.22065	0.16416	0.227337	0.270842	0.485894	0.29148	0.232545	0.0797996	0.143666	0.569517	0.400746	0.530273	0.317185	0.172749	0.313287	0.132288	0.0829221	0.0887963	0.096727	0.165539	0.432837	0.349546
0	0.130075	0.0482956	0.0231366	0.344443	0.308298	0.200773	0.359706	0.216177	0.168419	0.0393942	0.507687	0.200841	0.33583	0.475751	0.406574	0.31106	0.189824	0.451518	0.148114	0.304432	0.409372	0.323042	0.142605	0.287382	0.256942	0.343046	0.216712	0.280516	0.260796	0.302599	0.241371	0.270465	0.19173	0.330655	0.187662	0.226177	0.153645	0.10929	0.207679	0.310781	0.347661	0.409646	0.202456	0.199622	0.181952	0.315468	0.518091	0.317681	0.374612
0	0.174684	0.0411236	0.0605493	0.253737	0.339673	0.124016	0.195089	0.262271	0.204094	0.0801174	0.167	0.22222	0.480891	0.725993	0.377434	0.231627	0.579696	0.139635	0.457704	0.472648	0.474705	0.274526	0.166261	0.136332	0.23302	0.35814	0.455871	0.593626	0.192689	0.363328	0.879642	0.854937	0.213216	0.350421	0.0486349	0.118065	0.717252	0.745426	0.730892	0.601626	0.190658	0.361041	0.0946081	0.0526761	0.0406008	0.109443	0.48456	0.906327	0.296913
0	0.069249	0.021068	0.0220369	0.23399	0.176178	0.413893	0.232553	0.218218	0.181759	0.0378264	0.462715	0.171883	0.264072	0.344021	0.385567	0.228012	0.17127	0.379044	0.175696	0.287199	0.372871	0.210172	0.112405	0.201567	0.285914	0.354473	0.149842	0.311975	0.1764	0.246562	0.207066	0.466125	0.210567	0.294665	0.175824	0.187969	0.176583	0.115071	0.201478	0.274679	0.457178	0.343964	0.301617	0.35025	0.153247	0.317128	0.260887	0.322875	0.35306
0	0.228733	0.127872	0.0718887	0.549374	0.784476	0.199159	0.538939	0.667621	0.321489	0.100588	0.618674	0.545349	0.669319	0.351194	0.769718	0.7416	0.462073	0.671087	0.282727	0.588089	0.864071	0.693121	0.234591	0.419166	0.654123	0.774986	0.760736	0.474567	0.588363	0.411785	0.426846	0.806797	0.481211	0.807795	0.259538	0.371597	0.402821	0.199926	0.467226	0.77353	0.58407	0.625783	0.189217	0.152726	0.235607	0.468134	0.342502	0.780244	0.48434
0	0.214218	0.181951	0.0905828	0.806606	0.911045	0.210463	0.619221	0.610639	0.15562	0.196235	0.530736	0.493731	0.913135	0.555251	0.951163	0.558329	0.665725	0.602374	0.528639	0.901151	0.850989	0.56863	0.358741	0.614596	0.635407	0.786378	0.987889	0.842185	0.797839	0.764159	0.792497	0.801287	0.894505	0.577382	0.323392	0.478609	0.435645	0.414363	0.754244	0.899794	0.56935	0.621992	0.152473	0.337743	0.230967	0.358112	0.733718	0.82078	0.304307
0	0.083396	0.0401288	0.0196471	0.237937	0.284874	0.0711123	0.138561	0.223043	0.0676782	0.0303949	0.112734	0.172178	0.307435	0.367308	0.209071	0.203902	0.306736	0.109747	0.488837	0.355837	0.336216	0.221758	0.0885682	0.103759	0.165534	0.186083	0.407722	0.498307	0.180347	0.26926	0.471431	0.495443	0.149635	0.21411	0.0284305	0.0978478	0.421613	0.38335	0.383821	0.346815	0.157892	0.243829	0.0671589	0.027098	0.0443484	0.0806541	0.281886	0.367868	0.138732
0	0.168755	0.0331832	0.0298739	0.273717	0.432147	0.117505	0.182491	0.276354	0.0344915	0.0422815	0.150722	0.209221	0.364024	0.31924	0.375255	0.232043	0.548436	0.163274	0.890528	0.328261	0.423262	0.341567	0.0936231	0.120549	0.185141	0.421971	0.458482	0.39295	0.259207	0.231582	0.596696	0.706975	0.161157	0.27205	0.0542687	0.108752	0.450295	0.383416	0.862911	0.458342	0.157741	0.321154	0.0712577	0.0212846	0.0315268	0.097297	0.216072	0.705253	0.386207
0	0.261719	0.139784	0.108437	0.790831	0.653345	0.23639	0.557434	0.468766	0.112442	0.0682649	0.698741	0.424662	0.619062	0.369125	0.699326	0.497401	0.360785	0.572504	0.182714	0.502523	0.554242	0.647151	0.320142	0.586837	0.564941	0.771566	0.588516	0.667267	0.666522	0.502771	0.421668	0.578851	0.726508	0.419382	0.335918	0.519809	0.231304	0.176485	0.370033	0.524481	0.620347	0.461794	0.231329	0.313729	0.28984	0.400021	0.391713	0.49893	0.469882
0	0.171783	0.0598712	0.0249109	0.310364	0.436782	0.244936	0.526311	0.219237	0.085844	0.0412538	0.644061	0.195399	0.350725	0.441185	0.411709	0.326939	0.175088	0.365328	0.122534	0.281993	0.440327	0.349422	0.131193	0.19042	0.295616	0.339473	0.255981	0.342066	0.345076	0.280456	0.234818	0.25656	0.191878	0.469035	0.16352	0.270404	0.174234	0.133776	0.222817	0.319352	0.463642	0.416639	0.261518	0.156694	0.231993	0.262949	0.570187	0.297757	0.490961
0	0.0861289	0.00216363	0.00185577	0.0565911	0.0853375	0.00191777	0.393447	0.00491897	0.018829	0.000644819	0.0572246	0.373557	0.00824631	0.00115522	0.0726579	0.112731	0.00841529	0.276861	0.00144806	0.0114162	0.0416284	0.783322	0.094774	0.00221815	0.071967	0.0210003	0.0174614	0.0138807	0.00297994	0.0025531	0.00357081	0.00292504	0.0126359	0.0108017	0.0248542	0.289993	0.053563	0.00143048	0.0654699	0.36848	0.00823869	0.0197851	0.00102774	0.00940963	0.265898	0.0303556	0.000295637	0.181969	0.00927088
0	0.20365	0.168358	0.0853568	0.814238	0.864294	0.227992	0.63768	0.670017	0.177263	0.187466	0.581345	0.487904	0.902993	0.56743	0.941458	0.612692	0.636984	0.635458	0.503719	0.88324	0.880895	0.590176	0.353555	0.587728	0.64853	0.766976	0.976255	0.857238	0.80318	0.740543	0.786824	0.782702	0.902054	0.615858	0.332022	0.480889	0.398056	0.383818	0.718174	0.931524	0.608436	0.672155	0.156121	0.333563	0.2192	0.38747	0.788932	0.851332	0.293807
0	0.203161	0.131337	0.0698389	0.518115	0.725877	0.148564	0.519561	0.741521	0.386031	0.0855449	0.595975	0.662803	0.633453	0.263238	0.758739	0.861984	0.435296	0.816262	0.272927	0.581505	0.982059	0.836071	0.241318	0.505626	0.704195	0.71874	0.860962	0.388247	0.581757	0.384409	0.359709	0.928157	0.431275	0.870889	0.238013	0.391816	0.505264	0.163875	0.476026	0.865797	0.636821	0.688626	0.168425	0.131439	0.27599	0.507229	0.184789	0.75856	0.35526
0	0.332305	0.144401	0.0766814	0.703347	0.777836	0.315684	0.628262	0.482674	0.148385	0.096459	0.688535	0.348526	0.650568	0.429917	0.750691	0.552264	0.405511	0.406656	0.193365	0.524246	0.5569	0.654829	0.265653	0.463016	0.555174	0.74607	0.536055	0.625208	0.592564	0.497382	0.48334	0.539307	0.53788	0.423146	0.304373	0.40134	0.330008	0.310377	0.492922	0.517912	0.577848	0.482591	0.293675	0.174749	0.27227	0.41771	0.550549	0.590607	0.745664
0	0.280362	0.212214	0.0409891	0.721461	0.992894	0.260344	0.669538	0.534526	0.139701	0.0674654	0.683335	0.466506	0.604322	0.546294	0.631078	0.523457	0.358444	0.516249	0.157456	0.468005	0.594405	0.741204	0.26599	0.995961	0.457711	0.580134	0.629112	0.529003	0.729223	0.500566	0.461976	0.468614	0.383731	0.414304	0.26778	0.398163	0.251838	0.193677	0.39295	0.555208	0.521685	0.55852	0.192514	0.172956	0.26282	0.380258	0.658667	0.497159	0.471801
0	0.133985	0.0630531	0.0259283	0.430622	0.271831	0.128855	0.251529	0.18811	0.0954657	0.045211	0.398047	0.165114	0.26665	0.309514	0.286356	0.228672	0.149817	0.485044	0.0784975	0.30785	0.300281	0.316861	0.201214	0.443068	0.222995	0.279695	0.223903	0.374927	0.284646	0.325895	0.234756	0.317726	0.188825	0.181699	0.141638	0.220991	0.104174	0.070082	0.141413	0.267948	0.318618	0.316218	0.119563	0.372611	0.207953	0.240389	0.310801	0.26506	0.295008
0	0.143038	0.0951844	0.0453728	0.811467	0.445063	0.352188	0.503085	0.571711	0.373778	0.0873155	0.705789	0.371877	0.731599	0.523572	0.824376	0.628401	0.261513	0.829373	0.237594	0.608149	0.658766	0.565865	0.23021	0.26728	0.689858	0.715235	0.45013	0.600253	0.569435	0.56932	0.355746	0.480311	0.649186	0.554248	0.346222	0.405351	0.172595	0.125673	0.223816	0.396854	0.87415	0.589119	0.601172	0.095679	0.38521	0.699918	0.673503	0.510059	0.593333
0	0.172571	0.0286392	0.0259062	0.19767	0.173678	0.110894	0.103997	0.1348	0.0258959	0.0453471	0.149285	0.100865	0.306006	0.246547	0.193138	0.155813	0.250337	0.0772446	0.299834	0.199262	0.178828	0.131942	0.12251	0.0752944	0.190669	0.340131	0.208576	0.425936	0.126699	0.214153	0.335301	0.327368	0.183947	0.121318	0.0501523	0.10807	0.31057	0.404318	0.322102	0.205017	0.141727	0.191173	0.154823	0.0595482	0.0605841	0.0477236	0.225404	0.290887	0.370377
0	0.156014	0.0314719	0.0206941	0.197951	0.212977	0.0994105	0.128872	0.165561	0.0438339	0.0313916	0.211359	0.122824	0.235705	0.220923	0.271679	0.175394	0.312131	0.134688	0.385326	0.247874	0.221473	0.176809	0.0929985	0.140293	0.204267	0.307283	0.207472	0.341678	0.18742	0.253519	0.302773	0.386123	0.143671	0.18249	0.0649128	0.114067	0.599912	0.60817	0.613121	0.334143	0.237277	0.221874	0.177281	0.128675	0.0900547	0.0881409	0.236094	0.364124	0.432374
0	0.0564253	0.000442507	0.00178264	0.0451362	0.0701608	0.0025779	0.132795	0.000411046	0.000610137	0.000172053	0.0131066	0.298999	0.0109151	0.000990354	0.0532182	0.0623893	0.00309005	0.290956	0.0025977	0.0148725	0.00793494	0.506485	0.0704741	0.00175812	0.0328247	0.00531895	0.035329	0.027932	0.00304113	0.0074835	0.00384031	0.00939685	0.00539555	0.00576585	0.00238022	0.196341	0.0333139	0.0011436	0.068176	0.373491	0.0014915	0.00523283	9.09568e-05	0.00292218	0.132274	0.00665329	0.000181903	0.175058	0.002701
0	0.0783838	0.00109212	0.00186751	0.0825285	0.0871431	0.000679273	0.285155	0.0019021	0.00764332	0.000451107	0.0316181	0.343693	0.0105518	0.000551299	0.0695654	0.101698	0.00302287	0.263717	0.00075796	0.0111611	0.0241001	0.733964	0.0609877	0.00151815	0.0374053	0.0148397	0.0317668	0.0206872	0.00351851	0.00272141	0.00420569	0.0062671	0.0137317	0.00827651	0.0113396	0.249926	0.0321894	0.000257678	0.0385731	0.286655	0.00505054	0.0111421	0.000566687	0.00662785	0.218824	0.0191267	0.000163804	0.16483	0.00790025
0	0.127359	0.0188637	0.0640169	0.248776	0.256658	0.13501	0.149517	0.183144	0.324109	0.085426	0.1718	0.162727	0.373384	0.607401	0.377429	0.224293	0.494454	0.139749	0.793261	0.513595	0.421577	0.213434	0.206324	0.149867	0.185225	0.38646	0.271413	0.590826	0.143094	0.371153	0.570757	0.762292	0.266725	0.235711	0.072996	0.119817	0.603718	0.714137	0.63127	0.45659	0.172487	0.31056	0.113808	0.0716542	0.0391636	0.109359	0.330408	0.715862	0.269698
0	0.153761	0.0328528	0.0264486	0.229481	0.326843	0.109306	0.148938	0.168377	0.056157	0.0417154	0.183525	0.118276	0.297428	0.256151	0.200592	0.166301	0.342341	0.0805282	0.39551	0.251814	0.256241	0.193628	0.0596161	0.0929948	0.142602	0.276311	0.328402	0.363669	0.206236	0.219424	0.357564	0.521439	0.139872	0.176761	0.0413543	0.0946079	0.592165	0.601231	0.498798	0.255346	0.137621	0.243877	0.0764837	0.0296908	0.0489077	0.0620974	0.237735	0.407889	0.330754
0	0.209828	0.0489549	0.0249491	0.180529	0.348404	0.107682	0.165002	0.230979	0.0475709	0.0434129	0.165214	0.127778	0.281154	0.227962	0.321114	0.174165	0.348484	0.120912	0.418461	0.24519	0.250089	0.211518	0.0874241	0.103292	0.17662	0.367789	0.272746	0.314538	0.182561	0.196444	0.42897	0.390986	0.169499	0.222459	0.0496355	0.117775	0.48241	0.586517	0.581633	0.352525	0.146183	0.217425	0.0803833	0.0531963	0.0572262	0.0733458	0.252664	0.440662	0.394482
0	0.16461	0.0312899	0.0241549	0.201818	0.171701	0.0795321	0.112279	0.166486	0.0474423	0.0411327	0.160711	0.117633	0.28386	0.238724	0.199915	0.139477	0.26079	0.0999497	0.34039	0.239597	0.229595	0.156328	0.0863293	0.0745216	0.203745	0.288298	0.250229	0.388053	0.1563	0.195073	0.318689	0.320517	0.137649	0.168763	0.0419533	0.0899435	0.336698	0.367639	0.343807	0.218813	0.140355	0.203619	0.116748	0.0530895	0.0568923	0.0563502	0.201986	0.323527	0.30452
0	0.133585	0.0308517	0.0264034	0.191382	0.301843	0.0956869	0.120563	0.184797	0.0861103	0.0406279	0.145875	0.122921	0.346297	0.318631	0.178022	0.183134	0.345714	0.0701585	0.49693	0.25105	0.235702	0.185695	0.0588925	0.0790173	0.143322	0.25421	0.375585	0.327014	0.171699	0.198134	0.392416	0.451102	0.142206	0.194648	0.0300002	0.0824669	0.481578	0.481588	0.425397	0.285308	0.123562	0.212816	0.0632422	0.0275887	0.040357	0.0555828	0.240738	0.416455	0.220172
0	0.168754	0.0422827	0.065273	0.440838	0.507907	0.133013	0.279275	0.234184	0.0967558	0.101527	0.259204	0.193284	0.400111	0.557177	0.433404	0.296463	0.502888	0.184043	0.614237	0.515831	0.437329	0.311943	0.230188	0.290326	0.21141	0.513204	0.437621	0.595576	0.326283	0.402463	0.401325	0.478528	0.4219	0.258601	0.155171	0.204758	0.676825	0.873743	0.893966	0.638761	0.21419	0.322923	0.10909	0.0761985	0.0713685	0.154593	0.476366	0.646817	0.298194
0	0.148135	0.090611	0.044067	0.763427	0.451523	0.338733	0.49885	0.556149	0.342685	0.0832103	0.697392	0.367788	0.699221	0.524227	0.812869	0.61135	0.272102	0.795896	0.250256	0.604696	0.67365	0.554157	0.221275	0.274636	0.648843	0.684372	0.440418	0.607701	0.551109	0.560706	0.372515	0.480453	0.611603	0.572108	0.328814	0.391857	0.1747	0.126745	0.23711	0.416945	0.855687	0.591099	0.565712	0.103842	0.366172	0.66978	0.697001	0.529113	0.564056
0	0.155158	0.0255461	0.0329426	0.263198	0.181242	0.107232	0.122123	0.166523	0.0433077	0.0669372	0.11381	0.125504	0.392884	0.264931	0.207341	0.192713	0.299411	0.093103	0.410754	0.302936	0.236435	0.142642	0.126206	0.0910034	0.196818	0.371347	0.348543	0.392021	0.173112	0.239697	0.381567	0.40149	0.215436	0.13287	0.0547986	0.111026	0.34311	0.490679	0.359436	0.186926	0.122112	0.22679	0.0884431	0.05189	0.0648769	0.0429769	0.198965	0.27495	0.417367
0	0.109874	0.00196195	0.00405725	0.125641	0.0680628	0.00159593	0.106847	0.00719404	0.0136083	0.00069639	0.0279808	0.295786	0.0325602	0.00078308	0.0724098	0.10503	0.00835939	0.48877	0.00424071	0.0262037	0.0330513	0.597463	0.15105	0.000353684	0.116361	0.0140153	0.0362065	0.0423962	0.00258271	0.00774601	0.00971948	0.0149543	0.0347156	0.00753494	0.0177702	0.391055	0.0352578	0.0021678	0.0671265	0.203884	0.00430671	0.0189587	5.97683e-05	0.00705356	0.154634	0.00988435	1.40803e-05	0.109053	0.0050872
0	0.179286	0.101239	0.0390944	0.413973	0.552234	0.222405	0.485613	0.432087	0.150087	0.0562486	0.728249	0.362934	0.471377	0.516078	0.747352	0.496745	0.349515	0.750415	0.424872	0.638658	0.895632	0.50089	0.13941	0.238726	0.383576	0.466905	0.392698	0.530968	0.428315	0.61823	0.432536	0.530262	0.26163	0.902489	0.192434	0.272893	0.23815	0.139646	0.335797	0.666184	0.70643	0.708647	0.342442	0.176749	0.268975	0.562516	0.920141	0.690368	0.305506
0	0.151376	0.0832875	0.0287927	0.537209	0.38525	0.142928	0.45214	0.198472	0.0262809	0.054208	0.359094	0.205804	0.35608	0.345465	0.318762	0.292667	0.19607	0.421346	0.144048	0.347437	0.391576	0.332777	0.183108	0.39546	0.23328	0.3226	0.3786	0.448129	0.443551	0.464409	0.315862	0.319679	0.21896	0.26963	0.141853	0.224346	0.101113	0.0789594	0.169682	0.313706	0.396127	0.370339	0.139314	0.36308	0.172223	0.184684	0.555368	0.236678	0.303768
0	0.0939337	0.0363671	0.0285476	0.244725	0.296547	0.065872	0.146296	0.234384	0.0648136	0.0394697	0.119839	0.183289	0.333512	0.377442	0.253342	0.202321	0.384558	0.126307	0.580441	0.370552	0.389239	0.253505	0.0919451	0.110593	0.171522	0.22545	0.440559	0.513595	0.181739	0.297873	0.554451	0.620609	0.15222	0.221146	0.0295462	0.105199	0.56357	0.459438	0.478738	0.394636	0.155469	0.320053	0.0562458	0.0235158	0.0436678	0.0767086	0.25596	0.424825	0.146669
0	0.11594	0.0750744	0.0512615	0.539145	0.419918	0.250626	0.452078	0.316077	0.0753664	0.0952039	0.776527	0.323631	0.431967	0.434358	0.531835	0.39553	0.311074	0.355319	0.12453	0.478407	0.501082	0.463899	0.22243	0.34334	0.343594	0.547556	0.273761	0.486171	0.310469	0.509328	0.296637	0.571586	0.579974	0.398538	0.330119	0.370519	0.252105	0.14905	0.28669	0.466586	0.75317	0.554782	0.397216	0.211338	0.273884	0.437371	0.550074	0.499877	0.445558
0	0.251635	0.11652	0.0673369	0.451657	0.730695	0.269648	0.575703	0.458326	0.1721	0.11372	0.765499	0.341507	0.616958	0.483017	0.680868	0.516789	0.430709	0.386004	0.253956	0.524871	0.640836	0.478242	0.187671	0.249317	0.445892	0.709273	0.457177	0.524859	0.489912	0.424215	0.439844	0.498252	0.560799	0.618862	0.316825	0.388841	0.277122	0.249935	0.476793	0.66477	0.533904	0.527602	0.264165	0.22884	0.225138	0.381762	0.643206	0.713034	0.59025
0	0.303296	0.0883313	0.0806819	0.54971	0.453211	0.44915	0.413987	0.613284	0.436679	0.12297	0.61983	0.487473	0.841749	0.474399	0.719383	0.69295	0.370844	0.782902	0.334165	0.622151	0.908818	0.622605	0.268107	0.272116	0.738656	0.648768	0.551656	0.504023	0.406652	0.386078	0.372191	0.521147	0.458022	0.908602	0.196181	0.314564	0.300084	0.169236	0.375201	0.560193	0.621232	0.611366	0.306555	0.18729	0.268823	0.401751	0.392015	0.705609	0.444608
0	0.156735	0.0272799	0.0281704	0.235011	0.174002	0.0936555	0.112711	0.166951	0.0344601	0.054974	0.129921	0.12273	0.359512	0.263303	0.20522	0.160451	0.283411	0.0920055	0.384158	0.272875	0.232181	0.139521	0.111692	0.0851202	0.203407	0.339957	0.318867	0.385744	0.170206	0.224909	0.374499	0.363263	0.176898	0.13629	0.0479634	0.100648	0.329391	0.446055	0.348859	0.198899	0.121774	0.218661	0.0937248	0.0494235	0.062639	0.0440888	0.205254	0.285461	0.385184
0	0.151696	0.0390497	0.0240573	0.27655	0.307552	0.107907	0.196312	0.179379	0.047694	0.0353652	0.257104	0.165333	0.254416	0.243205	0.32698	0.19848	0.367756	0.162346	0.430759	0.282463	0.315196	0.28244	0.0917751	0.162504	0.188557	0.330653	0.253472	0.319982	0.23453	0.264164	0.336917	0.435183	0.152967	0.240798	0.0756093	0.129081	0.835235	0.677129	0.751157	0.433098	0.240703	0.27369	0.156632	0.100069	0.0872705	0.114261	0.261786	0.527803	0.448829
0	0.107414	0.00182782	0.00392867	0.125094	0.0693304	0.00144615	0.109033	0.00664828	0.0123923	0.000666935	0.0262196	0.296314	0.0314368	0.000722765	0.0720029	0.103982	0.00762766	0.474448	0.00398151	0.0252946	0.0311692	0.601725	0.143117	0.000368513	0.109025	0.0135885	0.0370481	0.0416379	0.00267961	0.00746189	0.00944245	0.0146985	0.0335594	0.0073839	0.016347	0.379618	0.0334268	0.00196434	0.0633623	0.202463	0.00410463	0.0178295	5.41587e-05	0.00681369	0.154796	0.00956422	1.27588e-05	0.111028	0.00514775
0	0.143802	0.0529647	0.0186024	0.400555	0.424436	0.0890681	0.213466	0.290182	0.0490836	0.0334345	0.187987	0.228348	0.382059	0.306688	0.283147	0.291052	0.405478	0.175428	0.608321	0.407848	0.393296	0.32587	0.102971	0.208258	0.246217	0.327133	0.515238	0.462619	0.374949	0.274349	0.448783	0.452824	0.210991	0.245174	0.0824068	0.124376	0.705542	0.610536	0.72637	0.43018	0.24302	0.293418	0.0946091	0.0383753	0.0793089	0.126754	0.359439	0.538175	0.26167
0	0.228461	0.0272928	0.0356101	0.256874	0.161329	0.0887274	0.080089	0.207477	0.263349	0.0601422	0.101839	0.127429	0.361034	0.26454	0.20191	0.202185	0.33345	0.106019	0.449801	0.372102	0.293475	0.180216	0.0879528	0.056308	0.195507	0.308988	0.210548	0.410886	0.108441	0.241547	0.365082	0.428497	0.154431	0.187799	0.0417061	0.0825652	0.535456	0.534536	0.410807	0.189069	0.121042	0.252921	0.100314	0.0369502	0.0341268	0.0700938	0.17097	0.507513	0.209077
0	0.0761721	0.00132901	0.00182444	0.0412622	0.0793612	0.00139698	0.356387	0.00188824	0.0111987	0.000521934	0.0438988	0.340834	0.00289529	0.000952845	0.0649047	0.0978218	0.0048541	0.181536	0.000466847	0.0051235	0.0287875	0.687721	0.0666366	0.00233412	0.0360605	0.0181812	0.0194217	0.00809504	0.00302436	0.00147069	0.0016442	0.0031861	0.00440925	0.00905176	0.015917	0.214933	0.0468417	0.000554848	0.0479933	0.339427	0.00664636	0.0154865	0.000891247	0.00917777	0.290961	0.0251291	0.000267085	0.180776	0.0103485
0	0.058624	0.0232571	0.0282165	0.267894	0.221072	0.199822	0.175313	0.203818	0.177696	0.0518643	0.335192	0.135523	0.273695	0.2659	0.356365	0.259981	0.155758	0.333234	0.139241	0.31663	0.246344	0.136371	0.156776	0.16463	0.290004	0.312987	0.161913	0.3525	0.279524	0.243387	0.205767	0.409311	0.353184	0.245579	0.170292	0.211386	0.0772415	0.0668345	0.125821	0.300469	0.421178	0.226468	0.177513	0.273353	0.135229	0.267995	0.218749	0.330006	0.246699
0	0.290109	0.19076	0.0493148	0.933083	0.586488	0.283514	0.67915	0.529307	0.180469	0.079984	0.717808	0.460209	0.770155	0.486561	0.663735	0.662844	0.42715	0.592374	0.232235	0.687788	0.699092	0.813188	0.322899	0.637638	0.531171	0.712557	0.536042	0.699162	0.726777	0.651594	0.523724	0.628439	0.551871	0.514812	0.326892	0.42851	0.365639	0.282043	0.524303	0.656234	0.59906	0.608634	0.212665	0.137176	0.319588	0.387546	0.656593	0.646758	0.540867
0	0.190311	0.0567931	0.0306014	0.425074	0.491767	0.12787	0.263873	0.239447	0.0741859	0.0594795	0.259324	0.198523	0.33129	0.279127	0.329384	0.212558	0.431573	0.167156	0.392102	0.315541	0.33714	0.364716	0.124122	0.204674	0.18686	0.411202	0.401565	0.390597	0.323382	0.236491	0.440111	0.5025	0.340056	0.24011	0.116987	0.203361	0.724785	0.684236	0.807369	0.499311	0.211098	0.259494	0.0905852	0.0689321	0.0765903	0.114567	0.335981	0.520568	0.379337
0	0.0840461	0.018909	0.0264396	0.206935	0.17063	0.304817	0.180829	0.212249	0.215523	0.0503725	0.400074	0.144714	0.27281	0.254952	0.330408	0.244448	0.141803	0.275106	0.105368	0.209125	0.281753	0.18172	0.114394	0.123292	0.266675	0.324504	0.132878	0.270019	0.145315	0.172206	0.158522	0.299659	0.235205	0.269391	0.140051	0.188615	0.114135	0.0685539	0.139753	0.215359	0.34812	0.258583	0.197799	0.231818	0.157221	0.23876	0.171649	0.319519	0.261928
0	0.224342	0.119056	0.0729269	0.724023	0.779016	0.294444	0.638453	0.699473	0.232779	0.132884	0.722067	0.394967	0.787002	0.552101	0.834186	0.658045	0.504502	0.575339	0.337284	0.682913	0.79725	0.555876	0.277143	0.378174	0.627073	0.786542	0.736592	0.768059	0.707571	0.545653	0.639057	0.640555	0.737937	0.710588	0.328856	0.414398	0.226262	0.255699	0.497227	0.802626	0.624223	0.671949	0.203537	0.254043	0.172631	0.4431	0.786991	0.864816	0.497321
0	0.161454	0.0262771	0.0376425	0.276109	0.218357	0.10607	0.155009	0.157778	0.0395079	0.0808045	0.160794	0.124128	0.345414	0.250427	0.335449	0.190971	0.277565	0.158767	0.459167	0.314758	0.271348	0.151393	0.139808	0.0998186	0.217511	0.365472	0.300374	0.396432	0.189774	0.238695	0.360234	0.397799	0.246876	0.172294	0.0687013	0.138968	0.309538	0.413288	0.371149	0.231462	0.161225	0.219321	0.103563	0.0715054	0.0799633	0.0613851	0.21568	0.289688	0.422264
0	0.207396	0.0349197	0.0369427	0.249589	0.202401	0.122397	0.161918	0.15984	0.107346	0.0605355	0.198181	0.127192	0.230167	0.200365	0.21301	0.222617	0.280027	0.131368	0.293888	0.285854	0.260464	0.218819	0.0916905	0.0820786	0.174036	0.314143	0.18582	0.432438	0.138556	0.211417	0.252912	0.423579	0.159753	0.236313	0.054668	0.103922	0.528241	0.464376	0.458843	0.23392	0.19448	0.22201	0.166134	0.075606	0.062683	0.0843545	0.172023	0.415842	0.337172
0	0.260935	0.196525	0.0728073	0.858934	0.929305	0.218627	0.600869	0.56052	0.130519	0.156543	0.597474	0.435151	0.84157	0.58331	0.861416	0.527749	0.618063	0.531792	0.440237	0.836503	0.83806	0.512238	0.32409	0.588065	0.566306	0.815849	0.983758	0.847591	0.576747	0.760333	0.806367	0.786907	0.827177	0.512171	0.340832	0.432375	0.350373	0.39111	0.680821	0.791711	0.577771	0.67264	0.165779	0.25559	0.211564	0.330483	0.828374	0.69387	0.439939
0	0.0797875	0.0175885	0.0251796	0.0847877	0.158634	0.0643376	0.0820058	0.16073	0.096762	0.0376936	0.0615687	0.0992991	0.329747	0.323166	0.114719	0.158332	0.255392	0.0461953	0.520409	0.167191	0.138373	0.115732	0.0485242	0.0480493	0.131421	0.177592	0.342254	0.248955	0.0988598	0.113967	0.386811	0.376474	0.105602	0.154715	0.0130625	0.0572009	0.283652	0.288842	0.263623	0.254681	0.0841552	0.101406	0.0540437	0.0262079	0.0336786	0.0281904	0.171709	0.296662	0.154356
0	0.165324	0.0433385	0.0528292	0.27434	0.374882	0.0967792	0.203481	0.281007	0.0879336	0.0703193	0.15629	0.224726	0.469887	0.645625	0.356186	0.232162	0.566823	0.143625	0.45378	0.43331	0.477019	0.302638	0.13855	0.14223	0.2233	0.33434	0.525112	0.590069	0.212355	0.359256	0.869046	0.818469	0.191444	0.336035	0.0432826	0.122148	0.759432	0.725767	0.73567	0.598701	0.176828	0.396928	0.0652131	0.0337355	0.0422518	0.09785	0.438283	0.781377	0.245645
0	0.183263	0.0349508	0.0208887	0.168678	0.31314	0.0942908	0.124449	0.209758	0.0276361	0.0386525	0.126421	0.109563	0.268997	0.21789	0.272096	0.125281	0.292859	0.105232	0.403458	0.214602	0.231916	0.171164	0.0853869	0.0772629	0.161443	0.341288	0.240786	0.286664	0.144319	0.161404	0.435301	0.335372	0.153118	0.180215	0.0400529	0.102749	0.399499	0.542664	0.454225	0.277739	0.112484	0.192164	0.0682594	0.0656393	0.0474499	0.0530464	0.191268	0.353718	0.357196
0	0.269962	0.122424	0.0749612	0.608911	0.879315	0.293824	0.578426	0.547535	0.216571	0.127645	0.665538	0.336686	0.744636	0.517393	0.793275	0.530873	0.510212	0.413352	0.305105	0.602407	0.652905	0.443236	0.22487	0.267412	0.569177	0.869286	0.590755	0.646834	0.605611	0.471407	0.558333	0.595397	0.582552	0.69201	0.297699	0.33996	0.214527	0.264152	0.452503	0.617464	0.50203	0.524412	0.225739	0.193799	0.164086	0.395335	0.641534	0.817393	0.699396
0	0.185521	0.115762	0.0770552	0.601017	0.324171	0.27596	0.538024	0.333921	0.202213	0.155464	0.814271	0.351764	0.546421	0.688528	0.540559	0.643714	0.260544	0.4435	0.112477	0.373296	0.437883	0.437756	0.345101	0.426507	0.422193	0.782909	0.257782	0.353926	0.329276	0.402571	0.324132	0.398323	0.917555	0.413848	0.143002	0.25098	0.160027	0.147151	0.294488	0.520995	0.853321	0.458923	0.459927	0.126619	0.457055	0.660879	0.756513	0.439	0.810818
0	0.208884	0.0539661	0.0267262	0.193739	0.303588	0.103071	0.175558	0.223653	0.0575716	0.0442454	0.194994	0.138841	0.29942	0.246824	0.313907	0.193317	0.361457	0.121919	0.405834	0.263879	0.253795	0.217155	0.0874598	0.115109	0.205219	0.354117	0.302392	0.366094	0.211343	0.226174	0.386415	0.407299	0.167403	0.229063	0.0536934	0.118226	0.479327	0.528598	0.588869	0.364177	0.167578	0.232376	0.0997479	0.0375858	0.0653387	0.081191	0.293102	0.459809	0.390814
0	0.118352	0.0774647	0.051804	0.54223	0.422761	0.247628	0.447764	0.327357	0.0755275	0.096244	0.772647	0.331265	0.438818	0.428239	0.537195	0.408222	0.310741	0.36936	0.127651	0.480765	0.502396	0.475133	0.223991	0.345673	0.352055	0.556232	0.280113	0.48366	0.314342	0.507432	0.295969	0.571931	0.59434	0.403176	0.333759	0.379404	0.250836	0.148383	0.286317	0.465792	0.745322	0.551709	0.386961	0.213212	0.279231	0.440038	0.542003	0.505856	0.439696
0	0.168182	0.0235168	0.0335901	0.297575	0.254089	0.14157	0.113965	0.368241	0.464282	0.0549974	0.174217	0.151491	0.376007	0.27313	0.425719	0.161125	0.443834	0.236624	0.806771	0.367329	0.328949	0.223774	0.16951	0.142315	0.241865	0.503396	0.264245	0.603467	0.158825	0.292411	0.516108	0.672638	0.2354	0.272196	0.0586686	0.110485	0.555204	0.730307	0.585722	0.222872	0.152656	0.312827	0.0861549	0.0890676	0.0693886	0.141645	0.231213	0.588871	0.427012
0	0.156058	0.0718171	0.0268448	0.53025	0.368535	0.149967	0.472901	0.174548	0.0273367	0.0506148	0.383249	0.186023	0.32272	0.324683	0.3171	0.24548	0.172307	0.420193	0.134766	0.330882	0.38756	0.33051	0.182443	0.349329	0.2219	0.319575	0.328547	0.412023	0.40176	0.424135	0.268342	0.295734	0.195783	0.2952	0.138225	0.220648	0.108958	0.0820888	0.15622	0.245335	0.399169	0.351905	0.149505	0.361666	0.176333	0.18789	0.495215	0.226399	0.335179
0	0.302357	0.200589	0.0501212	0.803544	0.731161	0.312865	0.64666	0.494677	0.170482	0.0812658	0.703161	0.370753	0.673507	0.441816	0.701945	0.593339	0.372917	0.495795	0.195226	0.594819	0.592007	0.740498	0.287239	0.501563	0.513117	0.696673	0.564014	0.634903	0.592457	0.525109	0.466495	0.543727	0.501358	0.467745	0.318678	0.396293	0.338125	0.289165	0.47011	0.521561	0.562028	0.510583	0.263786	0.135589	0.297955	0.408937	0.584566	0.595037	0.643994
0	0.343035	0.150103	0.0625073	0.685853	0.810525	0.326056	0.627952	0.49014	0.150323	0.106752	0.687697	0.331546	0.660164	0.457707	0.75597	0.570175	0.423608	0.368585	0.204416	0.547889	0.576278	0.639919	0.246905	0.423257	0.539861	0.744254	0.543383	0.616119	0.522883	0.514458	0.516465	0.547165	0.513277	0.427653	0.306092	0.368874	0.345542	0.344924	0.523039	0.518848	0.567209	0.512306	0.299229	0.13028	0.266604	0.4181	0.62604	0.614112	0.798895
0	0.105385	0.0314231	0.0388589	0.231182	0.292585	0.0714005	0.145927	0.249196	0.0672676	0.0536889	0.138359	0.196793	0.397024	0.476255	0.286972	0.213958	0.477671	0.125401	0.698574	0.385966	0.418044	0.267798	0.0989895	0.109598	0.178837	0.26265	0.447434	0.509098	0.163044	0.32259	0.642755	0.731043	0.160965	0.226302	0.0310257	0.10305	0.689661	0.595135	0.600981	0.419752	0.142971	0.381908	0.050611	0.0318472	0.0391722	0.0703755	0.243561	0.534674	0.161851
0	0.211482	0.129605	0.0850298	0.694187	0.563545	0.215924	0.465501	0.496543	0.0955116	0.0911929	0.701737	0.444604	0.589078	0.345326	0.665377	0.563372	0.333048	0.593612	0.182489	0.512199	0.539906	0.659333	0.285963	0.487364	0.532739	0.740015	0.490556	0.554284	0.525298	0.488617	0.353457	0.578414	0.785671	0.451625	0.366467	0.527282	0.22998	0.156739	0.325225	0.488435	0.614226	0.479745	0.219519	0.280099	0.33102	0.443059	0.396231	0.554313	0.403969
0	0.172266	0.027806	0.0356141	0.297468	0.31004	0.129099	0.279077	0.177809	0.121475	0.0672239	0.236325	0.15171	0.318858	0.249512	0.26829	0.229028	0.354059	0.117954	0.291258	0.276897	0.258774	0.271765	0.129863	0.146309	0.194346	0.394204	0.317665	0.435643	0.203865	0.210941	0.311552	0.372988	0.270937	0.249767	0.0764685	0.160464	0.506996	0.531267	0.578035	0.314137	0.223152	0.224366	0.123657	0.0575273	0.0854299	0.0857028	0.28579	0.43175	0.347023
0	0.120631	0.0352497	0.0387332	0.214805	0.278454	0.101905	0.191083	0.235082	0.0971966	0.06617	0.196707	0.203579	0.418119	0.473783	0.263086	0.247729	0.434202	0.10196	0.556436	0.356654	0.34003	0.237384	0.103102	0.119444	0.203643	0.309092	0.39512	0.423427	0.176573	0.274755	0.43796	0.510814	0.227704	0.234895	0.0540591	0.116354	0.555517	0.554578	0.593346	0.358451	0.187001	0.289659	0.100891	0.0635904	0.0598943	0.0841347	0.307983	0.578991	0.230655
0	0.268691	0.239521	0.039532	0.917047	0.681456	0.292067	0.669677	0.493946	0.176927	0.0601256	0.722066	0.405576	0.681847	0.4551	0.658727	0.602444	0.344196	0.617127	0.198189	0.646756	0.637787	0.806325	0.32177	0.552514	0.487494	0.662621	0.609807	0.668101	0.633568	0.570335	0.457527	0.563477	0.503273	0.499158	0.330618	0.417252	0.322778	0.243459	0.432848	0.546799	0.566931	0.547235	0.229543	0.145859	0.315258	0.394903	0.595046	0.570955	0.513328
0	0.171621	0.100284	0.0437464	0.320208	0.524191	0.241546	0.515645	0.416202	0.119413	0.0613176	0.834065	0.3966	0.448996	0.509179	0.732139	0.555936	0.375547	0.654659	0.429466	0.615177	0.921304	0.514315	0.118802	0.206551	0.360641	0.472227	0.369852	0.484078	0.405321	0.625705	0.426027	0.558628	0.294603	0.93882	0.208237	0.299469	0.289196	0.158553	0.390567	0.773957	0.780326	0.753551	0.39737	0.189561	0.311455	0.600874	0.935184	0.771501	0.344047
0	0.120071	0.0193444	0.0491613	0.17987	0.197184	0.144945	0.127947	0.201907	0.268844	0.0764057	0.158021	0.147676	0.350194	0.446401	0.305919	0.167325	0.405531	0.10602	0.597766	0.363285	0.347067	0.224222	0.124742	0.0747158	0.179005	0.315528	0.20297	0.420394	0.103523	0.27845	0.508804	0.643821	0.225176	0.276586	0.0576741	0.110379	0.594013	0.564204	0.582903	0.390962	0.158796	0.289693	0.135356	0.088623	0.0393967	0.087304	0.296871	0.648723	0.372283
0	0.308839	0.0813879	0.0797823	0.938528	0.491025	0.238671	0.706692	0.616533	0.17113	0.151971	0.668584	0.585918	0.974804	0.598098	0.756591	0.751664	0.665528	0.582847	0.391137	0.837394	0.899624	0.765257	0.337785	0.763095	0.648465	0.821443	0.513861	0.80449	0.945895	0.887861	0.749204	0.822019	0.736386	0.568149	0.314274	0.463856	0.471699	0.392143	0.775595	0.976341	0.668772	0.779913	0.164165	0.185706	0.301611	0.369188	0.842452	0.847912	0.530649
0	0.279562	0.109485	0.0671078	0.575468	0.63129	0.241362	0.547755	0.430165	0.119126	0.108421	0.731167	0.338622	0.715892	0.675595	0.817812	0.589878	0.421502	0.521656	0.407096	0.618728	0.709871	0.531161	0.247332	0.414778	0.532115	0.710329	0.467915	0.655764	0.459431	0.541598	0.544507	0.608552	0.45224	0.580314	0.258233	0.33036	0.453276	0.387881	0.580976	0.626088	0.757687	0.583672	0.470045	0.322922	0.319833	0.408381	0.736903	0.679954	0.868265
0	0.0891454	0.0442242	0.0173357	0.348588	0.267796	0.179343	0.312164	0.219839	0.186709	0.0361752	0.453044	0.179517	0.285602	0.302919	0.309236	0.255585	0.171431	0.428621	0.169076	0.351586	0.376005	0.303867	0.0947327	0.164044	0.228569	0.254024	0.251284	0.356522	0.292884	0.296705	0.197329	0.238997	0.217262	0.348722	0.165223	0.206569	0.164716	0.108196	0.196232	0.318653	0.378261	0.306311	0.180351	0.187466	0.125404	0.373645	0.500196	0.372959	0.207536
0	0.25732	0.222765	0.0389786	0.867353	0.663735	0.290329	0.689529	0.522478	0.21861	0.0593586	0.756634	0.409045	0.64726	0.44701	0.711518	0.582897	0.361719	0.611591	0.202276	0.639212	0.632891	0.834882	0.324144	0.590995	0.490683	0.701331	0.559725	0.643277	0.584108	0.564579	0.459302	0.576828	0.514339	0.559048	0.356883	0.426663	0.371791	0.267671	0.458905	0.548529	0.592008	0.547252	0.263325	0.147302	0.328474	0.440381	0.6015	0.632719	0.530083
0	0.0948959	0.0335719	0.0296851	0.172579	0.238202	0.106006	0.153845	0.207484	0.0850423	0.0506504	0.127789	0.143977	0.348915	0.523314	0.207653	0.175784	0.287884	0.0944458	0.481914	0.304943	0.283659	0.178214	0.0742415	0.107866	0.194104	0.206563	0.320132	0.539898	0.1555	0.225853	0.496376	0.434117	0.18377	0.243385	0.0348344	0.087162	0.361622	0.397537	0.422417	0.304392	0.14672	0.182457	0.0800499	0.0290958	0.0548742	0.0658978	0.382602	0.355751	0.18148
0	0.198314	0.0374758	0.0220787	0.164089	0.390513	0.107321	0.138739	0.233751	0.0297307	0.0411364	0.114731	0.110887	0.258638	0.21027	0.3134	0.136333	0.320804	0.115471	0.4411	0.218524	0.247752	0.195445	0.0874791	0.0810601	0.136278	0.37176	0.234216	0.252837	0.134424	0.154691	0.494885	0.370969	0.165879	0.201312	0.0406652	0.112112	0.471406	0.644867	0.533757	0.318352	0.108857	0.199375	0.0508606	0.0746708	0.0433166	0.0569943	0.182016	0.391742	0.376986
0	0.140899	0.0342967	0.0172458	0.393694	0.272996	0.0838377	0.165415	0.252587	0.0696463	0.0326149	0.12178	0.148721	0.351779	0.285347	0.267531	0.19055	0.333619	0.221333	0.648578	0.507817	0.398268	0.240805	0.130109	0.131947	0.218302	0.327277	0.434509	0.549756	0.223233	0.282564	0.556065	0.593267	0.176916	0.222454	0.0491815	0.110654	0.357271	0.501995	0.442733	0.34057	0.145576	0.285862	0.0667706	0.060775	0.0326791	0.0979542	0.269085	0.458168	0.199848
0	0.286316	0.0676185	0.0611805	0.851041	0.426711	0.253755	0.784817	0.631407	0.265652	0.103815	0.8154	0.553673	0.781321	0.562089	0.801544	0.688242	0.5894	0.614608	0.301315	0.735922	0.832697	0.899571	0.335201	0.771696	0.59949	0.851042	0.318758	0.688238	0.757876	0.822377	0.64856	0.774502	0.629866	0.684458	0.376415	0.465276	0.538416	0.381914	0.713696	0.866022	0.727529	0.770888	0.274743	0.150766	0.352354	0.494098	0.825826	0.893245	0.618397
0	0.113271	0.0251069	0.0270894	0.262106	0.288107	0.0851024	0.137776	0.216234	0.0686725	0.0369098	0.115142	0.143793	0.337854	0.465547	0.229269	0.191859	0.394631	0.103849	0.579175	0.341065	0.328516	0.255082	0.114513	0.0963765	0.138366	0.218169	0.362315	0.555018	0.130169	0.283165	0.670598	0.674883	0.126544	0.215648	0.0209111	0.0925784	0.5902	0.634495	0.527167	0.350874	0.107175	0.307936	0.0369585	0.0180927	0.0287681	0.0578284	0.219794	0.405982	0.170345
0	0.207077	0.144091	0.0427081	0.625437	0.557091	0.188875	0.443147	0.412406	0.0809924	0.0909454	0.567202	0.325571	0.536784	0.390342	0.409353	0.564696	0.282165	0.441902	0.138153	0.422648	0.419449	0.483033	0.269133	0.608957	0.41449	0.485071	0.611996	0.593978	0.660605	0.443825	0.418056	0.455635	0.587169	0.329765	0.26375	0.40971	0.151408	0.133289	0.284527	0.515166	0.471856	0.39519	0.139372	0.145861	0.233992	0.322996	0.582265	0.383077	0.268447
0	0.185681	0.0735291	0.0399465	0.388671	0.502156	0.254199	0.477255	0.446124	0.136843	0.0584806	0.701294	0.370678	0.479936	0.521585	0.737561	0.526309	0.361776	0.616745	0.384925	0.603339	0.854909	0.493918	0.148362	0.280728	0.379687	0.47141	0.38339	0.593793	0.412862	0.547371	0.468778	0.5193	0.314975	0.820475	0.195765	0.288444	0.229192	0.141156	0.350886	0.639693	0.744964	0.668734	0.341895	0.170143	0.259708	0.509987	0.875451	0.716059	0.346845
0	0.109396	0.0288682	0.0267058	0.242494	0.200282	0.232554	0.230201	0.198008	0.203582	0.0496438	0.424805	0.14177	0.304897	0.353442	0.349436	0.242452	0.150022	0.271355	0.0830585	0.188736	0.288608	0.220283	0.127888	0.16897	0.257746	0.314629	0.148229	0.254882	0.163932	0.190505	0.188852	0.205452	0.218991	0.280045	0.146998	0.202583	0.114362	0.0791334	0.165472	0.253112	0.290498	0.292907	0.150636	0.127437	0.162621	0.216424	0.303518	0.326689	0.309497
0	0.0699791	0.0177739	0.0239523	0.213539	0.166766	0.381765	0.197798	0.21886	0.199712	0.0436317	0.428807	0.160367	0.260509	0.281029	0.356351	0.23586	0.156116	0.333234	0.149314	0.256889	0.330344	0.188392	0.110149	0.155749	0.279357	0.343317	0.13864	0.296662	0.158093	0.208893	0.178183	0.41334	0.225418	0.280826	0.158135	0.184999	0.148481	0.0917084	0.16775	0.239224	0.421641	0.297604	0.265992	0.321415	0.153772	0.28714	0.190029	0.319694	0.301025
0	0.0841998	0.040297	0.0269838	0.208359	0.248537	0.0686865	0.126143	0.222026	0.10212	0.0395458	0.111932	0.167541	0.355859	0.327292	0.197433	0.200148	0.278201	0.098925	0.401654	0.302028	0.296415	0.211323	0.0999449	0.0895362	0.179058	0.189614	0.396388	0.412059	0.161189	0.261776	0.398071	0.463898	0.153123	0.198142	0.0268691	0.097861	0.34316	0.268341	0.311184	0.331612	0.146536	0.23696	0.0674693	0.0338216	0.05091	0.0670023	0.243826	0.364337	0.180926
0	0.159392	0.0643274	0.0253804	0.48865	0.282845	0.150761	0.32468	0.140642	0.0258377	0.0456828	0.326653	0.151429	0.251196	0.318486	0.26261	0.201406	0.147992	0.557216	0.109855	0.354941	0.327474	0.321141	0.20048	0.445221	0.192075	0.257053	0.229537	0.438721	0.272611	0.382096	0.270418	0.299843	0.171118	0.204101	0.13038	0.209182	0.105842	0.0811128	0.14577	0.227379	0.321987	0.303496	0.105265	0.369784	0.168815	0.200062	0.404233	0.211057	0.291182
0	0.209106	0.0823085	0.0685735	0.506676	0.454125	0.144342	0.463678	0.369079	0.0842222	0.10497	0.778846	0.352428	0.780369	0.909777	0.868771	0.603091	0.424058	0.699155	0.619425	0.71465	0.870693	0.413248	0.255862	0.430227	0.512467	0.681861	0.438545	0.722926	0.375912	0.594345	0.596952	0.691808	0.410632	0.737438	0.218027	0.294949	0.547028	0.423679	0.63551	0.74461	0.951741	0.679228	0.625936	0.518282	0.369096	0.383902	0.877225	0.730504	0.901635
0	0.230743	0.110359	0.0570676	0.309016	0.566711	0.238206	0.569766	0.384296	0.131116	0.0959084	0.841724	0.348291	0.481601	0.432064	0.579398	0.499968	0.349435	0.370461	0.19912	0.440899	0.621387	0.525715	0.156102	0.241003	0.33123	0.546446	0.337879	0.404285	0.380759	0.370301	0.327195	0.403194	0.546149	0.533981	0.329204	0.434025	0.336369	0.231725	0.495182	0.708618	0.558232	0.524772	0.284228	0.252932	0.276935	0.368391	0.621132	0.608683	0.451604
0	0.112767	0.0280555	0.0379678	0.258652	0.306521	0.0670241	0.151838	0.240447	0.0630175	0.0486832	0.126071	0.181312	0.364253	0.420897	0.294067	0.19674	0.475247	0.136635	0.682404	0.376255	0.426387	0.289577	0.103949	0.113051	0.166129	0.266813	0.448748	0.545791	0.164493	0.324503	0.689624	0.78035	0.145749	0.227009	0.0276453	0.108818	0.732005	0.60834	0.602524	0.432151	0.135151	0.400863	0.0370115	0.0175331	0.0374744	0.0654133	0.213785	0.481641	0.164176
0	0.222282	0.0381899	0.038404	0.259447	0.200754	0.123754	0.158983	0.168362	0.120009	0.063356	0.203516	0.13383	0.238907	0.200502	0.220859	0.242843	0.284205	0.140988	0.290515	0.305237	0.269616	0.232946	0.0980324	0.0809943	0.182214	0.330966	0.179329	0.437865	0.128129	0.220033	0.236018	0.375958	0.171873	0.257291	0.0567173	0.106807	0.502053	0.424504	0.452858	0.242945	0.207288	0.230156	0.178348	0.0832138	0.0655018	0.0912392	0.174334	0.437849	0.313387
0	0.129362	0.0211355	0.0274794	0.187718	0.231001	0.112665	0.181044	0.126267	0.0317824	0.0427771	0.170379	0.0941428	0.195797	0.207721	0.190743	0.111112	0.273508	0.0791171	0.332275	0.179252	0.210901	0.144505	0.0573286	0.0941422	0.13581	0.232953	0.240764	0.391541	0.207233	0.168471	0.366452	0.676118	0.097287	0.124937	0.0438682	0.0916709	0.661809	0.690889	0.517456	0.21046	0.122456	0.180949	0.0895873	0.0282944	0.0485863	0.0476983	0.181802	0.308484	0.476556
0	0.187691	0.118594	0.0760661	0.846672	0.675753	0.290293	0.692986	0.819059	0.236874	0.129833	0.773449	0.45246	0.811955	0.567817	0.861401	0.758892	0.485917	0.728415	0.352083	0.740587	0.910873	0.672083	0.333556	0.511467	0.677895	0.707916	0.866502	0.880257	0.809249	0.612975	0.697853	0.677333	0.881515	0.696346	0.357475	0.495877	0.238066	0.24066	0.529532	0.952912	0.740853	0.790048	0.185923	0.319751	0.190374	0.481648	0.884833	0.869009	0.30557
0	0.225287	0.128264	0.0716411	0.545624	0.77658	0.191961	0.536341	0.677788	0.329581	0.0985654	0.615491	0.561621	0.663875	0.338784	0.768203	0.758496	0.458372	0.691796	0.281243	0.587546	0.881117	0.712897	0.235685	0.431464	0.660978	0.76725	0.774658	0.462282	0.587741	0.407752	0.417388	0.823187	0.474554	0.816731	0.256846	0.374509	0.417228	0.194982	0.468649	0.78666	0.59114	0.634496	0.186288	0.150009	0.241106	0.473997	0.320736	0.777739	0.466607
0	0.205866	0.103979	0.0395312	0.638962	0.656457	0.269785	0.887569	0.668283	0.3488	0.0582604	0.976116	0.490839	0.441741	0.493096	0.957182	0.540735	0.502855	0.681117	0.256351	0.636646	0.743051	0.869003	0.334589	0.729718	0.507375	0.901888	0.302995	0.506289	0.376471	0.656749	0.51934	0.717347	0.534241	0.845836	0.496569	0.464068	0.653179	0.380968	0.617468	0.656916	0.761397	0.701482	0.386146	0.190213	0.390425	0.588441	0.722116	0.925315	0.615315
0	0.030187	0.000258804	0.000198434	0.0268396	0.0670188	0.000154794	0.132995	0.000154011	0.000770594	1.51985e-05	0.00511149	0.18946	0.00284586	4.11338e-05	0.0379311	0.0409547	0.000250979	0.219639	0.00202795	0.00701211	0.00155276	0.408678	0.0176004	0.000894478	0.0167341	0.000481124	0.0275911	0.0127275	0.00221541	0.000555964	0.000284878	0.00275021	0.000581785	0.00214807	0.000284851	0.169168	0.0300932	0.000989335	0.0694989	0.42269	0.000153579	0.00113745	2.52336e-05	0.000206805	0.0942869	0.00621322	0.000257388	0.188588	0.000168531
0	0.242883	0.213199	0.040598	0.892488	0.630012	0.307387	0.625203	0.512803	0.221961	0.0658596	0.714467	0.395413	0.696948	0.45834	0.692635	0.609439	0.32426	0.647266	0.20317	0.636136	0.627805	0.753626	0.30129	0.507603	0.529163	0.67806	0.57599	0.652692	0.615293	0.55442	0.429135	0.539908	0.537197	0.508252	0.336058	0.415145	0.290972	0.220482	0.38719	0.50197	0.626684	0.538787	0.30763	0.130409	0.331258	0.458181	0.597135	0.55778	0.53032
0	0.0881698	0.000787125	0.00415943	0.0600628	0.0781348	0.0040316	0.140476	0.00184293	0.00327802	0.000369174	0.0205493	0.437397	0.0210881	0.00174658	0.0709093	0.0952255	0.00645083	0.343228	0.00332884	0.0249458	0.0239805	0.674774	0.113115	0.00366977	0.0538025	0.0115049	0.047246	0.039653	0.00411658	0.0151992	0.00779632	0.0188573	0.0124358	0.00943075	0.00519144	0.228544	0.0525341	0.00151016	0.0799518	0.373278	0.00337851	0.0167406	0.000211045	0.00585104	0.176028	0.010726	0.000116104	0.191421	0.0052235
0	0.159912	0.0365975	0.0314062	0.323677	0.3497	0.120421	0.270523	0.186122	0.0884648	0.0533831	0.261811	0.178316	0.304721	0.2609	0.308024	0.21967	0.384025	0.143883	0.369664	0.291814	0.328401	0.325533	0.109396	0.158546	0.183391	0.373087	0.317844	0.374355	0.238293	0.23422	0.344113	0.416987	0.216523	0.269648	0.0779668	0.149083	0.750225	0.61372	0.700647	0.405946	0.221207	0.270517	0.121442	0.054346	0.080952	0.107331	0.285232	0.551315	0.388505
0	0.218744	0.14263	0.0442574	0.718928	0.518919	0.180614	0.405827	0.420701	0.100425	0.100545	0.562371	0.313766	0.517684	0.34088	0.423374	0.507654	0.270154	0.462981	0.124225	0.428127	0.382065	0.501492	0.321625	0.673402	0.430168	0.544858	0.601716	0.590084	0.652155	0.396003	0.382619	0.488932	0.701039	0.298619	0.306777	0.449876	0.158961	0.141627	0.282939	0.436113	0.447084	0.323979	0.0951329	0.121541	0.223936	0.353731	0.418397	0.411351	0.243076
0	0.197227	0.062195	0.0405365	0.442035	0.501696	0.26279	0.471812	0.476263	0.151388	0.0635013	0.638732	0.357176	0.514233	0.526174	0.7332	0.518693	0.358274	0.579696	0.343056	0.591034	0.801764	0.491685	0.174355	0.331062	0.399768	0.486026	0.408918	0.657695	0.431795	0.490266	0.493729	0.493453	0.371102	0.723453	0.206834	0.30308	0.202644	0.142719	0.347687	0.58137	0.710502	0.614398	0.298481	0.172733	0.227618	0.443581	0.824724	0.682674	0.355168
0	0.160107	0.0716888	0.0267522	0.509959	0.385667	0.1587	0.488607	0.180422	0.0287516	0.0498983	0.415241	0.188705	0.326379	0.330678	0.325733	0.25852	0.172102	0.415546	0.133796	0.328882	0.396102	0.335711	0.177126	0.32938	0.230488	0.321972	0.325847	0.409064	0.403652	0.411018	0.263717	0.292565	0.196008	0.319898	0.139464	0.22819	0.115443	0.087153	0.161278	0.250992	0.412806	0.358774	0.163923	0.344506	0.185151	0.195138	0.504975	0.230998	0.352682
0	0.0859913	0.000465134	0.00395408	0.0462885	0.053202	0.0027788	0.112295	0.000507365	0.000668816	0.000459462	0.0159282	0.287469	0.0143545	0.00129235	0.0559407	0.0726954	0.00405715	0.238652	0.00230964	0.0112326	0.0118464	0.41214	0.109681	0.00209493	0.0407857	0.0114676	0.0316356	0.02442	0.00267921	0.00802769	0.00414549	0.0139603	0.00645276	0.00632319	0.00370686	0.193272	0.0393013	0.000887029	0.0504649	0.244307	0.00277203	0.0136387	0.000147964	0.00859554	0.261049	0.0057804	8.2932e-05	0.137824	0.00892623
0	0.242733	0.148027	0.0641681	0.778972	0.565059	0.201134	0.458406	0.440633	0.109322	0.0929755	0.603645	0.347539	0.557238	0.345133	0.484041	0.510444	0.29623	0.494227	0.133127	0.447561	0.424956	0.55666	0.339693	0.693936	0.473654	0.608591	0.631095	0.630398	0.684106	0.427582	0.399203	0.507459	0.715456	0.323499	0.313958	0.473382	0.180583	0.154561	0.313031	0.454804	0.492124	0.358232	0.126881	0.167537	0.240082	0.368783	0.397873	0.424902	0.303325
0	0.341097	0.163902	0.0595321	0.738603	0.838746	0.306524	0.616555	0.487694	0.13809	0.103395	0.6912	0.334285	0.673036	0.490729	0.747848	0.550798	0.446436	0.380511	0.222722	0.58391	0.623882	0.596637	0.25217	0.44988	0.523548	0.768339	0.630452	0.664995	0.465534	0.561924	0.577738	0.590436	0.555958	0.423311	0.318666	0.368314	0.318071	0.34495	0.529511	0.538748	0.572606	0.559561	0.276362	0.131134	0.2495	0.391454	0.693731	0.587837	0.767844
0	0.148646	0.0291313	0.0577711	0.224961	0.263344	0.128906	0.153763	0.218955	0.291981	0.0747674	0.156843	0.191637	0.42163	0.650733	0.355988	0.207952	0.531482	0.131572	0.611324	0.470667	0.43974	0.240844	0.168424	0.11197	0.204365	0.335393	0.343961	0.567779	0.143783	0.344334	0.771647	0.862992	0.202869	0.291928	0.0432117	0.105714	0.66185	0.68605	0.639588	0.495364	0.175842	0.331691	0.102506	0.0590536	0.0360148	0.0986147	0.378974	0.822277	0.289518
0	0.0773878	0.0436657	0.0205452	0.230967	0.287008	0.065271	0.141108	0.229733	0.0666624	0.0319267	0.115346	0.185897	0.309518	0.344494	0.217911	0.208254	0.30719	0.116596	0.49434	0.36623	0.356629	0.221135	0.0814234	0.108191	0.176885	0.189746	0.43314	0.483663	0.196178	0.274898	0.436026	0.480745	0.158711	0.216058	0.0313725	0.10165	0.416639	0.331861	0.372937	0.361499	0.173196	0.249552	0.0735689	0.0296097	0.049023	0.0866394	0.293966	0.379844	0.131628
0	0.145468	0.0470205	0.0264371	0.356009	0.395581	0.107261	0.252929	0.203019	0.0476163	0.0394107	0.279613	0.208511	0.295932	0.275376	0.357013	0.216298	0.410548	0.178371	0.481791	0.318697	0.405781	0.373691	0.0893509	0.174233	0.181446	0.344826	0.333515	0.319557	0.287451	0.261551	0.384812	0.462835	0.164139	0.285927	0.0807829	0.13648	0.975678	0.682419	0.81594	0.498331	0.222095	0.316844	0.116889	0.0513919	0.0775046	0.130856	0.29027	0.661562	0.420235
0	0.0848518	0.000413923	0.00360767	0.0652574	0.0555074	0.000910107	0.110833	0.000690999	0.000623002	0.000470496	0.0112994	0.241486	0.0143759	0.000611081	0.0547795	0.0745413	0.00197591	0.225307	0.00166752	0.00841252	0.0106011	0.415475	0.0873124	0.00125332	0.0358918	0.0109424	0.0316738	0.0204905	0.00252421	0.00415115	0.00369216	0.0121348	0.0103772	0.00488512	0.0029019	0.207489	0.0311092	0.000406336	0.0356651	0.195642	0.00244222	0.0123066	8.68219e-05	0.00808594	0.255115	0.00535971	4.83059e-05	0.125744	0.00902353
0	0.157765	0.0432701	0.023804	0.293728	0.391032	0.102233	0.160672	0.219549	0.060567	0.0388731	0.191343	0.162418	0.354668	0.287297	0.22917	0.224954	0.384685	0.107769	0.477195	0.316797	0.311354	0.251901	0.0723477	0.130603	0.177228	0.304093	0.414713	0.381999	0.262937	0.251123	0.377962	0.447927	0.175645	0.214211	0.0543129	0.105106	0.61888	0.579838	0.572762	0.325732	0.178349	0.27793	0.0792671	0.0317603	0.0602495	0.0872537	0.295197	0.479892	0.268214
0	0.101526	0.032046	0.0311382	0.166161	0.2364	0.113178	0.155029	0.202717	0.0873024	0.0535057	0.133297	0.136146	0.355893	0.542324	0.205918	0.171113	0.2895	0.0898826	0.477561	0.293422	0.270825	0.172683	0.0723231	0.106987	0.194684	0.214243	0.303082	0.539621	0.150957	0.218356	0.499678	0.427547	0.186914	0.245845	0.0357404	0.0850746	0.363022	0.418117	0.435207	0.293111	0.142004	0.175761	0.0807372	0.0292048	0.0555691	0.0624431	0.391713	0.357496	0.194633
0	0.213126	0.0343669	0.0362379	0.244188	0.191852	0.132782	0.141621	0.146593	0.0900473	0.0609279	0.185864	0.119158	0.262356	0.213712	0.208801	0.228427	0.269668	0.117031	0.274561	0.264711	0.228314	0.198909	0.117961	0.0789097	0.178831	0.351952	0.16776	0.450966	0.114442	0.225498	0.263015	0.365437	0.192288	0.206213	0.058207	0.113566	0.44482	0.430234	0.408159	0.22493	0.192418	0.21566	0.188794	0.0809316	0.0656465	0.0773649	0.192624	0.388145	0.350122
0	0.231056	0.110819	0.0601636	0.316566	0.585901	0.247481	0.578115	0.388784	0.132557	0.101352	0.861992	0.350709	0.503091	0.454268	0.580916	0.514259	0.357178	0.374135	0.209586	0.460208	0.641563	0.519635	0.157767	0.241757	0.337333	0.555447	0.346361	0.42269	0.391933	0.386925	0.337562	0.412673	0.553531	0.55316	0.336952	0.439857	0.335608	0.236177	0.502778	0.723405	0.573202	0.542614	0.29766	0.265975	0.281944	0.373198	0.656652	0.621011	0.473398
0	0.170638	0.0329863	0.0205952	0.174652	0.259286	0.0844064	0.115392	0.194076	0.0272811	0.0372432	0.134518	0.110878	0.279141	0.229469	0.244147	0.119837	0.279154	0.0991121	0.38603	0.216905	0.226985	0.158007	0.0845109	0.0757431	0.179043	0.317854	0.251808	0.318161	0.151811	0.171127	0.401882	0.324516	0.144043	0.16704	0.0392441	0.0964478	0.359979	0.47383	0.40369	0.254382	0.115707	0.193655	0.0793539	0.0578835	0.0500076	0.0506939	0.198382	0.331333	0.337481
0	0.343883	0.144059	0.0638105	0.662748	0.798164	0.334612	0.632945	0.491211	0.155681	0.108223	0.686163	0.330346	0.654525	0.443242	0.759527	0.578662	0.413609	0.363362	0.196397	0.532111	0.555427	0.658877	0.244598	0.411596	0.547006	0.733704	0.505245	0.594711	0.548003	0.493667	0.489626	0.528212	0.494582	0.429555	0.300584	0.369119	0.357574	0.344912	0.520204	0.510131	0.564846	0.491608	0.309244	0.129906	0.274096	0.429771	0.596391	0.62562	0.812496
0	0.257359	0.123182	0.0717616	0.471989	0.614502	0.359649	0.471482	0.642469	0.502049	0.106732	0.624235	0.493011	0.843336	0.462361	0.747921	0.659333	0.426641	0.592136	0.324077	0.545529	0.741127	0.634	0.226916	0.283594	0.704031	0.729999	0.642571	0.561599	0.462352	0.436668	0.442033	0.714934	0.448321	0.802818	0.190853	0.324768	0.298054	0.187978	0.391672	0.593272	0.619173	0.596977	0.250924	0.136695	0.253911	0.350151	0.371911	0.670055	0.478874
0	0.0854435	0.0396849	0.028202	0.204086	0.241582	0.0693567	0.123442	0.220802	0.108472	0.0410238	0.111517	0.164453	0.364713	0.325202	0.193965	0.198883	0.273661	0.0957071	0.386021	0.290758	0.285834	0.209541	0.103258	0.0861888	0.179567	0.189807	0.389882	0.39907	0.15483	0.259589	0.391615	0.461327	0.152275	0.194982	0.026097	0.0971383	0.330652	0.257845	0.30098	0.326382	0.141755	0.235008	0.066427	0.0347099	0.0512263	0.063495	0.234996	0.362604	0.189785
0	0.128982	0.036063	0.0177873	0.363506	0.275732	0.0802979	0.160906	0.248155	0.0690446	0.0323579	0.120373	0.15549	0.343233	0.295392	0.258061	0.193677	0.328022	0.20181	0.618808	0.481158	0.390333	0.237162	0.12098	0.12753	0.210424	0.301313	0.434216	0.537646	0.218308	0.280973	0.533287	0.571761	0.173356	0.221227	0.0458181	0.10902	0.367781	0.469308	0.428845	0.344393	0.150783	0.278763	0.0679972	0.0547974	0.0357581	0.0958499	0.273641	0.442432	0.186992
0	0.142752	0.0714868	0.0270839	0.556402	0.328614	0.128009	0.41996	0.171587	0.0392992	0.0517294	0.332619	0.18217	0.315762	0.310619	0.30275	0.223575	0.172087	0.419767	0.128969	0.325824	0.362307	0.318888	0.193902	0.392457	0.210202	0.317027	0.328562	0.405423	0.395168	0.436427	0.270007	0.306003	0.198077	0.237618	0.137837	0.207721	0.0956069	0.0696513	0.144821	0.242003	0.368168	0.338962	0.122095	0.39665	0.166861	0.18261	0.452142	0.228136	0.29943
0	0.188613	0.0703209	0.0397752	0.397057	0.5003	0.255885	0.473613	0.449256	0.139248	0.0588912	0.685129	0.366483	0.484732	0.522018	0.735055	0.521703	0.359516	0.60632	0.374799	0.598628	0.840898	0.491506	0.152842	0.290858	0.381441	0.472664	0.384434	0.606347	0.413369	0.532581	0.472267	0.511229	0.3227	0.797617	0.196774	0.289928	0.222587	0.140457	0.348114	0.621705	0.736421	0.653772	0.332914	0.16926	0.252642	0.493874	0.862336	0.705833	0.349548
0	0.186189	0.0494003	0.0587095	0.280574	0.401987	0.108623	0.223957	0.297066	0.0978348	0.0788874	0.168267	0.241894	0.511774	0.734915	0.380731	0.246215	0.603033	0.146342	0.362838	0.455896	0.496945	0.307762	0.152305	0.153783	0.245946	0.36106	0.555273	0.607663	0.231294	0.372978	0.940238	0.833414	0.209549	0.379295	0.0494782	0.127411	0.770068	0.772429	0.788392	0.664673	0.193323	0.3952	0.0764083	0.0401684	0.0441329	0.110713	0.527413	0.90023	0.277996
0	0.105967	0.0617208	0.0276271	0.412905	0.282178	0.113733	0.258422	0.234857	0.157736	0.0500351	0.43759	0.186871	0.316335	0.290279	0.325462	0.259944	0.162634	0.330966	0.0703552	0.247011	0.298094	0.296732	0.188176	0.369145	0.254396	0.331131	0.269287	0.304301	0.347499	0.305399	0.203624	0.314978	0.221399	0.198251	0.149887	0.223332	0.0939353	0.0540252	0.134747	0.290053	0.338807	0.333078	0.138067	0.362923	0.222907	0.245829	0.269902	0.311346	0.293382
0	0.140473	0.0182755	0.0455019	0.23676	0.204689	0.139956	0.107041	0.255712	0.438223	0.0628987	0.158586	0.152491	0.361498	0.43453	0.374528	0.170622	0.459974	0.173351	0.804512	0.425423	0.365651	0.208162	0.172414	0.108713	0.202572	0.39772	0.226733	0.566623	0.115907	0.308216	0.583337	0.784973	0.212154	0.244287	0.0469135	0.0991785	0.572827	0.667159	0.552787	0.299997	0.156287	0.300573	0.102625	0.0783615	0.0478832	0.11158	0.2437	0.668634	0.350482
0	0.259473	0.124379	0.074097	0.58282	0.854907	0.263369	0.562109	0.576933	0.249303	0.118635	0.647062	0.400208	0.717874	0.461892	0.783232	0.590893	0.49509	0.486371	0.295969	0.592939	0.712027	0.516716	0.224832	0.309475	0.59297	0.84399	0.636554	0.584152	0.593903	0.44776	0.511203	0.660592	0.540594	0.72809	0.283553	0.345624	0.274319	0.244027	0.454529	0.656414	0.521002	0.548062	0.215347	0.176958	0.18655	0.415839	0.536655	0.802589	0.642515
0	0.116202	0.0437793	0.0468043	0.192107	0.299214	0.0920295	0.15867	0.281518	0.0854329	0.0715086	0.172175	0.241526	0.498279	0.668562	0.301871	0.258387	0.521363	0.109348	0.623846	0.427073	0.425471	0.23674	0.106041	0.116524	0.225086	0.285	0.478097	0.467234	0.181403	0.334321	0.643182	0.664242	0.206435	0.273102	0.0435235	0.0991125	0.629465	0.625052	0.656411	0.47167	0.174193	0.347532	0.0858371	0.0629837	0.044042	0.092926	0.392535	0.755031	0.193949
0	0.199874	0.0375866	0.0213043	0.161917	0.385076	0.109071	0.137974	0.229696	0.0292414	0.0402237	0.120295	0.108533	0.251948	0.201182	0.31289	0.136596	0.314169	0.116147	0.427696	0.213471	0.238417	0.190759	0.0871772	0.0837122	0.138612	0.373234	0.222451	0.244351	0.136268	0.153384	0.475219	0.354635	0.165738	0.19961	0.0429023	0.112713	0.470669	0.647596	0.538696	0.315638	0.116152	0.191981	0.0593708	0.081197	0.0465732	0.0588374	0.183887	0.387111	0.391035
0	0.195149	0.0321938	0.0364558	0.264969	0.189346	0.118619	0.141586	0.166741	0.0845712	0.0661379	0.164255	0.1316	0.312094	0.232433	0.214987	0.221655	0.291033	0.12011	0.339862	0.307285	0.257099	0.191997	0.11334	0.0859119	0.189419	0.354119	0.255336	0.419261	0.147306	0.233455	0.305946	0.387357	0.189303	0.200218	0.055904	0.108472	0.435583	0.460987	0.41308	0.215939	0.169132	0.231762	0.139673	0.0702777	0.0667062	0.0691324	0.184354	0.365757	0.370031
0	0.165643	0.0297852	0.0283492	0.251633	0.269954	0.119219	0.212683	0.17277	0.0885195	0.0489217	0.23153	0.1399	0.274019	0.23359	0.271561	0.211538	0.343179	0.127324	0.332601	0.264599	0.23983	0.233906	0.112726	0.151637	0.197136	0.357408	0.260661	0.388392	0.198192	0.237866	0.303039	0.387329	0.211109	0.222359	0.0735287	0.14091	0.591508	0.602033	0.632302	0.337252	0.242481	0.226586	0.157668	0.0993955	0.0911301	0.0912554	0.26616	0.41076	0.40017
0	0.114377	0.0233152	0.0438496	0.234354	0.258567	0.0910603	0.13488	0.214343	0.181992	0.0556997	0.132694	0.172005	0.359367	0.470262	0.307087	0.190609	0.474838	0.13148	0.723166	0.409067	0.416455	0.257942	0.127762	0.102291	0.167539	0.281597	0.363867	0.542521	0.136305	0.323544	0.672626	0.813476	0.161681	0.22509	0.0308774	0.102476	0.683772	0.610481	0.576849	0.409388	0.143356	0.363986	0.0636712	0.0350189	0.0350183	0.0726036	0.227307	0.566976	0.205548
0	0.210149	0.0318214	0.0351962	0.26039	0.203212	0.136814	0.1503	0.152963	0.106722	0.0553986	0.225201	0.120511	0.247408	0.209364	0.224366	0.219903	0.274411	0.137506	0.311247	0.272307	0.245624	0.211297	0.0985797	0.0737783	0.180074	0.334126	0.167567	0.405065	0.122093	0.198139	0.235377	0.403549	0.170561	0.253837	0.0562173	0.110895	0.471061	0.455286	0.433769	0.210442	0.201715	0.220113	0.165271	0.0697849	0.081958	0.0845828	0.161396	0.384876	0.45872
0	0.20643	0.138402	0.0672374	0.475891	0.733251	0.192973	0.52066	0.711318	0.438218	0.087046	0.611213	0.603559	0.698953	0.330082	0.763671	0.779474	0.44798	0.683483	0.290536	0.548029	0.852662	0.7667	0.221741	0.430108	0.687038	0.741507	0.806696	0.464432	0.555732	0.422234	0.409183	0.909078	0.430429	0.819595	0.219947	0.370558	0.432188	0.177027	0.451193	0.784556	0.633928	0.656223	0.183788	0.118988	0.265084	0.442898	0.256083	0.719679	0.405439
0	0.131158	0.0494933	0.0231182	0.351474	0.320561	0.192611	0.365355	0.220995	0.169484	0.0395983	0.508257	0.207517	0.336561	0.465836	0.404869	0.325527	0.19085	0.467869	0.153056	0.316548	0.415518	0.329464	0.142959	0.287949	0.25563	0.345337	0.223159	0.281546	0.269446	0.307622	0.237787	0.274477	0.193595	0.333694	0.188151	0.227767	0.151242	0.105765	0.201256	0.305165	0.352035	0.410954	0.204781	0.213682	0.184851	0.325051	0.517854	0.314355	0.363866
0	0.238347	0.118732	0.0539534	0.74173	0.614853	0.342902	0.566311	0.532563	0.268218	0.0970663	0.69712	0.350956	0.69343	0.485278	0.794023	0.603935	0.333806	0.605485	0.217074	0.571414	0.607081	0.610182	0.236745	0.336585	0.620581	0.724489	0.475622	0.598244	0.560474	0.534415	0.419963	0.503003	0.576103	0.49159	0.325399	0.3886	0.260633	0.230792	0.365219	0.450179	0.727402	0.542059	0.463103	0.111431	0.332708	0.572432	0.638792	0.564237	0.699894
0	0.289304	0.143125	0.116801	0.819074	0.727137	0.253649	0.607122	0.461798	0.13307	0.0630964	0.692783	0.40356	0.648688	0.398218	0.727396	0.465582	0.392477	0.541546	0.196576	0.508145	0.571577	0.6162	0.326454	0.600785	0.58161	0.800088	0.638307	0.722529	0.732037	0.505776	0.47209	0.580518	0.677541	0.433748	0.31529	0.49447	0.229944	0.196939	0.4024	0.552054	0.608676	0.458133	0.237065	0.316838	0.253839	0.376573	0.416599	0.506217	0.532682
0	0.181405	0.0433759	0.0767546	0.347251	0.460692	0.126585	0.259473	0.272728	0.109175	0.108834	0.211923	0.22301	0.496553	0.778508	0.453844	0.302652	0.596484	0.168574	0.520519	0.55417	0.502682	0.283449	0.231408	0.247751	0.248212	0.490691	0.519202	0.680633	0.276764	0.44524	0.702756	0.657763	0.34739	0.350248	0.112259	0.16526	0.708204	0.900097	0.875072	0.716518	0.210407	0.373824	0.101381	0.0644625	0.0543286	0.147874	0.580468	0.859464	0.273773
0	0.201396	0.142786	0.0418571	0.588473	0.56743	0.189649	0.452509	0.405534	0.0742078	0.0869717	0.56529	0.325232	0.538125	0.406415	0.409353	0.5753	0.285423	0.433085	0.143993	0.420046	0.430174	0.469793	0.249381	0.580784	0.407708	0.466581	0.607979	0.592967	0.65985	0.455824	0.428926	0.447475	0.549048	0.338375	0.250014	0.395585	0.147809	0.130308	0.283955	0.540204	0.477912	0.413847	0.152803	0.154566	0.234556	0.310673	0.633227	0.37503	0.276954
0	0.188359	0.0973222	0.0469984	0.308713	0.54481	0.19571	0.491679	0.328711	0.0970823	0.0808868	0.69673	0.280839	0.44142	0.440029	0.571184	0.429391	0.316056	0.365336	0.201829	0.427355	0.540181	0.392323	0.146113	0.262767	0.332481	0.51634	0.338508	0.45258	0.444077	0.366873	0.363943	0.456578	0.519201	0.444442	0.300692	0.403538	0.245053	0.187408	0.399913	0.653874	0.510853	0.434888	0.233077	0.238227	0.22747	0.308689	0.636573	0.529217	0.394579
0	0.227082	0.136508	0.0446374	0.872708	0.766986	0.224383	0.797044	0.393359	0.0789148	0.0652078	0.727439	0.431475	0.648642	0.735424	0.676186	0.589655	0.431112	0.809161	0.361835	0.800124	0.927219	0.708925	0.322536	0.340255	0.458751	0.569781	0.673937	0.753073	0.735695	0.97901	0.643312	0.84033	0.422868	0.545001	0.239548	0.35727	0.354044	0.296179	0.516784	0.785629	0.748017	0.917953	0.272216	0.23934	0.282212	0.373302	0.929202	0.551672	0.552571
0	0.259156	0.110403	0.0681002	0.564492	0.811018	0.28742	0.551255	0.519386	0.201789	0.114055	0.655006	0.335673	0.693717	0.51609	0.777331	0.517025	0.479639	0.432918	0.309996	0.592891	0.670469	0.443089	0.209868	0.270542	0.529349	0.798268	0.540532	0.63823	0.560947	0.468635	0.537908	0.570509	0.525418	0.696784	0.276327	0.325768	0.211048	0.240064	0.427066	0.593545	0.533768	0.529647	0.242603	0.184109	0.17632	0.40094	0.666022	0.785598	0.647019
0	0.0812598	0.00138773	0.00295823	0.0454933	0.0900678	0.00140156	0.313242	0.00319567	0.0121598	0.000466767	0.0375843	0.421803	0.0105194	0.0010303	0.071089	0.11048	0.00607622	0.232376	0.00160362	0.0154055	0.0381693	0.808311	0.0653785	0.00390767	0.0467157	0.0168888	0.0340291	0.0164854	0.00385133	0.00710589	0.00428393	0.0103269	0.00957508	0.00968278	0.0138012	0.229942	0.0648818	0.00115199	0.0762178	0.433058	0.00622905	0.0222373	0.00076322	0.00729251	0.234379	0.025628	0.000253649	0.225611	0.00753289
0	0.335357	0.0730666	0.08174	0.917052	0.457994	0.325213	0.750702	0.675422	0.2003	0.148133	0.798608	0.622404	0.968434	0.632609	0.689517	0.853739	0.543888	0.632864	0.401216	0.870575	0.942983	0.786732	0.373397	0.594807	0.649251	0.841606	0.470981	0.740353	0.876714	0.915017	0.701071	0.847202	0.676587	0.677324	0.357166	0.452384	0.558152	0.457689	0.831078	0.930085	0.805635	0.829911	0.319371	0.273966	0.351192	0.516329	0.882005	0.874671	0.652097
0	0.180079	0.139536	0.0436016	0.380493	0.658639	0.215624	0.510863	0.441542	0.166298	0.070771	0.576649	0.367659	0.61816	0.48781	0.504657	0.633569	0.34817	0.395915	0.215975	0.426059	0.523171	0.457071	0.148237	0.383983	0.443568	0.470923	0.616292	0.592357	0.616554	0.516793	0.494422	0.524291	0.354861	0.476086	0.174646	0.318313	0.171123	0.136289	0.313167	0.671225	0.543236	0.541095	0.225781	0.176274	0.239614	0.261164	0.786838	0.41195	0.371573
0	0.106232	0.026894	0.0240392	0.215569	0.25118	0.10723	0.13995	0.198759	0.0808129	0.0396443	0.117238	0.122636	0.334447	0.530354	0.187552	0.179105	0.30404	0.0819206	0.483195	0.301889	0.25458	0.198186	0.0995511	0.0939895	0.153586	0.191245	0.291517	0.556889	0.122541	0.231985	0.583436	0.5058	0.147205	0.225997	0.024734	0.0810409	0.409179	0.539235	0.446084	0.285337	0.110642	0.198231	0.0581956	0.0236592	0.0376914	0.0563136	0.308511	0.344627	0.182978
0	0.197722	0.0377188	0.0333235	0.255648	0.269952	0.117343	0.148284	0.174949	0.0984199	0.0542685	0.197569	0.131488	0.281484	0.232301	0.212059	0.221176	0.319987	0.115793	0.344681	0.29652	0.272472	0.22537	0.0822906	0.0851422	0.166166	0.315129	0.256576	0.402407	0.159515	0.228945	0.283182	0.408597	0.166127	0.232947	0.0497365	0.101887	0.52754	0.480952	0.465806	0.253837	0.181079	0.247496	0.134007	0.061525	0.058523	0.0815992	0.209218	0.442587	0.292584
0	0.153697	0.0354522	0.0261446	0.228091	0.345083	0.1037	0.129982	0.185926	0.0734881	0.0410341	0.174279	0.126679	0.343092	0.29151	0.195588	0.187764	0.362851	0.0773975	0.448569	0.271996	0.261838	0.204723	0.0600698	0.0877687	0.144824	0.280985	0.369311	0.343017	0.19382	0.226339	0.366993	0.453179	0.152763	0.197729	0.036719	0.0912563	0.533786	0.534193	0.467884	0.278301	0.137099	0.25081	0.0682671	0.0293734	0.046122	0.0639185	0.254452	0.438789	0.251713
0	0.175012	0.0285484	0.0264962	0.198939	0.174588	0.115334	0.104455	0.131588	0.0258188	0.0464184	0.149341	0.0996176	0.306922	0.246216	0.192944	0.160425	0.249857	0.0761189	0.294206	0.197066	0.174829	0.131643	0.126513	0.0755193	0.188716	0.346556	0.202237	0.431247	0.122823	0.21678	0.334504	0.329588	0.189602	0.119031	0.0514007	0.110368	0.312596	0.409523	0.322829	0.204172	0.143788	0.190657	0.160491	0.0610963	0.0612001	0.0478413	0.226875	0.290773	0.377214
0	0.0885077	0.000724464	0.00471586	0.0422036	0.0656831	0.00140946	0.130235	0.00233187	0.00504588	0.000455299	0.0149346	0.34451	0.017334	0.000985023	0.0601721	0.0893423	0.00483233	0.229255	0.0026871	0.0163263	0.0263355	0.556017	0.0871667	0.00370441	0.0474994	0.0122569	0.0397971	0.0211994	0.00323553	0.00966693	0.00497348	0.0176191	0.0100191	0.00653571	0.00462458	0.204165	0.0628299	0.00130138	0.0756709	0.35242	0.00338126	0.0231903	0.000222201	0.00757675	0.237443	0.0117173	0.000119316	0.193614	0.00739158
0	0.163111	0.0257413	0.033717	0.268884	0.179841	0.111535	0.121236	0.167659	0.0422451	0.0686889	0.116812	0.129212	0.401768	0.272401	0.212045	0.194732	0.302953	0.0946387	0.404231	0.309011	0.242152	0.14298	0.130885	0.0929144	0.198989	0.382373	0.349762	0.394348	0.172988	0.249837	0.395561	0.402867	0.209602	0.131636	0.0547475	0.110756	0.357545	0.509716	0.372233	0.188917	0.122005	0.234071	0.0903811	0.052798	0.0678319	0.0426743	0.200985	0.283275	0.438947
0	0.169354	0.0577301	0.0239712	0.417517	0.240167	0.166809	0.22629	0.122177	0.0270908	0.0402251	0.334901	0.126756	0.196826	0.323787	0.231498	0.186942	0.12696	0.665594	0.0869785	0.371898	0.291444	0.322348	0.206444	0.491616	0.181844	0.208122	0.140581	0.456181	0.166113	0.323232	0.264025	0.297758	0.150545	0.170149	0.125904	0.212719	0.114619	0.0891997	0.145788	0.222076	0.280372	0.274447	0.0930576	0.346462	0.17796	0.22323	0.344063	0.206126	0.284578
0	0.163747	0.105498	0.040484	0.332433	0.537232	0.232268	0.506006	0.411191	0.102565	0.0568756	0.777429	0.388719	0.461485	0.514694	0.692721	0.576232	0.365565	0.639912	0.41128	0.596688	0.87727	0.490671	0.117247	0.241356	0.36639	0.442653	0.414055	0.512246	0.454622	0.63788	0.450725	0.548862	0.268078	0.886523	0.184641	0.283672	0.252494	0.140417	0.355597	0.763168	0.756582	0.737189	0.378681	0.182238	0.300853	0.562878	0.969089	0.709594	0.325718
0	0.156183	0.0391074	0.0303116	0.331016	0.360456	0.11746	0.266853	0.188005	0.077733	0.0498686	0.268865	0.185422	0.299905	0.263726	0.32299	0.216327	0.390932	0.15327	0.395871	0.296808	0.349182	0.339294	0.103853	0.161478	0.180985	0.366226	0.31658	0.35622	0.248284	0.241092	0.353468	0.429891	0.201299	0.275013	0.0785623	0.146063	0.816029	0.633587	0.732638	0.431891	0.220506	0.28338	0.120773	0.0540296	0.0798261	0.113555	0.284291	0.583619	0.401168
0	0.152093	0.0301005	0.020164	0.183429	0.180174	0.0698861	0.102087	0.17104	0.0267597	0.0351728	0.146412	0.112809	0.294042	0.246478	0.20309	0.111839	0.259021	0.0901216	0.360427	0.220288	0.219741	0.138679	0.083224	0.0735104	0.204896	0.283428	0.268001	0.364432	0.162817	0.18541	0.352789	0.308567	0.130712	0.147686	0.038056	0.0871906	0.301924	0.372712	0.329455	0.220069	0.12044	0.195845	0.0956519	0.0464902	0.0537648	0.0472379	0.208831	0.29845	0.30852
0	0.125413	0.0434398	0.0235096	0.32211	0.243259	0.240397	0.3346	0.186169	0.152532	0.0391724	0.49123	0.163061	0.330397	0.518296	0.408343	0.225803	0.183039	0.360958	0.12041	0.240594	0.373141	0.287845	0.144235	0.291525	0.260386	0.328577	0.189829	0.284548	0.223289	0.285656	0.263444	0.250845	0.18183	0.30804	0.18136	0.21604	0.162661	0.12585	0.238319	0.335957	0.325473	0.397481	0.183995	0.136896	0.164493	0.253298	0.516368	0.328736	0.427828
0	0.274689	0.122926	0.075035	0.599261	0.887396	0.294157	0.573646	0.533592	0.214564	0.126998	0.660745	0.331482	0.740042	0.513625	0.789344	0.520104	0.509799	0.398582	0.301234	0.594635	0.63924	0.435342	0.220443	0.259003	0.563858	0.875302	0.577071	0.635639	0.596068	0.465064	0.550555	0.590773	0.568003	0.687881	0.294976	0.333667	0.214849	0.265664	0.449198	0.600104	0.491842	0.511079	0.228491	0.187876	0.164376	0.391448	0.628267	0.81139	0.718304
0	0.196487	0.0359859	0.0256039	0.279874	0.491469	0.142253	0.195266	0.289499	0.0219588	0.0390039	0.165046	0.218832	0.362658	0.266352	0.406682	0.247459	0.575509	0.172183	0.969592	0.301839	0.413712	0.360778	0.0867553	0.122774	0.192492	0.492671	0.458275	0.314461	0.303605	0.185601	0.537432	0.656784	0.168663	0.290689	0.0668131	0.108008	0.315158	0.280568	0.973158	0.461559	0.168252	0.2785	0.0883433	0.0236355	0.0294678	0.111678	0.219634	0.803342	0.4909
0	0.230891	0.0265316	0.0359181	0.260921	0.13273	0.082571	0.0729972	0.209847	0.280663	0.0617915	0.0859893	0.127512	0.365784	0.256776	0.209593	0.202283	0.321096	0.118301	0.486897	0.376957	0.292545	0.174214	0.092139	0.0528657	0.206386	0.307691	0.213229	0.413124	0.103239	0.235381	0.367096	0.414128	0.154528	0.183541	0.0407477	0.0818194	0.511656	0.513024	0.387093	0.177913	0.114565	0.241409	0.0982289	0.0361194	0.0316374	0.0689094	0.159054	0.4976	0.191051
0	0.16592	0.0570193	0.0236515	0.413301	0.240689	0.167636	0.228544	0.126234	0.034237	0.0399568	0.340291	0.128701	0.199915	0.322922	0.234457	0.189732	0.128606	0.656688	0.0902749	0.371243	0.294627	0.321523	0.20154	0.477699	0.183764	0.209371	0.144109	0.452024	0.170075	0.321104	0.260945	0.295086	0.153199	0.17758	0.127582	0.212492	0.117002	0.0901832	0.148051	0.226317	0.284081	0.275383	0.0967506	0.338962	0.175739	0.230302	0.350077	0.213514	0.281021
0	0.193422	0.114958	0.0604208	0.455781	0.520201	0.219243	0.47115	0.456275	0.102525	0.107588	0.784672	0.4105	0.526736	0.38371	0.60232	0.574489	0.32659	0.498896	0.193317	0.489365	0.581151	0.600651	0.205044	0.316707	0.416976	0.627699	0.364574	0.426823	0.382286	0.430635	0.305117	0.494703	0.705165	0.514306	0.369351	0.491641	0.282667	0.183799	0.38798	0.58487	0.593134	0.520072	0.252331	0.257303	0.331825	0.431846	0.524182	0.611267	0.397103
0	0.16759	0.027491	0.0384667	0.292891	0.29427	0.117176	0.248271	0.165098	0.0895128	0.078788	0.229794	0.13834	0.299583	0.238355	0.358677	0.212339	0.311243	0.167326	0.385355	0.294988	0.27916	0.229582	0.138183	0.131645	0.213024	0.373872	0.284355	0.42164	0.206741	0.215862	0.31188	0.380086	0.280754	0.241173	0.0806662	0.16668	0.406179	0.43527	0.49728	0.304161	0.219542	0.214794	0.122806	0.0726367	0.0894515	0.0861625	0.266009	0.38113	0.366313
0	0.242075	0.0893636	0.0690234	0.524709	0.5341	0.186982	0.498089	0.394586	0.0977993	0.10853	0.7574	0.34345	0.751678	0.811063	0.851761	0.596376	0.426147	0.613925	0.529916	0.669274	0.799966	0.456649	0.248936	0.416684	0.523405	0.696755	0.446332	0.691439	0.407703	0.569623	0.57661	0.655456	0.42765	0.66816	0.233578	0.307772	0.508992	0.412921	0.616403	0.693702	0.870075	0.637414	0.563707	0.435403	0.346452	0.395863	0.818918	0.711566	0.900703
0	0.272775	0.151986	0.0476147	0.784211	0.854145	0.303276	0.863501	0.631583	0.119609	0.069143	0.887036	0.569486	0.571072	0.50526	0.729673	0.751809	0.521943	0.65103	0.262087	0.692084	0.806808	0.512531	0.304814	0.755784	0.488569	0.867756	0.449667	0.532203	0.524825	0.646726	0.500473	0.727081	0.471607	0.604674	0.460653	0.415745	0.577156	0.320797	0.572325	0.638373	0.677704	0.728356	0.165454	0.180712	0.356088	0.244989	0.620483	0.69841	0.560985
0	0.154598	0.0268994	0.0411424	0.282842	0.268864	0.0979033	0.201708	0.148341	0.0446115	0.0915051	0.222486	0.123866	0.270438	0.220225	0.478218	0.192964	0.256588	0.236493	0.524785	0.318462	0.309108	0.174155	0.144754	0.108473	0.239271	0.340399	0.232388	0.382343	0.205649	0.224361	0.306094	0.398308	0.296888	0.227512	0.0866985	0.173781	0.279272	0.295928	0.380495	0.289685	0.210114	0.210435	0.122845	0.0957428	0.0956912	0.0876329	0.228017	0.309908	0.391002
0	0.184206	0.0350975	0.0209106	0.168232	0.317161	0.0950288	0.125125	0.210928	0.0276626	0.0387577	0.125816	0.109465	0.26824	0.217025	0.274183	0.125688	0.293882	0.105689	0.404759	0.21443	0.232284	0.172146	0.0854523	0.0773764	0.160129	0.343038	0.239963	0.284312	0.14376	0.160678	0.437796	0.336183	0.153795	0.181198	0.0401133	0.10322	0.40245	0.547803	0.457998	0.279483	0.112244	0.192053	0.067431	0.0662184	0.047259	0.0532221	0.190737	0.35539	0.358668
0	0.131685	0.0286005	0.0326013	0.217773	0.203692	0.112587	0.138147	0.184599	0.0630027	0.0617854	0.123375	0.132727	0.380432	0.408225	0.209199	0.182909	0.294263	0.0925134	0.440412	0.301439	0.255438	0.155906	0.103421	0.100229	0.198184	0.300353	0.326678	0.468465	0.161459	0.23425	0.449219	0.413847	0.199795	0.187099	0.0456189	0.098366	0.354117	0.462133	0.400735	0.239219	0.131519	0.203673	0.0859558	0.0415789	0.0623265	0.0518187	0.295658	0.315104	0.321594
0	0.114631	0.0275483	0.0225077	0.24031	0.252741	0.0967259	0.198333	0.17662	0.0850633	0.0352758	0.244886	0.171991	0.266398	0.214707	0.261463	0.242351	0.367816	0.149376	0.425068	0.26466	0.270047	0.257471	0.0840646	0.12053	0.206456	0.322951	0.225716	0.244562	0.161312	0.241462	0.257087	0.450901	0.261621	0.2169	0.0782562	0.139966	0.615362	0.481258	0.53647	0.317802	0.197162	0.29281	0.152098	0.104491	0.0955954	0.0956592	0.182212	0.390701	0.368394
0	0.154711	0.0455542	0.0180418	0.306755	0.43628	0.141618	0.327495	0.174504	0.0257949	0.0314416	0.380643	0.201642	0.146586	0.242551	0.256022	0.173711	0.134878	0.320809	0.0537795	0.138259	0.272628	0.378352	0.112517	0.460168	0.178848	0.192077	0.183421	0.17993	0.256089	0.121955	0.156887	0.196537	0.107229	0.243225	0.0990096	0.227182	0.13071	0.0612926	0.13949	0.317522	0.240253	0.282205	0.0459363	0.184445	0.140462	0.211173	0.156353	0.203991	0.167893
0	0.142447	0.0556789	0.0209999	0.310168	0.412651	0.21747	0.475203	0.234194	0.124495	0.0383682	0.609454	0.198095	0.323439	0.34764	0.363256	0.327448	0.170615	0.397695	0.148219	0.330722	0.431121	0.3461	0.102404	0.129226	0.275891	0.297053	0.269656	0.363746	0.35212	0.276288	0.201668	0.245541	0.209078	0.469627	0.160533	0.256946	0.178013	0.126293	0.20814	0.319336	0.467341	0.366691	0.251111	0.164073	0.199553	0.333907	0.555132	0.335053	0.366457
0	0.143878	0.00373191	0.00622889	0.108034	0.038851	0.00405147	0.0682553	0.0143017	0.0301361	0.00113743	0.0528953	0.261083	0.0449875	0.00181968	0.071838	0.110421	0.0189619	0.632666	0.00785306	0.0348484	0.0575522	0.43505	0.268507	0.000492594	0.215094	0.0204968	0.0185591	0.0463617	0.000763554	0.01135	0.0120753	0.0183895	0.0449229	0.0091116	0.0372669	0.518296	0.0672196	0.00512206	0.122301	0.226381	0.00718802	0.0367907	0.000175951	0.0119644	0.19778	0.0137275	5.42428e-05	0.080184	0.00577512
0	0.197062	0.0493659	0.0359032	0.279719	0.39474	0.119601	0.218278	0.224471	0.0668625	0.0731543	0.221095	0.172449	0.285042	0.211714	0.368154	0.192565	0.40353	0.160246	0.442546	0.253164	0.263043	0.257066	0.128599	0.155907	0.195031	0.485295	0.327615	0.396409	0.24309	0.200749	0.400927	0.431147	0.34847	0.253577	0.0924979	0.189692	0.607107	0.583619	0.623642	0.370692	0.20317	0.188322	0.0824746	0.0879882	0.0671667	0.089014	0.241277	0.355281	0.379532
0	0.227183	0.0341642	0.0383172	0.260692	0.177178	0.113308	0.133422	0.179002	0.171303	0.0637507	0.170633	0.131771	0.273104	0.217038	0.212824	0.232818	0.294331	0.132564	0.334199	0.329262	0.277517	0.216525	0.0966695	0.071385	0.187768	0.324615	0.177998	0.434671	0.115932	0.225925	0.269573	0.388718	0.166742	0.23746	0.0525473	0.0989418	0.51044	0.451618	0.433307	0.220407	0.182517	0.235654	0.159386	0.0714667	0.0558577	0.0854627	0.166141	0.459374	0.278906
0	0.165664	0.0263257	0.0572155	0.348167	0.35339	0.142353	0.180617	0.316964	0.337093	0.087943	0.207372	0.16414	0.402671	0.459871	0.4673	0.238445	0.488048	0.222226	0.803048	0.480497	0.391013	0.232175	0.22911	0.225984	0.239969	0.5581	0.332551	0.664661	0.22075	0.381989	0.447435	0.574565	0.342166	0.275898	0.108734	0.148567	0.577577	0.84639	0.723551	0.415021	0.178637	0.32483	0.101756	0.0908083	0.0685729	0.159721	0.365377	0.639482	0.360834
0	0.116115	0.0263633	0.0401804	0.166778	0.225909	0.144046	0.154215	0.229443	0.119377	0.0764718	0.160659	0.139079	0.351916	0.389276	0.259501	0.158733	0.319735	0.0894553	0.412182	0.263089	0.28684	0.227746	0.0746844	0.0777674	0.191137	0.29202	0.224936	0.366611	0.130203	0.228262	0.40602	0.406933	0.241809	0.311236	0.0677135	0.118264	0.526087	0.482675	0.582167	0.382243	0.154714	0.251523	0.138363	0.0890165	0.0508431	0.0816513	0.359832	0.510746	0.392613
0	0.0847322	0.0394416	0.0156901	0.305471	0.271476	0.18428	0.290972	0.225882	0.200806	0.0329462	0.470458	0.181345	0.267883	0.295773	0.306179	0.254758	0.167909	0.418734	0.164403	0.335346	0.367785	0.307779	0.078944	0.150768	0.228388	0.237765	0.230618	0.329813	0.271126	0.253784	0.179488	0.224034	0.211236	0.357663	0.164463	0.208691	0.173833	0.110411	0.199998	0.33351	0.367153	0.298592	0.178939	0.150303	0.120996	0.394398	0.473691	0.38524	0.187813
0	0.143108	0.0936995	0.0445543	0.797489	0.44723	0.346504	0.502578	0.565863	0.362336	0.0855192	0.703914	0.369292	0.7192	0.524307	0.821507	0.621864	0.26406	0.818354	0.241058	0.606848	0.661433	0.561241	0.226683	0.269691	0.675133	0.70523	0.445701	0.603728	0.564781	0.568372	0.361351	0.480003	0.638099	0.556934	0.34175	0.401612	0.172052	0.125596	0.226866	0.402261	0.870465	0.589699	0.592039	0.0975583	0.379891	0.692726	0.684683	0.514706	0.584722
0	0.120816	0.0724976	0.0288448	0.31297	0.476108	0.121178	0.341933	0.244247	0.064071	0.0530035	0.423549	0.170628	0.357559	0.404428	0.546653	0.301153	0.253383	0.349768	0.188494	0.381057	0.369972	0.189846	0.137786	0.279752	0.335185	0.460406	0.323625	0.495035	0.511211	0.331881	0.39457	0.515687	0.462358	0.286645	0.236186	0.329607	0.0965321	0.110215	0.229114	0.518214	0.411749	0.26475	0.132195	0.195972	0.138148	0.218298	0.563313	0.399103	0.286315
0	0.183213	0.101833	0.0385754	0.435501	0.560616	0.218026	0.480831	0.434581	0.157674	0.0564831	0.704633	0.353326	0.478251	0.515582	0.745015	0.481223	0.34243	0.762646	0.415525	0.638262	0.879263	0.498063	0.145607	0.247595	0.387747	0.468168	0.396833	0.539415	0.432904	0.607533	0.430449	0.51788	0.263361	0.879463	0.193517	0.271972	0.228015	0.137993	0.327091	0.639079	0.681486	0.690322	0.325915	0.176671	0.258058	0.545037	0.906371	0.665336	0.300756
0	0.151733	0.0555214	0.0198924	0.372559	0.427212	0.0914406	0.214248	0.286084	0.0483127	0.0349562	0.196202	0.226535	0.374095	0.302457	0.289107	0.290733	0.408248	0.162396	0.576502	0.377299	0.375046	0.321872	0.09733	0.204706	0.243167	0.328781	0.49754	0.440179	0.370507	0.267802	0.428024	0.431552	0.209248	0.24647	0.0821567	0.125283	0.717175	0.610509	0.740852	0.43358	0.244913	0.286332	0.0982927	0.0352445	0.0828893	0.124305	0.362103	0.537246	0.283972
0	0.0831936	0.000582829	0.00261406	0.116476	0.0820666	6.07243e-05	0.143991	0.001426	0.00127721	0.000388694	0.0112184	0.30519	0.0196932	0.000177177	0.068208	0.094559	0.000782983	0.329699	0.0014146	0.0160383	0.0139907	0.651015	0.0660319	0.000601654	0.0381271	0.00994881	0.0439745	0.033098	0.0036065	0.00454031	0.00653878	0.0116965	0.021622	0.00613583	0.00338648	0.267471	0.0172186	2.30353e-05	0.0280528	0.197497	0.00241264	0.00730372	5.06595e-05	0.00468827	0.161948	0.00760461	1.46435e-05	0.133203	0.00592615
0	0.240242	0.148142	0.0611892	0.775444	0.557815	0.198707	0.450547	0.440028	0.10865	0.0949363	0.598855	0.344184	0.553159	0.343183	0.471968	0.513107	0.292079	0.490847	0.130576	0.445032	0.417888	0.552384	0.339664	0.696427	0.467996	0.599274	0.630321	0.625093	0.680742	0.423296	0.39599	0.503782	0.716676	0.319552	0.313754	0.471225	0.17794	0.152839	0.308752	0.450139	0.485359	0.35346	0.121164	0.159019	0.238772	0.36848	0.398325	0.422776	0.292787
0	0.0869476	0.000529697	0.00440189	0.0387012	0.0530196	0.00140838	0.114702	0.00128575	0.00274358	0.0004881	0.0136397	0.274092	0.0140384	0.000924447	0.0536072	0.076191	0.00375118	0.195787	0.00221168	0.00992483	0.0174952	0.418678	0.0931328	0.00264328	0.0408253	0.0119928	0.0317581	0.0169135	0.00255742	0.00664516	0.00343726	0.0147477	0.00679855	0.00538471	0.00381502	0.188402	0.0507304	0.000952302	0.057371	0.273059	0.00297598	0.0190699	0.000176589	0.00885772	0.274595	0.00810418	9.61748e-05	0.157177	0.00917074
0	0.182685	0.0843148	0.0483014	0.495071	0.485298	0.234139	0.424939	0.486305	0.118801	0.0825341	0.662218	0.398902	0.524352	0.440221	0.687418	0.557539	0.332722	0.58991	0.276166	0.558072	0.684211	0.561016	0.201947	0.349634	0.43362	0.571907	0.389233	0.561862	0.401477	0.480229	0.401617	0.523213	0.552682	0.624885	0.281271	0.393549	0.212411	0.137578	0.314687	0.517346	0.667211	0.56097	0.264113	0.199142	0.288521	0.460027	0.647298	0.646989	0.349623
0	0.229865	0.110489	0.0597484	0.308747	0.57752	0.246198	0.578254	0.384759	0.130268	0.100636	0.867578	0.351242	0.4965	0.452604	0.575131	0.514112	0.352922	0.373448	0.207017	0.456465	0.641605	0.522031	0.156036	0.24132	0.33105	0.546543	0.339947	0.416776	0.386262	0.384766	0.331642	0.407719	0.55311	0.549357	0.338117	0.44281	0.338993	0.235381	0.504282	0.726799	0.575477	0.543483	0.299598	0.268125	0.285232	0.372703	0.657431	0.615684	0.466634
0	0.32684	0.0510783	0.0715851	0.945782	0.361852	0.250875	0.753036	0.621179	0.203859	0.124549	0.750524	0.598875	0.928601	0.596436	0.71849	0.780761	0.639454	0.587228	0.325179	0.786205	0.888884	0.857541	0.331457	0.80404	0.636284	0.839555	0.329409	0.758114	0.925562	0.897105	0.704177	0.810703	0.661312	0.599937	0.330995	0.460849	0.499594	0.381256	0.758785	0.95881	0.712788	0.816022	0.201933	0.135998	0.335614	0.410576	0.862053	0.86558	0.617432
0	0.290366	0.17726	0.0907308	0.808308	0.823486	0.257769	0.632225	0.492144	0.134296	0.0614633	0.693427	0.437767	0.631661	0.442514	0.687151	0.490712	0.371087	0.544341	0.17092	0.486405	0.567946	0.68193	0.311852	0.78695	0.541123	0.714269	0.642644	0.659666	0.742408	0.513015	0.462503	0.541177	0.575064	0.40604	0.299347	0.473802	0.235116	0.188718	0.390551	0.542917	0.581269	0.489564	0.223217	0.270422	0.26586	0.377201	0.482644	0.477268	0.501536
0	0.208497	0.0544749	0.0269634	0.203498	0.304627	0.101334	0.174343	0.226418	0.0672636	0.0453715	0.187073	0.140337	0.307567	0.241841	0.322635	0.1998	0.361092	0.132759	0.450574	0.269076	0.256928	0.220045	0.0880638	0.115306	0.207638	0.353092	0.324345	0.362601	0.21562	0.224327	0.388556	0.407018	0.170425	0.229971	0.0526941	0.119087	0.48001	0.526011	0.583387	0.36252	0.163956	0.228002	0.0928776	0.0349531	0.0630305	0.0816625	0.290415	0.459511	0.371203
0	0.113432	0.0226265	0.0174907	0.264097	0.27126	0.101282	0.125095	0.195132	0.0738452	0.0266783	0.105941	0.111169	0.315749	0.507236	0.171613	0.188206	0.323337	0.0743784	0.488388	0.310281	0.241523	0.223689	0.123675	0.0814765	0.114275	0.174931	0.285724	0.561765	0.0997172	0.246484	0.651929	0.579573	0.110128	0.205561	0.015079	0.0779739	0.462982	0.657143	0.460376	0.278419	0.0827039	0.224908	0.0374397	0.0191442	0.0211243	0.0513043	0.226272	0.341042	0.175718
0	0.0775177	0.00151749	0.00209133	0.0445387	0.0913709	0.00139787	0.373119	0.00286533	0.0134172	0.000491801	0.0453903	0.406855	0.00584873	0.00100936	0.0711082	0.11024	0.00586849	0.212475	0.000891606	0.0110214	0.0371037	0.817812	0.0608437	0.00331643	0.0422119	0.0184856	0.026768	0.0119903	0.00365846	0.00422696	0.00305346	0.00574169	0.00737674	0.0101555	0.0167843	0.229822	0.0580389	0.00087517	0.0648951	0.413749	0.00705774	0.0192782	0.000940427	0.00799145	0.256622	0.0286466	0.000290204	0.214833	0.00870774
0	0.27035	0.236622	0.041797	0.892623	0.692772	0.295781	0.651812	0.499744	0.184104	0.0646616	0.712745	0.397557	0.691702	0.445571	0.665799	0.599157	0.352372	0.585719	0.201374	0.640481	0.621814	0.779705	0.313867	0.551116	0.49177	0.681531	0.607806	0.664289	0.624869	0.544143	0.455346	0.558199	0.510761	0.509939	0.330307	0.411937	0.315832	0.247098	0.432338	0.535072	0.555389	0.524526	0.228368	0.143152	0.306494	0.392579	0.579003	0.586934	0.5263
0	0.143058	0.0257286	0.0402009	0.220673	0.259802	0.145724	0.205621	0.215343	0.129092	0.0772387	0.198388	0.14547	0.338611	0.295317	0.270327	0.185281	0.343855	0.0979667	0.342731	0.260543	0.278181	0.260921	0.0967804	0.0992122	0.189967	0.353046	0.246859	0.353038	0.155543	0.223596	0.344737	0.38851	0.26521	0.301458	0.0783945	0.142623	0.563905	0.524111	0.619397	0.375675	0.185343	0.259729	0.145611	0.0892817	0.0633458	0.0877365	0.322249	0.518165	0.419613
0	0.1712	0.0275077	0.0349723	0.293377	0.290825	0.127666	0.257108	0.177559	0.111909	0.0661375	0.217742	0.149605	0.334584	0.254526	0.248769	0.225374	0.350667	0.108459	0.298657	0.279897	0.253643	0.255691	0.129131	0.139407	0.192939	0.394741	0.32697	0.430518	0.198653	0.216695	0.325183	0.376981	0.259947	0.231513	0.0724824	0.151734	0.494102	0.538802	0.553925	0.295001	0.207172	0.227018	0.118335	0.0550425	0.0821697	0.0786279	0.274388	0.413136	0.360086
0	0.225	0.197368	0.0779373	0.830029	0.863172	0.229132	0.628207	0.588835	0.162596	0.168754	0.569005	0.474818	0.86883	0.533554	0.889705	0.571739	0.598808	0.60268	0.460995	0.852799	0.805718	0.620905	0.350399	0.603825	0.602536	0.758974	0.910054	0.804577	0.759726	0.721603	0.722243	0.750765	0.810628	0.563767	0.325703	0.463493	0.415211	0.381681	0.689521	0.824301	0.565672	0.604389	0.167642	0.292266	0.249731	0.365631	0.70665	0.772903	0.346857
0	0.209985	0.0362195	0.0356061	0.248662	0.191412	0.114624	0.148237	0.166361	0.105845	0.059018	0.194349	0.130124	0.247054	0.207576	0.213581	0.221536	0.276838	0.132511	0.29817	0.291991	0.26127	0.216552	0.0957626	0.0785912	0.186288	0.320919	0.191385	0.428973	0.131934	0.214368	0.249877	0.362867	0.164476	0.238635	0.0535577	0.102771	0.466345	0.40901	0.424972	0.234157	0.193711	0.224257	0.16706	0.0779	0.0636133	0.0838559	0.177003	0.412079	0.309214
0	0.0861726	0.000432937	0.00424592	0.0369612	0.0467285	0.00140785	0.106986	0.000766032	0.0015998	0.000504396	0.0129964	0.239109	0.0124012	0.000894353	0.0503458	0.0696575	0.00321407	0.17916	0.00197549	0.00674458	0.0131034	0.350448	0.0960968	0.00211612	0.0375096	0.0118616	0.0277644	0.0147842	0.00222053	0.00514395	0.00267406	0.0133212	0.00519857	0.00481289	0.00341283	0.180571	0.0447193	0.000778881	0.0482797	0.233632	0.00277464	0.0170228	0.000153929	0.00949409	0.293052	0.00630917	8.46785e-05	0.139076	0.0100546
0	0.158461	0.0319417	0.0902426	0.410472	0.497683	0.134837	0.27833	0.233815	0.112292	0.132247	0.246497	0.188752	0.444713	0.746239	0.507871	0.348582	0.55847	0.189103	0.761308	0.635776	0.491374	0.254006	0.300918	0.334457	0.230984	0.600993	0.456036	0.740518	0.307191	0.507739	0.396915	0.464123	0.473578	0.282996	0.171505	0.199658	0.635364	0.991155	0.918722	0.712882	0.213737	0.353321	0.117407	0.0839029	0.0631945	0.174999	0.558074	0.714863	0.241484
0	0.172309	0.0500682	0.0273031	0.291253	0.362433	0.10821	0.22837	0.207119	0.0526888	0.0420185	0.254403	0.180745	0.291519	0.261988	0.349807	0.204899	0.395563	0.158673	0.446749	0.294396	0.34968	0.319215	0.0881818	0.15032	0.18597	0.352714	0.310146	0.328502	0.253068	0.248645	0.38388	0.447318	0.163564	0.269851	0.0706411	0.131424	0.807215	0.634173	0.742952	0.456313	0.200734	0.287316	0.11158	0.0469142	0.0727361	0.113161	0.289192	0.598092	0.42235
0	0.153052	0.0463608	0.0183698	0.311686	0.43178	0.139733	0.32542	0.17682	0.0298416	0.0320661	0.382664	0.201512	0.152367	0.243667	0.258165	0.176738	0.135913	0.321639	0.0542375	0.142375	0.273568	0.37624	0.115537	0.45874	0.181353	0.196869	0.187272	0.184495	0.260629	0.129032	0.158581	0.201388	0.111067	0.241067	0.100742	0.227221	0.129322	0.0608544	0.139095	0.31691	0.243946	0.284245	0.0489266	0.192311	0.143708	0.212575	0.159915	0.207466	0.171984
0	0.289075	0.221274	0.0467174	0.753216	0.987446	0.270816	0.661132	0.547681	0.150917	0.0708212	0.688464	0.472496	0.624602	0.525526	0.642197	0.535644	0.362666	0.52234	0.154249	0.471834	0.575308	0.740575	0.272139	0.984848	0.481327	0.608206	0.637708	0.556072	0.732289	0.515689	0.46346	0.488151	0.412033	0.413919	0.27336	0.415635	0.239355	0.189572	0.382365	0.539028	0.521603	0.543156	0.20216	0.182208	0.266222	0.380714	0.61348	0.492559	0.49155
0	0.226678	0.134746	0.0262912	0.549848	0.948608	0.18885	0.708129	0.426039	0.061869	0.0420852	0.653741	0.412601	0.481299	0.636118	0.583233	0.426063	0.336154	0.488788	0.185397	0.451095	0.709913	0.71714	0.246618	0.970786	0.339058	0.45579	0.577896	0.409732	0.714949	0.405036	0.452273	0.372159	0.285141	0.412944	0.24541	0.317024	0.327609	0.218855	0.462826	0.6579	0.550671	0.628703	0.142446	0.157391	0.241445	0.375733	0.877856	0.518529	0.353483
0	0.159105	0.0545488	0.0214671	0.378597	0.421669	0.0928556	0.226411	0.280907	0.0442021	0.0359188	0.214235	0.2275	0.378895	0.309307	0.295708	0.288722	0.412212	0.166341	0.569242	0.38496	0.397129	0.330766	0.104477	0.200499	0.249693	0.333453	0.476866	0.453493	0.356877	0.293006	0.432566	0.453608	0.206684	0.259538	0.0820298	0.129978	0.73958	0.619639	0.749087	0.436545	0.251948	0.317109	0.113821	0.037966	0.0881449	0.122561	0.379117	0.526656	0.359582
0	0.220978	0.101063	0.0424945	0.652155	0.725433	0.278225	0.912306	0.679756	0.289294	0.0619403	0.981371	0.532514	0.453126	0.505161	0.917681	0.608602	0.533354	0.682119	0.267476	0.655901	0.784205	0.748153	0.325772	0.762289	0.503502	0.923475	0.311931	0.492468	0.394255	0.668681	0.522731	0.74442	0.515345	0.808398	0.507292	0.453195	0.673475	0.378642	0.628087	0.668548	0.760146	0.736946	0.32842	0.194051	0.388644	0.491364	0.706298	0.893916	0.610347
0	0.151471	0.0287151	0.0230224	0.203283	0.168075	0.0767228	0.104293	0.166683	0.0294956	0.042117	0.141895	0.116658	0.319711	0.254717	0.19875	0.128524	0.265384	0.0896869	0.36587	0.239836	0.223363	0.136578	0.0934179	0.077455	0.207575	0.299701	0.288519	0.377947	0.166876	0.201556	0.35457	0.326474	0.14585	0.14113	0.0415115	0.0909321	0.304683	0.386793	0.327265	0.208095	0.121515	0.204417	0.0969812	0.0461379	0.0574606	0.045662	0.208832	0.289629	0.332797
0	0.27988	0.234227	0.041484	0.82803	0.845451	0.283428	0.660426	0.525645	0.166525	0.066132	0.701713	0.439985	0.655001	0.488001	0.647637	0.570689	0.352071	0.558254	0.172912	0.554014	0.597393	0.773354	0.293801	0.793584	0.481566	0.632788	0.624113	0.60504	0.681088	0.53216	0.456382	0.518681	0.451185	0.454448	0.300947	0.414177	0.279792	0.216722	0.405572	0.534762	0.537662	0.536752	0.213972	0.158377	0.290431	0.38662	0.600403	0.531055	0.501496
0	0.308397	0.174099	0.0924381	0.884138	0.802576	0.242072	0.596199	0.462897	0.110086	0.0692379	0.699988	0.385428	0.670951	0.476775	0.718429	0.466193	0.439809	0.505931	0.226795	0.586776	0.659853	0.556584	0.312806	0.607212	0.534739	0.818054	0.772494	0.780535	0.547855	0.603884	0.601852	0.649593	0.702049	0.403013	0.337387	0.455318	0.22486	0.251312	0.459873	0.573217	0.611494	0.566849	0.218778	0.253317	0.233058	0.340845	0.614882	0.475235	0.565746
0	0.159786	0.0332392	0.0292565	0.20667	0.352723	0.0891365	0.144667	0.236815	0.0447105	0.0445589	0.11986	0.142679	0.306256	0.305039	0.304823	0.163548	0.390522	0.125068	0.549983	0.289631	0.3284	0.237908	0.0948754	0.0955012	0.149777	0.324594	0.331008	0.384755	0.148035	0.231251	0.582627	0.555552	0.156852	0.212908	0.0348151	0.110661	0.589056	0.628364	0.564879	0.369767	0.120755	0.290306	0.0446236	0.0489369	0.040703	0.0608012	0.196312	0.432382	0.281132
0	0.147286	0.00399259	0.00622693	0.119641	0.0473263	0.00517824	0.0752343	0.015172	0.0317251	0.00112722	0.057527	0.320563	0.0491983	0.00217514	0.0791831	0.119127	0.0207536	0.710422	0.00855981	0.0416872	0.061918	0.529723	0.285327	0.000746135	0.228969	0.0207526	0.0235477	0.0563873	0.001244	0.0147604	0.0141397	0.0200724	0.0489782	0.0108087	0.0395194	0.550369	0.0685247	0.00554354	0.133848	0.260152	0.00755208	0.036759	0.000188008	0.0110189	0.157346	0.0149389	5.91061e-05	0.0883476	0.00414488
0	0.151577	0.0687452	0.0266689	0.379465	0.419599	0.169111	0.449829	0.237916	0.0967892	0.0461074	0.580844	0.204262	0.340324	0.342143	0.367491	0.320591	0.168704	0.358246	0.0974268	0.28338	0.390152	0.348136	0.162621	0.275539	0.283029	0.339707	0.293668	0.345499	0.398065	0.306931	0.215608	0.298619	0.208502	0.368669	0.152601	0.262991	0.135806	0.0944566	0.172942	0.304301	0.443126	0.385474	0.218925	0.289156	0.249963	0.259121	0.437394	0.29335	0.408864
0	0.0824749	0.046008	0.0290199	0.361746	0.26862	0.1046	0.215385	0.217122	0.161576	0.0530856	0.367943	0.157411	0.300993	0.274942	0.338488	0.266203	0.159087	0.330353	0.0972633	0.291513	0.252815	0.212269	0.185931	0.279479	0.27253	0.314987	0.227157	0.338893	0.347127	0.285377	0.210893	0.352764	0.312088	0.210212	0.161484	0.224686	0.0678223	0.0528866	0.119561	0.309262	0.37328	0.266865	0.131691	0.30862	0.179388	0.249574	0.253783	0.322207	0.258006
0	0.258033	0.0339123	0.0912578	0.0732193	0.0932583	0.0649902	0.0909892	0.0900485	0.0384608	0.0953383	0.116701	0.0751377	0.20451	0.151273	0.105587	0.127214	0.315707	0.0409216	0.156775	0.234852	0.194512	0.0858421	0.077992	0.0334958	0.181253	0.259277	0.0534287	0.215457	0.0307469	0.162061	0.193739	0.229194	0.114882	0.426918	0.0692127	0.080598	0.300112	0.298671	0.295497	0.131462	0.118907	0.15426	0.444082	0.231446	0.0967932	0.051413	0.108524	0.118862	0.38702
0	0.144115	0.0975236	0.0485216	0.80005	0.426872	0.343587	0.507009	0.545468	0.356741	0.0950471	0.716939	0.368197	0.712014	0.546683	0.79599	0.631993	0.257889	0.791969	0.221447	0.582022	0.628109	0.549873	0.24575	0.287779	0.663607	0.7285	0.427074	0.574897	0.545742	0.555372	0.352268	0.471275	0.687519	0.53213	0.322829	0.386198	0.165387	0.12524	0.224158	0.402797	0.881974	0.573663	0.5944	0.0943076	0.398107	0.706802	0.688616	0.496238	0.625591
0	0.126137	0.0287118	0.0220597	0.229754	0.244989	0.0993687	0.181522	0.173608	0.0750692	0.0340371	0.239653	0.159428	0.254553	0.214649	0.268751	0.228335	0.356332	0.148207	0.416229	0.261777	0.257256	0.238412	0.0870481	0.129809	0.205533	0.320585	0.217052	0.268617	0.169623	0.248569	0.26689	0.438392	0.231033	0.210002	0.0763026	0.134753	0.629637	0.530352	0.57469	0.329354	0.214775	0.275379	0.163493	0.115975	0.0962301	0.096124	0.198109	0.38789	0.393194
0	0.28567	0.13011	0.0534507	0.648275	0.71648	0.306759	0.718867	0.553295	0.252846	0.0878869	0.793338	0.373823	0.569612	0.45704	0.850218	0.536663	0.434747	0.482741	0.214418	0.563582	0.609252	0.787593	0.282123	0.518179	0.53368	0.788246	0.425149	0.566916	0.476177	0.550183	0.499315	0.588371	0.51717	0.60183	0.370074	0.409366	0.460798	0.359458	0.552525	0.560682	0.639458	0.556149	0.361883	0.151075	0.318723	0.529333	0.650121	0.751513	0.740242
0	0.0806604	0.0194819	0.0268994	0.119809	0.183411	0.0715018	0.102244	0.176206	0.109673	0.0422932	0.0711201	0.107232	0.343593	0.344303	0.137846	0.171507	0.290797	0.0577017	0.591943	0.208356	0.1696	0.13514	0.0618707	0.0585009	0.148827	0.201207	0.375389	0.305338	0.124473	0.126526	0.410041	0.431597	0.15076	0.176683	0.0220895	0.0713022	0.308828	0.331288	0.291616	0.270243	0.0951371	0.120926	0.0550319	0.027596	0.0269779	0.0363503	0.19603	0.320448	0.149575
0	0.192295	0.111931	0.0364292	0.634715	0.585088	0.261866	0.85366	0.650322	0.405237	0.0544823	0.961562	0.444148	0.438426	0.47865	0.988048	0.471964	0.465318	0.677196	0.242551	0.616745	0.695724	0.993159	0.343318	0.690127	0.510708	0.871149	0.304346	0.526325	0.366595	0.640533	0.513329	0.683395	0.553052	0.872855	0.47964	0.473817	0.620433	0.37869	0.599865	0.64034	0.755679	0.658243	0.441039	0.184447	0.389709	0.683175	0.733556	0.945819	0.616946
0	0.317167	0.205529	0.0506395	0.928529	0.916793	0.239198	0.586983	0.518661	0.108439	0.0957152	0.712627	0.356456	0.733329	0.612858	0.734001	0.510694	0.529183	0.459474	0.300336	0.725265	0.819406	0.458422	0.278466	0.544866	0.485675	0.842538	0.952688	0.854852	0.308215	0.729213	0.80065	0.747245	0.736957	0.440874	0.365791	0.379588	0.216734	0.334716	0.553034	0.654557	0.609969	0.747852	0.188811	0.153678	0.184472	0.312014	0.948963	0.533294	0.611695
0	0.0982861	0.00129883	0.00415931	0.0757107	0.0692174	0.00520058	0.122519	0.00355626	0.00662952	0.000500938	0.0288023	0.406704	0.0257851	0.0020679	0.0724267	0.0939723	0.00909299	0.43394	0.00426514	0.0273929	0.0249806	0.607895	0.158694	0.00246613	0.0851984	0.0128212	0.0406366	0.0469447	0.00348572	0.015309	0.00909744	0.0178099	0.0182862	0.010051	0.0114011	0.288772	0.0445388	0.00213869	0.0806909	0.311733	0.00392287	0.0157036	0.000175201	0.00697157	0.172525	0.00898912	9.02406e-05	0.14922	0.00530186
0	0.143646	0.0559912	0.0211027	0.310257	0.415571	0.218007	0.478687	0.234254	0.122759	0.0384659	0.611866	0.198443	0.324247	0.348502	0.364222	0.328648	0.170605	0.397126	0.147717	0.330275	0.432121	0.34694	0.102901	0.129393	0.276681	0.298068	0.270293	0.364101	0.353595	0.276464	0.202038	0.24589	0.208847	0.471494	0.16034	0.257875	0.178012	0.126498	0.20818	0.319044	0.468967	0.367923	0.252205	0.164391	0.201045	0.332451	0.55606	0.333791	0.369732
0	0.0840164	0.0403873	0.0268041	0.208989	0.249563	0.0685876	0.126541	0.222206	0.101184	0.0393279	0.111993	0.167997	0.354553	0.3276	0.197945	0.200335	0.27887	0.0993996	0.403959	0.30369	0.297975	0.211586	0.0994562	0.0900298	0.178983	0.189585	0.397348	0.413974	0.162127	0.262098	0.399023	0.464277	0.153248	0.198608	0.026983	0.0979676	0.345004	0.269889	0.312689	0.332384	0.147242	0.237248	0.067623	0.0336906	0.0508634	0.0675195	0.245128	0.364592	0.179619
0	0.0846049	0.0166094	0.0209532	0.075317	0.109112	0.044704	0.0552228	0.115253	0.0435043	0.0337746	0.0502727	0.0707062	0.274378	0.16884	0.0834616	0.132447	0.162806	0.0379308	0.278679	0.111718	0.0850344	0.0788443	0.0331145	0.033715	0.114646	0.173147	0.231819	0.176168	0.0744521	0.101763	0.220723	0.226838	0.0899484	0.0865644	0.0169195	0.0554908	0.169488	0.188341	0.169197	0.145697	0.080454	0.0892522	0.0644685	0.0340102	0.0540619	0.0191114	0.10469	0.171482	0.202241
0	0.201267	0.0646358	0.0558311	0.44997	0.463573	0.193612	0.454432	0.406644	0.109983	0.0855635	0.711757	0.350476	0.650853	0.745782	0.810238	0.557075	0.39334	0.643034	0.505372	0.655084	0.845489	0.430012	0.210939	0.373447	0.453839	0.584687	0.407005	0.689287	0.383763	0.543858	0.549312	0.59904	0.376581	0.740951	0.204528	0.289594	0.391753	0.295235	0.502994	0.6673	0.852689	0.650472	0.489408	0.366807	0.304876	0.410924	0.862735	0.709714	0.659376
0	0.196337	0.108777	0.0375394	0.626343	0.591291	0.263922	0.850647	0.648542	0.401872	0.0566662	0.957805	0.440547	0.439388	0.478381	0.98933	0.47212	0.467299	0.665977	0.242164	0.612056	0.692087	0.984869	0.339729	0.681858	0.513148	0.87206	0.3027	0.524522	0.36567	0.637146	0.5145	0.680904	0.55205	0.866145	0.476763	0.471118	0.619042	0.381776	0.602151	0.638351	0.75397	0.655425	0.442534	0.183561	0.38711	0.681962	0.732913	0.944545	0.629217
0	0.155199	0.0292851	0.0217078	0.188646	0.167199	0.0792971	0.100744	0.157664	0.0264448	0.0377239	0.148892	0.109744	0.299487	0.248897	0.194517	0.122999	0.253754	0.085255	0.339883	0.21489	0.207286	0.13407	0.0940205	0.0736939	0.204568	0.294417	0.253679	0.388146	0.154277	0.195457	0.340977	0.311571	0.143707	0.137587	0.0412686	0.0917193	0.29615	0.36728	0.316928	0.211023	0.127056	0.194848	0.114486	0.0485319	0.0562004	0.0468861	0.214937	0.291698	0.32172
0	0.105806	0.0661363	0.027006	0.435884	0.294714	0.102863	0.271515	0.238462	0.150454	0.048473	0.447704	0.194038	0.318836	0.29866	0.327874	0.260819	0.167507	0.349368	0.075668	0.262107	0.309579	0.312242	0.192884	0.395657	0.253835	0.331384	0.286013	0.313672	0.372001	0.325779	0.2112	0.329287	0.218332	0.196917	0.154336	0.226619	0.0990632	0.0575275	0.140462	0.304292	0.349114	0.346602	0.141776	0.383973	0.227014	0.259221	0.293089	0.313594	0.299003
0	0.141217	0.00357769	0.00613232	0.104725	0.0389612	0.00393093	0.0697156	0.0136641	0.0287899	0.00110922	0.0510509	0.258696	0.0434372	0.00177631	0.0707292	0.108304	0.0182227	0.611333	0.00757576	0.0334414	0.055352	0.428493	0.260764	0.000545748	0.206867	0.020098	0.0188207	0.0448379	0.000816645	0.0110077	0.0116165	0.018102	0.0430486	0.008893	0.0357077	0.502589	0.065956	0.0049172	0.118567	0.225152	0.00697886	0.0358085	0.00017405	0.0118769	0.202853	0.0133183	5.51754e-05	0.0821525	0.00600519
0	0.103473	0.0636939	0.0270436	0.425534	0.287083	0.123608	0.266943	0.237773	0.150565	0.0482653	0.447045	0.193173	0.315443	0.298927	0.331943	0.258533	0.167457	0.349032	0.0799213	0.261432	0.311588	0.304559	0.190981	0.390605	0.257041	0.336371	0.278011	0.313042	0.361531	0.32199	0.211123	0.345334	0.218124	0.197454	0.155108	0.224231	0.101791	0.0592731	0.141759	0.300212	0.357421	0.347166	0.152625	0.393153	0.22549	0.258777	0.279885	0.310958	0.30521
0	0.291936	0.189457	0.0542305	0.9139	0.873153	0.249175	0.607571	0.579792	0.133707	0.103344	0.72505	0.3744	0.750956	0.608608	0.759652	0.561148	0.523693	0.510923	0.313042	0.733	0.842872	0.497211	0.28816	0.536158	0.521907	0.816827	0.941827	0.862391	0.398853	0.710558	0.787146	0.736784	0.766649	0.492537	0.365118	0.399941	0.220663	0.319008	0.551571	0.716155	0.635724	0.762333	0.187221	0.183033	0.183982	0.344481	0.947688	0.601466	0.552897
0	0.155097	0.0312368	0.0206195	0.196397	0.207115	0.0954815	0.125304	0.165678	0.0417489	0.0318014	0.203758	0.121654	0.24314	0.22443	0.262377	0.167489	0.305206	0.129064	0.381695	0.244605	0.22109	0.171721	0.0917814	0.132133	0.204958	0.303569	0.215204	0.345539	0.184695	0.245591	0.307678	0.376329	0.141781	0.177805	0.0616244	0.110584	0.56236	0.577185	0.576923	0.31948	0.223206	0.218766	0.16776	0.118428	0.0857388	0.0830936	0.233033	0.35537	0.416651
0	0.133959	0.0232579	0.0256056	0.186791	0.214309	0.100952	0.160617	0.136432	0.0303038	0.0407665	0.164538	0.0989461	0.221075	0.218271	0.191648	0.110649	0.268899	0.0812516	0.338023	0.189671	0.212818	0.141974	0.063643	0.0889431	0.154379	0.243573	0.24879	0.387186	0.196915	0.173498	0.361056	0.583331	0.104793	0.129248	0.0422963	0.0899716	0.568994	0.606175	0.466716	0.211396	0.121917	0.184738	0.0917421	0.0322741	0.0498278	0.0473159	0.189292	0.3044	0.431653
0	0.160266	0.119007	0.0612336	0.59584	0.472165	0.195519	0.372784	0.523407	0.0783269	0.114321	0.705223	0.463944	0.557886	0.321901	0.630337	0.628799	0.304962	0.613395	0.181902	0.521738	0.525219	0.670389	0.251128	0.386235	0.499112	0.707022	0.390499	0.440016	0.38166	0.474484	0.284372	0.577932	0.844003	0.483783	0.397021	0.533835	0.228783	0.136794	0.279835	0.451978	0.608924	0.4983	0.208728	0.245784	0.372157	0.486389	0.401742	0.609779	0.337813
0	0.233249	0.108666	0.0363395	0.405581	0.464768	0.182652	0.420154	0.412225	0.160703	0.0569274	0.460766	0.319291	0.414328	0.212588	0.609598	0.427767	0.305151	0.359418	0.14212	0.302705	0.371219	0.507794	0.166985	0.248372	0.410991	0.587972	0.427851	0.341791	0.388785	0.243897	0.300601	0.371093	0.454965	0.378566	0.207685	0.293533	0.235461	0.164331	0.316893	0.404766	0.375393	0.29917	0.132754	0.0932709	0.179003	0.303125	0.226428	0.484611	0.366138
0	0.197063	0.104048	0.0382647	0.642377	0.56956	0.260097	0.854811	0.653935	0.401747	0.0581489	0.958287	0.454118	0.456942	0.486441	0.984468	0.484471	0.479156	0.674912	0.248755	0.625177	0.708948	0.99214	0.343447	0.700461	0.518454	0.876341	0.2953	0.534338	0.388552	0.657791	0.526065	0.694771	0.560606	0.870612	0.476452	0.475027	0.623919	0.383365	0.61439	0.66166	0.759997	0.67148	0.435104	0.183291	0.389225	0.67805	0.746038	0.954178	0.62052
0	0.0928713	0.0298318	0.0225602	0.264026	0.202328	0.342219	0.27334	0.205101	0.173271	0.037988	0.480765	0.16749	0.293324	0.4263	0.399003	0.227293	0.176709	0.368955	0.151193	0.263911	0.373095	0.242805	0.124598	0.237331	0.276684	0.343702	0.162466	0.295723	0.191029	0.258103	0.231035	0.371114	0.197668	0.302552	0.179716	0.200498	0.172739	0.121515	0.220471	0.304586	0.398596	0.369117	0.252725	0.249256	0.158332	0.292081	0.372996	0.329068	0.389682
0	0.146945	0.0723166	0.027097	0.562567	0.339569	0.131536	0.437493	0.165709	0.0253943	0.052114	0.321655	0.180325	0.317101	0.31647	0.30952	0.221751	0.176264	0.426943	0.139045	0.337036	0.370666	0.315167	0.19117	0.387002	0.209294	0.320899	0.334461	0.421673	0.403029	0.447178	0.283197	0.311049	0.20571	0.245943	0.13978	0.210252	0.09583	0.0733441	0.149499	0.245347	0.372544	0.335276	0.120166	0.389426	0.15736	0.174475	0.479933	0.224083	0.298795
0	0.0912277	0.0202149	0.0264899	0.0968638	0.204738	0.077294	0.0991219	0.18732	0.111073	0.0396371	0.0719578	0.11192	0.344106	0.372955	0.149372	0.166218	0.29969	0.0570554	0.609524	0.194728	0.17128	0.139087	0.0590177	0.0573712	0.138672	0.201206	0.37457	0.277699	0.112598	0.122553	0.465688	0.435074	0.118717	0.187605	0.0145705	0.0639292	0.349638	0.369179	0.331526	0.305716	0.0882401	0.116074	0.0494952	0.0286096	0.0264124	0.0350198	0.200132	0.357894	0.160201
0	0.152526	0.0752753	0.0298952	0.56228	0.337299	0.144259	0.426706	0.18913	0.039133	0.0553642	0.324895	0.19758	0.339432	0.304391	0.316013	0.263335	0.177876	0.426956	0.141281	0.335667	0.367587	0.329293	0.189792	0.37747	0.232686	0.336763	0.35941	0.419473	0.403746	0.436181	0.275321	0.305306	0.219832	0.257496	0.141667	0.211247	0.0999182	0.0740689	0.149702	0.236867	0.380973	0.334383	0.132166	0.374174	0.16667	0.18227	0.45889	0.225063	0.315508
0	0.0980039	0.031799	0.0314994	0.161714	0.229466	0.113201	0.1559	0.204177	0.0883337	0.0542777	0.130584	0.137403	0.357748	0.557295	0.206499	0.170827	0.286701	0.0903995	0.482745	0.294976	0.27162	0.170735	0.073069	0.107717	0.197473	0.21019	0.300883	0.548696	0.148077	0.217958	0.507748	0.427592	0.188566	0.248168	0.0355285	0.0845129	0.354147	0.411565	0.433596	0.294909	0.142058	0.171951	0.0813091	0.0294832	0.0558099	0.0623006	0.398118	0.355144	0.190318
0	0.274276	0.100186	0.0521679	0.712099	0.952068	0.307392	0.978917	0.706703	0.0847188	0.074083	0.982552	0.663142	0.505469	0.541341	0.770239	0.834149	0.623009	0.680318	0.29999	0.719206	0.911056	0.349518	0.296104	0.858914	0.489587	0.979574	0.35999	0.457177	0.467729	0.701054	0.529457	0.822892	0.451947	0.664713	0.53223	0.414819	0.719434	0.362737	0.651304	0.698752	0.743662	0.841921	0.130216	0.203496	0.378276	0.162326	0.645627	0.769602	0.587831
0	0.0775292	0.0210479	0.0263061	0.105916	0.193853	0.0723809	0.09983	0.187185	0.114843	0.03853	0.072327	0.120936	0.34947	0.387709	0.139382	0.174575	0.298656	0.0578436	0.614977	0.212927	0.185505	0.14308	0.0586246	0.0609319	0.143478	0.180678	0.397731	0.306165	0.120256	0.13767	0.45984	0.449182	0.118083	0.189561	0.0136204	0.0631321	0.345221	0.33417	0.314261	0.311399	0.0961085	0.123499	0.052067	0.0233458	0.0272087	0.0387303	0.213185	0.356574	0.132188
0	0.179207	0.0424334	0.0323246	0.383249	0.411311	0.130097	0.280771	0.208745	0.101271	0.0611076	0.254064	0.177993	0.333289	0.275805	0.288876	0.225298	0.394686	0.14175	0.327756	0.30638	0.308597	0.334547	0.126404	0.182167	0.189399	0.387865	0.36993	0.413986	0.27361	0.229383	0.377612	0.445598	0.300866	0.242798	0.0995981	0.182626	0.628546	0.620026	0.717411	0.422984	0.219157	0.253888	0.110116	0.0591243	0.0831927	0.103717	0.326639	0.503583	0.361739
0	0.167563	0.0994677	0.0406436	0.349711	0.527214	0.23548	0.499885	0.424644	0.127438	0.0555486	0.798744	0.391617	0.450857	0.517561	0.754326	0.543082	0.370667	0.713903	0.452772	0.639842	0.944498	0.509329	0.120914	0.212252	0.371126	0.463134	0.380354	0.505753	0.414619	0.650165	0.438766	0.567224	0.256464	0.971226	0.189199	0.27564	0.268406	0.14458	0.361785	0.747095	0.780891	0.763348	0.391776	0.176979	0.301564	0.614694	0.961245	0.765094	0.319684
0	0.0607598	0.000296999	0.00234842	0.031402	0.0519754	0.000849205	0.113921	0.000179929	0.000540589	0.000296252	0.00909516	0.19589	0.00715635	0.000496038	0.0428475	0.0529285	0.00156991	0.187169	0.00185643	0.00494598	0.00530833	0.335248	0.0629087	0.00125389	0.0262532	0.00671167	0.0252788	0.0125838	0.0020151	0.00219441	0.00114928	0.00775087	0.00217663	0.00328071	0.00177656	0.170768	0.0345775	0.000768073	0.0522519	0.294095	0.00148536	0.00871036	8.29217e-05	0.00573973	0.215618	0.00518396	0.0001547	0.150221	0.00618271
0	0.256542	0.136099	0.084982	0.866878	0.720558	0.222795	0.659849	0.616379	0.163431	0.178443	0.591367	0.537934	0.946938	0.578357	0.865528	0.649704	0.671129	0.594142	0.471586	0.879342	0.878987	0.658271	0.349394	0.682736	0.642431	0.802534	0.775013	0.826804	0.867278	0.826227	0.778757	0.815112	0.825188	0.576478	0.319276	0.471081	0.456206	0.408387	0.770938	0.941962	0.614324	0.69833	0.15625	0.26746	0.263002	0.362923	0.790602	0.840085	0.405168
0	0.132925	0.0554093	0.0223154	0.36786	0.372722	0.122307	0.301692	0.203784	0.0812847	0.039457	0.410482	0.198492	0.225485	0.267576	0.288789	0.213323	0.149613	0.332451	0.0619765	0.193034	0.288169	0.348553	0.151095	0.435673	0.213246	0.256873	0.231084	0.240255	0.31072	0.215655	0.181967	0.258726	0.157729	0.219089	0.123816	0.227274	0.114881	0.0584821	0.138642	0.310922	0.289256	0.312142	0.0885567	0.279568	0.181713	0.230438	0.21452	0.252251	0.229045
0	0.10878	0.0253217	0.017627	0.260782	0.273618	0.0965277	0.127242	0.198986	0.072798	0.0269201	0.106462	0.119975	0.312875	0.483376	0.176843	0.190123	0.319168	0.0799512	0.486166	0.316794	0.255564	0.223491	0.11829	0.0849378	0.121748	0.176051	0.304186	0.552763	0.112329	0.249553	0.623681	0.565643	0.115749	0.206784	0.0170318	0.081125	0.455178	0.613356	0.446646	0.288586	0.0942358	0.227018	0.041845	0.0199861	0.0247085	0.0558009	0.23448	0.342397	0.169866
0	0.264293	0.217114	0.037826	0.867748	0.652716	0.281888	0.571018	0.511409	0.171386	0.0588405	0.674002	0.398647	0.77123	0.425183	0.663552	0.607127	0.392519	0.590296	0.217461	0.645272	0.61026	0.725819	0.351564	0.531536	0.531057	0.723093	0.661622	0.719599	0.588966	0.576951	0.473182	0.642635	0.434078	0.492653	0.350168	0.466661	0.320904	0.25974	0.462354	0.592255	0.56953	0.542516	0.218394	0.199773	0.29951	0.363321	0.543715	0.569999	0.517851
0	0.14594	0.01912	0.0433964	0.247715	0.212527	0.141174	0.107754	0.276685	0.447765	0.0616181	0.161882	0.151941	0.364141	0.404898	0.384993	0.168539	0.456797	0.185497	0.806462	0.415312	0.358102	0.210018	0.172741	0.114863	0.210286	0.418883	0.230857	0.573691	0.123218	0.30509	0.569581	0.76428	0.217283	0.249658	0.0493268	0.101144	0.567558	0.679564	0.558238	0.284084	0.155882	0.301567	0.100411	0.0811054	0.0519854	0.117714	0.241771	0.656257	0.366963
0	0.224429	0.137142	0.0556207	0.712354	0.803023	0.27157	0.642714	0.411326	0.108399	0.0903652	0.625462	0.404867	0.801129	0.707562	0.663219	0.672072	0.448297	0.579009	0.481722	0.928043	0.856811	0.531281	0.307718	0.52851	0.431602	0.628737	0.759102	0.792946	0.678668	0.942243	0.646202	0.985122	0.446789	0.602877	0.213038	0.301984	0.440861	0.456533	0.629782	0.670384	0.820795	0.809399	0.339341	0.248444	0.287478	0.350269	0.84169	0.583522	0.612865
0	0.199881	0.117249	0.0718361	0.785746	0.725235	0.294776	0.670639	0.780944	0.24147	0.135694	0.752378	0.426218	0.809719	0.570711	0.856123	0.726235	0.50144	0.662197	0.354538	0.72608	0.874648	0.616273	0.305173	0.437566	0.658117	0.742173	0.814791	0.83306	0.762242	0.585465	0.682342	0.66477	0.821255	0.720549	0.345562	0.454311	0.232554	0.251166	0.521209	0.901911	0.689744	0.75106	0.191632	0.286346	0.177213	0.468712	0.864985	0.890244	0.388967
0	0.0841686	0.00055453	0.00284309	0.111258	0.0804281	0.000819082	0.130669	0.00129565	0.000672047	0.000378216	0.0112437	0.321138	0.020549	0.000439782	0.0685116	0.0929533	0.00147741	0.341416	0.00175988	0.0177039	0.0135285	0.640236	0.076383	0.000882295	0.0403187	0.00970519	0.0450861	0.0359569	0.00367702	0.00640527	0.00694938	0.0130245	0.0206239	0.00654695	0.00295803	0.262677	0.0193988	0.000211592	0.0335145	0.209988	0.0022989	0.00753539	2.70964e-05	0.00473859	0.159464	0.006651	1.53407e-05	0.13534	0.00570706
0	0.323441	0.0661114	0.0783304	0.958535	0.426934	0.243104	0.719771	0.616576	0.17328	0.14458	0.690145	0.599316	0.982584	0.60361	0.726174	0.780133	0.663964	0.579693	0.368674	0.825681	0.905386	0.795129	0.334543	0.785533	0.650149	0.826723	0.440942	0.798259	0.967847	0.905071	0.740952	0.823948	0.71159	0.565824	0.312878	0.461838	0.476025	0.387607	0.776896	0.98594	0.683976	0.802692	0.166375	0.162878	0.312392	0.370938	0.85693	0.850098	0.565686
0	0.156512	0.0343506	0.0198195	0.364569	0.302983	0.0942022	0.158192	0.233408	0.0690763	0.0356666	0.145283	0.137619	0.353873	0.27604	0.252793	0.188407	0.350076	0.187258	0.592558	0.450137	0.362516	0.23451	0.112869	0.121624	0.199158	0.333485	0.411807	0.491436	0.22055	0.269837	0.503224	0.56085	0.173045	0.215543	0.0484043	0.106803	0.418671	0.543392	0.467734	0.316036	0.141762	0.285535	0.0673654	0.0544967	0.0361895	0.089439	0.26367	0.465915	0.231153
0	0.143078	0.0735574	0.0274179	0.511175	0.374073	0.129678	0.42217	0.183332	0.0306282	0.0521973	0.346295	0.179561	0.327474	0.338736	0.364107	0.239085	0.194985	0.411733	0.151081	0.347708	0.374871	0.290922	0.179071	0.367752	0.236733	0.354235	0.336178	0.440338	0.430524	0.425361	0.31119	0.357452	0.260808	0.255913	0.161626	0.237921	0.097415	0.082573	0.169385	0.307509	0.381087	0.322518	0.122894	0.34824	0.15357	0.182919	0.506058	0.262291	0.298031
0	0.17296	0.0284323	0.0369665	0.311051	0.322738	0.129206	0.281712	0.178546	0.118685	0.0681679	0.235692	0.156903	0.323854	0.261138	0.256119	0.235765	0.355563	0.118515	0.290117	0.288884	0.269223	0.276097	0.134363	0.158544	0.192073	0.392059	0.334699	0.456141	0.21009	0.230411	0.330589	0.412566	0.272729	0.245205	0.0762761	0.160094	0.517241	0.5354	0.579626	0.321864	0.2263	0.23553	0.123198	0.0573847	0.0881796	0.0869641	0.300836	0.428743	0.341205
0	0.176792	0.0379918	0.057481	0.461712	0.457896	0.110341	0.256276	0.17283	0.0282113	0.0984127	0.215953	0.199453	0.347928	0.375786	0.268662	0.284156	0.31139	0.208842	0.444973	0.456024	0.425355	0.258303	0.200477	0.280696	0.195053	0.34576	0.483829	0.670705	0.292925	0.466521	0.566658	0.8977	0.319087	0.178238	0.0826678	0.169231	0.49024	0.438064	0.475706	0.404136	0.255203	0.347471	0.111326	0.0834957	0.124725	0.102976	0.441266	0.303349	0.307299
0	0.252453	0.226085	0.0545245	0.880574	0.751163	0.269792	0.645909	0.533148	0.174377	0.102738	0.658723	0.430578	0.758916	0.477083	0.748154	0.591799	0.442081	0.600259	0.298673	0.725456	0.692988	0.732243	0.332122	0.584158	0.532046	0.703571	0.72732	0.720367	0.678825	0.616925	0.555705	0.632129	0.62562	0.523363	0.330003	0.435432	0.35904	0.298995	0.532266	0.645433	0.56213	0.55633	0.204639	0.199571	0.290345	0.3821	0.626843	0.650115	0.448014
0	0.277717	0.101141	0.0660966	0.72708	0.920047	0.296846	0.926496	0.669712	0.0866829	0.0711601	0.942662	0.629666	0.520587	0.516748	0.76661	0.775277	0.591448	0.661904	0.283437	0.681144	0.860575	0.380337	0.30317	0.833784	0.507583	0.96029	0.400861	0.498402	0.512618	0.673157	0.520951	0.790953	0.494398	0.623592	0.502282	0.433715	0.648289	0.335905	0.614769	0.678733	0.730779	0.784812	0.145446	0.231474	0.360241	0.190267	0.600802	0.72276	0.57683
0	0.142087	0.0302031	0.0221034	0.183661	0.167722	0.0679017	0.0999623	0.171886	0.041881	0.036797	0.143973	0.116561	0.312701	0.25691	0.191898	0.119658	0.25332	0.0864246	0.345404	0.219384	0.217086	0.142176	0.0882629	0.0717064	0.206804	0.266574	0.279548	0.36519	0.158226	0.194749	0.343282	0.321653	0.130223	0.147188	0.0357621	0.08614	0.284396	0.332509	0.304372	0.222169	0.119611	0.199156	0.0940968	0.043904	0.0543887	0.0455069	0.206032	0.298856	0.297194
0	0.157233	0.0324531	0.0210793	0.206633	0.230182	0.106716	0.140104	0.166425	0.047661	0.0310037	0.227749	0.128077	0.224556	0.216702	0.291684	0.190555	0.328138	0.146338	0.39497	0.256069	0.229335	0.193555	0.0949649	0.155817	0.201888	0.31537	0.197922	0.333469	0.19566	0.267762	0.297097	0.40648	0.147586	0.194909	0.0713035	0.121118	0.681604	0.665937	0.685031	0.366585	0.261361	0.231124	0.191812	0.143822	0.0971473	0.0986968	0.243254	0.391544	0.46026
0	0.243245	0.0927697	0.0638634	0.452829	0.480336	0.360255	0.453215	0.531409	0.300592	0.0940576	0.708822	0.451671	0.67118	0.493093	0.73555	0.637242	0.374549	0.746915	0.389794	0.629916	0.932786	0.575747	0.201953	0.241824	0.579503	0.568833	0.476308	0.500255	0.407606	0.504545	0.401731	0.547427	0.371038	0.947627	0.192622	0.298436	0.291966	0.15959	0.374118	0.654457	0.702711	0.686036	0.35176	0.182929	0.288628	0.501999	0.64241	0.744364	0.393802
0	0.2664	0.231325	0.0396178	0.923569	0.685166	0.285772	0.689923	0.488363	0.168725	0.0598138	0.731362	0.411176	0.671327	0.478473	0.661233	0.598775	0.348819	0.647231	0.204438	0.651872	0.665956	0.810468	0.324047	0.521461	0.488711	0.653882	0.609665	0.67112	0.644563	0.604117	0.471969	0.575867	0.497619	0.502032	0.327108	0.417011	0.322506	0.239535	0.435518	0.573442	0.578493	0.582834	0.23139	0.155422	0.31332	0.398529	0.626885	0.570538	0.513835
0	0.0589535	0.0255639	0.0305095	0.285207	0.241624	0.111061	0.162024	0.196401	0.174769	0.0568942	0.292899	0.121802	0.28222	0.252398	0.348301	0.271247	0.151178	0.315154	0.121983	0.323059	0.201301	0.11576	0.17471	0.157699	0.289853	0.296329	0.168413	0.364109	0.318817	0.244267	0.20948	0.372516	0.401753	0.229463	0.168999	0.221913	0.0411754	0.0507698	0.102173	0.314868	0.398145	0.188985	0.124777	0.22836	0.129695	0.246125	0.223265	0.333626	0.215182
0	0.206879	0.102126	0.0575833	0.343624	0.542412	0.248559	0.558872	0.361667	0.11901	0.0984807	0.857169	0.340793	0.4761	0.453032	0.560122	0.483091	0.343311	0.359198	0.188402	0.456587	0.615334	0.504385	0.165864	0.257686	0.323479	0.5353	0.319723	0.427934	0.366587	0.407446	0.322606	0.434254	0.546862	0.516617	0.334564	0.424694	0.326159	0.219905	0.466208	0.682403	0.614645	0.548315	0.325984	0.257659	0.280947	0.38206	0.644625	0.587402	0.463571
0	0.0412934	0.000329036	0.000840704	0.0350279	0.0680921	0.0012714	0.132423	0.000193852	0.000526602	8.11416e-05	0.00863295	0.235465	0.00623622	0.000467059	0.0444514	0.0496031	0.00145729	0.251919	0.00226655	0.0103047	0.00374218	0.447006	0.0412935	0.00120672	0.0234522	0.00250846	0.0307093	0.019574	0.00256023	0.00352928	0.00181112	0.00547638	0.00254458	0.00372325	0.00115482	0.180711	0.0305138	0.00104356	0.068116	0.398216	0.000703405	0.00246784	5.05576e-05	0.00137812	0.110502	0.0061817	0.000223865	0.180847	0.00127381
0	0.0856241	0.000378331	0.00407097	0.0381914	0.0442857	0.00175417	0.103324	0.000363595	0.000622653	0.000503601	0.0133205	0.228651	0.0118334	0.000975479	0.0496456	0.0661888	0.00307895	0.183421	0.00190682	0.00581711	0.00993746	0.321802	0.101454	0.0017689	0.0361878	0.0116769	0.0261534	0.01584	0.00211805	0.00489965	0.00255122	0.0125577	0.00447815	0.00482398	0.00322636	0.178705	0.0394512	0.000693766	0.0429367	0.210764	0.00264341	0.0148396	0.000137726	0.00967956	0.296928	0.00501142	7.67816e-05	0.127021	0.0103425
0	0.193591	0.102292	0.0540937	0.477609	0.373287	0.248997	0.310885	0.415676	0.163979	0.0830026	0.3919	0.342537	0.545087	0.237761	0.458258	0.643337	0.22145	0.402979	0.179493	0.341225	0.348345	0.410242	0.158754	0.265919	0.474585	0.524362	0.573318	0.430511	0.45367	0.308129	0.253257	0.330795	0.427395	0.371366	0.192588	0.263901	0.1371	0.0949475	0.183175	0.264366	0.465999	0.306546	0.238233	0.179206	0.239498	0.262013	0.322508	0.294455	0.455754
0	0.174115	0.0421516	0.0345566	0.183107	0.276218	0.128454	0.169963	0.233778	0.0919806	0.0628684	0.187489	0.140794	0.322043	0.281366	0.305439	0.180624	0.354728	0.109212	0.399797	0.260639	0.273193	0.236165	0.0823321	0.0957478	0.197649	0.344827	0.257017	0.334716	0.174865	0.231097	0.380203	0.4095	0.211679	0.280941	0.0662784	0.125809	0.54011	0.530247	0.62656	0.39553	0.166606	0.25665	0.126657	0.0702372	0.0586402	0.0866332	0.320628	0.51864	0.430864
0	0.256721	0.124691	0.0738992	0.579825	0.848601	0.25762	0.560034	0.585053	0.255766	0.117019	0.64452	0.413204	0.713526	0.45198	0.782022	0.604387	0.492134	0.50291	0.294783	0.592504	0.725641	0.532511	0.225706	0.319296	0.598446	0.837811	0.647673	0.574339	0.593407	0.444538	0.50365	0.673683	0.535277	0.735227	0.281403	0.34795	0.285825	0.240078	0.455666	0.6669	0.526649	0.555021	0.213007	0.174789	0.190942	0.420521	0.519271	0.800588	0.628352
0	0.133633	0.0409071	0.0261827	0.326498	0.357628	0.105026	0.247473	0.19003	0.0609249	0.0392481	0.279134	0.201122	0.285448	0.256924	0.335513	0.221091	0.403333	0.172132	0.460869	0.299862	0.376307	0.353394	0.0861883	0.153677	0.182915	0.341649	0.293524	0.281233	0.24355	0.252916	0.344453	0.466497	0.196179	0.273541	0.0804089	0.140072	0.895445	0.617978	0.734663	0.452063	0.206781	0.318648	0.123456	0.0623626	0.0813471	0.121659	0.250307	0.601662	0.410154
0	0.091521	0.0211971	0.0294128	0.216334	0.187803	0.199669	0.162285	0.203369	0.221489	0.0575548	0.354049	0.126529	0.285434	0.231569	0.311113	0.257187	0.131061	0.231862	0.0700235	0.189322	0.223487	0.163058	0.129829	0.101485	0.260045	0.302523	0.134719	0.264901	0.167783	0.153996	0.151158	0.214028	0.276127	0.251603	0.129799	0.198253	0.0698267	0.0447794	0.107884	0.213732	0.293304	0.210825	0.123772	0.152511	0.154905	0.197727	0.165538	0.322104	0.218538
0	0.13075	0.0270039	0.0421835	0.170891	0.232433	0.151648	0.155976	0.238514	0.125316	0.0816762	0.17462	0.140162	0.345847	0.318424	0.283877	0.158351	0.336332	0.0921506	0.38805	0.252659	0.290079	0.247697	0.0764037	0.0707135	0.190097	0.326767	0.205454	0.30212	0.131166	0.232324	0.369028	0.401082	0.254623	0.327125	0.0779884	0.130405	0.584823	0.513442	0.637714	0.412948	0.160691	0.278656	0.155184	0.105673	0.0503702	0.088764	0.341221	0.563493	0.464172
0	0.327352	0.0770454	0.0912233	0.942098	0.454866	0.249218	0.697347	0.563031	0.158794	0.10797	0.713646	0.55169	0.877356	0.537077	0.693924	0.703251	0.568783	0.570179	0.285852	0.706777	0.799201	0.773955	0.333211	0.761921	0.630184	0.819989	0.435997	0.77106	0.918276	0.793445	0.641693	0.745927	0.680629	0.50953	0.313151	0.477336	0.400662	0.318009	0.653974	0.851701	0.67938	0.710436	0.192028	0.196062	0.307754	0.373888	0.718482	0.726979	0.581643
0	0.166716	0.0246164	0.0334996	0.282825	0.211114	0.127303	0.117086	0.259827	0.239563	0.0628942	0.14379	0.138062	0.391009	0.268018	0.310388	0.178739	0.363806	0.160269	0.585133	0.333964	0.276904	0.176243	0.150212	0.115831	0.220274	0.443651	0.307058	0.488111	0.167005	0.267581	0.443179	0.518004	0.22415	0.194663	0.0575426	0.110854	0.437877	0.610636	0.465509	0.197179	0.136083	0.265797	0.090025	0.0711493	0.0697422	0.0885423	0.215097	0.419956	0.443477
0	0.115078	0.0166687	0.0517613	0.18701	0.178155	0.132321	0.110052	0.171074	0.361938	0.0666876	0.142951	0.152706	0.351035	0.559746	0.315784	0.178366	0.451616	0.118215	0.759671	0.448089	0.382928	0.196834	0.159666	0.0855568	0.173055	0.296639	0.219723	0.538193	0.0922203	0.309379	0.626124	0.820953	0.190188	0.224629	0.0365455	0.0901094	0.567017	0.59091	0.518388	0.358957	0.156139	0.28179	0.108452	0.0623764	0.0334392	0.0828627	0.268893	0.678393	0.270191
0	0.228956	0.13511	0.0591041	0.638943	0.527377	0.193677	0.526692	0.410833	0.116029	0.0904366	0.758513	0.368611	0.750398	0.757134	0.799907	0.603611	0.397144	0.66646	0.481078	0.691533	0.789276	0.54036	0.27686	0.476215	0.504096	0.677339	0.494315	0.70448	0.457583	0.579801	0.548695	0.647571	0.441911	0.659311	0.255372	0.334804	0.474094	0.365803	0.569016	0.67492	0.824191	0.629176	0.496551	0.395162	0.351959	0.38676	0.77904	0.678657	0.77515
0	0.187461	0.0212641	0.0286438	0.25815	0.214851	0.159702	0.135865	0.128472	0.0787415	0.0397048	0.264699	0.0965652	0.266704	0.22842	0.237206	0.175338	0.261834	0.130164	0.356601	0.20969	0.200902	0.171156	0.098963	0.0628966	0.17753	0.341803	0.153731	0.34052	0.116402	0.158623	0.243665	0.456647	0.168123	0.246299	0.0552124	0.119285	0.414021	0.519132	0.40877	0.15921	0.189354	0.202064	0.136505	0.0423438	0.112171	0.0719802	0.14545	0.290163	0.730325
0	0.265875	0.120466	0.072301	0.545143	0.830896	0.284988	0.574033	0.506451	0.199464	0.122279	0.698724	0.335138	0.695757	0.502912	0.750037	0.51854	0.481594	0.394218	0.284662	0.56962	0.640332	0.449597	0.208366	0.254548	0.521017	0.815725	0.533865	0.595562	0.557715	0.45002	0.510625	0.557474	0.565828	0.664329	0.302896	0.353536	0.236648	0.259455	0.458811	0.624193	0.50671	0.517213	0.240985	0.203141	0.185826	0.387688	0.633901	0.776716	0.671114
0	0.164602	0.0238109	0.0338761	0.295059	0.257482	0.136748	0.116416	0.359991	0.438355	0.0545929	0.17111	0.153428	0.375255	0.282664	0.417232	0.163428	0.445887	0.230174	0.798766	0.367916	0.335272	0.228036	0.165271	0.140429	0.23698	0.488125	0.276191	0.599738	0.159201	0.294496	0.527324	0.679628	0.229613	0.26928	0.0566662	0.110382	0.566668	0.722419	0.586829	0.236417	0.151533	0.318541	0.0829799	0.0844457	0.0673292	0.136722	0.230085	0.581965	0.410028
0	0.212178	0.0343171	0.076126	0.101385	0.120794	0.0677084	0.0946788	0.12454	0.0716225	0.0832022	0.114558	0.0940492	0.268283	0.196369	0.12349	0.144903	0.294853	0.0497465	0.189122	0.227569	0.198664	0.117243	0.0922091	0.0414579	0.182037	0.240231	0.134867	0.240573	0.0525499	0.185307	0.236498	0.289823	0.123794	0.3556	0.0555165	0.0838444	0.283162	0.265626	0.276217	0.175892	0.115506	0.173254	0.335885	0.178066	0.0846256	0.0476124	0.126033	0.184349	0.350049
0	0.342921	0.144045	0.0648966	0.665981	0.796376	0.333089	0.632588	0.490505	0.155108	0.107249	0.68635	0.331858	0.654154	0.442025	0.758813	0.576513	0.412861	0.366947	0.196087	0.531342	0.555403	0.658672	0.246344	0.415816	0.54774	0.734664	0.507554	0.597111	0.551909	0.493831	0.488911	0.529006	0.498073	0.429033	0.300862	0.371816	0.355353	0.342022	0.517901	0.510721	0.565917	0.490708	0.308013	0.133656	0.273996	0.428844	0.592346	0.622772	0.807
0	0.182938	0.0864783	0.0294287	0.525161	0.541925	0.155951	0.430203	0.371996	0.201836	0.0510393	0.512878	0.271187	0.451511	0.454289	0.580754	0.396966	0.248078	0.753538	0.277612	0.543196	0.626477	0.436419	0.17441	0.308127	0.344936	0.429573	0.365235	0.470845	0.416147	0.447506	0.323984	0.37068	0.248245	0.548742	0.198048	0.254627	0.138947	0.103099	0.208217	0.348372	0.440463	0.489915	0.206048	0.245483	0.186975	0.405491	0.673966	0.385475	0.265469
0	0.20281	0.104001	0.0716317	0.869141	0.618024	0.287828	0.708195	0.822102	0.238264	0.137709	0.772564	0.482895	0.85798	0.592664	0.84638	0.797955	0.524524	0.720154	0.365818	0.774988	0.944969	0.701851	0.332307	0.547607	0.682931	0.720207	0.802664	0.879834	0.845502	0.673542	0.725604	0.710711	0.866872	0.703512	0.353836	0.488076	0.277701	0.268166	0.58224	0.999764	0.746608	0.830123	0.178259	0.287995	0.205142	0.474686	0.931638	0.905383	0.335748
0	0.120662	0.0250271	0.022842	0.1475	0.171248	0.0695245	0.0974606	0.17246	0.0637575	0.036622	0.116594	0.112899	0.319807	0.306418	0.169188	0.13379	0.271905	0.073317	0.463729	0.209877	0.196593	0.134035	0.0722434	0.0658462	0.182186	0.23863	0.31897	0.337786	0.14345	0.161295	0.390253	0.360295	0.122102	0.160434	0.0274175	0.0746371	0.308447	0.345921	0.31184	0.249222	0.107442	0.161264	0.0793939	0.035773	0.0426577	0.0409951	0.207608	0.31642	0.235979
0	0.184012	0.124038	0.0722309	0.641343	0.514443	0.204734	0.415233	0.511732	0.0862544	0.10373	0.703376	0.455508	0.572683	0.332313	0.646814	0.599444	0.317881	0.605154	0.182367	0.51749	0.532068	0.665994	0.267275	0.432973	0.515131	0.722762	0.436993	0.492506	0.448079	0.480878	0.31616	0.578176	0.818021	0.469256	0.38317	0.531368	0.229256	0.145942	0.300724	0.468726	0.610879	0.48956	0.213062	0.26171	0.353536	0.466592	0.398701	0.584596	0.367928
0	0.196026	0.0715123	0.0385032	0.473706	0.515787	0.261196	0.560024	0.507829	0.212652	0.0587616	0.715706	0.375686	0.48288	0.512737	0.794157	0.496964	0.38113	0.598879	0.317793	0.591285	0.771408	0.610827	0.210962	0.415126	0.417799	0.5757	0.364554	0.616216	0.400776	0.523663	0.491523	0.534949	0.398816	0.763365	0.270227	0.339365	0.307004	0.1986	0.404813	0.583107	0.721931	0.619317	0.339387	0.171228	0.269703	0.503521	0.799822	0.743166	0.422969
0	0.151874	0.0559444	0.0210253	0.413947	0.458487	0.097755	0.231215	0.282687	0.0525743	0.038313	0.211836	0.231335	0.376475	0.308675	0.292391	0.285553	0.417269	0.169089	0.553676	0.38176	0.386063	0.348206	0.104005	0.217145	0.235584	0.335499	0.502859	0.437723	0.383168	0.268239	0.43645	0.452677	0.239895	0.244862	0.094194	0.143003	0.747273	0.636763	0.778779	0.46165	0.246618	0.29148	0.0975405	0.0409273	0.0844209	0.128477	0.370021	0.55156	0.291351
0	0.203064	0.067395	0.0654481	0.464785	0.445816	0.154386	0.450197	0.376073	0.0885093	0.100228	0.757653	0.34912	0.737968	0.874489	0.858484	0.586234	0.417179	0.683944	0.600049	0.696646	0.874568	0.398965	0.236118	0.402152	0.492439	0.647165	0.4181	0.713624	0.365671	0.578276	0.587329	0.665091	0.393202	0.751253	0.207115	0.286603	0.50213	0.386145	0.597875	0.727611	0.9361	0.676777	0.596929	0.482821	0.348436	0.393294	0.887697	0.731244	0.833623
0	0.148567	0.100271	0.0531069	0.781462	0.404486	0.335025	0.510098	0.514094	0.337287	0.105332	0.728849	0.365884	0.690389	0.574248	0.758983	0.637782	0.255409	0.745066	0.203117	0.550009	0.594781	0.531322	0.265828	0.31326	0.632596	0.7439	0.400713	0.541851	0.513513	0.534433	0.348186	0.460791	0.731594	0.511207	0.291219	0.360947	0.158853	0.125535	0.227357	0.412835	0.886743	0.554764	0.580503	0.0943076	0.41183	0.709523	0.701335	0.482644	0.662835
0	0.0598927	0.0169601	0.0221688	0.218274	0.163995	0.436938	0.209966	0.223601	0.188374	0.0387984	0.449409	0.17159	0.251688	0.299726	0.374953	0.229703	0.16638	0.374914	0.180824	0.291137	0.365185	0.193177	0.107105	0.179021	0.28845	0.356806	0.142772	0.315766	0.167255	0.235199	0.192281	0.494853	0.2184	0.289025	0.171101	0.182407	0.173108	0.108311	0.187826	0.256336	0.474358	0.325582	0.314889	0.385658	0.151299	0.321831	0.203208	0.31982	0.329059
0	0.0746343	0.00148912	0.00128554	0.0560654	0.0911004	0.00116145	0.395197	0.00227323	0.0126059	0.000499759	0.0475203	0.373707	0.00342583	0.00084294	0.0706235	0.107263	0.00476894	0.212282	0.000246084	0.00735925	0.0319807	0.798625	0.0570556	0.00223258	0.0368426	0.0186522	0.0222504	0.0110125	0.00344992	0.00130352	0.00238697	0.00203472	0.00758088	0.00994525	0.0175394	0.236248	0.0438596	0.000440589	0.046774	0.356156	0.00710688	0.0141342	0.000968947	0.00813981	0.263161	0.0281086	0.00028008	0.189484	0.00943912
0	0.157784	0.0437781	0.0268688	0.335533	0.415216	0.117194	0.243316	0.21662	0.0412568	0.0397762	0.259984	0.209538	0.304166	0.270284	0.376987	0.216979	0.450684	0.178994	0.590716	0.308962	0.410509	0.375735	0.0883198	0.15932	0.179032	0.38291	0.347483	0.307092	0.283737	0.242488	0.418106	0.512246	0.161141	0.29133	0.0774929	0.130992	0.840022	0.591977	0.862823	0.496994	0.207335	0.310084	0.112125	0.0463015	0.065615	0.127091	0.266919	0.708064	0.451844
0	0.102403	0.0326346	0.0328065	0.250982	0.30107	0.0663539	0.148817	0.237159	0.0639944	0.0436375	0.122664	0.182476	0.347392	0.396898	0.27179	0.199821	0.425511	0.131018	0.62651	0.373188	0.406145	0.269799	0.0973231	0.111732	0.169152	0.244152	0.444416	0.528058	0.174051	0.309934	0.615288	0.69267	0.149348	0.223806	0.0287047	0.106859	0.639615	0.526359	0.534566	0.411673	0.146386	0.356587	0.0475946	0.0208237	0.0408996	0.0716434	0.236978	0.450532	0.154531
0	0.128347	0.0029693	0.00502284	0.129753	0.0585432	0.00272086	0.0904345	0.0112927	0.0227407	0.000917593	0.0412077	0.291821	0.0409972	0.00123605	0.0754654	0.112905	0.0138548	0.596328	0.0061873	0.0330315	0.0471861	0.565456	0.210627	0.000242318	0.171456	0.01722	0.0298864	0.0480914	0.00185498	0.00987973	0.0118	0.0168748	0.0433988	0.00866927	0.0284592	0.476951	0.049009	0.00369581	0.0953963	0.214556	0.00582431	0.0274396	0.000101897	0.00885499	0.153415	0.0122886	2.4005e-05	0.0942185	0.00463245
0	0.11282	0.0277424	0.0368127	0.259018	0.304566	0.0689438	0.150344	0.237875	0.063618	0.047433	0.12491	0.177328	0.36145	0.425638	0.287186	0.196222	0.466686	0.133154	0.671443	0.372518	0.415994	0.285914	0.105071	0.11128	0.163181	0.261648	0.43957	0.546771	0.160849	0.320114	0.687604	0.76915	0.14371	0.225802	0.0269302	0.107093	0.716947	0.611117	0.594522	0.423521	0.13218	0.390996	0.0370059	0.0175925	0.0365499	0.0646079	0.214423	0.473607	0.164831
0	0.162339	0.0048017	0.00689878	0.130986	0.0380867	0.00488761	0.0581257	0.0187247	0.039474	0.00133315	0.0656891	0.277634	0.0557417	0.00212056	0.0795297	0.125105	0.0240892	0.780641	0.00977655	0.0446086	0.0728137	0.480531	0.322215	0.000123884	0.272162	0.0232636	0.0167443	0.0569319	0.000395282	0.0137246	0.0152577	0.0203837	0.0579241	0.0106279	0.048083	0.627243	0.0759848	0.0065431	0.148204	0.23491	0.00863893	0.0436037	0.000189134	0.0125709	0.162586	0.0165661	4.77736e-05	0.0665291	0.00417921
0	0.0963571	0.0329653	0.0328378	0.16148	0.233224	0.108958	0.15233	0.213631	0.0869328	0.0559951	0.136122	0.151298	0.375123	0.56612	0.215102	0.183125	0.314235	0.0911724	0.518725	0.31121	0.288966	0.176378	0.0749193	0.106699	0.199433	0.215956	0.32082	0.529822	0.149594	0.231871	0.509619	0.452063	0.190193	0.244826	0.0361145	0.0849905	0.385586	0.432556	0.456389	0.307781	0.144983	0.194359	0.0819457	0.0350176	0.0540792	0.0652242	0.387271	0.399474	0.18549
0	0.112503	0.0281874	0.0380463	0.257665	0.306108	0.067101	0.151689	0.24086	0.0631435	0.048911	0.126553	0.182022	0.365526	0.422663	0.294095	0.19737	0.47568	0.136379	0.683422	0.37675	0.426514	0.288955	0.103728	0.113001	0.166698	0.266875	0.449075	0.544453	0.16459	0.324614	0.688048	0.77906	0.146371	0.227033	0.027794	0.108684	0.731119	0.60776	0.602794	0.432063	0.135549	0.400594	0.0374929	0.0180371	0.037572	0.0656216	0.214812	0.483844	0.164067
0	0.157394	0.0435697	0.0236811	0.2963	0.392312	0.101913	0.162105	0.221392	0.060221	0.0387404	0.191451	0.164301	0.355409	0.287868	0.230522	0.226892	0.385394	0.109249	0.48023	0.318675	0.313341	0.253968	0.0729979	0.132734	0.178992	0.304587	0.417433	0.383698	0.266137	0.251668	0.379329	0.447572	0.176609	0.21504	0.0550951	0.105618	0.622077	0.580822	0.577352	0.328587	0.180248	0.278315	0.0797317	0.0318405	0.0608666	0.0883082	0.297064	0.481522	0.268197
0	0.114546	0.0220766	0.0192801	0.12142	0.118855	0.0487036	0.0668263	0.124309	0.0198167	0.0330271	0.0907544	0.0809671	0.267632	0.158079	0.123733	0.114697	0.175838	0.0579108	0.239485	0.143583	0.128276	0.0926379	0.0506688	0.0469138	0.152057	0.217972	0.215828	0.242059	0.107407	0.136606	0.224891	0.216448	0.102209	0.0914345	0.0274132	0.0683001	0.188808	0.231212	0.205506	0.142769	0.0975754	0.133288	0.0829641	0.0409506	0.060448	0.0285956	0.131691	0.187215	0.261652
0	0.0897416	0.0382144	0.0264396	0.241628	0.294308	0.0656336	0.145048	0.23301	0.0652191	0.0374069	0.118441	0.183692	0.326642	0.367813	0.244212	0.203559	0.364289	0.123975	0.55764	0.369248	0.380872	0.24544	0.0892834	0.110029	0.172694	0.216194	0.43865	0.506436	0.185544	0.291903	0.52434	0.584944	0.153642	0.219829	0.0299626	0.104378	0.525932	0.426316	0.451106	0.386203	0.159964	0.301971	0.0605277	0.0248482	0.0450379	0.0792155	0.265354	0.412102	0.142778
0	0.253568	0.135024	0.0672712	0.733252	0.771263	0.335115	0.684027	0.530855	0.152099	0.117449	0.727473	0.475601	0.838134	0.696831	0.676381	0.749035	0.405806	0.631629	0.496692	0.948184	0.901964	0.579675	0.355317	0.411536	0.49816	0.700272	0.752633	0.74628	0.665093	0.924247	0.646364	0.954228	0.520065	0.697212	0.28706	0.345403	0.524585	0.504212	0.725496	0.709164	0.877305	0.812076	0.425395	0.345615	0.321759	0.490712	0.856789	0.688512	0.646876
0	0.262935	0.14871	0.0629237	0.498763	0.766628	0.298594	0.565017	0.592022	0.390089	0.0969068	0.65755	0.430361	0.757499	0.450607	0.767785	0.607223	0.449406	0.407397	0.274726	0.503235	0.589214	0.645319	0.207905	0.3358	0.613536	0.764763	0.628304	0.602287	0.522801	0.493236	0.497071	0.740893	0.454007	0.610767	0.23001	0.345469	0.319248	0.25661	0.448993	0.58548	0.60408	0.55561	0.249678	0.108803	0.255975	0.363639	0.468837	0.638749	0.619554
0	0.162505	0.026541	0.0331795	0.267586	0.192672	0.111537	0.122596	0.168504	0.0415478	0.066938	0.121843	0.129196	0.398147	0.272797	0.211676	0.19435	0.307262	0.0936198	0.404995	0.306607	0.243863	0.147409	0.126629	0.0932697	0.195445	0.377303	0.352325	0.3913	0.17586	0.249356	0.393058	0.406046	0.20675	0.135586	0.0539159	0.11006	0.369353	0.512976	0.379762	0.194663	0.123512	0.236353	0.0889714	0.0514577	0.0669381	0.0441073	0.205381	0.292134	0.429945
0	0.0803168	0.042208	0.0231804	0.221703	0.270253	0.0665939	0.134576	0.225848	0.0822882	0.0349312	0.113227	0.177185	0.328214	0.333816	0.208263	0.204099	0.292375	0.108972	0.450462	0.337214	0.32945	0.216887	0.0895995	0.0999874	0.17747	0.18901	0.416702	0.452614	0.181042	0.268602	0.418226	0.471924	0.155772	0.208007	0.0292798	0.100117	0.382212	0.301114	0.343043	0.347943	0.161464	0.243053	0.0707236	0.0310482	0.0499225	0.0779528	0.271393	0.369747	0.153265
0	0.186024	0.115931	0.0606177	0.487374	0.509467	0.213828	0.448907	0.471672	0.0970846	0.10913	0.766696	0.422723	0.533922	0.369645	0.608763	0.587038	0.321716	0.525022	0.19083	0.49671	0.568601	0.616633	0.215453	0.332411	0.435675	0.645771	0.370571	0.429726	0.382245	0.440451	0.300432	0.513438	0.736775	0.507559	0.375671	0.501365	0.270511	0.173206	0.363638	0.55495	0.596483	0.515094	0.242254	0.25476	0.341038	0.444187	0.496424	0.611087	0.383611
0	0.0904177	0.0201223	0.0258474	0.106542	0.178386	0.0722237	0.0952617	0.178912	0.10412	0.0386396	0.0816205	0.112586	0.344663	0.368005	0.14105	0.159373	0.290211	0.0569495	0.581568	0.197829	0.172953	0.133099	0.0605714	0.0579836	0.151972	0.197224	0.370973	0.298941	0.120034	0.132017	0.441468	0.419969	0.115576	0.178426	0.0160966	0.0629513	0.327908	0.338311	0.308489	0.288245	0.0922927	0.123175	0.0582349	0.0265401	0.0297736	0.0349394	0.204052	0.342974	0.163228
0	0.212477	0.145332	0.0435171	0.660575	0.547263	0.188139	0.434248	0.418939	0.0874419	0.0947228	0.56902	0.325894	0.53551	0.375063	0.409353	0.554616	0.279067	0.450284	0.132602	0.425122	0.409254	0.495618	0.287909	0.63574	0.420937	0.502648	0.615814	0.59494	0.661324	0.432418	0.407724	0.463393	0.623406	0.32158	0.276807	0.423137	0.154829	0.136123	0.28507	0.491364	0.466098	0.377455	0.126605	0.137586	0.233455	0.334711	0.53382	0.390726	0.26036
0	0.140563	0.0599499	0.02295	0.412879	0.427668	0.121266	0.41464	0.263123	0.178846	0.0413755	0.513209	0.265837	0.342898	0.379006	0.389867	0.451899	0.199799	0.610742	0.19627	0.422489	0.469191	0.385556	0.145988	0.292733	0.244141	0.365258	0.279518	0.29061	0.345054	0.351488	0.206409	0.309497	0.209918	0.360294	0.192403	0.24164	0.130265	0.0749598	0.145122	0.256114	0.390293	0.422278	0.22509	0.336499	0.210122	0.4089	0.515763	0.285372	0.269767
0	0.187151	0.0658166	0.025444	0.312632	0.500842	0.243775	0.590177	0.229241	0.0614282	0.0422308	0.688747	0.206162	0.356859	0.41156	0.410158	0.359111	0.172297	0.368384	0.123607	0.297509	0.461737	0.369885	0.128207	0.160469	0.305528	0.342622	0.280615	0.36368	0.388234	0.282782	0.226011	0.259627	0.195417	0.518988	0.156714	0.287528	0.176319	0.135005	0.215629	0.311577	0.50893	0.421326	0.284764	0.169295	0.253428	0.264099	0.586405	0.285155	0.50805
0	0.193774	0.104134	0.0498099	0.313778	0.542599	0.24301	0.539823	0.403043	0.12301	0.0762945	0.848423	0.379247	0.465618	0.486936	0.67011	0.539772	0.365729	0.546049	0.343031	0.553016	0.813465	0.517907	0.132714	0.219845	0.347615	0.498593	0.356671	0.456606	0.396513	0.532245	0.38811	0.499164	0.394174	0.787668	0.258617	0.3555	0.309268	0.187972	0.434802	0.756646	0.701922	0.672773	0.360168	0.220407	0.302189	0.512765	0.828284	0.710049	0.389577
0	0.336575	0.144437	0.0637395	0.647768	0.795228	0.331417	0.626842	0.500328	0.1769	0.107211	0.683566	0.339374	0.66379	0.443806	0.760298	0.581302	0.416774	0.367304	0.203419	0.529392	0.558334	0.657785	0.241267	0.404665	0.553068	0.736437	0.516097	0.595245	0.545902	0.493483	0.490111	0.547297	0.490785	0.445943	0.294168	0.366984	0.354195	0.336933	0.513749	0.516878	0.568374	0.497246	0.303932	0.127997	0.272511	0.423877	0.584658	0.626887	0.795157
0	0.0844245	0.000585361	0.00294776	0.11247	0.082087	0.00014422	0.13277	0.00165357	0.00149069	0.000384451	0.0100192	0.317727	0.0208153	0.000237006	0.0683776	0.0956213	0.00118226	0.330912	0.00168294	0.0175805	0.0158567	0.657227	0.0676271	0.00101746	0.0402775	0.00979829	0.0459835	0.0337009	0.00369105	0.00573569	0.00684431	0.013266	0.0216765	0.00618272	0.00294896	0.265215	0.022607	0.000192042	0.0350874	0.218896	0.00234768	0.00928593	3.0423e-05	0.00459582	0.158365	0.00762054	1.61078e-05	0.142753	0.00560095
0	0.16652	0.030819	0.0417551	0.284659	0.290844	0.102014	0.202898	0.158643	0.0438849	0.0929324	0.219774	0.126705	0.271916	0.219225	0.478379	0.187157	0.271083	0.230617	0.51806	0.311472	0.303038	0.179172	0.147414	0.116636	0.234349	0.366358	0.248233	0.399034	0.216712	0.219707	0.32753	0.398088	0.305154	0.232066	0.0881727	0.178734	0.30882	0.33522	0.413384	0.302503	0.212028	0.197764	0.114801	0.0950001	0.0908957	0.0872505	0.235938	0.31058	0.393774
0	0.204969	0.103271	0.0501657	0.411341	0.613823	0.26836	0.490585	0.55183	0.331007	0.0742424	0.635912	0.418937	0.652303	0.491187	0.748655	0.562633	0.408713	0.50731	0.333157	0.536957	0.707794	0.556081	0.175783	0.307222	0.513795	0.62214	0.537882	0.628259	0.458522	0.488499	0.492241	0.668644	0.386167	0.723334	0.193464	0.311783	0.245655	0.168202	0.370112	0.595888	0.670714	0.600542	0.26057	0.132939	0.236735	0.385119	0.616225	0.660385	0.425069
0	0.0899118	0.0200403	0.0258977	0.105857	0.178505	0.0722689	0.0952249	0.17902	0.104795	0.0386733	0.0810356	0.112581	0.345079	0.369035	0.14058	0.159801	0.290517	0.0566758	0.583539	0.197628	0.172558	0.133084	0.0603762	0.0578521	0.151467	0.196532	0.371842	0.298292	0.119643	0.131528	0.442324	0.420967	0.115467	0.178727	0.0159073	0.0627558	0.328233	0.338184	0.308433	0.288898	0.0920393	0.122539	0.057881	0.0263857	0.0295581	0.0348382	0.203993	0.343418	0.162011
0	0.336788	0.194594	0.0529147	0.855927	0.901515	0.263081	0.591205	0.482254	0.110882	0.095929	0.698992	0.340379	0.701667	0.564177	0.729785	0.507703	0.49721	0.407035	0.263439	0.664026	0.729761	0.50037	0.263881	0.509094	0.487266	0.82191	0.824109	0.773703	0.337979	0.667495	0.71402	0.686677	0.650889	0.413653	0.346633	0.36707	0.25697	0.345009	0.543908	0.583009	0.58461	0.664663	0.225502	0.133033	0.211457	0.332188	0.844285	0.529398	0.698783
0	0.28861	0.136965	0.111137	0.823902	0.748416	0.257992	0.673719	0.495312	0.115355	0.0580049	0.745477	0.455711	0.613787	0.40951	0.728646	0.52109	0.419423	0.58018	0.202703	0.533213	0.621487	0.588725	0.332938	0.682578	0.568831	0.823727	0.597748	0.687306	0.702856	0.543093	0.473491	0.620927	0.652738	0.444462	0.354328	0.499283	0.314245	0.217284	0.439513	0.57196	0.645038	0.51708	0.219954	0.313379	0.284284	0.338282	0.430854	0.516951	0.522132
0	0.16606	0.0341077	0.0314973	0.32076	0.341881	0.12132	0.268629	0.20559	0.107854	0.0583338	0.227795	0.172879	0.335859	0.264532	0.262229	0.247699	0.372091	0.124001	0.351406	0.301307	0.286822	0.290749	0.121892	0.163892	0.204692	0.380437	0.36827	0.440577	0.246406	0.224558	0.339182	0.385994	0.257104	0.25022	0.0781827	0.151934	0.572534	0.561555	0.627636	0.344089	0.230828	0.241087	0.117935	0.0508048	0.0849571	0.0957046	0.307194	0.46306	0.326917
0	0.136721	0.0221956	0.0289023	0.206128	0.219413	0.112271	0.167582	0.135685	0.0334321	0.0487639	0.157736	0.102207	0.242976	0.222537	0.195478	0.130069	0.280276	0.0824462	0.348615	0.20881	0.218012	0.143977	0.0741675	0.0940827	0.150165	0.267044	0.266563	0.392339	0.199905	0.187251	0.373711	0.614097	0.122963	0.125863	0.0463537	0.0960168	0.592433	0.649858	0.484433	0.205746	0.122091	0.193049	0.0895478	0.0339091	0.0528346	0.0463823	0.186464	0.302241	0.467394
0	0.0818813	0.0416783	0.0224871	0.235821	0.29011	0.0651864	0.142708	0.230434	0.0659793	0.0335391	0.115819	0.184447	0.313761	0.349758	0.227092	0.20588	0.326284	0.119603	0.514885	0.366802	0.365183	0.230319	0.0842924	0.108972	0.174894	0.198837	0.435071	0.493014	0.192679	0.28071	0.46788	0.518068	0.156307	0.217361	0.0307435	0.102837	0.455359	0.364211	0.399294	0.370392	0.168393	0.268065	0.0685564	0.0273465	0.0476069	0.0839163	0.28297	0.388245	0.135482
0	0.0976386	0.00126323	0.00413199	0.0751302	0.0695067	0.00520087	0.123144	0.00340276	0.00629789	0.000492661	0.0284227	0.407842	0.0254757	0.00206649	0.0723375	0.0936399	0.0089389	0.430286	0.00420838	0.027204	0.0244925	0.608928	0.15702	0.00248886	0.0832985	0.0127164	0.0408624	0.0468199	0.00351535	0.0153163	0.00903081	0.01778	0.0178806	0.010041	0.0110296	0.285315	0.0442218	0.00209369	0.0799884	0.312415	0.00387491	0.0154254	0.000175032	0.00691808	0.172726	0.0089105	9.0652e-05	0.150024	0.00531715
0	0.270258	0.238883	0.0399764	0.905183	0.689875	0.29637	0.669884	0.505564	0.178139	0.0608558	0.726803	0.412373	0.681124	0.444733	0.661621	0.613679	0.3524	0.601899	0.198501	0.646586	0.631927	0.785993	0.319426	0.582779	0.48686	0.680176	0.600105	0.658062	0.620606	0.555589	0.451852	0.566352	0.504588	0.503954	0.34058	0.417299	0.338477	0.250439	0.439835	0.537083	0.567054	0.537845	0.224566	0.142492	0.318867	0.383659	0.578303	0.578982	0.515949
0	0.108336	0.0664636	0.0271356	0.436486	0.300573	0.101018	0.272704	0.236726	0.144131	0.0484862	0.444467	0.194804	0.31481	0.296786	0.326202	0.258018	0.16635	0.345659	0.071431	0.254923	0.306007	0.314728	0.194536	0.407493	0.252209	0.330177	0.284607	0.308376	0.371913	0.32148	0.210537	0.328774	0.214734	0.192239	0.152005	0.22734	0.0972386	0.055584	0.138089	0.303608	0.344611	0.346223	0.136972	0.386167	0.228142	0.25226	0.28123	0.306963	0.298753
0	0.153282	0.0890545	0.0296965	0.519168	0.412111	0.148611	0.458191	0.217046	0.0272453	0.0552939	0.380756	0.218843	0.377149	0.362551	0.328818	0.33085	0.208081	0.416988	0.147791	0.353827	0.402746	0.339487	0.177784	0.397944	0.248289	0.326712	0.401484	0.463558	0.467076	0.47116	0.335391	0.328627	0.231128	0.282789	0.145041	0.234287	0.103985	0.0827456	0.182001	0.354924	0.409094	0.387147	0.149434	0.345522	0.179505	0.190758	0.59673	0.24687	0.306253
0	0.199558	0.0649328	0.0377229	0.431938	0.534381	0.253238	0.484892	0.454038	0.137653	0.0580268	0.633739	0.357036	0.495915	0.535609	0.712836	0.497254	0.350215	0.564192	0.328278	0.570949	0.790083	0.504243	0.174175	0.381834	0.380182	0.472109	0.403901	0.623121	0.441839	0.475108	0.480582	0.472599	0.340015	0.695056	0.203668	0.294984	0.21419	0.146035	0.35182	0.573952	0.694943	0.608721	0.287966	0.165227	0.230219	0.435343	0.829723	0.659059	0.355298
0	0.205421	0.0535516	0.0267597	0.207787	0.298485	0.0987746	0.17012	0.225018	0.0704526	0.0454605	0.181046	0.139831	0.311373	0.239584	0.321154	0.198951	0.355829	0.136374	0.469708	0.269527	0.256741	0.217502	0.0881401	0.11339	0.20903	0.348896	0.333424	0.361272	0.215461	0.221622	0.387519	0.402012	0.170001	0.226336	0.0514539	0.117931	0.471312	0.516363	0.567647	0.354509	0.160002	0.224169	0.0895258	0.0340044	0.0614006	0.0802334	0.285189	0.451343	0.357551
0	0.198332	0.0623861	0.0403104	0.427814	0.502449	0.257259	0.463796	0.469546	0.155421	0.0611231	0.631132	0.363974	0.504905	0.51402	0.728007	0.519525	0.355072	0.581366	0.339321	0.583308	0.802225	0.496337	0.170112	0.330508	0.398448	0.485276	0.404767	0.637852	0.421003	0.48075	0.479106	0.500709	0.350829	0.72853	0.201454	0.298262	0.212054	0.139056	0.344006	0.574063	0.706052	0.608082	0.298819	0.165177	0.231295	0.44389	0.796899	0.675675	0.358109
0	0.242111	0.166951	0.0451665	0.755193	0.635346	0.206677	0.470619	0.464491	0.116449	0.0970516	0.601381	0.362378	0.554092	0.380766	0.464388	0.529832	0.292496	0.484677	0.125892	0.441228	0.427929	0.581754	0.32262	0.779077	0.447795	0.562743	0.628952	0.585721	0.679664	0.428616	0.399527	0.484564	0.645404	0.326779	0.302781	0.448318	0.182333	0.154881	0.309396	0.453006	0.466291	0.381141	0.117673	0.129384	0.240202	0.370285	0.454129	0.431418	0.298746
0	0.195695	0.153261	0.0811906	0.823462	0.809477	0.247149	0.656139	0.72459	0.198035	0.173478	0.638689	0.479084	0.882756	0.5736	0.923268	0.664278	0.597432	0.667516	0.465987	0.850518	0.900876	0.614609	0.347626	0.561565	0.659997	0.74742	0.952155	0.868615	0.806868	0.707472	0.769172	0.755848	0.902419	0.648543	0.340585	0.484526	0.352584	0.344678	0.668695	0.95099	0.65007	0.716924	0.16291	0.329169	0.208504	0.417862	0.832573	0.86959	0.290501
0	0.066717	0.0103449	0.0145473	0.0790277	0.0642047	0.0334451	0.0367276	0.104436	0.051156	0.0227829	0.043992	0.0466645	0.161683	0.0654089	0.0827276	0.0852578	0.109327	0.087385	0.17272	0.112023	0.0995197	0.0606135	0.0313534	0.0307196	0.129087	0.150834	0.143437	0.15037	0.0629346	0.0769509	0.121494	0.217269	0.071523	0.0792771	0.0131441	0.0449717	0.0975756	0.0983414	0.103159	0.11264	0.0586904	0.098118	0.0346614	0.0247413	0.0442944	0.0286001	0.0352338	0.150396	0.1544
0	0.0841426	0.0167033	0.0213588	0.0762258	0.113864	0.0465881	0.0577929	0.119617	0.0486149	0.0341506	0.0513567	0.07345	0.279691	0.183649	0.086461	0.134931	0.171691	0.0387239	0.301876	0.117041	0.0901527	0.082384	0.0345932	0.0350905	0.116256	0.173574	0.242416	0.183152	0.0767942	0.102934	0.236661	0.241197	0.0914505	0.0931041	0.0165494	0.0556549	0.180443	0.197985	0.178258	0.156155	0.0808092	0.0904184	0.0634682	0.0332615	0.052106	0.0199827	0.111121	0.183494	0.197646
0	0.142368	0.0737853	0.0274769	0.501735	0.380411	0.129337	0.419356	0.18657	0.0315896	0.0522126	0.350822	0.179421	0.329379	0.342826	0.374134	0.242269	0.198424	0.408938	0.153292	0.349669	0.375644	0.286468	0.176849	0.364216	0.241773	0.360358	0.336494	0.443767	0.435575	0.421353	0.316331	0.365976	0.270929	0.257745	0.165639	0.243003	0.0977061	0.0842683	0.173038	0.318928	0.382657	0.320175	0.123395	0.340675	0.152873	0.18447	0.510856	0.269309	0.297891
0	0.158248	0.0551667	0.0302185	0.369374	0.438226	0.0967227	0.224385	0.298318	0.0617049	0.0468655	0.191298	0.243127	0.425915	0.437351	0.313751	0.291869	0.469321	0.162832	0.520354	0.413665	0.422759	0.329613	0.115236	0.203283	0.252778	0.339185	0.539006	0.494431	0.355548	0.301475	0.577355	0.538378	0.217209	0.290407	0.078023	0.127349	0.756112	0.668452	0.77741	0.51216	0.243031	0.318973	0.0949553	0.0376905	0.0751864	0.127801	0.429584	0.661303	0.277104
0	0.179643	0.0901059	0.0479406	0.442737	0.345831	0.249026	0.313948	0.370188	0.163605	0.0740631	0.414322	0.306383	0.502483	0.29695	0.449965	0.559962	0.213929	0.393334	0.167393	0.319565	0.353254	0.385259	0.155114	0.26953	0.432724	0.485488	0.494568	0.399376	0.404975	0.301089	0.255122	0.314019	0.378186	0.359654	0.191028	0.254498	0.143241	0.101975	0.195655	0.280261	0.437225	0.325564	0.228348	0.16666	0.224593	0.261348	0.361801	0.30302	0.45227
0	0.204186	0.133553	0.0690228	0.504869	0.72819	0.162495	0.519906	0.732046	0.402402	0.0860158	0.600755	0.644218	0.654001	0.284207	0.760286	0.8361	0.439275	0.774608	0.278451	0.571003	0.941466	0.814309	0.235176	0.481935	0.698813	0.725882	0.843938	0.412147	0.573592	0.396275	0.375229	0.922172	0.431009	0.854797	0.232346	0.385147	0.482339	0.168001	0.468236	0.840311	0.635913	0.678461	0.173244	0.127533	0.272569	0.487048	0.207155	0.746363	0.371001
0	0.0780368	0.00149949	0.00221158	0.0446711	0.0911902	0.00139839	0.364814	0.00291115	0.0132428	0.000488328	0.0443075	0.408929	0.0064966	0.00101227	0.0711055	0.110273	0.0058973	0.215236	0.00099037	0.0116295	0.0372515	0.816494	0.0614728	0.00339844	0.0428366	0.0182641	0.0277752	0.0126138	0.00368521	0.0046263	0.00322414	0.0063777	0.00768167	0.0100899	0.0163706	0.229839	0.0589881	0.000913568	0.0664657	0.416427	0.00694279	0.0196886	0.000915847	0.0078945	0.253537	0.0282279	0.000285134	0.216328	0.00854478
0	0.172954	0.0753602	0.041661	0.595225	0.47272	0.300358	0.480444	0.508181	0.245647	0.0718094	0.665183	0.360362	0.600565	0.523831	0.770215	0.559434	0.311816	0.685001	0.295677	0.594073	0.733977	0.519178	0.194567	0.299055	0.51902	0.581372	0.414333	0.627318	0.483595	0.52285	0.427641	0.482675	0.480765	0.64704	0.264939	0.343689	0.187781	0.132418	0.287697	0.489456	0.782713	0.59801	0.435708	0.134869	0.29843	0.556473	0.757828	0.600256	0.462007
0	0.0881358	0.000678036	0.00464102	0.0413687	0.0626644	0.0014092	0.126532	0.0020825	0.00449707	0.000463118	0.0146259	0.327724	0.0165484	0.000970583	0.0586072	0.0862073	0.00457461	0.221277	0.00257377	0.0148004	0.0242282	0.523279	0.0885889	0.00345146	0.0459085	0.012194	0.0378808	0.0201777	0.00307388	0.00894661	0.00460728	0.0169346	0.00925142	0.00626134	0.0044316	0.200407	0.0599456	0.00121817	0.0713086	0.333502	0.00328465	0.0222081	0.000211328	0.0078821	0.246299	0.010856	0.000113799	0.184928	0.00781569
0	0.122434	0.00264689	0.0047138	0.128437	0.06159	0.00236082	0.0956875	0.0099809	0.0198179	0.000846796	0.0369744	0.29309	0.0382969	0.00109108	0.0744874	0.110384	0.012096	0.561904	0.00556429	0.0308463	0.0426622	0.5757	0.191559	0.000277961	0.153823	0.0161943	0.0319092	0.0462686	0.00208789	0.00919683	0.0111341	0.0162601	0.0406197	0.00830622	0.0250382	0.44946	0.0446079	0.00320676	0.0863484	0.211141	0.0053386	0.0247253	8.84137e-05	0.00827843	0.153805	0.0115191	2.08286e-05	0.0989662	0.004778
0	0.27384	0.115218	0.0508466	0.733025	0.923651	0.306198	0.945424	0.684904	0.0948437	0.0726495	0.954834	0.635963	0.524507	0.53087	0.758467	0.810255	0.59368	0.671819	0.288991	0.711336	0.880803	0.396823	0.298632	0.828986	0.489291	0.947126	0.386014	0.478949	0.484298	0.685288	0.521046	0.795088	0.457652	0.64729	0.511459	0.415088	0.678146	0.350566	0.628385	0.68123	0.724522	0.808965	0.140442	0.196884	0.371837	0.186314	0.638331	0.748942	0.580041
0	0.108434	0.0300645	0.0239621	0.274469	0.289254	0.096384	0.228518	0.183295	0.0883484	0.0375965	0.25949	0.192464	0.283387	0.226365	0.274578	0.250418	0.388972	0.156788	0.443678	0.277195	0.311939	0.302742	0.0816874	0.12043	0.200904	0.330437	0.252947	0.230767	0.175662	0.237557	0.271366	0.467599	0.273994	0.23931	0.0807864	0.145169	0.678158	0.470107	0.553002	0.343231	0.182326	0.317207	0.13292	0.0815191	0.0910503	0.102342	0.185148	0.451459	0.355258
0	0.119552	0.04106	0.0225344	0.303462	0.2382	0.243093	0.323055	0.191879	0.167277	0.0377339	0.502071	0.163353	0.326836	0.512596	0.406952	0.229673	0.182663	0.362393	0.124296	0.244542	0.373734	0.286843	0.134614	0.269127	0.261768	0.321669	0.184095	0.28088	0.215838	0.272603	0.255006	0.245128	0.184524	0.317972	0.183538	0.215957	0.168662	0.128598	0.241707	0.342882	0.327303	0.392709	0.189136	0.119995	0.160792	0.273312	0.518168	0.343174	0.414955
0	0.194049	0.096237	0.0314518	0.563659	0.571368	0.183348	0.4182	0.420451	0.219173	0.0545033	0.507489	0.260463	0.49508	0.479208	0.662272	0.340824	0.26735	0.795462	0.314291	0.591975	0.689455	0.448296	0.177501	0.289061	0.392719	0.442157	0.400465	0.567615	0.439847	0.481553	0.37787	0.387933	0.26884	0.642545	0.197505	0.255633	0.150588	0.123126	0.248569	0.405829	0.463442	0.50427	0.191611	0.171568	0.161569	0.404367	0.749941	0.452767	0.251029
0	0.150421	0.0479674	0.0533904	0.22875	0.348303	0.102407	0.190924	0.29287	0.0935332	0.077207	0.174578	0.247306	0.517307	0.723823	0.340768	0.25824	0.565188	0.124707	0.49192	0.44576	0.459964	0.266197	0.128649	0.134888	0.240678	0.323516	0.51818	0.527927	0.207131	0.353943	0.782722	0.735306	0.213597	0.328832	0.0478861	0.111907	0.687942	0.698004	0.725332	0.568804	0.187089	0.365606	0.085825	0.0561732	0.044695	0.104105	0.474541	0.85083	0.237438
0	0.100318	0.0337261	0.0394372	0.212334	0.282961	0.0744606	0.141826	0.255128	0.0702028	0.0570894	0.146762	0.207305	0.419441	0.514398	0.281902	0.225764	0.479087	0.117587	0.709358	0.392526	0.412015	0.25274	0.095617	0.107176	0.187477	0.259643	0.446266	0.483936	0.161944	0.321149	0.610519	0.696869	0.171353	0.225783	0.0333257	0.0990406	0.660154	0.586149	0.59969	0.41099	0.148254	0.36861	0.0599474	0.041676	0.0403111	0.073759	0.264022	0.570851	0.160274
0	0.090764	0.00105817	0.00516001	0.0479178	0.086758	0.00141092	0.161164	0.00403469	0.0089664	0.000403186	0.0177584	0.459769	0.022382	0.00108347	0.0710403	0.11109	0.00660382	0.28292	0.003412	0.0265404	0.0408757	0.784178	0.0768959	0.00540934	0.0581544	0.0128333	0.052471	0.027902	0.00434118	0.0144179	0.0074091	0.0219723	0.0151585	0.00848213	0.0062246	0.230245	0.0822614	0.00185507	0.104975	0.482101	0.00412432	0.0297529	0.000313144	0.00551734	0.177885	0.0179611	0.000160806	0.252986	0.00454898
0	0.172112	0.037905	0.0250569	0.229761	0.37346	0.10822	0.135633	0.196059	0.0589242	0.0411549	0.174123	0.124393	0.323565	0.261491	0.227162	0.178702	0.360104	0.0880026	0.424229	0.268515	0.26836	0.210013	0.0659825	0.0898134	0.14344	0.311789	0.33715	0.328693	0.190849	0.222128	0.380339	0.433453	0.160099	0.199519	0.0404954	0.0992543	0.540775	0.579352	0.498639	0.28238	0.136853	0.254557	0.066994	0.0398792	0.0480533	0.0659678	0.24525	0.437846	0.292579
0	0.13911	0.0309656	0.0331084	0.22952	0.332444	0.0793778	0.147847	0.23846	0.0527492	0.0463955	0.122613	0.159741	0.33181	0.355895	0.300221	0.178152	0.427935	0.130219	0.608413	0.32779	0.371679	0.260695	0.0988445	0.103251	0.157022	0.299282	0.38295	0.455547	0.15534	0.272337	0.629713	0.654606	0.152008	0.21913	0.0316757	0.109882	0.652192	0.619508	0.58158	0.397358	0.12714	0.339102	0.0412766	0.0351271	0.0393004	0.0628441	0.203983	0.454191	0.229693
0	0.109787	0.0269812	0.0245006	0.255359	0.257486	0.0958617	0.215768	0.179472	0.100789	0.0393504	0.247779	0.184281	0.278575	0.213391	0.248481	0.260004	0.374515	0.15014	0.423881	0.271945	0.286006	0.27911	0.0816033	0.105353	0.205405	0.326519	0.232066	0.231803	0.147758	0.230676	0.242543	0.459778	0.291877	0.229127	0.0787991	0.143505	0.587572	0.41464	0.480929	0.296388	0.176181	0.309017	0.140426	0.0884232	0.0921476	0.094709	0.161309	0.398251	0.332347
0	0.148914	0.0294123	0.0205216	0.187871	0.165195	0.0684971	0.100204	0.166553	0.0270838	0.0358713	0.147712	0.113708	0.300376	0.250546	0.195607	0.113015	0.256627	0.0885606	0.356985	0.223786	0.21908	0.135148	0.0845409	0.0737313	0.2096	0.280144	0.273777	0.37416	0.165258	0.190211	0.344889	0.308603	0.130767	0.143481	0.0383773	0.0862124	0.292679	0.358004	0.316775	0.212563	0.121389	0.197497	0.0985631	0.0445418	0.054945	0.0464263	0.21057	0.291654	0.307348
0	0.171152	0.0344835	0.056986	0.44671	0.426945	0.106878	0.249143	0.161382	0.0260519	0.100985	0.216089	0.185897	0.339129	0.363006	0.304391	0.274681	0.287308	0.221669	0.463165	0.452173	0.420651	0.239205	0.198663	0.260011	0.204636	0.329193	0.450567	0.646919	0.282057	0.447476	0.534008	0.848095	0.311145	0.179703	0.0824888	0.168382	0.427934	0.390473	0.437625	0.384536	0.252729	0.335601	0.116637	0.085605	0.125384	0.101303	0.422156	0.297077	0.317203
0	0.144144	0.0511125	0.02272	0.376448	0.418657	0.0984771	0.236196	0.247534	0.0471006	0.0365246	0.238634	0.223226	0.33928	0.292487	0.321302	0.258847	0.41194	0.173146	0.539555	0.354901	0.398941	0.355081	0.0939027	0.195049	0.214262	0.334696	0.426969	0.383671	0.338751	0.267233	0.40851	0.448536	0.188807	0.267275	0.0833206	0.131274	0.864617	0.651768	0.787924	0.470481	0.238291	0.305437	0.107698	0.0433878	0.0812785	0.130411	0.329582	0.605056	0.345651
0	0.210561	0.138169	0.0500271	0.702241	0.818293	0.241083	0.622831	0.353933	0.0874383	0.0773604	0.576471	0.370754	0.78315	0.712398	0.657007	0.634939	0.468692	0.553434	0.47417	0.917867	0.834722	0.508162	0.284746	0.584628	0.399731	0.594459	0.7619	0.815147	0.685036	0.950346	0.645931	0.999419	0.411603	0.55729	0.177543	0.281183	0.400488	0.433463	0.58361	0.651534	0.793299	0.807719	0.297913	0.20156	0.270972	0.282816	0.834125	0.533075	0.596752
0	0.316038	0.122608	0.0594741	0.677173	0.867111	0.32402	0.780404	0.583285	0.124642	0.0948791	0.812215	0.470887	0.589814	0.485226	0.766823	0.687365	0.505089	0.492799	0.240752	0.60918	0.705826	0.522743	0.264637	0.598784	0.52405	0.840619	0.440145	0.533864	0.511686	0.580859	0.507628	0.653519	0.475928	0.528426	0.398856	0.387408	0.513418	0.355149	0.578645	0.590285	0.6415	0.640556	0.234795	0.161135	0.317605	0.316334	0.617876	0.68873	0.724287
0	0.0813703	0.0172668	0.023791	0.081676	0.142363	0.0578869	0.0732061	0.145788	0.0792639	0.036406	0.0578573	0.0899047	0.311555	0.272461	0.104449	0.149827	0.224972	0.0434799	0.440988	0.148965	0.120848	0.103612	0.0434613	0.0433397	0.12591	0.176132	0.30597	0.225041	0.0908405	0.109957	0.332242	0.32731	0.100459	0.132324	0.0143297	0.0566391	0.246143	0.255822	0.232599	0.218874	0.0829391	0.0974127	0.0574688	0.0287714	0.0403757	0.0252075	0.14969	0.255534	0.170089
0	0.114013	0.0302461	0.0319783	0.188279	0.217134	0.113047	0.147605	0.194597	0.0763785	0.057779	0.12699	0.13474	0.367934	0.486389	0.2075	0.176154	0.289395	0.091376	0.461529	0.297514	0.263394	0.163528	0.0873883	0.104202	0.197747	0.252718	0.31246	0.511296	0.154368	0.225227	0.47996	0.420291	0.193833	0.219345	0.0402898	0.0910603	0.353119	0.434844	0.417293	0.268111	0.136971	0.186256	0.0834899	0.0350349	0.0589529	0.0572406	0.349928	0.334745	0.252665
0	0.196863	0.0377235	0.0331349	0.255442	0.272482	0.117101	0.147942	0.175247	0.0976043	0.0539331	0.197358	0.131415	0.283028	0.233455	0.211876	0.220379	0.321327	0.114903	0.346695	0.296175	0.272557	0.225099	0.0817342	0.08533	0.165637	0.314617	0.259395	0.401096	0.160702	0.229265	0.284993	0.409774	0.165927	0.232082	0.0494932	0.101733	0.528417	0.483046	0.466442	0.254372	0.180132	0.248103	0.132382	0.060721	0.0582825	0.081258	0.210572	0.442796	0.291964
0	0.182989	0.0511894	0.0305851	0.434373	0.470811	0.129712	0.279244	0.22627	0.0865014	0.0583904	0.264175	0.192669	0.340362	0.29067	0.308699	0.22168	0.415541	0.160115	0.357439	0.325575	0.340194	0.368757	0.125014	0.202486	0.187972	0.382381	0.398558	0.399827	0.315722	0.240861	0.417301	0.489778	0.319645	0.237904	0.113831	0.196445	0.693198	0.665389	0.794421	0.487511	0.216461	0.270823	0.101916	0.0613309	0.0821816	0.11457	0.34953	0.542531	0.372168
0	0.0866422	0.000618988	0.0037469	0.0606402	0.0690058	0.00459491	0.128196	0.00076219	0.000750638	0.000381227	0.0205501	0.391722	0.0188229	0.00185398	0.0670983	0.084228	0.00579096	0.336546	0.00302362	0.0208313	0.0152301	0.572262	0.124262	0.0026728	0.0489353	0.0110967	0.0413526	0.0396277	0.00367385	0.013572	0.00697128	0.0164462	0.00995267	0.00898047	0.00455851	0.219092	0.0390355	0.00122958	0.0638083	0.303761	0.00299999	0.0115102	0.000166111	0.00667416	0.197456	0.00714339	9.38332e-05	0.156972	0.00641599
0	0.0678068	0.010649	0.0147644	0.078555	0.0651476	0.0334714	0.0369301	0.103687	0.0491999	0.0232524	0.0439967	0.0471087	0.166055	0.0664089	0.081857	0.0870098	0.109472	0.0845189	0.171311	0.110392	0.0971984	0.0605079	0.0309985	0.0304615	0.127832	0.151889	0.144915	0.149621	0.0628357	0.0779129	0.121928	0.213422	0.0720457	0.0776807	0.0134568	0.0454804	0.098071	0.100195	0.103917	0.111223	0.0597381	0.0972936	0.0365472	0.0254604	0.0454062	0.0278322	0.0369709	0.147872	0.158333
0	0.183219	0.128915	0.0322966	0.418127	0.728448	0.186717	0.575388	0.376796	0.0375439	0.0548315	0.584309	0.348094	0.515042	0.551089	0.462218	0.560251	0.312889	0.414681	0.182478	0.418677	0.572349	0.49688	0.169937	0.596056	0.349453	0.381086	0.578441	0.519814	0.673725	0.47845	0.478138	0.38344	0.306576	0.396138	0.193184	0.308459	0.198406	0.149549	0.345586	0.684346	0.527544	0.562194	0.197803	0.188184	0.237301	0.283474	0.929075	0.392129	0.325648
0	0.178469	0.0918528	0.0286036	0.339985	0.504851	0.135312	0.406658	0.315907	0.0950527	0.0496406	0.460704	0.230922	0.3628	0.332391	0.613954	0.316515	0.297013	0.348495	0.167649	0.346266	0.386909	0.343003	0.148518	0.272621	0.358092	0.535971	0.351455	0.425801	0.463302	0.290685	0.377966	0.4741	0.468554	0.329768	0.23209	0.32793	0.17515	0.149154	0.29828	0.511623	0.38162	0.283105	0.114132	0.136237	0.144662	0.258464	0.432766	0.47296	0.30813
0	0.180321	0.026932	0.0322166	0.234889	0.181107	0.133415	0.113957	0.132838	0.0315252	0.060823	0.135615	0.106936	0.352219	0.256143	0.200408	0.195621	0.270637	0.0791042	0.316798	0.235536	0.186099	0.1351	0.146257	0.0842289	0.184518	0.390756	0.238844	0.438612	0.127774	0.242744	0.357553	0.371053	0.223486	0.114162	0.0584202	0.120815	0.340289	0.475841	0.347338	0.193892	0.143479	0.207117	0.155097	0.0644029	0.0669476	0.0460056	0.222347	0.286035	0.435181
0	0.124223	0.04135	0.0231623	0.303328	0.239633	0.246889	0.326648	0.187749	0.160039	0.038093	0.502408	0.162376	0.328641	0.529237	0.414039	0.225527	0.183046	0.355224	0.118151	0.231988	0.371805	0.286902	0.140089	0.286827	0.263277	0.327469	0.179032	0.273003	0.210866	0.270808	0.260698	0.246178	0.179659	0.311765	0.183454	0.217031	0.167136	0.128857	0.243628	0.343253	0.320765	0.400103	0.186597	0.118349	0.164591	0.258597	0.513781	0.335068	0.4333
0	0.158467	0.0394559	0.0236506	0.273263	0.204714	0.0597006	0.105649	0.203648	0.119135	0.0468193	0.0890445	0.132105	0.369472	0.205135	0.298542	0.185989	0.275483	0.191558	0.761805	0.276399	0.253879	0.178691	0.089304	0.0841493	0.230275	0.284837	0.472018	0.340989	0.213043	0.180326	0.371692	0.325587	0.163524	0.170833	0.0325214	0.100283	0.338521	0.369082	0.327351	0.232217	0.0996411	0.165652	0.0383581	0.0195221	0.0365194	0.0584174	0.205404	0.326652	0.149153
0	0.094034	0.0247815	0.0247873	0.231202	0.223715	0.0785735	0.170147	0.169664	0.086185	0.0442618	0.162094	0.137014	0.296792	0.204942	0.204536	0.215344	0.322463	0.113271	0.457021	0.261192	0.235021	0.207963	0.0802222	0.0875454	0.191574	0.293529	0.283294	0.29817	0.159147	0.186437	0.24829	0.426731	0.281992	0.184849	0.0665807	0.127663	0.398737	0.363733	0.356541	0.230081	0.146076	0.233984	0.102071	0.063926	0.0627051	0.0699352	0.169162	0.301188	0.262865
0	0.234075	0.0364306	0.0556287	0.201416	0.163769	0.105401	0.136767	0.141952	0.0953274	0.0740632	0.17595	0.114927	0.226489	0.183805	0.181689	0.206843	0.292516	0.109378	0.245058	0.283769	0.24606	0.186145	0.0919213	0.0649558	0.181485	0.307462	0.136094	0.368536	0.094981	0.201362	0.21907	0.328218	0.153714	0.312387	0.060802	0.0981294	0.437842	0.381729	0.399076	0.204281	0.179892	0.205856	0.265484	0.131859	0.0755171	0.0787069	0.150469	0.33506	0.335145
0	0.0953614	0.0559446	0.0226954	0.387147	0.279953	0.134842	0.277436	0.235656	0.175705	0.0427323	0.459517	0.188548	0.304296	0.299575	0.321638	0.261543	0.168878	0.378871	0.112873	0.29671	0.334822	0.307969	0.149114	0.292829	0.246167	0.298128	0.267066	0.325222	0.334887	0.303766	0.200205	0.291008	0.219516	0.261148	0.160534	0.219244	0.128569	0.0790859	0.164928	0.315792	0.360525	0.329295	0.160559	0.295469	0.18672	0.316432	0.372231	0.347024	0.258256
0	0.287069	0.221891	0.0428251	0.742899	0.998426	0.269275	0.664717	0.548078	0.149424	0.0706358	0.687032	0.473239	0.61969	0.535074	0.637054	0.535623	0.361229	0.51968	0.153966	0.470117	0.579976	0.74421	0.26841	0.999105	0.472533	0.595667	0.63551	0.543902	0.731007	0.5125	0.463188	0.480663	0.396047	0.414474	0.270575	0.408299	0.242372	0.190532	0.384221	0.54238	0.518064	0.549753	0.198769	0.1749	0.26549	0.380823	0.631286	0.494489	0.486581
0	0.05805	0.0192378	0.0242211	0.237727	0.185262	0.354482	0.19847	0.21674	0.182795	0.0430999	0.408884	0.15943	0.258841	0.289425	0.370416	0.240352	0.163738	0.364737	0.169311	0.305426	0.324829	0.172284	0.125528	0.176706	0.290266	0.342012	0.150587	0.332273	0.21106	0.241855	0.199298	0.473423	0.268557	0.273659	0.172545	0.193045	0.140084	0.094826	0.167026	0.275379	0.461311	0.291779	0.269403	0.35175	0.144872	0.306102	0.21088	0.323699	0.301616
0	0.132977	0.02936	0.0239648	0.263986	0.34395	0.110621	0.213543	0.220012	0.0715475	0.0376253	0.221739	0.201073	0.310472	0.232269	0.308572	0.257795	0.453265	0.159984	0.630226	0.280362	0.333458	0.312824	0.0828025	0.113536	0.20339	0.387061	0.315038	0.246205	0.204518	0.214848	0.347946	0.53663	0.25743	0.250155	0.0765932	0.133921	0.494852	0.362909	0.661108	0.360295	0.171867	0.303713	0.120317	0.0663051	0.0719657	0.101562	0.179954	0.541498	0.392363
0	0.134216	0.028133	0.0215746	0.19137	0.170672	0.0667801	0.105858	0.164956	0.0384727	0.0386111	0.133021	0.107978	0.299909	0.236833	0.187457	0.126063	0.258576	0.0864648	0.384285	0.229163	0.211305	0.136712	0.0823546	0.0723124	0.202088	0.273895	0.283755	0.373433	0.165498	0.178226	0.321099	0.326206	0.160958	0.145099	0.0417848	0.0915534	0.27529	0.34493	0.298126	0.202256	0.121681	0.188006	0.0923675	0.0437984	0.049743	0.0469509	0.202577	0.27456	0.278043
0	0.151607	0.0308072	0.0204256	0.185594	0.171917	0.0689188	0.103442	0.169504	0.0282668	0.0352609	0.151148	0.114522	0.297087	0.249653	0.201239	0.114596	0.260616	0.0901083	0.35804	0.223185	0.220169	0.139177	0.0832057	0.0752614	0.209711	0.280719	0.272796	0.373105	0.167386	0.190183	0.345429	0.310747	0.130147	0.14833	0.0386495	0.0870882	0.300384	0.362061	0.329181	0.221203	0.123772	0.198153	0.0988898	0.0439123	0.0550646	0.048364	0.215157	0.300746	0.307429
0	0.0843502	0.000580215	0.00292225	0.113189	0.0820362	0.00013009	0.132512	0.0016267	0.00140854	0.000384267	0.00994046	0.316128	0.0207933	0.000227546	0.068348	0.0954486	0.0011216	0.331428	0.00166297	0.0174763	0.0155766	0.655821	0.0675194	0.000967903	0.0400738	0.009766	0.045904	0.0337612	0.00368361	0.00563607	0.00683682	0.0131644	0.0217471	0.00615753	0.00291533	0.265605	0.0219351	0.000173227	0.034297	0.215942	0.00232867	0.00905481	2.74424e-05	0.00458622	0.158169	0.00750815	1.45296e-05	0.141513	0.00561383
0	0.161139	0.0364318	0.0234454	0.296047	0.341147	0.102268	0.144601	0.205936	0.0677229	0.0389387	0.171139	0.132381	0.346556	0.276642	0.224752	0.189475	0.36291	0.125138	0.493088	0.352282	0.311674	0.222992	0.0822955	0.104515	0.167787	0.311075	0.384946	0.409455	0.211789	0.253148	0.415458	0.498403	0.164454	0.206065	0.0436532	0.100435	0.502421	0.554417	0.481081	0.291737	0.143254	0.277042	0.0694618	0.0403311	0.043809	0.0770849	0.262548	0.456988	0.253044
0	0.0961102	0.040935	0.0192806	0.280242	0.283278	0.0705341	0.148469	0.235931	0.0673851	0.031649	0.116493	0.174161	0.319661	0.323102	0.23194	0.202301	0.312583	0.147963	0.536696	0.407624	0.368447	0.227113	0.0958026	0.115348	0.188693	0.229699	0.433409	0.504244	0.204726	0.276584	0.470461	0.512444	0.163536	0.217841	0.0365409	0.104513	0.39677	0.379151	0.390539	0.354938	0.165143	0.259182	0.0713805	0.0383096	0.0442505	0.0900456	0.286209	0.399027	0.151533
0	0.224493	0.0799268	0.0699219	0.500904	0.488518	0.161478	0.474795	0.377899	0.0877971	0.108581	0.769704	0.345715	0.768462	0.874597	0.867683	0.599423	0.428325	0.657199	0.587519	0.69298	0.842221	0.421703	0.249688	0.417579	0.51932	0.690389	0.436209	0.70817	0.383442	0.582767	0.591666	0.677453	0.416117	0.70936	0.222015	0.297179	0.535122	0.424664	0.633019	0.725412	0.922786	0.66262	0.607634	0.488157	0.358937	0.389993	0.857384	0.726391	0.915917
0	0.256774	0.229197	0.040027	0.902987	0.655114	0.301534	0.64158	0.504921	0.201535	0.0630299	0.715442	0.398851	0.692526	0.449383	0.674542	0.607015	0.332992	0.622475	0.198674	0.639959	0.6241	0.779233	0.311033	0.540232	0.507511	0.672909	0.593297	0.659614	0.621187	0.551989	0.439117	0.548068	0.521646	0.502712	0.334378	0.416296	0.307294	0.233437	0.409663	0.51653	0.592568	0.531978	0.267191	0.135308	0.323696	0.424746	0.58612	0.564636	0.521488
0	0.257046	0.161849	0.108161	0.829451	0.797214	0.231564	0.614956	0.522715	0.137164	0.117623	0.623116	0.448827	0.759527	0.459606	0.822322	0.502894	0.505343	0.578871	0.336483	0.67647	0.690777	0.608279	0.348471	0.631707	0.606782	0.788467	0.798	0.781939	0.771059	0.623536	0.60874	0.677822	0.781798	0.479035	0.320361	0.499059	0.322526	0.288634	0.555395	0.703024	0.599691	0.527099	0.200155	0.335398	0.250213	0.367323	0.542189	0.623814	0.417876
0	0.0992853	0.0316175	0.031459	0.163699	0.228337	0.113431	0.155487	0.20293	0.0875262	0.05444	0.130003	0.136417	0.357517	0.551533	0.206085	0.170524	0.285338	0.0904281	0.479129	0.294243	0.270025	0.16988	0.0740265	0.107514	0.197382	0.213018	0.300611	0.546992	0.148458	0.217708	0.50558	0.425662	0.188865	0.246219	0.0358485	0.0849716	0.352286	0.412101	0.431092	0.29219	0.141515	0.17174	0.0814348	0.029581	0.0561414	0.0617592	0.395158	0.351114	0.195218
0	0.0816388	0.00137459	0.00304603	0.04559	0.0899358	0.00140193	0.307177	0.00322913	0.0120325	0.000464232	0.0367937	0.423317	0.0109924	0.00103242	0.071087	0.110504	0.00609726	0.234391	0.00167573	0.0158496	0.0382772	0.807348	0.0658378	0.00396756	0.0471718	0.0167271	0.0347645	0.0169406	0.00387086	0.00739748	0.00440855	0.0107912	0.00979773	0.00963491	0.0134991	0.229954	0.0655749	0.00118003	0.0773645	0.435014	0.00614512	0.022537	0.000745272	0.00722172	0.232126	0.0253222	0.000249947	0.226703	0.0074139
0	0.160895	0.0310503	0.023858	0.221268	0.242341	0.111691	0.166526	0.168334	0.0641104	0.0380008	0.227809	0.130981	0.242984	0.222181	0.281824	0.198609	0.332221	0.137885	0.368075	0.258189	0.229283	0.205373	0.102275	0.153801	0.200639	0.331535	0.220415	0.356255	0.194743	0.255904	0.297506	0.397339	0.172895	0.203675	0.0719849	0.128691	0.637675	0.63965	0.660506	0.351461	0.254789	0.227176	0.179817	0.128114	0.0952166	0.0949252	0.251553	0.392492	0.436635
0	0.108323	0.0256505	0.0221412	0.22942	0.256826	0.105627	0.135791	0.197515	0.078856	0.0359068	0.113892	0.119056	0.328727	0.523563	0.182814	0.181429	0.308934	0.0797516	0.483879	0.303923	0.25047	0.205337	0.106393	0.090442	0.142327	0.186462	0.289421	0.558699	0.115995	0.235813	0.602936	0.526305	0.136591	0.22024	0.0219663	0.0801553	0.423832	0.57241	0.449656	0.283078	0.102606	0.205345	0.0522596	0.0222482	0.0330031	0.0548195	0.285288	0.34262	0.181014
0	0.1184	0.0331372	0.0244915	0.303922	0.320215	0.101249	0.234053	0.193999	0.093425	0.0413	0.256525	0.192519	0.296786	0.234385	0.267766	0.251966	0.394337	0.15622	0.424456	0.284719	0.304852	0.308606	0.0898361	0.132589	0.203044	0.337832	0.278647	0.25137	0.194436	0.23578	0.289507	0.480584	0.310371	0.228081	0.0907831	0.160568	0.628909	0.478316	0.56713	0.354817	0.182321	0.309331	0.127324	0.0830081	0.0917383	0.101294	0.206832	0.434503	0.344728
0	0.326519	0.211524	0.0483787	0.924295	0.938033	0.233123	0.57634	0.471115	0.0915511	0.0899101	0.696925	0.346186	0.725351	0.621358	0.713585	0.486754	0.529031	0.433149	0.302702	0.731821	0.805794	0.437313	0.272835	0.552607	0.458177	0.843873	0.948222	0.847867	0.274238	0.753792	0.799932	0.768576	0.699444	0.415731	0.355137	0.361196	0.225101	0.350252	0.555742	0.616243	0.604808	0.742426	0.196205	0.138318	0.189858	0.290181	0.943022	0.491057	0.647213
0	0.188588	0.0979176	0.0518921	0.465051	0.363324	0.249099	0.311918	0.399344	0.163833	0.0798014	0.399917	0.329524	0.529833	0.259052	0.455309	0.613339	0.218747	0.399344	0.175108	0.333338	0.350032	0.40123	0.157447	0.267205	0.45962	0.510425	0.545065	0.419358	0.436148	0.305553	0.253965	0.324747	0.409765	0.367141	0.192024	0.260518	0.139325	0.0975019	0.187713	0.270117	0.455653	0.313337	0.23467	0.174559	0.234132	0.261668	0.336571	0.297557	0.454628
0	0.133363	0.0268379	0.0287569	0.274942	0.286105	0.110636	0.250203	0.180191	0.111376	0.0503205	0.245142	0.172586	0.300726	0.231675	0.253524	0.247461	0.372547	0.132432	0.363179	0.271308	0.272841	0.280763	0.102682	0.126692	0.200294	0.35917	0.27701	0.316871	0.174871	0.221736	0.275267	0.423301	0.287693	0.237802	0.0785828	0.152926	0.560912	0.47481	0.533062	0.308289	0.196621	0.274287	0.130576	0.0732545	0.0901391	0.0906527	0.2201	0.415118	0.339075
0	0.125721	0.0434782	0.0232104	0.316161	0.258974	0.233606	0.336987	0.196793	0.164133	0.0385732	0.505395	0.173987	0.332887	0.515635	0.413434	0.252871	0.185696	0.385745	0.128236	0.255693	0.384652	0.297214	0.141179	0.285101	0.262219	0.333829	0.190779	0.276375	0.226001	0.282391	0.255786	0.254325	0.184231	0.318429	0.185697	0.219783	0.163311	0.123472	0.233516	0.33337	0.330067	0.404382	0.193103	0.143067	0.17029	0.27692	0.519047	0.331062	0.417836
0	0.185313	0.11797	0.0750069	0.846648	0.675055	0.291254	0.694855	0.827474	0.239501	0.131556	0.775204	0.453368	0.815977	0.572055	0.864662	0.765784	0.488414	0.732278	0.355967	0.746182	0.918864	0.672819	0.333402	0.508394	0.680052	0.706029	0.871558	0.883619	0.810617	0.615313	0.70327	0.679588	0.885871	0.703138	0.358383	0.495429	0.238203	0.241866	0.532587	0.962258	0.743536	0.797824	0.184721	0.319435	0.188647	0.484103	0.896212	0.878251	0.300909
0	0.342114	0.156664	0.0610929	0.710931	0.823942	0.31677	0.622534	0.488977	0.144507	0.105156	0.689363	0.332848	0.666283	0.473406	0.752109	0.560963	0.434461	0.374255	0.213119	0.565014	0.59891	0.619342	0.249408	0.435914	0.532106	0.755705	0.584777	0.639356	0.495619	0.537024	0.545595	0.567736	0.533569	0.425589	0.31207	0.368608	0.332481	0.344936	0.526116	0.528308	0.569775	0.534772	0.288357	0.130686	0.258472	0.405432	0.658222	0.60162	0.784133
0	0.0890899	0.000797145	0.00483302	0.0435106	0.0704086	0.00140986	0.136031	0.00272225	0.00590503	0.000443059	0.0154178	0.370788	0.0185638	0.00100763	0.0626218	0.0942499	0.00523578	0.241744	0.00286451	0.0187151	0.0296344	0.607267	0.0849403	0.00410039	0.04999	0.0123555	0.042797	0.0227988	0.00348858	0.0107946	0.00554674	0.0186906	0.0112209	0.00696523	0.00492668	0.210047	0.067345	0.00143164	0.0824998	0.382035	0.00353249	0.024728	0.000239221	0.00709874	0.223579	0.0130656	0.000127951	0.207211	0.00672765
0	0.125178	0.0613747	0.0233078	0.486288	0.307975	0.150127	0.3911	0.184468	0.0867907	0.0459779	0.369295	0.180103	0.303789	0.308676	0.303072	0.232743	0.172232	0.429354	0.14919	0.341389	0.37223	0.313639	0.155507	0.303539	0.213517	0.291323	0.302291	0.394463	0.3575	0.391875	0.246942	0.277966	0.203752	0.28429	0.147023	0.205623	0.122124	0.0856685	0.165153	0.266305	0.37375	0.325624	0.142982	0.316582	0.145517	0.250049	0.484688	0.276869	0.263807
0	0.0791687	0.018298	0.0269652	0.0913081	0.181041	0.0732277	0.0944438	0.181311	0.119132	0.03939	0.0686127	0.11247	0.353908	0.390912	0.130585	0.168889	0.29702	0.0508619	0.625396	0.193349	0.16416	0.132751	0.0562302	0.0550592	0.140734	0.181824	0.390314	0.284494	0.111326	0.121128	0.460516	0.442163	0.113148	0.185118	0.0118859	0.0586049	0.335146	0.33548	0.307242	0.30276	0.0866581	0.109009	0.0503651	0.023106	0.0249816	0.0326871	0.20273	0.35285	0.136169
0	0.291227	0.0962647	0.08081	0.557058	0.504211	0.400087	0.429889	0.650532	0.444061	0.119327	0.602814	0.528408	0.821914	0.428458	0.725035	0.735653	0.383099	0.796454	0.314102	0.613445	0.922249	0.672843	0.271938	0.324239	0.753443	0.673253	0.624757	0.480128	0.442087	0.369205	0.364957	0.599644	0.464386	0.89654	0.205336	0.332575	0.343491	0.169261	0.395973	0.610095	0.613425	0.617309	0.272486	0.176847	0.267758	0.410396	0.315569	0.711608	0.432753
0	0.199397	0.0507194	0.0269631	0.210867	0.332945	0.107053	0.168351	0.216195	0.0625208	0.043979	0.196464	0.13749	0.312465	0.255897	0.288658	0.198086	0.372007	0.111753	0.414515	0.272746	0.262975	0.222112	0.0795577	0.111044	0.186609	0.341384	0.324047	0.36112	0.212773	0.233446	0.379279	0.428727	0.167342	0.225816	0.0506757	0.113649	0.51756	0.551003	0.57755	0.347068	0.16362	0.246725	0.0909726	0.0348983	0.0611309	0.0796374	0.289145	0.468559	0.359346
0	0.0921583	0.0215958	0.0341024	0.208954	0.141019	0.392323	0.20064	0.236926	0.157352	0.0527391	0.404224	0.164422	0.247429	0.309255	0.331451	0.237277	0.163315	0.386262	0.172413	0.322821	0.377446	0.190906	0.129828	0.16563	0.324761	0.329326	0.122563	0.350287	0.143328	0.31721	0.198312	0.514996	0.220309	0.264424	0.167376	0.190519	0.163337	0.10131	0.175239	0.252239	0.482157	0.368097	0.383506	0.34511	0.183789	0.372577	0.209553	0.284603	0.310972
0	0.0889198	0.000547135	0.00423463	0.039703	0.0411263	0.00156228	0.0984114	0.00113432	0.00233692	0.000554796	0.0148081	0.21181	0.0129724	0.000923972	0.04894	0.0667069	0.00369773	0.192141	0.00212682	0.00579233	0.0121186	0.299652	0.108619	0.00159024	0.0452036	0.0122602	0.0239617	0.0148943	0.0018599	0.00428085	0.00260119	0.0124525	0.00621835	0.00459748	0.00506745	0.193957	0.0411257	0.000891609	0.0451874	0.200991	0.00286867	0.0165082	0.000136703	0.0101588	0.302552	0.00527702	7.35016e-05	0.120835	0.0105262
0	0.0716099	0.0344777	0.0204356	0.298819	0.250843	0.162411	0.245971	0.219512	0.203791	0.0409733	0.417616	0.160281	0.280714	0.284967	0.323358	0.265629	0.164557	0.390949	0.157628	0.344372	0.318922	0.239673	0.108416	0.132539	0.251937	0.260007	0.213272	0.35111	0.288083	0.25939	0.190913	0.274563	0.281232	0.322873	0.170291	0.211894	0.132729	0.0939063	0.171619	0.32852	0.385616	0.263329	0.169558	0.17347	0.122548	0.357492	0.41221	0.380247	0.198005
0	0.150362	0.0976576	0.0457276	0.807721	0.462115	0.349757	0.510731	0.567029	0.362	0.0877563	0.706265	0.368145	0.7259	0.520414	0.822758	0.62495	0.267343	0.807363	0.234363	0.60428	0.650275	0.569465	0.230213	0.274127	0.681871	0.716875	0.451172	0.601327	0.570709	0.568518	0.36206	0.48211	0.644183	0.543293	0.346121	0.40484	0.179741	0.135656	0.236034	0.400255	0.862932	0.58425	0.591302	0.0960322	0.381521	0.691286	0.67433	0.512991	0.605937
0	0.163386	0.103262	0.0407509	0.329255	0.530464	0.235136	0.505958	0.414605	0.107649	0.0563406	0.794214	0.393641	0.455138	0.515846	0.714031	0.57169	0.370174	0.6593	0.42884	0.611103	0.906228	0.498	0.115901	0.228085	0.366233	0.448896	0.401219	0.506616	0.439517	0.646352	0.447637	0.560036	0.263528	0.923999	0.185699	0.2814	0.261932	0.142474	0.361233	0.769045	0.774904	0.75339	0.389826	0.180533	0.305593	0.587204	0.972181	0.738253	0.325685
0	0.149835	0.0478071	0.0190004	0.320664	0.422341	0.136948	0.321628	0.181129	0.0380637	0.0332473	0.38711	0.201029	0.164054	0.247488	0.263059	0.182585	0.138103	0.323367	0.0554745	0.150472	0.275902	0.371814	0.12122	0.455053	0.18645	0.20646	0.194274	0.193407	0.268635	0.142877	0.162319	0.210553	0.118525	0.237554	0.10443	0.227229	0.127014	0.0604753	0.139023	0.315953	0.251188	0.288704	0.0552607	0.206257	0.149782	0.21543	0.168642	0.214624	0.181104
0	0.184951	0.0877397	0.0297367	0.530499	0.547353	0.157605	0.430938	0.377175	0.202932	0.0514987	0.51286	0.271437	0.456676	0.457868	0.589834	0.394343	0.250374	0.760324	0.281481	0.548937	0.633957	0.438835	0.17576	0.308851	0.349732	0.432627	0.369312	0.479425	0.419526	0.452071	0.329578	0.373588	0.25007	0.55771	0.198316	0.255243	0.139362	0.10444	0.211222	0.352766	0.44285	0.493127	0.20514	0.241143	0.185869	0.405329	0.681494	0.390245	0.26526
0	0.117638	0.0245216	0.0290897	0.233087	0.185883	0.0835301	0.124193	0.162806	0.0616749	0.0575487	0.0967121	0.106116	0.34477	0.225575	0.182331	0.182693	0.282217	0.0858965	0.447219	0.275268	0.209445	0.142488	0.0999184	0.078908	0.185761	0.310383	0.333857	0.381242	0.169681	0.186536	0.30733	0.395411	0.24295	0.142044	0.0544143	0.110894	0.276839	0.392688	0.294171	0.175872	0.122428	0.189721	0.079109	0.0464177	0.0476722	0.0459562	0.186186	0.243494	0.292963
0	0.128165	0.0298108	0.0297722	0.322336	0.29256	0.0748221	0.158838	0.246889	0.0657954	0.0425934	0.124972	0.166239	0.362731	0.364507	0.287558	0.193174	0.422768	0.176896	0.680861	0.437363	0.418775	0.272172	0.1175	0.122082	0.189381	0.300175	0.443585	0.551884	0.189186	0.308986	0.646602	0.716366	0.159213	0.225741	0.0372724	0.110191	0.583373	0.579477	0.546138	0.39548	0.137293	0.359293	0.0480659	0.0365309	0.0344769	0.0788257	0.233448	0.478719	0.182832
[truncated: 1,106 more rows]
[truncated: 472 more columns]
