# Supplementary material for: Integrating microRNA expression, miRNA-mRNA regulation network and signal pathway: a novel strategy for lung cancer biomarker discovery
Source: PeerJ. 2021 Oct 25;9:e12369. doi: 10.7717/peerj.12369 (PMC8552790; doi:10.7717/peerj.12369)
Supplement: Supplemental Information 10 [file peerj-09-12369-s010.xlsx]

## Sheet: GSE102286 dataset
0 stands for normal tissues and 1 stands for tumor tissues.
sample	hsa-miR-21	hsa-miR-720	hsa-miR-125b	hsa-miR-16	hsa-miR-126	hsa-miR-26a	hsa-miR-451	hsa-miR-92a	hsa-let-7b	hsa-miR-19b	hsa-miR-200b	hsa-miR-142-3p	hsa-let-7i	hsa-miR-200c	hsa-miR-181a	hsa-miR-29a	hsa-miR-103	hsa-miR-30b	hsa-miR-24	hsa-miR-15a	hsa-miR-200a	hsa-let-7a	hsa-let-7d	hsa-miR-199a-3p+hsa-miR-199b-3p	hsa-miR-23a	hsa-miR-125a-5p	hsa-let-7g	hsa-miR-1274a	hsa-let-7c	hsa-miR-10a	hsa-miR-148a	hsa-miR-141	hsa-miR-30a	hsa-miR-15b	hsa-miR-25	hsa-miR-1274b	hsa-miR-30e	hsa-let-7e	hsa-miR-342-3p	hsa-miR-26b	hsa-miR-1260	hsa-miR-23b	hsa-miR-29c	hsa-miR-150	hsa-miR-145	hsa-miR-148b	hsa-miR-223	hsa-miR-100	hsa-miR-222
0	0.0938904	0.570358	0.400971	0.34028	0.413059	0.548739	0.340428	0.405413	0.442987	0.236409	0.132805	0.59376	0.507648	0.210993	0.441354	0.717805	0.207281	0.301104	0.821622	0.268169	0.184948	0.051193	1	0.180408	0.857029	0.522088	0.196479	0.17669	0.181023	0.242408	0.19007	0.301174	0.431006	0.331268	0.150715	0.162189	0.556579	0.336381	1	0.414172	0.148353	0.606534	0.835146	0.124541	0.303713	0.435017	0.374651	0.503362	0.472952
0	0.103365	0.0528187	0.734194	0.584205	1	0.511753	0.749413	0.388551	1	0.124657	0.216738	0.188368	0.260507	0.0987197	0.887273	0.55725	0.00721371	0.354922	0.499949	0.326177	0.237562	0.0909371	0.763079	0.289945	0.648059	0.568777	0.216793	0.00755455	0.23121	0.353986	0.145419	0.0870633	0.997842	0.216432	0.164595	0.0150707	0.286043	0.177988	0.497853	0.560698	0	0.677442	0.40034	0.345278	0.567248	0.179173	0.482791	0.390897	0.365675
0	0.146028	0.0174105	0.518486	0.410671	0.393996	0.261961	0.0919496	0.237155	0.327328	0.143162	0.259909	0.342679	0.214286	0.251911	0.522701	0.486423	0.52119	0.368303	0.48937	0.292936	0.241958	0.254293	0.583156	0.135281	0.734704	0.495988	0.726484	0.00665048	0.23121	0.130568	0.425687	0.179904	0.552431	0.427887	0.21032	0.00302206	0.292799	0.230568	0.382219	0.273466	0.0151678	0.494235	0.948137	0.258906	0.7137	0.487657	0.291015	0.445028	0.209276
0	0.0577102	0.130914	0.676041	0.470966	0.870261	0.501452	0.23832	0.29833	0.954512	0.0832689	0.224756	0.0995267	0.199371	0.148666	0.860023	0.572423	0.26702	0.421989	0.706638	0.200139	0.197403	0.191325	0.859158	0.230751	0.59741	0.742581	0.42748	0.0328066	0.315756	0.316794	0.115065	0.0358443	0.953368	0.184883	0.174472	0.0414115	0.113005	0.168027	0.26695	0.319752	0.0422655	0.711885	0.496076	0.332022	0.908065	0.162498	0.519852	0.408969	0.589465
0	0.188481	0.00998899	0.365881	0.912382	0.424425	0.312902	0.923006	0.250899	0.632572	0.168622	0.12128	0.178028	0.303178	0.128758	0.696648	0.460496	0.491716	0.372794	0.460931	0.337311	0.136797	0.24136	0.808278	0.239484	0.700286	0.237796	0.549004	0	0.321164	0.193489	0.209363	0.0277929	0.461502	0.388638	0.418341	0.000923775	0.142331	0.175865	0.6197	0.257945	0.0153929	0.626244	0.518391	0.444283	0.428509	0.251267	0.251395	0.490922	0.462803
0	0.163342	0.0494595	0.444413	0.592306	0.476527	0.225714	0.272159	0.273853	0.476684	0.12707	0.119329	0.19336	0.355761	0.184238	0.733855	0.327736	0.740363	0.364886	0.732267	0.530311	0.0835165	0.232712	0.647459	0.226918	0.728796	0.471629	0.642302	0.0211404	0.242981	0.105802	0.228483	0.0498999	0.618958	0.500282	0.34094	0.018911	0.118993	0.416068	0.378655	0.0937731	0.0181979	0.461614	0.423222	0.14845	0.685689	0.353605	0.907801	0.405606	0.164924
0	0.204828	0.115875	0.324578	0.493751	0.454941	0.334601	0.291582	0.249287	0.34384	0.190219	0.136738	0.319785	0.216239	0.239765	0.534912	0.451434	0.438176	0.333494	0.329748	0.381206	0.173094	0.198142	0.388875	0.0992235	0.447647	0.226486	0.483985	0.0617987	0.277818	0.115428	0.394668	0.218705	0.545545	0.256526	0.174728	0.0641364	0.389529	0.226486	0.483507	0.359017	0.0772068	0.395634	0.931496	0.144544	0.300117	0.245545	0.473932	0.198874	0.216381
0	0.227032	0.197469	0.20669	0.446599	0.4675	0.381504	0.256657	0.165229	0.371822	0.140515	0.115762	0.389019	0.168469	0.182104	0.635224	0.313813	0.560246	0.370918	0.350981	0.514809	0.129004	0.346883	0.566176	0.0443562	0.476977	0.320735	0.607808	0.0690065	0.206792	0.0472565	0.247921	0.162573	0.515564	0.230986	0.123297	0.0732554	0.446645	0.433867	0.656113	0.459165	0.0536413	0.488568	0.778602	0.126228	0.560496	0.262057	0.427019	0.223544	0.257282
0	0.186656	0	0.298009	1	0.558583	0.252999	0.700671	0.27635	0.405527	0.233364	0.0413415	0.21235	0.294601	0.0722928	0.73783	0.255933	0.391585	0.18989	0.53958	0.570051	0.0123876	0.315105	0.729679	0.153775	0.642761	0.441856	0.635074	0.00849578	0.23972	0.0766605	0.17976	0.00222889	0.421478	0.480751	0.42311	0.0106102	0.115922	0.411822	0.869106	0.277069	0.00531565	0.426481	0.467426	0.268552	0.566307	0.385156	0.590507	0.266118	0.356237
0	0.186738	0.0587088	0.371714	0.517312	0.465179	0.30252	0.208248	0.243673	0.467168	0.0890778	0.218323	0.158321	0.291075	0.256953	0.701647	0.416709	0.636159	0.268024	0.578138	0.43192	0.148718	0.27086	0.586216	0.171438	0.730247	0.363654	0.588343	0.0356798	0.273204	0.0734226	0.3138	0.0769651	0.516679	0.480751	0.280399	0.0350771	0.143098	0.350914	0.557337	0.177846	0.0159123	0.465803	0.587415	0.159131	0.466366	0.499264	0.358457	0.335421	0.243378
0	0.0766693	0.467161	0.516452	0.343902	0.852028	0.440431	0.186902	0.189618	0.760178	0.2384	0.216098	0.323245	0.276684	0.122684	0.796796	0.551275	0.226274	0.337908	0.534214	0.395856	0.275591	0.193183	0.837433	0.23083	0.658404	0.337554	0.67759	0.0892057	0.311382	0.230594	0.242404	0.115811	0.954014	0.38507	0.200954	0.0875079	0.291571	0.351894	0.26896	0.286401	0.0655712	0.418942	0.766074	0.180288	0.409633	0.299493	0.541142	0.358536	0.250482
0	0.334564	0.0799953	0.237262	0.565534	0.491118	0.461938	0.15933	0.291617	0.547424	0.175767	0.158049	0.359165	0.24452	0.217863	0.649934	0.440829	0.385539	0.320336	0.634224	0.523439	0.188678	0.134473	0.334062	0.100132	0.501367	0.363364	0.34839	0.0326332	0.162332	0.0574954	0.134444	0.21593	0.51803	0.175681	0	0.0455553	0.653309	0.198726	0.529788	0.581116	0.0454687	0.463043	0.333065	0.492307	0.391551	0.124898	0.262685	0.175633	0.317861
0	0.126012	0.105027	0.699215	0.481281	0.57314	0.471148	0.237724	0.311472	0.690964	0.0569648	0.0575915	0.174588	0.186267	0.115181	0.60863	0.434035	0.586734	0.382215	0.534061	0.161837	0.0721279	0.195088	0.50231	0.238437	0.733274	0.509232	0.391727	0.0425903	0.427583	0.341472	0.19732	0.0321598	0.472852	0.0937089	0.129768	0.0557564	0.0640258	0.381123	0.583151	0.210643	0.0729646	0.716123	0.372305	0.242602	0.807433	0.107079	0.439408	0.515718	0.39521
0	0.148514	0.00134498	0.444986	0.683193	0.623839	0.28882	0.401167	0.258107	0.470567	0.259715	0.107409	0.2083	0.224483	0.0267786	0.472832	0.502741	0.258792	0.263491	0.515689	0.325804	0.111622	0.144726	0.277625	0.234307	0.726441	0.307202	0.460332	0.0066381	0.310109	0.208891	0.338985	0.125318	0.783285	0.134742	0.240719	0	0.323353	0.144024	0.42489	0.319383	0.0045538	0.526806	0.771795	0.331252	0.625967	0.317639	0.396173	0.357695	0.280524
0	0.21065	0.139931	0.291353	0.385035	0.396112	0.307824	0.243399	0.225058	0.277909	0.127281	0.259878	0.367835	0.144835	0.240796	0.630184	0.387527	0.57704	0.337538	0.419971	0.284946	0.309224	0.223626	0.5334	0.0573568	0.369917	0.263896	0.556039	0.0494638	0.219677	0.0806861	0.2141	0.153157	0.531068	0.328263	0.236291	0.0478516	0.295102	0.169007	0.88665	0.259608	0.0421096	0.419779	1	0.181974	0.351812	0.277751	0.206152	0.306758	0.164011
0	0.0769	0.173008	0.437791	0.622604	0.454556	0.335467	0.389051	0.182692	0.687183	0.0952849	0.15814	0.115654	0.215596	0.149909	0.550033	0.375	0.458296	0.343082	0.48891	0.244993	0.0735265	0.32067	0.618679	0.128011	0.712375	0.380667	0.631297	0.0611423	0.365545	0.16356	0.230072	0.0373453	0.507987	0.480188	0.301601	0.0591084	0.130662	0.485467	0.249223	0.209996	0.0888943	0.526067	0.462651	0.216002	0.706551	0.255681	0.517188	0.359923	0.312697
0	0.162071	0.151374	0.371819	0.737858	0.414594	0.361805	0.572416	0.349144	0.472845	0.259035	0.150579	0.313488	0.239445	0.224054	0.513768	0.435463	0.397543	0.377612	0.298498	0.450298	0.150716	0.208311	0.487889	0.150317	0.296918	0.359497	0.568988	0.0643376	0.271137	0.151658	0.343346	0.15998	0.486844	0.391643	0.229905	0.0608768	0.262552	0.25	0.196637	0.312361	0.0608443	0.351335	0.684663	0.185407	0.310485	0.209253	0.294524	0.245356	0.352481
0	0.232453	0.140037	0.54841	0.49779	0.366296	0.274139	0.37178	0.135403	0.518529	0.196121	0.101006	0.448682	0.323954	0.0406603	0.347238	0.456034	0.265047	0.179089	0.375664	0.415033	0.137329	0.243498	0.578662	0.251358	0.524431	0.22378	0.641481	0.206722	0.366977	0.159797	0.308514	0.0820597	0.410334	0.475211	0.369295	0.230112	0.344542	0.456074	0.23072	0.214246	0.148578	0.323889	0.771558	0.304	0.374263	0.376982	0.287188	0.377112	0.20207
0	0.126507	0.211671	0.420638	0.981607	0.743315	0.370307	0.952635	0.467172	0.63855	0.347739	0.239512	0.135466	0.334652	0.192234	0.462506	0.531649	0.177412	0.493198	0.443402	0.301726	0.245221	0.0487276	0.546635	0.170885	0.31973	0.392847	0.391207	0.0738117	0.112225	0.309618	0.0343981	0.0786936	1	0.400282	0.287381	0.0652053	0.301858	0.106956	0.209841	0.528271	0.0848599	0.503154	0.40573	0.270979	0.406748	0.139774	0.306089	0.244053	0.317861
0	0.236236	0.13949	0.712452	0.640491	0.337335	0.386557	0.452388	0.277962	0.602659	0.0879535	0.100976	0.237134	0.279734	0.0666417	0.505204	0.426411	0.429835	0.230139	0.686427	0.263904	0.0739261	0.15554	0.489137	0.150147	1	0.304108	0.336454	0.0501573	0.276863	0.200753	0.13404	0.00982533	0.363672	0.244977	0.21296	0.0653373	0.137264	0.123122	0.542306	0.183574	0.0600997	0.756036	0.233595	0.570837	0.543689	0.200262	0.655159	0.342229	0.331168
0	0.0759622	0.320395	0.661114	0.465278	0.578646	0.422476	0.165555	0.383362	0.804602	0.163774	0.207378	0.178989	0.155913	0.149299	0.779831	0.566952	0.610685	0.44977	0.5544	0.199925	0.188944	0.191866	0.661069	0.15903	0.739035	0.369937	0.343682	0.0899735	0.245844	0.245646	0.128379	0.0437591	0.901671	0.236808	0.190906	0.0956107	0.113312	0.330503	0.361888	0.140798	0.114659	0.577067	0.49253	0.217481	0.743802	0.0405428	0.378724	0.429226	0.39592
0	0.0153116	0.0422276	0.169747	0.379727	0.581343	0.894076	0.354452	0.261703	0.650101	0.229077	0.0868293	0.0234383	0.0404317	0.126811	0.650754	0.173251	0.481797	0.970037	0.633662	0.23583	0.0614053	0.595163	0.305843	0.195187	0.588285	0.598163	0.0737516	0.0749882	0.622127	0.385753	0.0935189	0.114674	0.388662	0.0153991	0.141689	0.123628	0.480424	0.633246	0.156661	1	0.0621083	0.822115	0.13039	0.268286	0.851373	0.015694	0.509112	0.267841	0.577895
0	0.0615317	0.329157	0.0854052	0.354092	0.371203	0.404913	0.318118	0.08443	0.233254	0.225447	0.0521951	0.154497	0.0679501	0.118511	0.086912	0.196174	0.218215	0.480402	0.24489	0.370392	0.0576757	0.394388	0.147834	0.117302	0.225874	0.135621	0.549989	0.259418	0.280681	0.0960882	0.144726	0.229667	0.337361	0.39061	0.212108	0.30313	0.658529	0.472894	0.0562409	0.480229	0.268345	0.258106	0.804747	0.166588	0.192149	0.14615	0.39926	0.222829	0.28641
0	0.00147819	0.145995	0.0513729	0.207879	0.187593	0.498476	0.285957	0.0716955	0.320819	0.022369	0.121585	0.015862	0.0392643	0.168715	0.395673	0.0563256	0.332563	0.516983	0.255008	0.0938099	0.0929737	0.792865	0.352104	0.0502243	0.19196	0.333301	0.538847	0.238674	0.646147	0.151308	0.0950786	0.115584	0.159071	0.35446	0.249319	0.30123	0.334255	0.899412	0.0792215	0.469882	0.201596	0.468316	0.375425	0.187862	0.721686	0.181952	0.577822	0.33996	0.364661
0	0.051099	0.203491	0.0636287	0.358497	0.231754	0.501064	0.275158	0.110926	0.242805	0.165882	0.0872561	0.0703548	0.069046	0.209398	0.253852	0.199639	0.48546	0.577209	0.307901	0.347592	0.0532135	0.633982	0.265451	0.0815008	0.30251	0.167617	0.565402	0.12891	0.415891	0.124967	0.179211	0.226437	0.235655	0.220563	0.135133	0.137339	0.452633	0.350588	0.247487	0.616316	0.154569	0.388292	0.582782	0.195319	0.276328	0.182442	0.370317	0.267967	0.231097
0	0.122621	0.0652435	0.672809	0.56137	0.534676	0.407497	0.351393	0.294345	0.533572	0.111072	0.10186	0.231513	0.238874	0.0992121	0.485371	0.414987	0.373028	0.331911	0.378398	0.385628	0.12028	0.206696	0.451992	0.261751	0.672995	0.330111	0.510896	0.0225522	0.478008	0.190514	0.156192	0.0413483	0.534108	0.171174	0.143052	0.0317647	0.130508	0.275147	0.253244	0.337029	0.0535894	0.649847	0.458113	0.385105	0.978615	0.158084	0.295455	0.481172	0.227849
0	0.155214	0.10208	0.779681	0.531783	0.402024	0.348374	0.327411	0.501213	0.590056	0.124166	0.122226	0.201552	0.306442	0.251723	1	0.534568	0.825575	0.426884	0.630494	0.229118	0.25308	0.14284	0.771382	0.104104	0.598188	0.497922	0.37396	0.0402125	0.333413	0.139494	0.309092	0.0958879	0.771319	0.208169	0.183839	0.0406461	0.237064	0.116427	0.280507	0.201497	0.142276	0.476496	0.711233	0.262753	0.779819	0.288867	0.279746	0.434059	0.206029
0	0.125004	0.281551	0.450041	0.714165	0.669159	0.243072	1	0.299109	0.431138	0.220294	0.158171	0.376021	0.400743	0.141326	0.522168	0.527407	0.274572	0.267536	0.387546	0.813019	0.194472	0.266713	0.98252	0.24385	0.751966	0.227163	0.919377	0.0437173	0.228346	0.200665	0.266578	0.088337	0.644594	0.571268	0.565906	0.0484454	0.247351	0.281189	0.319901	0.233555	0.0308031	0.387701	0.973383	0.116375	0.222166	0.501063	0.628372	0.304531	0.236375
0	0.0225317	0.0990929	0.104505	0.336014	0.202085	0.497371	0.46558	0.0973415	0.34458	0.121425	0.0505488	0.0299541	0.0525827	0.0817662	0.203368	0.121167	0.352795	0.454665	0.314851	0.212924	0	0.722669	0.312211	0.160611	0.362684	0.349734	0.486942	0.105231	0.581007	0.174499	0.115382	0.0687318	0.168453	0.183005	0.193546	0.139226	0.325503	0.606956	0.047606	0.590447	0.109828	0.552183	0.372542	0.186176	1	0.0908942	0.372452	0.384088	0.27484
0	0	0.156066	0.0545932	0.218795	0.411463	0.888836	0.118925	0.0855281	0.473654	0.0908814	0.218262	0.00806687	0.0106023	0.223374	0.522455	0.190902	0.258735	1	0.376635	0	0.247752	0.389522	0.205332	0.117677	0.314116	0.513098	0	0.208221	0.470771	0.138619	0.115209	0.2379	0.199507	0.063662	0.0332936	0.377679	0.785813	0.496571	0.114035	0.439897	0.168352	0.650291	0.179888	0.258137	0.708161	0.0214157	0.226681	0.234429	0.566528
0	0.0210706	0.0414085	0.262563	0.259231	0.270974	0.900412	0.0723913	0.217336	0.494664	0.0627738	0.160366	0.0119512	0.0587535	0.213643	0.54319	0.281218	0.346709	0.828079	0.650118	0.0442681	0.187612	0.867507	0.518105	0.197657	0.375194	0.691058	0.223609	0.0363114	0.50163	0.264199	0.109519	0.0922944	0.374126	0.0902347	0.241911	0.0762906	0.473975	0.297518	0.2108	0.667221	0.0471482	0.624421	0.191424	0.374896	0.602429	0.193068	0.324313	0.348869	0.504516
0	0.0168091	0.102058	0.0175042	0.477989	0.269872	0.463235	0.991742	0.120083	0.281725	0.134823	0.0620732	0.0269249	0.0292576	0.0811799	0.388994	0.0594758	0.328674	0.612807	0.276804	0.229597	0.0237762	0.837391	0.409727	0.0194812	0.232076	0.344611	0.582539	0.154621	0.431798	0.0829614	0.0623845	0.0904294	0.210049	0.535869	0.458447	0.208457	0.369722	0.786577	0.176901	0.589893	0.152111	0.398492	0.438587	0.286691	0.443288	0.190126	0.49518	0.193914	0.289151
0	0.0100963	0.0577034	0.0979825	0.874204	0.389475	0.653451	0.372089	0.394892	0.562803	0.196191	0.129329	0.00631032	0.123916	0.15638	0.272537	0.166635	0.48963	0.854619	0.367053	0.222512	0.0600733	0.967521	0.582532	0.146958	0.348892	0.365491	0.856412	0.0644738	0.682335	0.248009	0.0811576	0	0.288366	0.617277	0.225529	0.0664722	0.247505	0.536414	0.0660179	0.718681	0.0784015	0.538041	0.44601	0.323441	0.669677	0.192905	0.38222	0.288224	0.628743
0	0.0156043	0.0750735	0.067264	0.336468	0.263181	0.549199	0.474835	0.132463	0.400913	0.0640386	0.132683	0.0112817	0.0231821	0.157952	0.267784	0.0826193	0.424087	0.616244	0.278082	0.135574	0.0451548	0.903404	0.491135	0.0983147	0.303646	0.37129	0.615719	0.13218	0.561759	0.166185	0.0723487	0.0548126	0.236375	0.495587	0.293852	0.112489	0.129894	0.974363	0.0754751	0.497506	0.113776	0.46329	0.376844	0.218428	0.680735	0.190126	0.225201	0.275237	0.30275
0	0.0701915	0.0408891	0.101185	0.452737	0.200989	0.394999	0.372089	0.516923	0.299636	0.148843	0.0648171	0.117894	0.232846	0.132838	0.169317	0.129862	0.651995	0.405811	0.289682	0.268169	0.0225774	0.475286	0.308278	0.0400885	0.190362	0.169937	0.752327	0.048634	0.220711	0.0855868	0.0971869	0.0668213	0.205438	0.760469	0.225529	0.0529851	0.533241	0.167538	0.136102	0.741685	0.0758908	0.220607	0.282054	0.458131	0.196915	0.118032	0.734884	0.195638	0.243378
0	0.0749668	0.0540672	0.0978247	0.182661	0.254486	0.500731	0.305148	0.19401	0.379476	0.121659	0.104604	0.0856135	0.14848	0.230573	0.472955	0.151294	0.673693	0.740818	0.479201	0.247709	0.126007	0.769137	0.444687	0.0815601	0.240696	0.281972	0.632638	0.100451	0.511891	0.221755	0.175572	0.101953	0.279996	0.0676056	0.125255	0.143238	0.671733	0.606303	0.41292	0.656596	0.263583	0.545136	0.530872	0.140727	0.533279	0.137322	0.205751	0.432672	0.314219
0	0.136574	0.191536	0.346109	0.716313	0.711973	0.301846	0.458521	0.234852	0.425357	0.297168	0.11497	0.34549	0.302749	0.134268	0.655671	0.368007	0.470694	0.36845	0.623927	0.75032	0.130536	0.153	0.559308	0.155	0.722005	0.229096	0.523407	0.070245	0.135608	0.141682	0.217219	0.169396	0.739546	0.190798	0.166383	0.0655749	0.279288	0.372632	0.441658	0.262472	0.0564983	0.554154	0.693362	0.072908	0.520925	0.181135	0.401607	0.308901	0.157312
0	0.125071	0.582958	0.2714	0.538256	0.650928	0.339799	0.592728	0.192575	0.462184	0.215469	0.18436	0.40685	0.184575	0.12388	0.584003	0.422369	0.161181	0.405281	0.355529	0.507564	0.206993	0.215259	0.47971	0.132871	0.328498	0.17448	0.453323	0.138719	0.201225	0.104839	0.186691	0.22066	0.914151	0.368075	0.174898	0.142657	0.515891	0.428478	0.275082	0.325573	0.0867992	0.407559	0.881382	0.164605	0.454994	0.175576	0.173023	0.217618	0.211814
0	0.0954478	0.104218	0.682651	0.527223	0.52288	0.315	0.281728	0.290856	0.628641	0.147893	0.146829	0.165639	0.219432	0.187638	0.604655	0.464613	0.540633	0.410135	0.612352	0.117089	0.112421	0.323556	0.861094	0.210559	0.772045	0.472982	0.627628	0.0188245	0.335163	0.16391	0.211501	0.0494905	0.475994	0.371643	0.253406	0.0301415	0.0499002	0.297028	0.32013	0.213415	0.0580566	0.622253	0.552856	0.387354	0.721832	0.320092	0.53315	0.521392	0.23333
0	0.347959	0.294897	0.343029	0.48639	0.692338	0.158754	0.166531	0.0433042	0.418685	0.340056	0.149817	0.142939	0.361932	0.0587628	0.206114	0.62731	0.28156	0.313439	0.518781	0.578148	0.174492	0.234104	0.957735	0.227768	0.526197	0.017883	0.889893	0.060746	0.187465	0.166448	0.37422	0.188364	0.986228	0.311549	0.342047	0.037756	0.444342	0.310091	0.807155	0.189579	0.0695017	0.185227	0.49112	0.055835	0.159162	0.37878	0.344736	0.405438	0.167056
0	0.0195326	0.0830476	0.236315	0.445741	0.408696	0.789495	0.361354	0.174297	0.421252	0.139344	0.16311	0.0280518	0.0567045	0.25449	0.372644	0.257476	0.35009	0.833595	0.292467	0.112561	0.0695971	0.739338	0.447247	0.102246	0.477608	0.467666	0.56261	0.0836574	0.552533	0.23952	0.0662257	0.0466703	0.39477	0.304319	0.214407	0.0681218	0.242745	0.599608	0.0921053	0.614375	0.0534335	0.421602	0.258463	0.341816	0.517977	0.069315	0.412579	0.268471	0.538922
0	0.125235	0.411537	0.142523	0.213876	0.181869	0.463316	0.0923292	0.120968	0.357715	0.0946759	0.0748171	0.091904	0.23611	0.148056	0.338879	0.154066	0.606797	0.293008	0.303097	0.291019	0.0610723	0.70558	0.331689	0.258886	0.196901	0.330498	0.781099	0.338011	0.541955	0.169861	0.307475	0.15766	0.14267	0.25831	0.194993	0.337218	0.422232	0.753429	0.0777595	0.385255	0.0945791	0.423327	0.515412	0.404219	0.543773	0.274644	0.192114	0.542994	0.33198
0	0.0349115	0.146702	0.107158	0.162985	0.158306	0.472978	0.134276	0.0710756	0.352396	0.0765465	0.163872	0.0324266	0.0332603	0.151573	0.188166	0.136299	0.272712	0.308426	0.346944	0.0978585	0.109357	0.708456	0.218317	0.174659	0.338905	0.360947	0.542324	0.145295	0.579655	0.18465	0.144235	0.172535	0.104936	0.17831	0.201294	0.160315	0.452787	0.385532	0.0507127	0.471822	0.113499	0.528777	0.497258	0.241419	0.516744	0.128494	0.151268	0.338867	0.289049
0	0.0520527	0.0940479	0.124914	0.466964	0.339336	0.586286	0.459823	0.196596	0.350315	0.182887	0.186768	0.0360059	0.0204899	0.149838	0.174357	0.199912	0.47278	0.578904	0.382206	0.199339	0.0757243	0.559873	0.172618	0.12315	0.395463	0.314451	0.399255	0.127858	0.445399	0.1801	0.0350046	0.116812	0.321739	0.0957746	0.138454	0.132918	0.322739	0.218485	0.126142	0.640891	0.12174	0.429388	0.210524	0.224997	0.513253	0.0338401	0.221945	0.190636	0.383437
0	0.0301555	0.110547	0.196526	0.365271	0.304744	0.597287	0.270942	0.192947	0.399815	0.168318	0.110701	0.0210189	0.0117221	0.112039	0.270693	0.179404	0.38537	0.416696	0.398124	0.0979118	0.0689977	0.586058	0.279498	0.177464	0.519175	0.341228	0.415407	0.103213	0.461306	0.265336	0.112639	0.0434407	0.277941	0.046385	0.201294	0.113638	0.251036	0.378837	0.14958	0.422579	0.156093	0.656697	0.260023	0.184756	0.873866	0.0720942	0.464186	0.295999	0.430732
0	0.0970542	0.0391016	0.194703	0.271466	0.178104	0.340016	0.407294	0.158959	0.366919	0.118661	0.0909146	0.0388297	0.181955	0.0727618	0.212547	0.161227	0.236925	0.314157	0.455207	0.143618	0.0654679	0.54862	0.238419	0.356094	0.32116	0.21334	0.502601	0.0444109	0.79114	0.172749	0.259155	0.0804676	0.167484	0.140469	0.273842	0.0609824	0.415016	0.258654	0.11134	0.399852	0.0624026	0.463585	0.581978	0.228429	0.369288	0.262057	0.236702	0.340086	0.293515
0	0.0149442	0.0896539	0.0336583	0.217468	0.285314	0.466283	0.268896	0.103169	0.268093	0.0666151	0.0844817	0.0177047	0	0.128054	0.259957	0.0753948	0.296156	0.545475	0.321699	0.0945025	0.0488844	0.762572	0.291297	0.0406022	0.278458	0.313291	0.529265	0.221856	0.407063	0.146495	0.0649838	0.129685	0.21579	0.380094	0.171322	0.214619	0.278673	0.651045	0.0845212	0.660846	0.155089	0.407313	0.482791	0.114185	0.410092	0.194703	0.214101	0.24254	0.419872
0	0.0179807	0.0957116	0.175188	0.516982	0.607937	1	0.311815	0.309151	0.719489	0.170707	0.14814	0.0160873	0.0370009	0.190545	0.726029	0.255156	0.492674	0.873348	0.531071	0.245685	0.0829171	0.578606	0.354414	0.172801	0.422375	0.516481	0.127436	0.117096	0.440388	0.199177	0.0915261	0.0853348	0.461077	0.130235	0.178559	0.162228	0.396438	0.537557	0.136924	0.834534	0.0605845	0.786883	0.109871	0.367085	0.634119	0.0951447	0.471268	0.289401	0.483609
0	0.0087164	0.0601242	0.118625	0.456884	0.242301	0.624581	0.549059	0.131223	0.38587	0.119926	0.130518	0.00745705	0.0329982	0.152089	0.192059	0.185841	0.255523	0.692383	0.25276	0.187726	0.0751915	0.940132	0.476589	0.181574	0.311362	0.356017	0.479495	0.0683625	0.691084	0.234445	0.0955118	0.0370269	0.223792	0.198685	0.244295	0.0858583	0.172424	0.577727	0.0477887	0.668145	0.0550438	0.558096	0.25312	0.239614	0.558385	0.0639202	0.225412	0.275994	0.482696
0	0.0202439	0.0814302	0.0708759	0.399689	0.300333	0.681099	0.423621	0.144064	0.322137	0.110276	0.0546951	0.0338384	0.0719527	0.114712	0.246066	0.186555	0.365363	0.576888	0.380315	0.257564	0.0179154	1	0.455862	0.125699	0.360918	0.40754	0.747125	0.15846	0.497972	0.205478	0.140278	0.0289301	0.220429	0.264601	0.229394	0.155339	0.304622	0.5516	0.0942526	0.812546	0.0814143	0.454174	0.471445	0.420316	0.430265	0.0738924	0.480825	0.212364	0.324165
0	0.0418752	0.0948371	0.17261	0.40139	0.248137	0.593885	0.316098	0.161864	0.352408	0.143583	0.0907317	0.0297288	0.047484	0.120269	0.200049	0.237683	0.347216	0.512813	0.403848	0.208609	0.0468864	0.760022	0.314771	0.226464	0.520058	0.396037	0.417789	0.0892923	0.633182	0.212129	0.124856	0.0430768	0.229503	0.0757746	0.11095	0.106709	0.302472	0.47224	0.11271	0.697894	0.104616	0.530797	0.224234	0.217511	0.461788	0.0302436	0.296258	0.312516	0.336243
0	0.0888804	0.0808952	0.0965331	0.478634	0.257232	0.361963	0.446358	0.126583	0.190958	0.176657	0.0717378	0.0538896	0.0944201	0.126085	0.212465	0.148732	0.401375	0.257194	0.374821	0.367462	0.0504829	0.558846	0.154576	0.110288	0.308881	0.276945	0.468353	0.0935155	0.34423	0.104752	0.148683	0.111581	0.174209	0.370892	0.372105	0.0829418	0.223399	0.348302	0.120842	0.365576	0.0889116	0.43811	0.341481	0.244408	0.427484	0.21383	0.684863	0.334622	0.25647
0	0.0715213	0.134622	0.0159788	0.286223	0.289366	0.452848	0.147569	0.198828	0.149494	0.19057	0.0579573	0.0154444	0.1577	0.307555	0.295116	0.224389	0.977401	0.578004	0.408371	0.27589	0.00592741	0.619265	0.284118	0.075534	0.168727	0.480039	0.527048	0.092039	0.382804	0.302879	0.172046	0.132915	0.176573	0.232019	0.314373	0.195458	0.284354	0.733508	0.00913743	0.377772	0.235724	0.324431	0.236006	0.227897	0.286362	0.275789	0.0763425	0.0730436	0.497919
0	0.0476908	0.12701	0.0954927	0.262362	0.402992	0.643738	0.450562	0.128815	0.351494	0.150657	0.153354	0.0362512	0.225984	0.168175	0.297656	0.283256	0.393598	0.627004	0.298114	0.367302	0.120946	0.652799	0.517231	0.123447	0.336235	0.138134	0.45962	0.0847596	0.454943	0.191301	0.119166	0.0688683	0.317055	0.486948	0.365378	0.171809	0.486412	0.639941	0.278783	0.677661	0.0723759	0.455701	0.384455	0.150166	0.189974	0.212196	0.477125	0.290115	0.31767
0	0.013088	0.175156	0.00170074	0.340977	0.300981	0.546978	0.501029	0.076637	0.298607	0.108636	0.0682927	0.0243398	0.0758124	0.161727	0.420587	0.134503	0.368463	0.547643	0.258458	0.32916	0.0544789	0.811514	0.257585	0.0309802	0.24179	0.313195	0.529156	0.183427	0.53591	0.101776	0.0530268	0.144833	0.162316	0.169014	0.175238	0.301111	0.491939	0.746244	0.234375	0.824926	0.191294	0.442594	0.399726	0.292727	0.49168	0.1128	0.186004	0.214592	0.256267
0	0.0348635	0.0608306	0.0728922	0.48749	0.351669	0.454067	0.7031	0.0939409	0.262878	0.172581	0.109207	0.0486001	0.0615887	0.127491	0.179848	0.166436	0.420649	0.606252	0.358493	0.271788	0.0644023	0.672438	0.49588	0.0577322	0.269396	0.203577	0.820001	0.0573527	0.309155	0.10589	0.163875	0.131459	0.379368	0.497371	0.384366	0.0886824	0.393214	0.649086	0.19449	0.547949	0.117169	0.362373	0.633652	0.154012	0.220055	0.210724	0.580951	0.28793	0.279103
0	0.00223224	0.118389	0.146661	0.247993	0.284493	0.775535	0.117814	0.157897	0.442724	0.060736	0.226037	0.00571376	0.0162728	0.210852	0.51299	0.181158	0.270401	0.633851	0.19261	0.0308438	0.0642691	0.795667	0.348795	0.1044	0.359152	0.382697	0.708415	0.108501	0.50688	0.179837	0.0891	0.0560862	0.273536	0.456808	0.260559	0.0925359	0.272532	0.586871	0.114355	0.447247	0.0602383	0.607372	0.431212	0.336312	0.774802	0.185712	0.193573	0.360217	0.404445
0	0.0339257	0.209094	0.182079	0.327048	0.391035	0.406763	0.204486	0.053506	0.400416	0.14972	0.117226	0.0320156	0.112742	0.0603105	0.147066	0.279307	0.264766	0.644925	0.417314	0.123908	0.0813187	0.662362	0.5663	0.218501	0.413608	0.182407	0.852634	0.147091	0.437048	0.151221	0.172366	0.0509916	0.47733	0.301784	0.381557	0.222656	0.416091	0.618387	0.140534	0.378049	0.241905	0.266335	0.638474	0.0539413	0.100422	0.188655	0.21666	0.39884	0.33878
0	0.0587943	0.147348	0.0468142	0.263813	0.116135	0.320134	0.753746	0.0663998	0.317049	0.131778	0.0659451	0.0468899	0.144858	0.00776157	0.0860515	0.178963	0.158927	0.187659	0.175797	0.151769	0.107959	0.650857	0.226308	0.192164	0.152033	0.0189464	0.656373	0.139487	0.753281	0.103789	0.234866	0.0783297	0.0833089	0.2123	0.427112	0.248113	0.509596	0.918354	0.067754	0.688378	0.274925	0.429388	0.50695	0.170701	0.303692	0.0457741	0.552199	0.460788	0.274231
1	0.463056	0.168827	0.599584	0.642294	0.11591	0.211626	0.18661	0.906272	0.304111	0.70658	1	0.195196	0.512079	0.599916	0.82048	0.0849924	0.599696	0.0479607	0.177739	0.546612	1	0	0.448058	0.169739	0.119591	0.358142	0.117718	0.155091	0.909966	0.973046	0.250722	0.483306	0.120236	0.738498	0.618273	0.0724504	0.879165	0.735304	0.226928	0.428307	0.062039	0.177392	0.0822144	0.0141733	0.0173293	0.444335	0.022981	0.0559805	0.132853
1	0.591978	0.227772	0.649753	0.463628	0.0982999	0.361097	0.0857188	0.508386	0.632491	0.25927	0.104299	0.276675	0.610764	0.146626	0.868546	0.630502	0.171156	0.0797439	0.507487	0.483433	0.172761	0.0404538	0.332813	0.430028	0.344729	0.470082	0.30927	0.122384	0.167979	0.242146	0.311287	0.15111	0.237902	0.0980282	0.121424	0.126729	0.619837	0.138145	0.177154	0.435144	0.0688437	0.455948	0.280257	0.296506	0.160166	0.137976	0.736342	0.520341	0.592611
1	0.903665	0.221698	0.347383	0.373672	0.237076	0.280258	0.0331242	0.758718	0.354027	0.405195	0.27747	0.634625	0.783499	0.206702	0.613137	0.866851	0.39557	0.103041	0.920482	0.477573	0.324276	0.00415558	0.461418	0.290637	0.550713	0.476559	0.396956	0.0925123	0.0326891	0.412269	0.343143	0.233079	0.2352	0.0856338	0.154632	0.0756968	0.24904	0.0669497	0.441155	0.306541	0.0911106	0.372327	0.452439	0.410847	0.183871	0.273991	0.14685	0.243591	0.695829
1	0.447534	0.347914	0.290078	0.34668	0.0676882	0.304387	0.00893832	0.335329	0.705186	0.254913	0.760579	0.495983	1	0.877175	0.303913	0.430832	0.468271	0.284424	0.569987	0.332303	0.932201	0.270841	0.313099	0.100646	0.209663	0.416336	0.712139	0.0844748	0.536308	0.0840116	0.31379	0.67863	0.343866	0.579718	0.478287	0.114997	0.731614	0.441868	0.315424	0.190041	0.126727	0.285848	0.61909	0.306249	0.0293491	0.278912	0.0608879	0.230562	0.106364
1	0.701944	0.213588	0.237706	0.808813	0.127008	0.18432	0.360221	0.433166	0.13141	0.458436	0.0315244	0.726422	0.481821	1	0.381085	0.656155	1	0.0991918	0.590709	0.651023	0.0194472	0.148508	0.553377	0.12236	0.722299	0.152924	0.612489	0.181743	0.042631	0.157784	0.299965	0.321643	0.101075	0.860188	0.902844	0.0840372	0.360356	0.0664598	0.30455	0.268385	0.195883	0.168227	0.279737	0.218576	0.114846	0.417198	0.216726	0.258763	0.251091
1	0.722528	0.286959	0.736543	0.376758	0.0929989	0.18351	0.0674311	0.174722	0.365728	0.165648	0.0518598	0.648293	0.792219	0.0785771	0.448041	0.558688	0.649177	0.0678758	0.481296	0.519124	0.101232	0.209581	0.612873	1	0.707582	0.220493	0.677836	0.0657122	0.242106	0.186051	0.850566	0.0400291	0.154431	0.320657	0.212023	0.0697582	0.171657	0.233344	0.404514	0.0538618	0.0871974	0.236129	0.601362	0.271304	0.303922	0.422266	0.463066	0.747794	0.0498325
1	0.425489	0.188212	0.373835	0.479507	0.197345	0.20109	0.259123	0.268929	0.277898	0.236128	0.123354	0.514536	0.471815	0.202434	0.498238	0.53166	0.457901	0.13822	0.289938	0.397454	0.127939	0.145959	0.426395	0.181218	0.365628	0.292895	0.579172	0.0844624	0.252923	0.0612584	0.577778	0.168987	0.215173	0.456526	0.43171	0.0883261	0.260863	0.0831156	0.157392	0.154933	0.0896734	0.172662	0.684049	0.328441	0.172102	0.310773	1	0.333109	0.12585
1	0.731814	0.430597	0.321393	0.202872	0.0961403	0.232583	0.00722846	0.357928	0.310042	0.344951	0.377927	0.655537	0.594992	0.360362	0.353344	0.498519	0.406842	0.0495924	0.413686	0.124707	0.355711	0.148956	0.573605	0.491079	0.418948	0.245529	0.694098	0.184888	0.180148	0.176074	0.325555	0.238401	0.0814882	0.218967	0.584298	0.200077	0.268847	0.359242	0.235289	0.320214	0.194238	0.440327	0.498345	0.41934	0.26504	0.3487	0.0841226	0.369043	0.208058
1	0.745367	0.0602676	0.437213	0.77795	0.0813562	0.132765	0.177762	0.663219	0.698295	0.466376	0.713902	0.245619	0.486896	0.195282	0.146943	0.296738	0.689811	0.0421452	0.427509	0.628969	0.514952	0.331148	0.435885	0.663446	0.46022	0.200773	0.564772	0.0683997	0.249582	1	0.366567	0.0852438	0.0803136	0.47061	0.776737	0.0270006	0.157992	0.0893207	0.159859	0.0919254	0.0396509	0.308958	0.232508	0.214374	0.0768427	0.362106	0.0707188	0.216651	0.627829
1	0.307018	0.145338	0.255602	0.307908	0.14722	0.190984	0.0166844	0.429837	0.151841	0.236948	0.906067	0.274718	0.214119	0.675749	0.427594	0.285618	0.789563	0.239371	1	0.250959	0.89324	0.173003	0.126108	0.178274	0.231151	0.411213	0.381187	0.103175	0.124553	0.112103	0.313424	0.295351	0.267898	0.286667	0.57936	0.10436	0.334869	0.306989	0.275585	0.32197	0.0670603	0.733468	0.443079	0.232158	0.245934	0.70067	0.0804651	0.211818	0.162184
1	0.442792	1	0.14527	0.539993	0.0726538	0.327271	0.0551829	0.729123	0.318529	0.458412	0.605976	0.574637	0.391499	0.865732	0.303913	0.652932	0.648783	0.568054	0.476441	0.994353	0.758442	0.104879	0.656449	0.0621975	0.249148	0.699372	0.771764	0.291556	0.0316551	0.0263411	0.31379	0.823099	0.1112	0.236526	0.239271	0.364786	0.399509	0.336218	0.361979	0.233463	0.267358	0.258007	0.876324	0.203634	0.162402	0.526892	0.41685	0	0.412971
1	0.630928	0.138752	0.482601	0.41361	0.109133	0.336891	0.0189245	0.430651	0.303001	0.238423	0.136982	0.468839	0.522563	0.218661	0.670054	0.585591	0.973907	0.158993	0.670176	0.368421	0.0921745	0.0917869	0.247534	0.471954	0.673458	0.407733	0.506926	0.093565	0.0955222	0.146408	0.477183	0.101301	0.143478	0.135399	0.124234	0.0983293	0.294795	0.151862	0.472816	0.233925	0.151851	0.443579	0.457876	0.556841	0.245474	0.197482	0.161903	0.333109	0.305592
1	0.703406	0.346188	0.207566	0.399916	0.131215	0.243047	0.0157432	0.456156	0.131248	0.441993	0.687683	0.609337	0.53245	0.757703	0.266923	0.20386	0.359671	0.0479538	0.328061	0.358087	0.6	0.132185	0.392371	0.26021	0.231025	0.455002	0.512511	0.195106	0.13179	0.25509	0.3311	0.463201	0.0881541	0.23662	0.133345	0.143885	0.505758	0.613325	0.189556	0.359202	0.2244	0.429733	0.21979	0.486951	0.148627	0.14288	0.180148	0.176095	0.349538
1	0.770809	0.198278	0.646515	0.41136	0.143821	0.416651	0.0224791	0.24029	0.546742	0.197925	0.0442988	0.345974	0.798699	0.0549172	0.369653	1	0.546495	0.0639221	0.812781	0.204187	0.0227772	0.141635	0.310089	0.974888	0.873491	0.4261	0.59067	0.149444	0.199952	0.199965	0.315099	0.0379822	0.0787573	0.129484	0.197463	0.0997149	0.215722	0.294742	0.557246	0.330007	0.0874745	0.683108	0.360911	0.277193	0.357373	0.296714	0.242495	0.557536	0.500761
1	0.261567	0.75254	0.740354	0.644853	0.0326897	0.0823189	0.182719	0.291838	0.22227	0.300285	0	0.20716	0.239112	0.0798434	0.264957	0.741158	0.957281	0	0.658729	0.915672	0.0042624	0.297493	0.434823	0.297415	0.382133	0.900048	0.756242	0.881852	0.271751	0.0150521	0.03125	0.0274745	0.0183679	0.923662	0.385397	0.160011	0	0.466362	0.0916484	0	0.316342	0	0.217143	0.0998935	0.0523015	0.492235	0.0514165	0.113222	0.0650563
1	0.267889	0.225429	0.427277	0.612003	0.114768	0.261445	0.0369455	1	0.484015	0.587192	0.841982	0.0649194	0.356047	0.830207	0.22861	0.594002	0.5922	0.568423	0.557747	0.523599	0.776757	0.205949	0.649145	0.133266	0.254636	0.548961	0.921896	0.0785674	0.127495	0.0566203	0.547106	0.571006	0.365097	0.311549	0.278014	0.0873232	0.697835	0.434193	0.138341	0.445491	0.121983	0.504583	0.62032	0.00198248	0.166729	0.619585	0.00378436	0.843028	0
1	0.600073	0.119175	0.450556	0.351533	0.177712	0.290389	0.0722846	0.340164	0.406533	0.219591	0.373537	0.308516	0.50486	0.246635	0.49705	0.503822	0.272486	0.0964793	0.397281	0.228159	0.314552	0.175795	0.342864	0.572837	0.435011	0.475882	0.479331	0.043482	0.225801	0.914063	0.419218	0.191184	0.133685	0.119531	0.184094	0.0495144	0.155535	0.454931	0.170322	0.209165	0.0879593	0.503252	0.260212	0.312404	0.324031	0.207455	0.207759	0.44797	0.190602
1	0.775464	0.552707	1	0.602693	0.0991994	0.300551	0.0662923	0.462408	0.232491	0.32195	0.220945	0.619498	0.551415	0.838226	0.354286	0.355743	0.56605	0.0247683	0.398227	1	0.175092	0.279087	0.405544	0	0.315399	0.215853	0.656537	0.870557	0	0.0736851	0.437384	0.437455	0.0418747	0.482254	0.566672	0.299712	0.167204	0.142554	0.105217	0.103197	0.342955	0.193062	0.358169	0.331903	0.03654	0.23263	0.194609	0.328951	1
1	0.901761	0.433137	0.486324	0.304125	0.0901591	0.168838	0.0127	0.463364	0.273192	0.21247	0.45689	0.277482	0.575955	0.615579	0.710949	0.486622	0.590059	0.452991	0.989319	0.209887	0.427306	0.0893496	0.434074	0.647087	0.547265	0.532141	0.512703	0.141518	0.0513799	0.681456	0.186807	0.403976	0.39687	0.0953052	0.185116	0.136191	0.191463	0.328054	0.30286	0.103289	0.279565	0.607519	0.121549	0.239437	0.172436	0.25519	0.156469	0.211692	0.325586
1	0.339912	0.202163	0.243691	0.598375	0.109611	0.258171	0.0423731	0.291838	0.341273	0.910922	0.335363	0.289917	0.378467	0.587066	0.0938371	0.355743	0.463435	0.0313579	0.597966	0.973951	0.290966	0.127338	0.741853	0.169462	0.614419	0.269599	0.787752	0.120377	0.0729341	0.782708	1	0.226119	0.0836319	0.418967	0.809094	0.0934201	0.148319	0.011757	0.176764	0.0534922	0.0937771	0.249286	0.259077	0.0902178	0.269932	0.443518	0.217886	0.129739	0.542373
1	1	0.467014	0.236701	0.256988	0.259675	0.395971	0.0171174	0.30754	0.273725	0.190055	0.053872	0.627234	0.78986	0.0275055	0.7089	0.725796	0.438853	0.046071	0.871627	0.184637	0.0682651	0.179269	0.434948	0.297415	0.27426	0.318318	0.608547	0.114148	0.213314	0.301391	0.367664	0.100209	0.130587	0	0.0946015	0.129672	0.288039	0.502613	0.606908	0.345806	0.382744	1	0.483689	0.540981	0.493645	0.154651	0.112283	0.60364	0.290165
1	0.151933	0.681192	0.0863286	0.124807	0.117179	0.654163	0.0358756	0.0765838	0.42057	0.0538496	0.195396	0.0235709	0.158915	0.128992	0.323799	0.359627	0.187838	0.249099	0.407553	0.255274	0.322478	0.42132	0.139468	0.292692	0.242904	0.369261	0.0785699	0.653692	0.51889	0.269625	0.329887	0.342249	0.0697862	0.0647887	0.028951	0.270834	0.468294	0.622469	0.0671601	0.640983	0.44577	0.606485	0.283377	0.155995	0.533509	0	0.0532347	0.383374	0.305491
1	0.192041	0.501583	0.0837337	0.277705	0.102218	0.269201	0.0350442	0.0966331	0.159426	0.183332	0.0456402	0.130581	0.330053	0.171857	0.122726	0.226457	0.429666	0.0958099	0.214943	0.51156	0.0155844	0.422618	0.111	0.220003	0.184475	0.215273	0.529347	0.537649	0.267398	0.0735101	0.239631	0.18377	0.0629588	0.513333	0.334128	0.315812	0.400891	0.441052	0.0688505	0.19503	0.256138	0.166355	0.301957	0.441827	0.15588	0.272192	0.494884	0.664243	0.318888
1	0.0783141	0.599124	0.0521619	0.0924266	0.0296166	0.228353	0.0187802	0.10935	0.334012	0.110088	0.500732	0.0540818	0.278829	0.606856	0	0.0815377	0.503663	0.0790188	0.365341	0.0705838	0.294905	0.44601	0.127731	0.0717602	0.122577	0.255292	0.309489	0.820065	0.441343	0.0753479	0.273134	0.38105	0.0144917	0.481315	0.350562	1	0.990941	0.545395	0.014163	0.234017	1	0.26466	0.246691	0.42434	0.206363	0.132418	0.349175	0.135412	0.525627
1	0.280515	0.39623	0.0790406	0.0576713	0.0114034	0.374076	0.0956077	0.0976072	0.409088	0.208465	0.155091	0.0452394	0.31683	0.222905	0.234961	0.485845	0.796776	0.219345	0.614166	0.135787	0.0946387	0.764113	0.567611	0.778673	0.220912	0.581634	0.867827	0.353714	0.598902	0.290102	0.332544	0.361445	0.0091766	0.187512	0.462108	0.544777	0.378934	0.803396	0.0497533	0.7233	0.409807	0.767074	0.345925	0.0350041	0.292362	0.190453	0.00213531	0.343154	0.551101
1	0.67806	0.192145	0.432613	0.605985	0.0429668	0.155522	0.0799366	0.550592	0.37758	0.584827	0.349817	0.886892	0.956614	0.247245	0.060318	0.302587	0.663323	0.217141	0.329288	0.460793	0.203397	0.122491	0.420777	0.275957	0.247908	0.232576	0.491678	0.070183	0.15064	0.578367	0.151687	0.077056	0.117607	0.582347	0.414169	0.0643871	0.34316	0	0.352522	0.0862897	0.0848253	0.513502	0.461611	0.51512	0.175718	0.398398	0.174482	0.208078	0.123922
1	0.159234	0.166182	0.0129923	0.162091	0.0624089	0.229394	0.165715	0.155824	0.0801526	0.259668	0.335427	0.0687639	0.212546	0.230221	0.0720374	0.244771	0.224245	0.184563	0.311401	0.18192	0.245288	0.591371	0.414409	0.0755142	0.00716959	1	0.51503	0.374087	0.0967947	0.228319	0.153737	0.294942	0.0513449	0.243005	1	0.415303	0.351604	0.592913	0.0635508	0.219512	0.46002	0.205085	0.349234	0.140727	0.0666207	0.248651	0.44389	0.152181	0.332314
1	0.600584	0.295302	0.606808	0.318677	0.117616	0.237495	0.0633777	0.380741	0.282708	0.312112	0.161372	1	0.595826	0.133049	0.448287	0.45869	0.287252	0.0733775	0.295738	0.209035	0.145455	0.170836	0.279998	0.470768	0.387894	0.20464	0.633158	0.130087	0.224608	0.190514	0.577547	0.118495	0.111661	0.221127	0.330126	0.13173	0.290342	0.188276	0.300256	0.26007	0.202064	0.315758	0.562736	0.714463	0.179523	0.224783	0.730127	0.761116	0.163909
1	0.238877	0.752631	0.147357	0.357838	0.0535476	0.457738	0.159779	0.175944	0.290837	0.240836	0.00384146	0.158593	0.314448	0.0618346	0.197181	0.496125	0.332281	0.068852	0.318811	0.347539	0.103896	0.590092	0.172618	0.485211	0.342837	0.359594	0.512046	0.471404	0.44182	0.197777	0.290694	0.0439865	0.0228314	0.172113	0.167405	0.660711	0.585137	0.594056	0.194673	0.81578	0.636354	0.386912	0.232886	0.73556	0.28214	0.0411967	0.30537	0.496554	0.332314
1	0.201872	0.33182	0.0887833	0	0.121823	0.494092	0.036249	0.285099	0.478823	0.147893	0.359787	0.0330231	0.257052	0.580219	0.428577	0.367177	0.537139	0.445551	0.563062	0.0175794	0.425108	0.416436	0.441753	0.220477	0.233211	0.393717	0.17759	0.458004	0.16774	0.175112	0.217884	0.380504	0.0906355	0.124413	0.583787	0.929661	0.415747	0.39631	0.09608	0.479398	0.52689	0.45915	0.117105	0.112972	0.168088	0.160046	0.216575	0.198117	0.41835
1	0.168616	0.350889	0.120612	0.192939	0.0274707	0.488464	0	0.687147	0.208718	1	0.828933	0.0383789	0.37911	0.912676	0.0933044	0.683951	0.565149	0.119818	0.355938	0.143352	0.358442	0.429743	0.110126	0.356094	0.276229	0.179894	0.196644	0.294863	0.27917	0.25509	0.241451	0.360808	0	0.122817	0.233481	0.283296	0.366651	0.0888308	0.0771199	0.342018	0.358867	0.394156	0	0.279885	0.124232	0.0833742	0.10389	0.149029	0.35715
1	0.206706	0.114054	0.00209232	0.186319	0.0203974	0.280394	0.119903	0.132569	0.0879343	0.177008	0.20003	0.057807	0.245473	0.385828	0.70849	0.127741	0.449504	0.34191	0.472889	0.23828	0.166101	0.524994	0.271694	0.315077	0.179934	0.196907	0.593599	0.129951	0.122326	0.169161	0.290723	0.219296	0.0415223	0.413239	0.421322	0.153518	0.389836	0.562214	0.00941155	0.293976	0.178914	0.374396	0.238134	0.131169	0.183285	0.411476	0.0759831	0.133815	0.493454
1	0.267333	0.345343	0.0462064	0.349451	0	0.28595	0.480793	0.576185	0.155056	0.453306	0.0384756	0.0461939	0.148194	0.155513	0.119202	0.377289	0.355613	0.0626809	0.278158	0.22166	0.014985	0.494803	0.136846	0.414795	0.298347	0.307782	0.464164	0.543494	0.230653	0.234707	0.219357	0.131141	0.0153139	0.460845	0.598944	0.327412	0.44557	0.520901	0.0435855	0.251386	0.307546	0.343648	0.136536	0.0692094	0.0457795	0.126206	0.150909	0.0906111	0.555871
1	0.144174	0.768766	0	0.0583824	0.00862795	0.366947	0.0593462	0.0990595	0.251836	0.192491	0.69439	0.0965108	0.163156	0.299747	0.00967055	0.0744393	0	0.12251	0	0.0764436	0.826041	0.310109	0.0596829	0.104044	0	0.038956	0.480672	0.555024	0.315676	0.109128	0.260831	1	0.108739	0.203192	0.50017	0.796057	1	0.436709	0.0846126	0.330285	0.293064	0.176013	0.391831	0.0859273	0.0650947	0.125388	0.0917759	0.177356	0.430021
1	0.486034	0.937443	0.0921731	0.197961	0.0447246	0.224059	0.0978164	0.387099	0.248136	0.612911	0.390732	0.307747	0.378562	0.734254	0.245902	0.379578	0.269161	0.104603	0.316052	0.362774	0.345654	0.22244	0.00874017	0.137257	0.0741979	0.260319	0.420691	0.818691	0.104748	0.245296	0.211299	0.27412	0.0842485	0.216338	0.408208	0.624182	0.687394	0.285598	0.114355	0.316888	0.771704	0.174485	0.211989	0.29536	0.0455287	0.484224	0.821268	0.266706	0.311174
1	0.137844	0.123746	0.0212797	0.100124	0.116896	0.348838	0.186588	0.163547	0.262994	0.1916	0.432256	0.0480366	0.124988	0.903485	0.335519	0.0561786	0.59654	0.39842	0.339636	0.138824	0.414252	0.769996	0.396866	0.0021536	0.110782	0.380087	0.81187	0.19871	0.487473	0.218605	0.165463	0.27412	0.0863188	0.0938967	0.608907	0.223079	0.797175	0.883573	0.0860289	0.515706	0.5432	0.394057	0.330323	0.0725826	0.40842	0.199771	0.0786258	0.232285	0.220643
1	0.597534	0.373026	0.182499	0.502753	0.218323	0.123222	0.0895275	0.118701	0.193837	0.482983	0.717835	0.740276	0.387371	0.304976	0.0809294	0.502562	0.489067	0.140361	0.857982	0.55359	0.564369	0.116627	0.89337	0.0945014	0.276902	0.0804253	0.881899	0.0893914	0.0817625	0.0430559	0.456013	0.389056	0.223292	0.869953	0.930943	0.0799594	0.36788	0.261104	0.305693	0.135625	0.119559	0.435153	0.512197	0.132235	0.0713241	1	0.435518	0.304825	0.088298
1	0.792548	0.562193	0.311902	0.545	0.112194	0.138875	0.142916	0.175608	0.262785	0.362706	0.439878	0.8252	0.583389	0.176875	0.523398	0.391497	0.491152	0.068587	0.426743	0.573567	0.288112	0.147107	0.463042	0.455061	0.314957	0.423586	0.661903	0.138137	0.0992603	0.304104	0.270506	0.129822	0.129221	0.768263	0.509452	0.118863	0.443114	0.258981	0.374086	0.106061	0.147314	0.22243	0.400482	0.534501	0.0986036	0.401504	0.0837421	0.309364	0.265198
1	0.696257	0.454759	0.507919	0.407936	0.206118	0.179408	0.0184225	0.448416	0.221275	0.331905	0.255305	0.790096	0.492543	0.319655	0.429233	0.385721	0.904249	0.0437699	0.550107	0.623109	0.177822	0.12378	0.326133	0.430877	0.452483	0.636926	0.537396	0.20214	0.0631512	0.452962	0.286969	0.086563	0.0939537	0.274554	0.541894	0.133631	0.260402	0.660679	0.414748	0.159183	0.247533	0.291416	0.331174	0.671914	0.153309	0.608959	0.518584	0.561864	0.330965
1	0.564474	0.0877837	0.0878716	0.309434	0.129065	0	0.0871663	0.141372	0.26615	0.780807	0.515	0.408812	0.831721	0.208906	0.237584	0.192425	0.718778	0.0565027	0.369455	0.839016	0.297236	0.118243	0.716069	0.51795	0.189668	0	0.600307	0.0191217	0.244094	0.866982	0.385917	0.189729	0.117475	1	0.385397	0.0094753	0.134961	0.0507838	0.189236	0.113359	0.035253	0.0914556	0.336564	0.045242	0	0.544548	0.38167	0.359586	0.0570385
1	0.0614207	0.306234	0.293988	0.21598	0.0520493	0.659468	0.00919872	0.405342	0.615656	0	0.844299	0.014185	0.302821	0.749449	0.374857	0.219454	0.647543	0.286363	0.42176	0.0304709	0.267532	0.731942	0.382195	0.326892	0.483369	0.81943	0.336098	0.186449	1	0.433272	0.148423	0.117313	0.10752	0.392394	0.429411	0.195418	0.190542	1	0.217151	0.186992	0.308412	0.821277	0.0426437	0.856521	0.186513	0.233448	0.0595772	0.442086	0.450218
1	0.355033	0.388101	0.216876	0.290182	0.087082	0.312804	0.0198124	0.270488	0.284223	0.287026	0.125732	0.220762	0.566997	0.126765	0.22316	0.228474	0.732248	0.0659373	0.388926	0.549595	0.022311	0.508559	0.19578	0.778219	0.243997	0.4203	0.761142	0.463193	0.289191	0.322569	0.23374	0.105395	0.0297909	0.330516	0.422428	0.242425	0.504222	0.506205	0.121528	0.209812	0.551823	0.309106	0.262387	0.404131	0.245203	0.212686	0.198499	0.734597	0.698264
1	0.0796513	0.274033	0.0372117	0.122725	0.0758918	0.228643	0.122021	0.0796479	0.187639	0.179748	0.631555	0.0783288	0.189102	0.215847	0.114407	0.0307775	0.578674	0.224038	0.250843	0.176007	0.549717	0.53239	0.275627	0.0831012	0.080169	0.535621	0.676029	0.203502	0.493518	0.149033	0.21566	0.28407	0.0279556	0.282066	0.722156	0.315285	0.945647	0.520901	0.0851151	0.315133	0.616563	0.188775	0.313115	0.550361	0.268218	0.196829	0.238351	0.184122	0.256369
1	0.0681953	0.692276	0.0812556	0.10865	0.0805175	0.376976	0.0792527	0.0532049	0.318633	0.0681845	0.314512	0.0401686	0.031521	0.245838	0.0625717	0.204238	0.00507214	0.196898	0.146847	0.15619	0.288178	0.517262	0.0565614	0.0820343	0.15977	0.183567	0.375903	0.678585	0.738328	0.0567953	0.166128	0.496316	0.122453	0.136056	0.0762943	0.77122	0.585905	0.806009	9.14e-05	0.437639	0.651314	0.355721	0.461989	0.0532607	0.325327	0.100213	0.176004	0.19568	0.27758
1	0.13933	0.108664	0.0568374	0.182625	0.0905312	0.348681	0.121136	0.146508	0.194392	0.181482	0.429207	0.0433702	0.086796	0.284528	0.12584	0.157531	0.357867	0.18305	0.45554	0.19023	0.342125	0.422281	0.101573	0.135815	0.242988	0.311551	0.313568	0.120142	0.265012	0.233482	0.161247	0.243359	0.0844981	0.06723	0.153525	0.147791	0.423768	0.298171	0.0971308	0.347469	0.158967	0.443924	0.285599	0.0909279	0.479284	0.0861533	0.330677	0.185551	0.477926
1	0.102017	0.416463	0.0361656	0.147356	0.0231728	0.337611	0.0238219	0.243301	0.103035	0.307638	0.281311	0.0459553	0.220004	0.391643	0.206319	0.105742	0.50355	0.312595	0.673957	0.0937034	0.229304	0.380408	0.153827	0.174323	0.111959	0.340164	0.530059	0.350321	0.291895	0.123479	0.191832	0.361581	0.0529453	0.379906	0.574591	0.466005	0.434516	0.568746	0.0693074	0.355322	0.333276	0.359432	0.124149	0.205527	0.161775	0.323688	0.0142706	0.0973355	0.192936
1	0.147564	0.125719	0.057381	0.221426	0.202576	0.256346	0.443816	0.146189	0.238226	0.14787	0.00603658	0.0369008	0.0961832	0	0.295771	0	0.413661	0.242718	0.409929	0.107341	0.0130536	0.521595	0.217318	0.285065	0.17453	0.40464	0.615665	0.176256	0.362443	0.357574	0.201768	0.0236991	0.0933664	0.420939	0.483822	0.157385	0.318747	0.681417	0.0748812	0.260809	0.24168	0.24559	0.340015	0.278702	0.322024	0.276443	0.107421	0.168278	0.495687
1	0.394503	0.104339	0.173546	0.360147	0.155894	0.657029	0.0803947	0.28788	0.186356	0.331085	0.140854	0.150036	0.527018	0.701004	0.674193	0.4589	0.612714	0.171496	0.596561	0.493181	0.0900433	0.365672	0.109564	0.423429	0.144716	0.661092	0.439088	0.107931	0.198043	0.331408	0.28099	0.672626	0.0883597	0.0661033	0.223433	0.124169	0.764471	0.826911	0.126188	0.753141	0.204003	0.585345	0.143816	0.382442	0.152682	0.0338401	0.226195	0.425611	0.682635
1	0.211932	0.344239	0.020029	0.160991	0.0669722	0.43343	0.0508722	0.0255575	0.105776	0.139367	0.130732	0.104644	0.248856	0.232073	0.206442	0.434371	0.352852	0.164634	0.256516	0.19316	0.0973027	0.554531	0.212448	0.435916	0.195408	0.17999	0.737188	0.332933	0.284419	0.144395	0.320905	0.272926	0.036354	0.151549	0.282783	0.482171	0.414556	0.507511	0.0836531	0.524945	0.443865	0.34084	0.686271	0.339123	0.113424	0.136832	0.052537	0.276961	0.475084
1	0.174319	0.357604	0.0973747	0.373408	0.0797734	0.383781	0.100298	0.172491	0.0673412	0.356991	0.0553659	0.25802	0.510793	0.164916	0.215948	0.313036	0.328956	0.144977	0.130468	0.389303	0.0278388	0.416081	0.0839056	0.253927	0.11219	0.257419	0.900268	0.400292	0.26024	0.108077	0.503061	0.120406	0.0428584	0.326854	0.364271	0.371991	0.624597	0.324788	0.110334	0.573633	0.399955	0.21839	0.428423	0.92005	0.183076	0.167075	0.258436	0.311171	0.447478
1	0.044366	0.17808	0.0736228	0.371605	0.15081	0.518721	0.0426837	0.301358	0.455547	0.152835	0.366707	0	0.0612551	0.371697	0.346296	0.312983	0.796269	0.182229	0.492053	0.224537	0.106027	0.989177	0.537583	0.101911	0.241285	0.742291	0.64211	0.19549	0.492404	0.47624	0	0.34425	0.157338	0.204131	0.385814	0.231168	0.318594	0.939909	0.076663	0.562823	0.285123	0.534394	0.140034	0.348562	0.331515	0.137813	0.0745666	1	0.58165
1	0.122941	0.130894	0.0427757	0.148654	0.0736272	0.221936	0.105697	0.173589	0.0772273	0.146745	0.269482	0.0225501	0.0723816	0.726915	0.324168	0.119676	0.612263	0.472948	0.321545	0.145589	0.178954	0.501013	0.155513	0.0946002	0.0563475	0.246303	0.41976	0.188455	0.220711	0.178174	0.237003	0.634279	0.0888736	0.326103	0.411018	0.178817	0.422847	0.730242	0	0.312731	0.206929	0.390165	0.262339	0.0836194	0.299636	0.302926	0.061797	0.573212	0.184715
1	0.140676	0.496873	0.0414139	0.109441	0.0160492	0.32838	0.00360796	0.142435	0	0.129389	0.129055	0.0124218	0.189984	0.436923	0.271431	0.154223	0.463435	0.58216	0.408959	0.0695184	0.131402	0.294009	0.107067	0.209116	0.147597	0.444853	0.386553	1	0.424958	0.430559	0.70454	0.161754	0.0905474	0.239718	0.26439	0.689783	0.282051	0.722404	0.0185033	0.191796	0.62058	0.289741	0.229435	0.0810155	0.172666	0.392349	0	0.0504329	0.391454
1	0.413714	0.310078	0.252709	0.134608	0.0958608	0.33073	0.0156523	0.393192	0.183454	0.608765	0.565854	0.158063	0.383851	0.588566	0.288559	0.18834	0.502198	0.192798	0.608442	0.354411	0.433899	0.35271	0	0.578132	0.282663	0.652489	0.288163	0.314307	0.0853416	0.182638	0.596696	0.372908	0.0539437	0.251362	0.489697	0.25128	0.551512	0.854017	0.131351	0.392923	0.237854	0.294718	0.25955	0.207243	0.0444835	0.552068	0.234947	0.527402	0.219223
1	0.458957	0.60074	0.0972636	0.225598	0.0956536	0.387444	0.0230407	0.177237	0.133896	0.332514	0.166951	0.117961	0.16461	0.375557	0.393214	0.457157	0.434006	0.171335	0.372113	0.356435	0.122078	0.379773	0.106443	0.300417	0.221101	0.265732	0.400104	0.458599	0.188181	0.10764	0.063973	0.34193	0.100047	0.141784	0.178389	0.486552	0.427146	0.572828	0.12966	0.352458	0.380095	0.419188	0.137292	0.341668	0.188867	0.0822299	0.0572304	0.237791	0.456409
1	0.192144	0.1523	0.163616	0.281685	0.128305	0.275623	0.0597352	0.0640973	0.215297	0.209636	0.029939	0.337098	0.567759	0.00797261	0.0491313	0.278971	0.184739	0.108466	0.539427	0.409493	0.0975691	0.942046	0.641653	0.478336	0.102876	0.18318	0.52965	0.108439	0.488666	0.152708	0.585663	0.0933406	0.0918835	0.246761	0.739612	0.224596	0.814678	0.280372	0.160042	0.396803	0.26528	0.162363	0.96927	1	0.079372	0.141573	0.297611	0.676851	0.283264
1	0.17268	0.340222	0.141915	0.11936	0.0946078	0.350663	0.046323	0.0951985	0.237371	0.155061	0.20814	0.0978762	0.189674	0.158163	0.209064	0.228999	0.0406898	0.142069	0.0667672	0.134456	0.223243	0.281132	0.0897116	0.134965	0.115008	0.129435	0.528553	0.76654	0.281635	0	0.473833	0.263919	0.188348	0.413052	0.19014	0.746173	0.587287	0.944317	0.143366	0.209442	0.68745	0.213906	0.525908	0.149248	0.110373	0.237862	0.0745666	0.283349	0.146554
1	0.0767804	0.159294	0.0121506	0.10497	0.0474759	0.408247	0.0398852	0	0.299728	0.0137025	0.489421	0.0148014	0.22951	0.141772	0.37498	0.207745	0.57394	0.392277	0.2801	0.208768	0.716417	0.721165	0.339243	0.1126	0.0960641	0.123055	1	0.132155	0.531695	0.0798985	0.386437	0.288073	0.0962882	0.229671	0.412892	0.220532	0.415747	0.555519	0.154194	0.497044	0.438134	0.269489	0.337087	0	0.145157	0.354913	0.00315011	0.187064	0.395311
1	0.119367	0.226401	0.0842305	0.259466	0.176167	0.419862	0.130451	0.114646	0.262427	0.154826	0.25375	0.0361783	0.0742638	0.179735	0.193083	0.692414	0.185866	0.472028	0.292825	0.14202	0.321079	0.516291	0.134474	0.177978	0.294752	0.139681	0.249398	0.170745	0.415096	0.0588956	0.117173	0.303221	0.275357	0.129577	0.145777	0.259172	0.523875	0.513553	0.139026	0.592849	0.188437	0.419188	0.200123	0.16357	0.19819	0.0660454	0.25019	0.390771	0.273724
[truncated: 76 more columns]
