# Supplementary material for: Integrating microRNA expression, miRNA-mRNA regulation network and signal pathway: a novel strategy for lung cancer biomarker discovery
Source: PeerJ. 2021 Oct 25;9:e12369. doi: 10.7717/peerj.12369 (PMC8552790; doi:10.7717/peerj.12369)
Supplement: Supplemental Information 11 [file peerj-09-12369-s011.xlsx]

## Sheet: human_miRNA_mRNA
miRNA	mRNA
hsa-miR-126-3p	VIPR1
hsa-miR-126-3p	ADGRE5
hsa-miR-126-3p	ZNF653
hsa-miR-126-3p	PMM1
hsa-miR-126-3p	PIK3R2
hsa-miR-126-3p	GJC2
hsa-miR-126-3p	CRK
hsa-miR-141-3p	DLX5
hsa-miR-141-3p	ZEB2
hsa-miR-141-3p	NR0B2
hsa-miR-141-3p	TTR
hsa-miR-144-3p	ADAMTS1
hsa-miR-144-3p	BEST1
hsa-miR-145-5p	C11orf65
hsa-miR-145-5p	NOSTRIN
hsa-miR-145-5p	Alppl2
hsa-miR-145-5p	CRNDE
hsa-miR-145-5p	ALDH3A1
hsa-miR-145-5p	MMP12
hsa-miR-145-5p	RAB33A
hsa-miR-145-5p	AKR1B10
hsa-miR-145-5p	CEP19
hsa-miR-21-5p	LGALS14
hsa-miR-21-5p	TCF21
hsa-miR-21-5p	SOD3
hsa-miR-21-5p	TASL
hsa-miR-21-5p	Vector
hsa-miR-21-5p	SERPINB5
hsa-miR-21-5p	SMAD7
hsa-miR-21-5p	PDHA2
hsa-miR-21-5p	CASC2
hsa-miR-21-5p	PELI1
hsa-miR-21-5p	TGFB1
hsa-miR-21-5p	HNRNPK
hsa-miR-21-5p	ZGLP1
hsa-miR-21-5p	SPRY1
hsa-miR-21-5p	TAp63
hsa-miR-21-5p	DOCK2
hsa-miR-21-5p	RNF17
hsa-miR-21-5p	NTF3
hsa-miR-21-5p	MSLN
hsa-miR-218-5p	ASB2
hsa-miR-218-5p	AOPEP
hsa-miR-218-5p	RASA4
hsa-miR-218-5p	MAGED4B
hsa-miR-218-5p	ABHD11
hsa-miR-218-5p	FSHR
hsa-miR-218-5p	CRACR2B
hsa-miR-218-5p	CAPN5
hsa-miR-218-5p	CSDC2
hsa-miR-218-5p	SHISAL1
hsa-miR-218-5p	UBAP1L
hsa-miR-218-5p	RPL21
hsa-miR-218-5p	TBC1D3I
hsa-miR-218-5p	ZSCAN5A
hsa-miR-218-5p	PCDHB14
hsa-miR-218-5p	VOPP1
hsa-miR-218-5p	DGAT2
hsa-miR-218-5p	KIRREL3
hsa-miR-218-5p	FAM83E
hsa-miR-218-5p	ADAT3
hsa-miR-30a-5p	AK1
hsa-miR-30a-5p	BECN1
hsa-miR-30a-5p	HCC
hsa-miR-30a-5p	BECN2
hsa-miR-451a	PPP1R14A
hsa-miR-451a	ADAD1
hsa-miR-183-5p	AANAT
hsa-miR-183-5p	ACTR3C
hsa-miR-183-5p	BARHL2
hsa-miR-183-5p	EZR
hsa-miR-183-5p	KRTAP3-2
hsa-miR-183-5p	PCLAF
hsa-miR-183-5p	PTPA
hsa-miR-210-3p	EFNA3
hsa-miR-210-3p	FGFRL1
hsa-miR-210-3p	HOXA9
hsa-miR-210-3p	SORCS2
hsa-miR-210-3p	TMEM35A
hsa-miR-210-3p	ISCU1/2
hsa-miR-96-5p	ACTRT3
hsa-miR-96-5p	AQP5
hsa-miR-96-5p	TENT5B
hsa-miR-708-5p	GTF2F2
hsa-miR-708-5p	MAG
hsa-miR-708-5p	ZNF777
hsa-miR-708-5p	BIRC5
hsa-miR-1-3p	PXYLP1
hsa-miR-1-3p	ARIH2OS
hsa-miR-1-3p	CEBPA
hsa-miR-1-3p	CCSAP
hsa-miR-1-3p	GCFC2
hsa-miR-1-3p	CALM1
hsa-miR-1-3p	CDK9
hsa-miR-1-3p	MMP1
hsa-miR-1-3p	COX1
hsa-miR-1-3p	FABP3
hsa-miR-1-3p	FBLN2
hsa-miR-1-3p	FN1
hsa-miR-1-3p	FOXP1
hsa-miR-1-3p	GATA4
hsa-miR-1-3p	HAND2
hsa-miR-1-3p	HSPD1
hsa-miR-1-3p	HSPA4
hsa-miR-1-3p	IP6K2
hsa-miR-1-3p	IRX5
hsa-miR-1-3p	KCND2
hsa-miR-1-3p	KLHL42
hsa-miR-1-3p	KCNJ2
hsa-miR-1-3p	LRRC8A
hsa-miR-1-3p	MYEF2
hsa-miR-1-3p	MEF2A
hsa-miR-1-3p	MGC27345
hsa-miR-1-3p	CHRNA4
hsa-miR-1-3p	ND1
hsa-miR-1-3p	NEURL3
hsa-miR-1-3p	PNP
hsa-miR-1-3p	CDK14
hsa-miR-1-3p	PIM1
hsa-miR-1-3p	RABL2A
hsa-miR-1-3p	RABL2B
hsa-miR-1-3p	RASA1
hsa-miR-1-3p	RHEB
hsa-miR-1-3p	SRSF9
hsa-miR-1-3p	SRXN1
hsa-miR-1-3p	TH
hsa-miR-1-3p	NELFCD
hsa-miR-1-3p	TNS4
hsa-miR-1-3p	GJA1
hsa-miR-1-3p	XPO6
hsa-miR-1-3p	LOC51685
hsa-miR-1-3p	SLC16A9
hsa-let-7a-5p	ANAPC5
hsa-let-7a-5p	GOLT1B
hsa-let-7a-5p	KLF9
hsa-let-7a-5p	ATF4
hsa-let-7a-5p	CHRNB2
hsa-let-7a-5p	SMOX
hsa-let-7a-5p	ANAPC13
hsa-let-7a-5p	ZNF641
hsa-let-7a-5p	DTX4
hsa-let-7a-5p	MARCKS
hsa-let-7a-5p	PRLR
hsa-let-7a-5p	MMRN1
hsa-let-7a-5p	TMEM101
hsa-let-7a-5p	SPRYD3
hsa-let-7a-5p	SLC1A4
hsa-let-7a-5p	PALD1
hsa-let-7a-5p	HPS3
hsa-let-7a-5p	IDH1
hsa-let-7a-5p	KRAS
hsa-let-7a-5p	ZBTB34
hsa-let-7a-5p	SNX30
hsa-let-7a-5p	SLC41A3
hsa-let-7a-5p	ZNF10
hsa-let-7a-5p	TTLL4
hsa-let-7a-5p	ADRM1
hsa-let-7a-5p	BTBD7
hsa-let-7a-5p	PPP1R16B
hsa-let-7a-5p	SLC4A7
hsa-let-7a-5p	HMGA2
hsa-let-7a-5p	CERK
hsa-let-7a-5p	LBR
hsa-let-7a-5p	HRAS
hsa-let-7a-5p	SMCR8
hsa-let-7a-5p	NECAB3
hsa-let-7a-5p	ZNF17
hsa-let-7a-5p	NHLRC3
hsa-let-7a-5p	NME4
hsa-let-7a-5p	SIGMAR1
hsa-let-7a-5p	PBX3
hsa-let-7a-5p	PHC3
hsa-let-7a-5p	ACSL6
hsa-let-7a-5p	C19orf43
hsa-let-7a-5p	THOC5
hsa-let-7a-5p	TEK
hsa-let-7a-5p	BRWD1
hsa-let-7a-5p	FNIP1
hsa-let-7a-5p	GINS4
hsa-let-7a-5p	GTF2B
hsa-let-7a-5p	TRIM71
hsa-let-7a-5p	SNX24
hsa-let-7a-5p	HAND1
hsa-let-7a-5p	IKZF2
hsa-let-7a-5p	ESRP1
hsa-let-7a-5p	NRAS
hsa-let-7a-5p	ADAM9
hsa-let-7a-5p	CLDND1
hsa-let-7a-5p	DGCR2
hsa-let-7a-5p	RBM19
hsa-let-7a-5p	UNG
hsa-let-7a-5p	SMG8
hsa-let-7a-5p	NAPB
hsa-let-7a-5p	CENPQ
hsa-let-7a-5p	FBXL6
hsa-let-7a-5p	SLMAP
hsa-let-7a-5p	ZNF543
hsa-let-7a-5p	DIS3L
hsa-let-7a-5p	MAPRE1
hsa-let-7a-5p	PARP8
hsa-let-7a-5p	MDM4
hsa-let-7a-5p	YOD1
hsa-let-7a-5p	MEF2C
hsa-let-7a-5p	SRRM2
hsa-let-7a-5p	RUFY3
hsa-let-7a-5p	MAP3K7
hsa-let-7a-5p	MLEC
hsa-let-7a-5p	FKBP9
hsa-let-7a-5p	CABIN1
hsa-let-7a-5p	CLN8
hsa-let-7a-5p	ASB6
hsa-let-7a-5p	FOXN2
hsa-let-7a-5p	TMEM167A
hsa-let-7a-5p	EIF2C4
hsa-let-7a-5p	CTPS1
hsa-let-7a-5p	DAD1
hsa-let-7a-5p	TMEM201
hsa-let-7a-5p	CHD5
hsa-let-7a-5p	E2F2
hsa-let-7a-5p	C14orf28
hsa-let-7a-5p	CASP8AP2
hsa-let-7a-5p	FOXC1
hsa-let-7a-5p	PLEKHA8
hsa-let-7a-5p	MFSD11
hsa-let-7a-5p	C9orf64
hsa-let-7a-5p	FNBP4
hsa-let-7a-5p	ADPGK
hsa-let-7a-5p	PTP4A1
hsa-let-7a-5p	PRRC2B
hsa-let-7a-5p	EXO1
hsa-let-7a-5p	ZEB1
hsa-let-7a-5p	NEGR1
hsa-let-7a-5p	IPO4
hsa-let-7a-5p	MON1B
hsa-let-7a-5p	JAM3
hsa-let-7a-5p	TPP2
hsa-let-7a-5p	ITPR2
hsa-let-7a-5p	LRRC42
hsa-let-7a-5p	ARID3B
hsa-let-7a-5p	PLAGL2
hsa-let-7a-5p	ARG2
hsa-let-7a-5p	CHKA
hsa-let-7a-5p	GSN
hsa-let-7a-5p	G3BP1
hsa-let-7a-5p	FBXL5
hsa-let-7a-5p	STARD4
hsa-let-7a-5p	C9orf172
hsa-let-7a-5p	CHRM1
hsa-let-7a-5p	COA7
hsa-let-7a-5p	TIAM2
hsa-let-7a-5p	ADRB3
hsa-let-7a-5p	TAPBP
hsa-let-7a-5p	RSPRY1
hsa-let-7a-5p	BAHD1
hsa-let-7a-5p	IMPG2
hsa-let-7a-5p	CDK13
hsa-let-7a-5p	C19orf47
hsa-let-7a-5p	DVL3
hsa-let-7a-5p	GLI2
hsa-let-7a-5p	INPP5F
hsa-let-7a-5p	ZNF281
hsa-let-7a-5p	TNFSF9
hsa-let-7a-5p	PREB
hsa-let-7a-5p	HDAC2
hsa-let-7a-5p	HSPH1
hsa-let-7a-5p	NLGN2
hsa-let-7a-5p	ATG9A
hsa-let-7a-5p	LRRC58
hsa-let-7a-5p	ZCCHC14
hsa-let-7a-5p	CHD9
hsa-let-7a-5p	ALG8
hsa-let-7a-5p	CDKN1A
hsa-let-7a-5p	PAK7
hsa-let-7a-5p	DCP2
hsa-let-7a-5p	RSAD1
hsa-let-7a-5p	RNF165
hsa-let-7a-5p	RTTN
hsa-let-7a-5p	SON
hsa-let-7a-5p	LMBR1L
hsa-let-7a-5p	KLHDC8B
hsa-let-7a-5p	LDLR
hsa-let-7a-5p	EHD1
hsa-let-7a-5p	DONSON
hsa-let-7a-5p	TMOD2
hsa-let-7a-5p	C6orf120
hsa-let-7a-5p	EIF4G2
hsa-let-7a-5p	BCL2
hsa-let-7a-5p	ELF4
hsa-let-7a-5p	MRS2
hsa-let-7a-5p	NELFCD
hsa-let-7a-5p	TSPAN3
hsa-let-7a-5p	TSEN34
hsa-let-7a-5p	CTSZ
hsa-let-7a-5p	RHNO1
hsa-let-7a-5p	PRKCSH
hsa-let-7a-5p	SHISA5
hsa-let-7a-5p	FASLG
hsa-let-7a-5p	NAV1
hsa-let-7a-5p	SBNO1
hsa-let-7a-5p	NTPCR
hsa-let-7a-5p	ARHGEF7
hsa-let-7a-5p	KMT2A
hsa-let-7a-5p	GPATCH8
hsa-let-7a-5p	PTTG1IP
hsa-let-7a-5p	DNAJA3
hsa-let-7a-5p	PIEZO2
hsa-let-7a-5p	ACVR2A
hsa-let-7a-5p	BCL2L13
hsa-let-7a-5p	ANPEP
hsa-let-7a-5p	NUP214
hsa-let-7a-5p	RDX
hsa-let-7a-5p	KIF5C
hsa-let-7a-5p	NUFIP2
hsa-let-7a-5p	RORA
hsa-let-7a-5p	C3orf58
hsa-let-7a-5p	SZRD1
hsa-let-7a-5p	SSRP1
hsa-let-7a-5p	MRI1
hsa-let-7a-5p	NDUFA3
hsa-let-7a-5p	IARS
hsa-let-7a-5p	STARD7
hsa-let-7a-5p	UBR3
hsa-let-7a-5p	FNDC3B
hsa-let-7a-5p	CTNNA1
hsa-let-7a-5p	TMEM167B
hsa-let-7a-5p	EPN2
hsa-let-7a-5p	BAZ2A
hsa-let-7a-5p	SKP2
hsa-let-7a-5p	KMT2B
hsa-let-7a-5p	PRKD2
hsa-let-7a-5p	BZW2
hsa-let-7a-5p	TSN
hsa-let-7a-5p	SUB1
hsa-let-7a-5p	EIF3K
hsa-let-7a-5p	TSPYL4
hsa-let-7a-5p	TBRG1
hsa-let-7a-5p	SLC37A4
hsa-let-7a-5p	GREB1L
hsa-let-7a-5p	ZNF473
hsa-let-7a-5p	MAX
hsa-let-7a-5p	LLGL1
hsa-let-7a-5p	TTI1
hsa-let-7a-5p	ATXN2L
hsa-let-7a-5p	TFRC
hsa-let-7a-5p	COL1A1
hsa-let-7a-5p	MAML3
hsa-let-7a-5p	DDX26B
hsa-let-7a-5p	C16orf70
hsa-let-7a-5p	CLCF1
hsa-let-7a-5p	SSFA2
hsa-let-7a-5p	PCYOX1L
hsa-let-7a-5p	BCL9
hsa-let-7a-5p	HSDL1
hsa-let-7a-5p	RIC1
hsa-let-7a-5p	POM121
hsa-let-7a-5p	MFSD12
hsa-let-7a-5p	TTC22
hsa-let-7a-5p	HOXA3
hsa-let-7a-5p	FUT11
hsa-let-7a-5p	PIK3C2B
hsa-let-7a-5p	HTT
hsa-let-7a-5p	CTDSPL
hsa-let-7a-5p	MICAL2
hsa-let-7a-5p	C5orf30
hsa-let-7a-5p	RFX3
hsa-let-7a-5p	TFPI
hsa-let-7a-5p	CNNM3
hsa-let-7a-5p	COL4A2
hsa-let-7a-5p	MSMO1
hsa-let-7a-5p	SPECC1
hsa-let-7a-5p	IGSF3
hsa-let-7a-5p	EXOSC10
hsa-let-7a-5p	ARF6
hsa-let-7a-5p	SCN8A
hsa-let-7a-5p	PLEKHM2
hsa-let-7a-5p	MAPK1
hsa-let-7a-5p	ZNF623
hsa-let-7a-5p	EPM2AIP1
hsa-let-7a-5p	RALY
hsa-let-7a-5p	LMBRD2
hsa-let-7a-5p	SLC11A2
hsa-let-7a-5p	SLC4A5
hsa-let-7a-5p	GOT1
hsa-let-7a-5p	PRDX6
hsa-let-7a-5p	WNT9A
hsa-let-7a-5p	SMARCD1
hsa-let-7a-5p	UBQLN1
hsa-let-7a-5p	PTPN6
hsa-let-7a-5p	FAM104A
hsa-let-7a-5p	LARP1
hsa-let-7a-5p	ADCY9
hsa-let-7a-5p	PROSER3
hsa-let-7a-5p	PSMA4
hsa-let-7a-5p	CSNK2A1
hsa-let-7a-5p	CKAP2L
hsa-let-7a-5p	COPG1
hsa-let-7a-5p	ERRFI1
hsa-let-7a-5p	ULK3
hsa-let-7a-5p	COL15A1
hsa-let-7a-5p	TICRR
hsa-let-7a-5p	SCRN1
hsa-let-7a-5p	BAZ2B
hsa-let-7a-5p	RRM2
hsa-let-7a-5p	RANBP3L
hsa-let-7a-5p	PTP4A2
hsa-let-7a-5p	ATP2C1
hsa-let-7a-5p	SMIM15
hsa-let-7a-5p	WAC
hsa-let-7a-5p	POM121C
hsa-let-7a-5p	PNPLA8
hsa-let-7a-5p	ARL8B
hsa-let-7a-5p	RBM12B
hsa-let-7a-5p	VPS33A
hsa-let-7a-5p	CCNF
hsa-let-7a-5p	CHAC1
hsa-let-7a-5p	TMEM189-UBE2V1
hsa-let-7a-5p	ZNF414
hsa-let-7a-5p	CASP3
hsa-let-7a-5p	TMEM8A
hsa-let-7a-5p	ITGB3
hsa-let-7a-5p	LIN28
hsa-let-7a-5p	NF2
hsa-let-7a-5p	MED28
hsa-let-7a-5p	IRAK2
hsa-let-7a-5p	EIF3S1
hsa-let-7a-5p	RTCD1
hsa-let-7a-5p	MOR
hsa-let-7a-5p	RAVER2
hsa-let-7a-5p	PRDM1
hsa-let-7a-5p	DICER1
hsa-let-7a-5p	NIRF
hsa-let-7a-5p	ACP1
hsa-let-7a-5p	TEX2
hsa-let-7a-5p	PDE7A
hsa-let-7a-5p	LCLAT1
hsa-let-7a-5p	KARS
hsa-let-7a-5p	KCNC4
hsa-let-7a-5p	CD83
hsa-let-7a-5p	CCNJ
hsa-let-7a-5p	PKNOX2
hsa-let-7a-5p	MED11
hsa-let-7a-5p	SMIM13
hsa-let-7a-5p	ASXL2
hsa-let-7a-5p	RFC5
hsa-let-7a-5p	RNGTT
hsa-let-7a-5p	SLC25A25
hsa-let-7a-5p	HOXB7
hsa-let-7a-5p	FUT10
hsa-let-7a-5p	SYT16
hsa-let-7a-5p	CEP120
hsa-let-7a-5p	ZNF57
hsa-let-7a-5p	MBTPS1
hsa-let-7a-5p	JMJD1C
hsa-let-7a-5p	ARID2
hsa-let-7a-5p	SP1
hsa-let-7a-5p	TCF20
hsa-let-7a-5p	IGDCC4
hsa-let-7a-5p	EDEM3
hsa-let-7a-5p	C18orf32
hsa-let-7a-5p	RNF152
hsa-let-7a-5p	PTPRD
hsa-let-7a-5p	RPAP1
hsa-let-7a-5p	LONRF2
hsa-let-7a-5p	LPIN1
hsa-let-7a-5p	RCSD1
hsa-let-7a-5p	BTN2A1
hsa-let-7a-5p	ADAT1
hsa-let-7a-5p	TMEM132B
hsa-let-7a-5p	LHFP
hsa-let-7a-5p	PHF1
hsa-let-7a-5p	TUBB4A
hsa-let-7a-5p	BLVRB
hsa-let-7a-5p	LYPD3
hsa-let-7a-5p	CBX4
hsa-let-7a-5p	SARS2
hsa-let-7a-5p	SLC15A4
hsa-let-7a-5p	SLC9A1
hsa-let-7a-5p	GPSM2
hsa-let-7a-5p	PA2G4
hsa-let-7a-5p	CREB3L2
hsa-let-7a-5p	PROSER1
hsa-let-7a-5p	ARHGAP27
hsa-let-7a-5p	SPINT1
hsa-let-7a-5p	TMBIM1
hsa-let-7a-5p	FAM13A
hsa-let-7a-5p	VCL
hsa-let-7a-5p	EXOC4
hsa-let-7a-5p	BMP5
hsa-let-7a-5p	CAPRIN2
hsa-let-7a-5p	FBN1
hsa-let-7a-5p	XKR7
hsa-let-7a-5p	MT-ND3
hsa-let-7a-5p	FBXL14
hsa-let-7a-5p	PAPD4
hsa-let-7a-5p	KIFC2
hsa-let-7a-5p	PAPOLA
hsa-let-7a-5p	NPAT
hsa-let-7a-5p	TYK2
hsa-let-7a-5p	CLPTM1
hsa-let-7a-5p	AP1M1
hsa-let-7a-5p	CRTAP
hsa-let-7a-5p	PVR
hsa-let-7a-5p	CAP2
hsa-let-7a-5p	C5orf22
hsa-let-7a-5p	GRM5
hsa-let-7a-5p	WDR81
hsa-let-7a-5p	TXNDC11
hsa-let-7a-5p	EHD4
hsa-let-7a-5p	CAB39
hsa-let-7a-5p	IDE
hsa-let-7a-5p	PCDH7
hsa-let-7a-5p	CNTNAP2
hsa-let-7a-5p	SESTD1
hsa-let-7a-5p	ID1
hsa-let-7a-5p	WASF2
hsa-let-7a-5p	PTPRJ
hsa-let-7a-5p	RBM48
hsa-let-7a-5p	TSR1
hsa-let-7a-5p	RASSF4
hsa-let-7a-5p	BLOC1S1
hsa-let-7a-5p	RPS15A
hsa-let-7a-5p	IFIT3
hsa-let-7a-5p	TMEM151A
hsa-let-7a-5p	GDAP2
hsa-let-7a-5p	TET2
hsa-let-7a-5p	HDLBP
hsa-let-7a-5p	BMP4
hsa-let-7a-5p	TLDC1
hsa-let-7a-5p	ACVR1C
hsa-let-7a-5p	CDK4
hsa-let-7a-5p	TBKBP1
hsa-let-7a-5p	VTA1
hsa-let-7a-5p	TBC1D25
hsa-let-7a-5p	QSER1
hsa-let-7a-5p	RAB11FIP2
hsa-let-7a-5p	ZDHHC7
hsa-let-7a-5p	RBM28
hsa-let-7a-5p	ZNF585B
hsa-let-7a-5p	ANKRA2
hsa-let-7a-5p	WEE1
hsa-let-7a-5p	SCAF4
hsa-let-7a-5p	PRKAR2A
hsa-let-7a-5p	MIB1
hsa-let-7a-5p	STIM2
hsa-let-7a-5p	TNFRSF11A
hsa-let-7a-5p	SLC22A23
hsa-let-7a-5p	ZNF697
hsa-let-7a-5p	HN1
hsa-let-7a-5p	PGPEP1
hsa-let-7a-5p	TBC1D9
hsa-let-7a-5p	FXR2
hsa-let-7a-5p	PRKAA1
hsa-let-7a-5p	KDELR1
hsa-let-7a-5p	SCD
hsa-let-7a-5p	RFX7
hsa-let-7a-5p	TP53
hsa-let-7a-5p	DSCR3
hsa-let-7a-5p	UBE2B
hsa-let-7a-5p	USP42
hsa-let-7a-5p	RNF213
hsa-let-7a-5p	ECE2
hsa-let-7a-5p	QARS
hsa-let-7a-5p	MFI2
hsa-let-7a-5p	LIFR
hsa-let-7a-5p	RAPGEF2
hsa-let-7a-5p	SEC16A
hsa-let-7a-5p	DSG2
hsa-let-7a-5p	SIN3B
hsa-let-7a-5p	ZCCHC3
hsa-let-7a-5p	THBS2
hsa-let-7a-5p	UTP15
hsa-let-7a-5p	DMD
hsa-let-7a-5p	TP53INP2
hsa-let-7a-5p	RSBN1L
hsa-let-7a-5p	FAXC
hsa-let-7a-5p	ERCC6
hsa-let-7a-5p	REPS2
hsa-let-7a-5p	PNRC1
hsa-let-7a-5p	ZNF33A
hsa-let-7a-5p	PHLPP1
hsa-let-7a-5p	SLC43A3
hsa-let-7a-5p	UBE2T
hsa-let-7a-5p	GGA3
hsa-let-7a-5p	KIRREL
hsa-let-7a-5p	SMG9
hsa-let-7a-5p	ERLIN1
hsa-let-7a-5p	CLN6
hsa-let-7a-5p	SHMT2
hsa-let-7a-5p	KIFAP3
hsa-let-7a-5p	POU3F2
hsa-let-7a-5p	ARHGAP1
hsa-let-7a-5p	TALDO1
hsa-let-7a-5p	MAPKBP1
hsa-let-7a-5p	C19orf48
hsa-let-7a-5p	RIOK2
hsa-let-7a-5p	ZNF91
hsa-let-7a-5p	RUNX1T1
hsa-let-7a-5p	PCDH18
hsa-let-7a-5p	MPC1
hsa-let-7a-5p	TNFRSF10B
hsa-let-7a-5p	GFM2
hsa-let-7a-5p	SEC31A
hsa-let-7a-5p	ELMOD2
hsa-let-7a-5p	DHX34
hsa-let-7a-5p	PDE4DIP
hsa-let-7a-5p	HGNC:9982
hsa-let-7a-5p	APLNR
hsa-let-7a-5p	S100PBP
hsa-let-7a-5p	LRIG2
hsa-let-7a-5p	TOR1AIP2
hsa-let-7a-5p	MYBL2
hsa-let-7a-5p	SCAF1
hsa-let-7a-5p	HSP90AA1
hsa-let-7a-5p	SNRPC
hsa-let-7a-5p	NIPA2
hsa-let-7a-5p	ORMDL3
hsa-let-7a-5p	ARHGAP23
hsa-let-7a-5p	AKAP10
hsa-let-7a-5p	ZNF443
hsa-let-7a-5p	RRS1
hsa-let-7a-5p	SPEN
hsa-let-7a-5p	KLF11
hsa-let-7a-5p	KBTBD6
hsa-let-7a-5p	CKB
hsa-let-7a-5p	UQCRB
hsa-let-7a-5p	PPP2R5C
hsa-let-7a-5p	BTRC
hsa-let-7a-5p	ARL6IP1
hsa-let-7a-5p	CCDC127
hsa-let-7a-5p	PM20D2
hsa-let-7a-5p	SNX25
hsa-let-7a-5p	HOXC6
hsa-let-7a-5p	SOCS3
hsa-let-7a-5p	NKRF
hsa-let-7a-5p	AEN
hsa-let-7a-5p	ELFN1
hsa-let-7a-5p	FAM73A
hsa-let-7a-5p	BIRC2
hsa-let-7a-5p	ASB13
hsa-let-7a-5p	MYO18A
hsa-let-7a-5p	COPS3
hsa-let-7a-5p	WDR26
hsa-let-7a-5p	TM4SF1
hsa-let-7a-5p	2021-09-08
hsa-let-7a-5p	TMEM185B
hsa-let-7a-5p	KCNJ2
hsa-let-7a-5p	NDUFB4
hsa-let-7a-5p	C20orf24
hsa-let-7a-5p	TMEM165
hsa-let-7a-5p	VAV3
hsa-let-7a-5p	SBF1
hsa-let-7a-5p	JMY
hsa-let-7a-5p	SEC24A
hsa-let-7a-5p	CCER2
hsa-let-7a-5p	FAM122A
hsa-let-7a-5p	CDC27
hsa-let-7a-5p	NXF1
hsa-let-7a-5p	MAN2A2
hsa-let-7a-5p	SCAMP3
hsa-let-7a-5p	PBX1
hsa-let-7a-5p	ULK1
hsa-let-7a-5p	HSBP1L1
hsa-let-7a-5p	SYNM
hsa-let-7a-5p	FAM135A
hsa-let-7a-5p	SRSF10
hsa-let-7a-5p	RPL30
hsa-let-7a-5p	POLL
hsa-let-7a-5p	MAPK8
hsa-let-7a-5p	LYL1
hsa-let-7a-5p	REXO1
hsa-let-7a-5p	PTGS2
hsa-let-7a-5p	MOB3A
hsa-let-7a-5p	RNF217
hsa-let-7a-5p	UHRF1BP1
hsa-let-7a-5p	NT5C3B
hsa-let-7a-5p	ABCF2
hsa-let-7a-5p	LRP1
hsa-let-7a-5p	DNAJB11
hsa-let-7a-5p	CD81
hsa-let-7a-5p	DUSP3
hsa-let-7a-5p	TMEM65
hsa-let-7a-5p	PGRMC1
hsa-let-7a-5p	FIGN
hsa-let-7a-5p	AGO1
hsa-let-7a-5p	BBX
hsa-let-7a-5p	SYT7
hsa-let-7a-5p	REL
hsa-let-7a-5p	NME6
hsa-let-7a-5p	EFTUD2
hsa-let-7a-5p	SULF2
hsa-let-7a-5p	GPR45
hsa-let-7a-5p	PEX13
hsa-let-7a-5p	MTMR6
hsa-let-7a-5p	ZFP36L1
hsa-let-7a-5p	API5
hsa-let-7a-5p	SLC30A3
hsa-let-7a-5p	OTUD3
hsa-let-7a-5p	ICT1
hsa-let-7a-5p	MT-ATP8
hsa-let-7a-5p	TMEM138
hsa-let-7a-5p	DUSP22
hsa-let-7a-5p	GFOD2
hsa-let-7a-5p	PIK3IP1
hsa-let-7a-5p	C1orf43
hsa-let-7a-5p	GTF3C2
hsa-let-7a-5p	SLC44A2
hsa-let-7a-5p	POGK
hsa-let-7a-5p	BRD3
hsa-let-7a-5p	LRRC4B
hsa-let-7a-5p	UBIAD1
hsa-let-7a-5p	YWHAH
hsa-let-7a-5p	CYP46A1
hsa-let-7a-5p	MYH15
hsa-let-7a-5p	UBQLN2
hsa-let-7a-5p	MGAT5B
hsa-let-7a-5p	HNRNPA0
hsa-let-7a-5p	GNAI3
hsa-let-7a-5p	OS9
hsa-let-7a-5p	KLHDC3
hsa-let-7a-5p	MT-ND1
hsa-let-7a-5p	MTUS1
hsa-let-7a-5p	ARHGAP18
hsa-let-7a-5p	LHX1
hsa-let-7a-5p	LIN28A
hsa-let-7a-5p	TK1
hsa-let-7a-5p	CAD
hsa-let-7a-5p	FOXF2
hsa-let-7a-5p	ECE1
hsa-let-7a-5p	HNRNPA2B1
hsa-let-7a-5p	GOLGA3
hsa-let-7a-5p	ZBTB26
hsa-let-7a-5p	PCTP
hsa-let-7a-5p	NOLC1
hsa-let-7a-5p	UBAP1
hsa-let-7a-5p	PICALM
hsa-let-7a-5p	ANLN
hsa-let-7a-5p	MRPL22
hsa-let-7a-5p	MID1
hsa-let-7a-5p	UBE3B
hsa-let-7a-5p	EPC2
hsa-let-7a-5p	NRP1
hsa-let-7a-5p	DSEL
hsa-let-7a-5p	KLF7
hsa-let-7a-5p	MGAT1
hsa-let-7a-5p	PLEKHO1
hsa-let-7a-5p	HIST1H4D
hsa-let-7a-5p	DZIP1
hsa-let-7a-5p	UBR1
hsa-let-7a-5p	SLC12A7
hsa-let-7a-5p	NFE2L1
hsa-let-7a-5p	POLR2B
hsa-let-7a-5p	PLEKHA1
hsa-let-7a-5p	HSBP1
hsa-let-7a-5p	HMGXB4
hsa-let-7a-5p	UBXN8
hsa-let-7a-5p	GDE1
hsa-let-7a-5p	CTDNEP1
hsa-let-7a-5p	IFT57
hsa-let-7a-5p	SYNJ2
hsa-let-7a-5p	RAP1GDS1
hsa-let-7a-5p	PIGW
hsa-let-7a-5p	SALL4
hsa-let-7a-5p	GBE1
hsa-let-7a-5p	ANK3
hsa-let-7a-5p	CD200R1
hsa-let-7a-5p	QSOX2
hsa-let-7a-5p	APBA1
hsa-let-7a-5p	CPSF7
hsa-let-7a-5p	ADNP
hsa-let-7a-5p	ATP6V1B2
hsa-let-7a-5p	ALDH1L2
hsa-let-7a-5p	HTATIP2
hsa-let-7a-5p	ARL4C
hsa-let-7a-5p	ARL5A
hsa-let-7a-5p	CEP135
hsa-let-7a-5p	CCDC51
hsa-let-7a-5p	GFM1
hsa-let-7a-5p	FAM120A
hsa-let-7a-5p	CTSC
hsa-let-7a-5p	ZBTB7B
hsa-let-7a-5p	AGO2
hsa-let-7a-5p	MSH2
hsa-let-7a-5p	SLC16A9
hsa-let-7a-5p	B4GALT5
hsa-let-7a-5p	2021-09-09
hsa-let-7a-5p	KAZN
hsa-let-7a-5p	ZSCAN22
hsa-let-7a-5p	KCTD5
hsa-let-7a-5p	PCNXL4
hsa-let-7a-5p	C17orf80
hsa-let-7a-5p	PRDM5
hsa-let-7a-5p	FADS3
hsa-let-7a-5p	MED8
hsa-let-7a-5p	PCNP
hsa-let-7a-5p	KIF2A
hsa-let-7a-5p	TRAPPC10
hsa-let-7a-5p	TPR
hsa-let-7a-5p	PAFAH1B2
hsa-let-7a-5p	DNAH1
hsa-let-7a-5p	MARK2
hsa-let-7a-5p	KAT5
hsa-let-7a-5p	ZNF567
hsa-let-7a-5p	THEM6
hsa-let-7a-5p	DIABLO
hsa-let-7a-5p	MAST1
hsa-let-7a-5p	COQ10B
hsa-let-7a-5p	ERGIC3
hsa-let-7a-5p	COX14
hsa-let-7a-5p	PEX11B
hsa-let-7a-5p	NFAT5
hsa-let-7a-5p	HUWE1
hsa-let-7a-5p	EGLN1
hsa-let-7a-5p	GDI1
hsa-let-7a-5p	MKRN1
hsa-let-7a-5p	LDOC1L
hsa-let-7a-5p	CCND1
hsa-let-7a-5p	IRGQ
hsa-let-7a-5p	TAOK1
hsa-let-7a-5p	PNKD
hsa-let-7a-5p	YWHAZ
hsa-let-7a-5p	APH1A
hsa-let-7a-5p	C15orf39
hsa-let-7a-5p	ALAS1
hsa-let-7a-5p	PIGP
hsa-let-7a-5p	CCDC71L
hsa-let-7a-5p	ZNF264
hsa-let-7a-5p	TSC22D2
hsa-let-7a-5p	XPOT
hsa-let-7a-5p	PXT1
hsa-let-7a-5p	DCUN1D2
hsa-let-7a-5p	TRIM28
hsa-let-7a-5p	RNF111
hsa-let-7a-5p	FSTL1
hsa-let-7a-5p	AFAP1L1
hsa-let-7a-5p	PSD3
hsa-let-7a-5p	GLS
hsa-let-7a-5p	PLEC
hsa-let-7a-5p	PLCXD1
hsa-let-7a-5p	RDH10
hsa-let-7a-5p	CCDC15
hsa-let-7a-5p	WDR13
hsa-let-7a-5p	ZFP92
hsa-let-7a-5p	NOVA2
hsa-let-7a-5p	BMP6
hsa-let-7a-5p	INTU
hsa-let-7a-5p	MICU1
hsa-let-7a-5p	NRBF2
hsa-let-7a-5p	EMC4
hsa-let-7a-5p	PLXNA1
hsa-let-7a-5p	HMMR
hsa-let-7a-5p	SPATA2
hsa-let-7a-5p	FAM35A
hsa-let-7a-5p	CPA4
hsa-let-7a-5p	XK
hsa-let-7a-5p	MTHFD2
hsa-let-7a-5p	SLC27A4
hsa-let-7a-5p	ITPR3
hsa-let-7a-5p	PDPR
hsa-let-7a-5p	ANO2
hsa-let-7a-5p	PSMD8
hsa-let-7a-5p	COIL
hsa-let-7a-5p	MAP3K2
hsa-let-7a-5p	FBXL19
hsa-let-7a-5p	EIF4ENIF1
hsa-let-7a-5p	PDGFB
hsa-let-7a-5p	PSME4
hsa-let-7a-5p	SRC
hsa-let-7a-5p	ANP32A
hsa-let-7a-5p	ASF1B
hsa-let-7a-5p	AURKA
hsa-let-7a-5p	AMMECR1L
hsa-let-7a-5p	POLR3A
hsa-let-7a-5p	H6PD
hsa-let-7a-5p	BRF2
hsa-let-7a-5p	SLC16A14
hsa-let-7a-5p	UHMK1
hsa-let-7a-5p	NOTCH2
hsa-let-7a-5p	BUD31
hsa-let-7a-5p	MGAT4A
hsa-let-7a-5p	NPLOC4
hsa-let-7a-5p	RPS6KA5
hsa-let-7a-5p	OTUD7B
hsa-let-7a-5p	ZNF587
hsa-let-7a-5p	NT5C2
hsa-let-7a-5p	CS
hsa-let-7a-5p	ANKMY2
hsa-let-7a-5p	MAP4K3
hsa-let-7a-5p	VPS25
hsa-let-7a-5p	HSPA8
hsa-let-7a-5p	RBFOX2
hsa-let-7a-5p	FEM1C
hsa-let-7a-5p	GPBP1L1
hsa-let-7a-5p	PCDH9
hsa-let-7a-5p	RAE1
hsa-let-7a-5p	VAMP3
hsa-let-7a-5p	TOB1
hsa-let-7a-5p	NOTCH4
hsa-let-7a-5p	FRS2
hsa-let-7a-5p	PRKAR1B
hsa-let-7a-5p	VPS53
hsa-let-7a-5p	VKORC1
hsa-let-7a-5p	TEAD4
hsa-let-7a-5p	FOXA1
hsa-let-7a-5p	TRIO
hsa-let-7a-5p	ORC2
hsa-let-7a-5p	ACSL3
hsa-let-7a-5p	THOC2
hsa-let-7a-5p	RAP2A
hsa-let-7a-5p	NPEPPS
hsa-let-7a-5p	ACTA2
hsa-let-7a-5p	NCR3LG1
hsa-let-7a-5p	RPF1
hsa-let-7a-5p	ZBTB32
hsa-let-7a-5p	ERO1L
hsa-let-7a-5p	ACE
hsa-let-7a-5p	RAB5C
hsa-let-7a-5p	RPL8
hsa-let-7a-5p	F2R
hsa-let-7a-5p	MTUS2
hsa-let-7a-5p	FBXO11
hsa-let-7a-5p	SOGA1
hsa-let-7a-5p	KIAA0141
hsa-let-7a-5p	EIF3F
hsa-let-7a-5p	C6orf211
hsa-let-7a-5p	ERC1
hsa-let-7a-5p	PKD1
hsa-let-7a-5p	OMG
hsa-let-7a-5p	PON2
hsa-let-7a-5p	CREBBP
hsa-let-7a-5p	MAP4
hsa-let-7a-5p	FBXL7
hsa-let-7a-5p	KPNA2
hsa-let-7a-5p	ECHDC1
hsa-let-7a-5p	ATP6V1A
hsa-let-7a-5p	NR1D2
hsa-let-7a-5p	PODXL2
hsa-let-7a-5p	ASCC2
hsa-let-7a-5p	COX7A2L
hsa-let-7a-5p	XPO6
hsa-let-7a-5p	TIMM23
hsa-let-7a-5p	SERPINA3
hsa-let-7a-5p	ZNF598
hsa-let-7a-5p	SLC5A3
hsa-let-7a-5p	KDM2A
hsa-let-7a-5p	FOXP2
hsa-let-7a-5p	MUC16
hsa-let-7a-5p	ASCC3
hsa-let-7a-5p	AHNAK
hsa-let-7a-5p	MAGEB1
hsa-let-7a-5p	NAPG
hsa-let-7a-5p	RICTOR
hsa-let-7a-5p	KPNA6
hsa-let-7a-5p	B4GALT3
hsa-let-7a-5p	ACTB
hsa-let-7a-5p	ZNF140
hsa-let-7a-5p	NFIC
hsa-let-7a-5p	AKAP8
hsa-let-7a-5p	NEFL
hsa-let-7a-5p	FAM220A
hsa-let-7a-5p	SSH2
hsa-let-7a-5p	MIDN
hsa-let-7a-5p	RIPK2
hsa-let-7a-5p	RNF145
hsa-let-7a-5p	ATF2
hsa-let-7a-5p	MIEF1
hsa-let-7a-5p	PSMB3
hsa-let-7a-5p	MKLN1
hsa-let-7a-5p	ELAVL1
hsa-let-7a-5p	MBTPS2
hsa-let-7a-5p	NDUFS2
hsa-let-7a-5p	TSC1
hsa-let-7a-5p	LYPLA2
hsa-let-7a-5p	LEPROT
hsa-let-7a-5p	GNPTAB
hsa-let-7a-5p	AKR1A1
hsa-let-7a-5p	ZDHHC12
hsa-let-7a-5p	SEMA6B
hsa-let-7a-5p	KIAA1549
hsa-let-7a-5p	GNB2
hsa-let-7a-5p	HIF3A
hsa-let-7a-5p	PREX1
hsa-let-7a-5p	FAM195A
hsa-let-7a-5p	PRKAA2
hsa-let-7a-5p	CHD3
hsa-let-7a-5p	CRYBG3
hsa-let-7a-5p	EXTL3
hsa-let-7a-5p	RNPS1
hsa-let-7a-5p	ZNF71
hsa-let-7a-5p	TNKS2
hsa-let-7a-5p	BVES
hsa-let-7a-5p	ARNT2
hsa-let-7a-5p	GMFB
hsa-let-7a-5p	NAV2
hsa-let-7a-5p	ATP11C
hsa-let-7a-5p	RNASEH2B
hsa-let-7a-5p	ABI1
hsa-let-7a-5p	RPRD2
hsa-let-7a-5p	ARHGEF2
hsa-let-7a-5p	H3F3B
hsa-let-7a-5p	ZNF8
hsa-let-7a-5p	APC
hsa-let-7a-5p	NCOA6
hsa-let-7a-5p	RPS27
hsa-let-7a-5p	HNRNPM
hsa-let-7a-5p	MRGBP
hsa-let-7a-5p	ZNF460
hsa-let-7a-5p	TIE1
hsa-let-7a-5p	YME1L1
hsa-let-7a-5p	CNTRL
hsa-let-7a-5p	ZNF511
hsa-let-7a-5p	GPR157
hsa-let-7a-5p	DIP2B
hsa-let-7a-5p	MEF2D
hsa-let-7a-5p	ALCAM
hsa-let-7a-5p	STK40
hsa-let-7a-5p	NUAK1
hsa-let-7a-5p	APPBP2
hsa-let-7a-5p	COTL1
hsa-let-7a-5p	MYOF
hsa-let-7a-5p	TRIM32
hsa-let-7a-5p	ZNF121
hsa-let-7a-5p	DDB1
hsa-let-7a-5p	TBK1
hsa-let-7a-5p	HPRT1
hsa-let-7a-5p	VANGL1
hsa-let-7a-5p	HIF1AN
hsa-let-7a-5p	KTI12
hsa-let-7a-5p	ARIH1
hsa-let-7a-5p	DIDO1
hsa-let-7a-5p	PTPRU
hsa-let-7a-5p	CSNK1G3
hsa-let-7a-5p	TRMT1L
hsa-let-7a-5p	AP3S2
hsa-let-7a-5p	ZSWIM8
hsa-let-7a-5p	CALD1
hsa-let-7a-5p	XRCC1
hsa-let-7a-5p	ANKFY1
hsa-let-7a-5p	RPS14
hsa-let-7a-5p	LRGUK
hsa-let-7a-5p	ARRB1
hsa-let-7a-5p	GGNBP2
hsa-let-7a-5p	SH3GLB1
hsa-let-7a-5p	PYGB
hsa-let-7a-5p	EIF2S3
hsa-let-7a-5p	SUV420H1
hsa-let-7a-5p	SYNPO2
hsa-let-7a-5p	LMNB1
hsa-let-7a-5p	RGL2
hsa-let-7a-5p	YTHDF1
hsa-let-7a-5p	LRRC8A
hsa-let-7a-5p	TMEM63A
hsa-let-7a-5p	ZFP14
hsa-let-7a-5p	FBXW2
hsa-let-7a-5p	TIAM1
hsa-let-7a-5p	JAK1
hsa-let-7a-5p	SOX4
hsa-let-7a-5p	PHF10
hsa-let-7a-5p	CEP97
hsa-let-7a-5p	SEC14L1
hsa-let-7a-5p	SLC9A3R1
hsa-let-7a-5p	ALOX5
hsa-let-7a-5p	DENND6A
hsa-let-7a-5p	PPFIA1
hsa-let-7a-5p	OSTF1
hsa-let-7a-5p	GLRX5
hsa-let-7a-5p	UTP14A
hsa-let-7a-5p	ZNF532
hsa-let-7a-5p	NEDD4L
hsa-let-7a-5p	BCL2L11
hsa-let-7a-5p	NUMA1
hsa-let-7a-5p	RFK
hsa-let-7a-5p	HERPUD2
hsa-let-7a-5p	IMPAD1
hsa-let-7a-5p	ENC1
hsa-let-7a-5p	FAM171B
hsa-let-7a-5p	PLS3
hsa-let-7a-5p	MRPS16
hsa-let-7a-5p	SPHK1
hsa-let-7a-5p	GPCPD1
hsa-let-7a-5p	DOCK7
hsa-let-7a-5p	RHBDF2
hsa-let-7a-5p	CDK9
hsa-let-7a-5p	SRGN
hsa-let-7a-5p	PIM1
hsa-let-7a-5p	MKI67
hsa-let-7a-5p	HMGXB3
hsa-let-7a-5p	GBF1
hsa-let-7a-5p	SMAP1
hsa-let-7a-5p	FAS
hsa-let-7a-5p	PSMC4
hsa-let-7a-5p	SRM
hsa-let-7a-5p	EIF3D
hsa-let-7a-5p	MFSD5
hsa-let-7a-5p	ERGIC1
hsa-let-7a-5p	WNK2
hsa-let-7a-5p	TIA1
hsa-let-7a-5p	FAM189A1
hsa-let-7a-5p	EDEM2
hsa-let-7a-5p	TXN
hsa-let-7a-5p	MAP3K10
hsa-let-7a-5p	USO1
hsa-let-7a-5p	FAM217B
hsa-let-7a-5p	GPR85
hsa-let-7a-5p	BAG4
hsa-let-7a-5p	NAA50
hsa-let-7a-5p	CHST3
hsa-let-7a-5p	CD80
hsa-let-7a-5p	DDX19A
hsa-let-7a-5p	SGOL1
hsa-let-7a-5p	CBLL1
hsa-let-7a-5p	C11orf84
hsa-let-7a-5p	FGD6
hsa-let-7a-5p	ZNF24
hsa-let-7a-5p	LRRC4
hsa-let-7a-5p	PANK2
hsa-let-7a-5p	FBXO6
hsa-let-7a-5p	FOXRED1
hsa-let-7a-5p	PLCB3
hsa-let-7a-5p	C1orf21
hsa-let-7a-5p	FBXW5
hsa-let-7a-5p	WBP1L
hsa-let-7a-5p	BICC1
hsa-let-7a-5p	WDR48
hsa-let-7a-5p	SDE2
hsa-let-7a-5p	SLC25A39
hsa-let-7a-5p	PALB2
hsa-let-7a-5p	COL3A1
hsa-let-7a-5p	GORASP2
hsa-let-7a-5p	CDC42EP2
hsa-let-7a-5p	NFE2L3
hsa-let-7a-5p	B3GALNT1
hsa-let-7a-5p	TRANK1
hsa-let-7a-5p	PMP22
hsa-let-7a-5p	KLHL15
hsa-let-7a-5p	ZNF449
hsa-let-7a-5p	TUBB
hsa-let-7a-5p	ZNF629
hsa-let-7a-5p	DNAJC6
hsa-let-7a-5p	GATAD2A
hsa-let-7a-5p	C1D
hsa-let-7a-5p	HCN2
hsa-let-7a-5p	CMAS
hsa-let-7a-5p	RPSA
hsa-let-7a-5p	PTPLB
hsa-let-7a-5p	COX8A
hsa-let-7a-5p	TM7SF2
hsa-let-7a-5p	RBM11
hsa-let-7a-5p	ABL2
hsa-let-7a-5p	C22orf29
hsa-let-7a-5p	KDM6B
hsa-let-7a-5p	RNF149
hsa-let-7a-5p	KAT6A
hsa-let-7a-5p	ASPM
hsa-let-7a-5p	CHST9
hsa-let-7a-5p	TRAK1
hsa-let-7a-5p	NDRG3
hsa-let-7a-5p	SF3A2
hsa-let-7a-5p	C9orf40
hsa-let-7a-5p	FBXO32
hsa-let-7a-5p	MAD2L1
hsa-let-7a-5p	PTPN23
hsa-let-7a-5p	PPP6R3
hsa-let-7a-5p	HCFC2
hsa-let-7a-5p	ETV3
hsa-let-7a-5p	CSRNP3
hsa-let-7a-5p	LPPR4
hsa-let-7a-5p	SNX16
hsa-let-7a-5p	GPR63
hsa-let-7a-5p	LMNA
hsa-let-7a-5p	MTCL1
hsa-let-7a-5p	DPYSL5
hsa-let-7a-5p	EPHA2
hsa-let-7a-5p	SPOCK1
hsa-let-7a-5p	ARL5B
hsa-let-7a-5p	ZNF695
hsa-let-7a-5p	DMKN
hsa-let-7a-5p	ATP1B3
hsa-let-7a-5p	RAB12
hsa-let-7a-5p	SEC63
hsa-let-7a-5p	SLC39A9
hsa-let-7a-5p	SLC35F6
hsa-let-7a-5p	NMD3
hsa-let-7a-5p	TCEAL2
hsa-let-7a-5p	ACAD9
hsa-let-7a-5p	YAP1
hsa-let-7a-5p	RHOF
hsa-let-7a-5p	ZSWIM4
hsa-let-7a-5p	NUP43
hsa-let-7a-5p	TLR4
hsa-let-7a-5p	GPHN
hsa-let-7a-5p	ZNF384
hsa-let-7a-5p	ZC3H11A
hsa-let-7a-5p	IGF2BP3
hsa-let-7a-5p	TRPM7
hsa-let-7a-5p	MIER3
hsa-let-7a-5p	G6PD
hsa-let-7a-5p	CEP170B
hsa-let-7a-5p	ZNF691
hsa-let-7a-5p	RAB3GAP2
hsa-let-7a-5p	C10orf88
hsa-let-7a-5p	PYGO1
hsa-let-7a-5p	FZD3
hsa-let-7a-5p	MYO5A
hsa-let-7a-5p	DHCR24
hsa-let-7a-5p	AGAP3
hsa-let-7a-5p	ZNF622
hsa-let-7a-5p	ZNF566
hsa-let-7a-5p	ZBTB39
hsa-let-7a-5p	KLF10
hsa-let-7a-5p	ZBTB5
hsa-let-7a-5p	MYC
hsa-let-7a-5p	CAMSAP1
hsa-let-7a-5p	ADRB2
hsa-let-7a-5p	EFHD2
hsa-let-7a-5p	THG1L
hsa-let-7a-5p	DCAF15
hsa-let-7a-5p	NBPF1
hsa-let-7a-5p	SYNE1
hsa-let-7a-5p	DEGS1
hsa-let-7a-5p	SLC35C1
hsa-let-7a-5p	COX10
hsa-let-7a-5p	MBNL2
hsa-let-7a-5p	MAGI2
hsa-let-7a-5p	C8orf58
hsa-let-7a-5p	YY1
hsa-let-7a-5p	SLC25A13
hsa-let-7a-5p	PIGT
hsa-let-7a-5p	TUBG1
hsa-let-7a-5p	SMG5
hsa-let-7a-5p	MRPS2
hsa-let-7a-5p	TRAPPC12
hsa-let-7a-5p	CPD
hsa-let-7a-5p	CABLES1
hsa-let-7a-5p	TMEM106A
hsa-let-7a-5p	RNF41
hsa-let-7a-5p	ACOX1
hsa-let-7a-5p	ATP2B2
hsa-let-7a-5p	FOXO1
hsa-let-7a-5p	GTF3C1
hsa-let-7a-5p	FLNA
hsa-let-7a-5p	EMP1
hsa-let-7a-5p	WBSCR17
hsa-let-7a-5p	DPF2
hsa-let-7a-5p	MEN1
hsa-let-7a-5p	ARID1A
hsa-let-7a-5p	BEND4
hsa-let-7a-5p	ZBTB37
hsa-let-7a-5p	MVK
hsa-let-7a-5p	WDR37
hsa-let-7a-5p	DLGAP4
hsa-let-7a-5p	SF3B2
hsa-let-7a-5p	ZNF516
hsa-let-7a-5p	PI4KB
hsa-let-7a-5p	CNNM4
hsa-let-7a-5p	USP9X
hsa-let-7a-5p	POMT2
hsa-let-7a-5p	C1orf85
hsa-let-7a-5p	ATP6V0E1
hsa-let-7a-5p	CHD7
hsa-let-7a-5p	LRRC41
hsa-let-7a-5p	NR4A2
hsa-let-7a-5p	BPTF
hsa-let-7a-5p	COL4A1
hsa-let-7a-5p	TGM2
hsa-let-7a-5p	CHTF8
hsa-let-7a-5p	SECISBP2L
hsa-let-7a-5p	C7orf55-LUC7L2
hsa-let-7a-5p	TOR1A
hsa-let-7a-5p	SOX5
hsa-let-7a-5p	AKAP6
hsa-let-7a-5p	SH3RF3
hsa-let-7a-5p	LRIG1
hsa-let-7a-5p	MPDZ
hsa-let-7a-5p	CHTF18
hsa-let-7a-5p	FRYL
hsa-let-7a-5p	SIL1
hsa-let-7a-5p	LIMD1
hsa-let-7a-5p	SH3TC1
hsa-let-7a-5p	CDKN1B
hsa-let-7a-5p	ZNF260
hsa-let-7a-5p	GRPEL1
hsa-let-7a-5p	GRIN2B
hsa-let-7a-5p	FUS
hsa-let-7a-5p	YTHDC2
hsa-let-7a-5p	KCNC2
hsa-let-7a-5p	DOLK
hsa-let-7a-5p	RAB40C
hsa-let-7a-5p	STAU1
hsa-let-7a-5p	FLII
hsa-let-7a-5p	GRAMD1A
hsa-let-7a-5p	DNAJC13
hsa-let-7a-5p	CUEDC2
hsa-let-7a-5p	RTN4RL2
hsa-let-7a-5p	CTPS2
hsa-let-7a-5p	SPHK2
hsa-let-7a-5p	CCNE2
hsa-let-7a-5p	DHX30
hsa-let-7a-5p	UBE2I
hsa-let-7a-5p	MTPN
hsa-let-7a-5p	RP11-201K10.3
hsa-let-7a-5p	ICOSLG
hsa-let-7a-5p	HSPG2
hsa-let-7a-5p	GPR180
hsa-let-7a-5p	CNOT1
hsa-let-7a-5p	WDR41
hsa-let-7a-5p	ADAMTS1
hsa-let-7a-5p	TRAK2
hsa-let-7a-5p	LRCH4
hsa-let-7a-5p	SRRD
hsa-let-7a-5p	CHPF2
hsa-let-7a-5p	ZNF385A
hsa-let-7a-5p	LIPH
hsa-let-7a-5p	RALGAPA2
hsa-let-7a-5p	CDIP1
hsa-let-7a-5p	SLC35A2
hsa-let-7a-5p	USP14
hsa-let-7a-5p	LAMC1
hsa-let-7a-5p	PHLDB2
hsa-let-7a-5p	ANKRD50
hsa-let-7a-5p	ANGPTL2
hsa-let-7a-5p	TACC3
hsa-let-7a-5p	ELK4
hsa-let-7a-5p	GORAB
hsa-let-7a-5p	PGM2L1
hsa-let-7a-5p	MAP1B
hsa-let-7a-5p	LASP1
hsa-let-7a-5p	SAMD4B
hsa-let-7a-5p	GRPEL2
hsa-let-7a-5p	SMAD1
hsa-let-7a-5p	RBBP6
hsa-let-7a-5p	FASTKD5
hsa-let-7a-5p	MTR
hsa-let-7a-5p	RBPJ
hsa-let-7a-5p	TRIM41
hsa-let-7a-5p	NMNAT1
hsa-let-7a-5p	ZNF507
hsa-let-7a-5p	NCOA2
hsa-let-7a-5p	TTLL9
hsa-let-7a-5p	ENTHD2
hsa-let-7a-5p	UQCR10
hsa-let-7a-5p	C5orf24
hsa-let-7a-5p	TFIP11
hsa-let-7a-5p	CNBP
hsa-let-7a-5p	HIST1H2BG
hsa-let-7a-5p	PIEZO1
hsa-let-7a-5p	TTC26
hsa-let-7a-5p	ANKRD13A
hsa-let-7a-5p	ICMT
hsa-let-7a-5p	HIAT1
hsa-let-7a-5p	HDAC3
hsa-let-7a-5p	RGS3
hsa-let-7a-5p	DUSP10
hsa-let-7a-5p	ATP2B1
hsa-let-7a-5p	VAPA
hsa-let-7a-5p	CHML
hsa-let-7a-5p	UBR2
hsa-let-7a-5p	MESDC1
hsa-let-7a-5p	ANKLE2
hsa-let-7a-5p	ISCU
hsa-let-7a-5p	NMT1
hsa-let-7a-5p	NAGA
hsa-let-7a-5p	RHOBTB3
hsa-let-7a-5p	TMEM245
hsa-let-7a-5p	NHP2L1
hsa-let-7a-5p	FN1
hsa-let-7a-5p	ARHGEF9
hsa-let-7a-5p	ZNF317
hsa-let-7a-5p	RAD54L
hsa-let-7a-5p	MT-ATP6
hsa-let-7a-5p	PRKAG1
hsa-let-7a-5p	ZNF292
hsa-let-7a-5p	RTKN
hsa-let-7a-5p	ZNF142
hsa-let-7a-5p	OSGEPL1
hsa-let-7a-5p	SESN3
hsa-let-7a-5p	DNAJA2
hsa-let-7a-5p	TEAD1
hsa-let-7a-5p	PLCG1
hsa-let-7a-5p	FBXO17
hsa-let-7a-5p	AGAP1
hsa-let-7a-5p	PHLDA3
hsa-let-7a-5p	ZNF562
hsa-let-7a-5p	FMNL3
hsa-let-7a-5p	SOD2
hsa-let-7a-5p	MORC3
hsa-let-7a-5p	MYLK3
hsa-let-7a-5p	SLC35B4
hsa-let-7a-5p	KCNJ10
hsa-let-7a-5p	LIN7C
hsa-let-7a-5p	ZNF217
hsa-let-7a-5p	PTPRB
hsa-let-7a-5p	SURF4
hsa-let-7a-5p	SOCS7
hsa-let-7a-5p	HOXD10
hsa-let-7a-5p	SF3B4
hsa-let-7a-5p	ZFHX3
hsa-let-7a-5p	PCDHGC5
hsa-let-7a-5p	DHPS
hsa-let-7a-5p	ZNF620
hsa-let-7a-5p	CENPA
hsa-let-7a-5p	CYC1
hsa-let-7a-5p	MLLT10
hsa-let-7a-5p	ABCA2
hsa-let-7a-5p	PLCB4
hsa-let-7a-5p	IDH2
hsa-let-7a-5p	DMXL1
hsa-let-7a-5p	PHC2
hsa-let-7a-5p	SEC24C
hsa-let-7a-5p	IFNLR1
hsa-let-7a-5p	MBD4
hsa-let-7a-5p	SERPINH1
hsa-let-7a-5p	SLC22A17
hsa-let-7a-5p	NUP155
hsa-let-7a-5p	SERINC5
hsa-let-7a-5p	C17orf51
hsa-let-7a-5p	AP2S1
hsa-let-7a-5p	CRNKL1
hsa-let-7a-5p	CDCA8
hsa-let-7a-5p	CDC42SE1
hsa-let-7a-5p	LDB2
hsa-let-7a-5p	P4HA2
hsa-let-7a-5p	WNT5A
hsa-let-7a-5p	RNFT1
hsa-let-7a-5p	URM1
hsa-let-7a-5p	STAMBP
hsa-let-7a-5p	CCT8
hsa-let-7a-5p	SOX18
hsa-let-7a-5p	NUP98
hsa-let-7a-5p	MAP3K3
hsa-let-7a-5p	GPRIN3
hsa-let-7a-5p	ZNF638
hsa-let-7a-5p	VWA9
hsa-let-7a-5p	LGALS3BP
hsa-let-7a-5p	SLC38A7
hsa-let-7a-5p	TLN1
hsa-let-7a-5p	NFATC3
hsa-let-7a-5p	DSP
hsa-let-7a-5p	RNF6
hsa-let-7a-5p	ZNF510
hsa-let-7a-5p	CCL7
hsa-let-7a-5p	KREMEN1
hsa-let-7a-5p	B4GALT1
hsa-let-7a-5p	RNMT
hsa-let-7a-5p	AGO4
hsa-let-7a-5p	FGFR1
hsa-let-7a-5p	PPIF
hsa-let-7a-5p	RAB11A
hsa-let-7a-5p	ARRDC1-AS1
hsa-let-7a-5p	GCNT2
hsa-let-7a-5p	LIMS1
hsa-let-7a-5p	USP24
hsa-let-7a-5p	PLEKHH1
hsa-let-7a-5p	MCM7
hsa-let-7a-5p	FZD8
hsa-let-7a-5p	CDK16
hsa-let-7a-5p	LGR4
hsa-let-7a-5p	HEG1
hsa-let-7a-5p	MTX3
hsa-let-7a-5p	JMJD4
hsa-let-7a-5p	C14orf169
hsa-let-7a-5p	GAS7
hsa-let-7a-5p	GNL3
hsa-let-7a-5p	MET
hsa-let-7a-5p	LEPRE1
hsa-let-7a-5p	ATXN1L
hsa-let-7a-5p	MCM3
hsa-let-7a-5p	CNIH1
hsa-let-7a-5p	BTBD3
hsa-let-7a-5p	MED21
hsa-let-7a-5p	FNIP2
hsa-let-7a-5p	PDS5A
hsa-let-7a-5p	NOP10
hsa-let-7a-5p	PTPN4
hsa-let-7a-5p	HOOK1
hsa-let-7a-5p	ALG3
hsa-let-7a-5p	SUV420H2
hsa-let-7a-5p	CALM1
hsa-let-7a-5p	YIPF5
hsa-let-7a-5p	FGFRL1
hsa-let-7a-5p	SCML1
hsa-let-7a-5p	IMMT
hsa-let-7a-5p	MAML1
hsa-let-7a-5p	HNRNPF
hsa-let-7a-5p	BTG2
hsa-let-7a-5p	SMAD7
hsa-let-7a-5p	ZNF25
hsa-let-7a-5p	TTLL7
hsa-let-7a-5p	ZDHHC6
hsa-let-7a-5p	PTGES2
hsa-let-7a-5p	ID2
hsa-let-7a-5p	ITM2C
hsa-let-7a-5p	VAV2
hsa-let-7a-5p	RNF8
hsa-let-7a-5p	EIF3C
hsa-let-7a-5p	ODC1
hsa-let-7a-5p	DNAJC21
hsa-let-7a-5p	ARSK
hsa-let-7a-5p	FAM208A
hsa-let-7a-5p	ZNF280B
hsa-let-7a-5p	IST1
hsa-let-7a-5p	HNRNPL
hsa-let-7a-5p	PSMD14
hsa-let-7a-5p	SAMD5
hsa-let-7a-5p	C1QBP
hsa-let-7a-5p	POGZ
hsa-let-7a-5p	ASPH
hsa-let-7a-5p	CEMIP
hsa-let-7a-5p	NANS
hsa-let-7a-5p	SPCS3
hsa-let-7a-5p	FBXW11
hsa-let-7a-5p	IMP4
hsa-let-7a-5p	WDR24
hsa-let-7a-5p	KCTD16
hsa-let-7a-5p	HOMER2
hsa-let-7a-5p	UBE2K
hsa-let-7a-5p	EIF4E2
hsa-let-7a-5p	RBM10
hsa-let-7a-5p	PLXND1
hsa-let-7a-5p	TMEM194A
hsa-let-7a-5p	CTD-2368P22.1
hsa-let-7a-5p	SERTAD2
hsa-let-7a-5p	ZDHHC23
hsa-let-7a-5p	PTCHD1
hsa-let-7a-5p	MON2
hsa-let-7a-5p	CTC-534A2.2
hsa-let-7a-5p	PXDN
hsa-let-7a-5p	MRPL17
hsa-let-7a-5p	ACTR3
hsa-let-7a-5p	NDUFB11
hsa-let-7a-5p	TBRG4
hsa-let-7a-5p	PFKFB3
hsa-let-7a-5p	MAP1A
hsa-let-7a-5p	SLC37A3
hsa-let-7a-5p	GNAI1
hsa-let-7a-5p	KHSRP
hsa-let-7a-5p	IFI44L
hsa-let-7a-5p	FHDC1
hsa-let-7a-5p	POLR2A
hsa-let-7a-5p	EIF2AK1
hsa-let-7a-5p	TMBIM6
hsa-let-7a-5p	CHD6
hsa-let-7a-5p	PAFAH1B1
hsa-let-7a-5p	LFNG
hsa-let-7a-5p	FBXO22
hsa-let-7a-5p	HNRNPH2
hsa-let-7a-5p	HBP1
hsa-let-7a-5p	ERF
hsa-let-7a-5p	THRA
hsa-let-7a-5p	PUM2
hsa-let-7a-5p	TUB
hsa-let-7a-5p	NAA30
hsa-let-7a-5p	MAL2
hsa-let-7a-5p	SUPT4H1
hsa-let-7a-5p	SIKE1
hsa-let-7a-5p	PGS1
hsa-let-7a-5p	TTC17
hsa-let-7a-5p	PARS2
hsa-let-7a-5p	TMC7
hsa-let-7a-5p	DUSP6
hsa-let-7a-5p	NCKAP5L
hsa-let-7a-5p	CBL
hsa-let-7a-5p	TRAM2
hsa-let-7a-5p	SLC9A6
hsa-let-7a-5p	CXXC5
hsa-let-7a-5p	CSDE1
hsa-let-7a-5p	TTLL11
hsa-let-7a-5p	SERP1
hsa-let-7a-5p	GPR26
hsa-let-7a-5p	AMOT
hsa-let-7a-5p	ZNF267
hsa-let-7a-5p	HMGCS1
hsa-let-7a-5p	SMG1
hsa-let-7a-5p	UTRN
hsa-let-7a-5p	ZNF141
hsa-let-7a-5p	XRN1
hsa-let-7a-5p	ZNF689
hsa-let-7a-5p	ABCC10
hsa-let-7a-5p	LONP2
hsa-let-7a-5p	GNS
hsa-let-7a-5p	CHUK
hsa-let-7a-5p	DENND5A
hsa-let-7a-5p	ENSG00000255103
hsa-let-7a-5p	MRPL33
hsa-let-7a-5p	CDCA4
hsa-let-7a-5p	SLC38A2
hsa-let-7a-5p	TCF7L2
hsa-let-7a-5p	KCNA2
hsa-let-7a-5p	TP53BP1
hsa-let-7a-5p	TMEM173
hsa-let-7a-5p	PDZD2
hsa-let-7a-5p	SEL1L
hsa-let-7a-5p	KAT2A
hsa-let-7a-5p	FLCN
hsa-let-7a-5p	CFL2
hsa-let-7a-5p	COPB2
hsa-let-7a-5p	PHACTR4
hsa-let-7a-5p	PRKDC
hsa-let-7a-5p	FANCM
hsa-let-7a-5p	DNAJC27
hsa-let-7a-5p	IFITM10
hsa-let-7a-5p	RGS16
hsa-let-7a-5p	CCNJL
hsa-let-7a-5p	DUSP4
hsa-let-7a-5p	EGR1
hsa-let-7a-5p	POLD3
hsa-let-7a-5p	TNFAIP1
hsa-let-7a-5p	USP10
hsa-let-7a-5p	KBTBD8
hsa-let-7a-5p	MTDH
hsa-let-7a-5p	NLK
hsa-let-7a-5p	PLK2
hsa-let-7a-5p	ZNF195
hsa-let-7a-5p	ATF6B
hsa-let-7a-5p	MFSD4
hsa-let-7a-5p	PHF19
hsa-let-7a-5p	ZNF551
hsa-let-7a-5p	UAP1
hsa-let-7a-5p	ZMAT3
hsa-let-7a-5p	STRAP
hsa-let-7a-5p	ANP32E
hsa-let-7a-5p	DNM2
hsa-let-7a-5p	CCT3
hsa-let-7a-5p	DPH2
hsa-let-7a-5p	RBPMS
hsa-let-7a-5p	ZBED4
hsa-let-7a-5p	MYCBP2
hsa-let-7a-5p	YTHDF3
hsa-let-7a-5p	NR2C2
hsa-let-7a-5p	PLOD2
hsa-let-7a-5p	EMC1
hsa-let-7a-5p	TSPAN14
hsa-let-7a-5p	MPL
hsa-let-7a-5p	ATP2A2
hsa-let-7a-5p	MYO1E
hsa-let-7a-5p	ROGDI
hsa-let-7a-5p	EEA1
hsa-let-7a-5p	TMPRSS2
hsa-let-7a-5p	RPUSD3
hsa-let-7a-5p	COL4A3BP
hsa-let-7a-5p	RBMX
hsa-let-7a-5p	ATP5O
hsa-let-7a-5p	B4GALT6
hsa-let-7a-5p	PWWP2A
hsa-let-7a-5p	PKN3
hsa-let-7a-5p	UBE2J1
hsa-let-7a-5p	MYO9A
hsa-let-7a-5p	GTPBP4
hsa-let-7a-5p	MED13L
hsa-let-7a-5p	PHKA1
hsa-let-7a-5p	PDE12
hsa-let-7a-5p	H2AFX
hsa-let-7a-5p	CCR5
hsa-let-7a-5p	TNRC6A
hsa-let-7a-5p	PCYOX1
hsa-let-7a-5p	AVL9
hsa-let-7a-5p	CLPX
hsa-let-7a-5p	GLMN
hsa-let-7a-5p	CALU
hsa-let-7a-5p	CSNK1A1
hsa-let-7a-5p	SETD1A
hsa-let-7a-5p	ARHGEF17
hsa-let-7a-5p	ELL
hsa-let-7a-5p	IPO9
hsa-let-7a-5p	YIPF1
hsa-let-7a-5p	MYCBP
hsa-let-7a-5p	ZFHX2
hsa-let-7a-5p	DUSP7
hsa-let-7a-5p	GEMIN4
hsa-let-7a-5p	PMAIP1
hsa-let-7a-5p	SNAP23
hsa-let-7a-5p	BZRAP1
hsa-let-7a-5p	PXK
hsa-let-7a-5p	BDKRB2
hsa-let-7a-5p	RFTN1
hsa-let-7a-5p	EIF2AK4
hsa-let-7a-5p	OXR1
hsa-let-7a-5p	MAP3K9
hsa-let-7a-5p	TSSC4
hsa-let-7a-5p	RPS29
hsa-let-7a-5p	TPX2
hsa-let-7a-5p	NAT6
hsa-let-7a-5p	GPD2
hsa-let-7a-5p	ANKRD52
hsa-let-7a-5p	RABEP1
hsa-let-7a-5p	DNAJC11
hsa-let-7a-5p	RGS17
hsa-let-7a-5p	CEP290
hsa-let-7a-5p	LATS1
hsa-let-7a-5p	MAPK6
hsa-let-7a-5p	SIK1
hsa-let-7a-5p	ZFYVE20
hsa-let-7a-5p	C14orf166
hsa-let-7a-5p	LRCH3
hsa-let-7a-5p	ARPP19
hsa-let-7a-5p	SMIM12
hsa-let-7a-5p	CASP6
hsa-let-7a-5p	PRPF38B
hsa-let-7a-5p	SIM2
hsa-let-7a-5p	USP11
hsa-let-7a-5p	ZNF678
hsa-let-7a-5p	TUBA1C
hsa-let-7a-5p	RLF
hsa-let-7a-5p	TCERG1
hsa-let-7a-5p	GAN
hsa-let-7a-5p	GSTO1
hsa-let-7a-5p	OSBP2
hsa-let-7a-5p	RHOBTB2
hsa-let-7a-5p	TGFBR2
hsa-let-7a-5p	PPP2R5D
hsa-let-7a-5p	SACS
hsa-let-7a-5p	UBE2W
hsa-let-7a-5p	CLUH
hsa-let-7a-5p	SZT2
hsa-let-7a-5p	FKTN
hsa-let-7a-5p	FAM160B1
hsa-let-7a-5p	ZNF512B
hsa-let-7a-5p	NOD1
hsa-let-7a-5p	LRP11
hsa-let-7a-5p	SKI
hsa-let-7a-5p	ST3GAL6
hsa-let-7a-5p	IGDCC3
hsa-let-7a-5p	BMP2
hsa-let-7a-5p	C6orf136
hsa-let-7a-5p	RAB21
hsa-let-7a-5p	MLK4
hsa-let-7a-5p	IFI16
hsa-let-7a-5p	CDT1
hsa-let-7a-5p	STC2
hsa-let-7a-5p	PDIA3
hsa-let-7a-5p	WDR11
hsa-let-7a-5p	FAM83G
hsa-let-7a-5p	PHB2
hsa-let-7a-5p	CDK12
hsa-let-7a-5p	CAMK2D
hsa-let-7a-5p	PLCB1
hsa-let-7a-5p	CLTC
hsa-let-7a-5p	OR2AG1
hsa-let-7a-5p	SIN3A
hsa-let-7a-5p	RIMKLA
hsa-let-7a-5p	HOMER1
hsa-let-7a-5p	KLHL12
hsa-let-7a-5p	ATP7B
hsa-let-7a-5p	USP32
hsa-let-7a-5p	CDCA7L
hsa-let-7a-5p	RPL22L1
hsa-let-7a-5p	FKBP3
hsa-let-7a-5p	ATP5B
hsa-let-7a-5p	STK4
hsa-let-7a-5p	TRIB3
hsa-let-7a-5p	RAD54B
hsa-let-7a-5p	GTPBP10
hsa-let-7a-5p	FAM129B
hsa-let-7a-5p	COQ9
hsa-let-7a-5p	C15orf41
hsa-let-7a-5p	KIAA1522
hsa-let-7a-5p	KCTD12
hsa-let-7a-5p	EIF1AD
hsa-let-7a-5p	NCOA3
hsa-let-7a-5p	SESN1
hsa-let-7a-5p	MT-ND4
hsa-let-7a-5p	NADK
hsa-let-7a-5p	TMEM60
hsa-let-7a-5p	ZNF256
hsa-let-7a-5p	IRS2
hsa-let-7a-5p	ARHGAP28
hsa-let-7a-5p	SCYL1
hsa-let-7a-5p	QRICH1
hsa-let-7a-5p	UROD
hsa-let-7a-5p	KCTD3
hsa-let-7a-5p	PRPF8
hsa-let-7a-5p	TIMM21
hsa-let-7a-5p	SPIN1
hsa-let-7a-5p	COL18A1
hsa-let-7a-5p	ARHGEF40
hsa-let-7a-5p	RPS6KA2
hsa-let-7a-5p	SLC16A3
hsa-let-7a-5p	ZNF639
hsa-let-7a-5p	VCAM1
hsa-let-7a-5p	RARG
hsa-let-7a-5p	STARD13
hsa-let-7a-5p	FADD
hsa-let-7a-5p	USP12
hsa-let-7a-5p	CEP44
hsa-let-7a-5p	NSRP1
hsa-let-7a-5p	SLC7A1
hsa-let-7a-5p	MFHAS1
hsa-let-7a-5p	KIF1C
hsa-let-7a-5p	ADIPOR2
hsa-let-7a-5p	USP36
hsa-let-7a-5p	LANCL1
hsa-let-7a-5p	RIOK1
hsa-let-7a-5p	SLC35E3
hsa-let-7a-5p	E2F3
hsa-let-7a-5p	FAM49B
hsa-let-7a-5p	SOBP
hsa-let-7a-5p	SLC2A1
hsa-let-7a-5p	ITIH5
hsa-let-7a-5p	ALDH7A1
hsa-let-7a-5p	PCNXL3
hsa-let-7a-5p	ZCCHC9
hsa-let-7a-5p	ZC3HAV1
hsa-let-7a-5p	ZNF644
hsa-let-7a-5p	MOB4
hsa-let-7a-5p	NDOR1
hsa-let-7a-5p	INF2
hsa-let-7a-5p	SYPL1
hsa-let-7a-5p	BTG3
hsa-let-7a-5p	SRSF9
hsa-let-7a-5p	CCDC50
hsa-let-7a-5p	CCNG1
hsa-let-7a-5p	ADAM12
hsa-let-7a-5p	SLC31A1
hsa-let-7a-5p	FKBP1A
hsa-let-7a-5p	MTMR14
hsa-let-7a-5p	SLC52A3
hsa-let-7a-5p	NPR1
hsa-let-7a-5p	NFIA
hsa-let-7a-5p	C3orf38
hsa-let-7a-5p	SRCAP
hsa-let-7a-5p	TOP2A
hsa-let-7a-5p	CPSF1
hsa-let-7a-5p	FZD2
hsa-let-7a-5p	UBOX5
hsa-let-7a-5p	MDM2
hsa-let-7a-5p	SOCS4
hsa-let-7a-5p	MYO5B
hsa-let-7a-5p	PHF6
hsa-let-7a-5p	TAB3
hsa-let-7a-5p	TTC14
hsa-let-7a-5p	USP5
hsa-let-7a-5p	ANKRD46
hsa-let-7a-5p	COL1A2
hsa-let-7a-5p	ACTG1
hsa-let-7a-5p	TADA1
hsa-let-7a-5p	CUL2
hsa-let-7a-5p	TMED5
hsa-let-7a-5p	B3GNT1
hsa-let-7a-5p	ZNF589
hsa-let-7a-5p	CNOT11
hsa-let-7a-5p	BLM
hsa-let-7a-5p	APOLD1
hsa-let-7a-5p	GSPT1
hsa-let-7a-5p	JPH3
hsa-let-7a-5p	ZADH2
hsa-let-7a-5p	NARF
hsa-let-7a-5p	C20orf194
hsa-let-7a-5p	CD46
hsa-let-7a-5p	TCEAL8
hsa-let-7a-5p	CAMK4
hsa-let-7a-5p	AC004076.7
hsa-let-7a-5p	EIF4H
hsa-let-7a-5p	KANK3
hsa-let-7a-5p	TMEM33
hsa-let-7a-5p	AP5M1
hsa-let-7a-5p	HLA-DPA1
hsa-let-7a-5p	HOXB6
hsa-let-7a-5p	GLO1
hsa-let-7a-5p	ORMDL2
hsa-let-7a-5p	BRWD3
hsa-let-7a-5p	ADAMTS12
hsa-let-7a-5p	NDC1
hsa-let-7a-5p	GPR137C
hsa-let-7a-5p	FAM160A1
hsa-let-7a-5p	FAM98A
hsa-let-7a-5p	NCOR1
hsa-let-7a-5p	NEK7
hsa-let-7a-5p	IFT122
hsa-let-7a-5p	ATPAF1
hsa-let-7a-5p	LDHB
hsa-let-7a-5p	EDN1
hsa-let-7a-5p	UBE2G2
hsa-let-7a-5p	GALNT1
hsa-let-7a-5p	MYCN
hsa-let-7a-5p	MCAT
hsa-let-7a-5p	DMWD
hsa-let-7a-5p	ZDHHC21
hsa-let-7a-5p	ZFP36L2
hsa-let-7a-5p	RNF20
hsa-let-7a-5p	ERGIC2
hsa-let-7a-5p	ATXN1
hsa-let-7a-5p	FLRT2
hsa-let-7a-5p	RGMB
hsa-let-7a-5p	SF1
hsa-let-7a-5p	NUP153
hsa-let-7a-5p	CKAP4
hsa-let-7a-5p	EGLN2
hsa-let-7a-5p	PLBD2
hsa-let-7a-5p	APP
hsa-let-7a-5p	SHE
hsa-let-7a-5p	ABCC8
hsa-let-7a-5p	UTP11L
hsa-let-7a-5p	PCYT2
hsa-let-7a-5p	H2AFY2
hsa-let-7a-5p	DNA2
hsa-let-7a-5p	MBOAT2
hsa-let-7a-5p	CDC25A
hsa-let-7a-5p	integrin beta(3)
hsa-let-7a-5p	IGF-II
hsa-let-7a-5p	caspase-3
hsa-let-7a-5p	PRDM1/Blimp-1
hsa-let-7a-5p	c-myc
hsa-let-7a-5p	RAS
hsa-let-7a-5p	RAPGEF5
hsa-let-7a-5p	TNK2
hsa-let-7a-5p	DROSHA
hsa-let-7a-5p	NDST2
hsa-let-7a-5p	MSH6
hsa-let-7a-5p	RNF44
hsa-let-7a-5p	TRIM35
hsa-let-7a-5p	MANEAL
hsa-let-7a-5p	GIGYF1
hsa-let-7a-5p	LUC7L2
hsa-let-7a-5p	RB1CC1
hsa-let-7a-5p	CNOT6
hsa-let-7a-5p	RBM27
hsa-let-7a-5p	FOXK2
hsa-let-7a-5p	TUSC2
hsa-let-7a-5p	KMT2D
hsa-let-7a-5p	ZNF200
hsa-let-7a-5p	ITSN2
hsa-let-7a-5p	SMUG1
hsa-let-7a-5p	MLLT4
hsa-let-7a-5p	PEX19
hsa-let-7a-5p	ANKRD49
hsa-let-7a-5p	AK2
hsa-let-7a-5p	SLC25A27
hsa-let-7a-5p	ACLY
hsa-let-7a-5p	PRMT1
hsa-let-7a-5p	BLOC1S4
hsa-let-7a-5p	VGLL4
hsa-let-7a-5p	CRKL
hsa-let-7a-5p	COPB1
hsa-let-7a-5p	SLC6A8
hsa-let-7a-5p	SAT1
hsa-let-7a-5p	ABCC5
hsa-let-7a-5p	PURB
hsa-let-7a-5p	GPR17
hsa-let-7a-5p	GPR161
hsa-let-7a-5p	KDM2B
hsa-let-7a-5p	PKN2
hsa-let-7a-5p	HMOX2
hsa-let-7a-5p	RANBP2
hsa-let-7a-5p	SLC10A7
hsa-let-7a-5p	ONECUT2
hsa-let-7a-5p	MMS22L
hsa-let-7a-5p	C7orf73
hsa-let-7a-5p	PDCD4
hsa-let-7a-5p	GJC1
hsa-let-7a-5p	PAG1
hsa-let-7a-5p	LRRC47
hsa-let-7a-5p	USP1
hsa-let-7a-5p	CERS2
hsa-let-7a-5p	PARP1
hsa-let-7a-5p	GARS
hsa-let-7a-5p	PTOV1
hsa-let-7a-5p	NNT
hsa-let-7a-5p	MT-ND5
hsa-let-7a-5p	NAP1L1
hsa-let-7a-5p	WHSC1L1
hsa-let-7a-5p	ADAM10
hsa-let-7a-5p	B3GNT5
hsa-let-7a-5p	RB1
hsa-let-7a-5p	PRKCB
hsa-let-7a-5p	MAPRE3
hsa-let-7a-5p	DCAF7
hsa-let-7a-5p	NCAPD2
hsa-let-7a-5p	CLINT1
hsa-let-7a-5p	TSC22D3
hsa-let-7a-5p	KLHL42
hsa-let-7a-5p	TMEM41B
hsa-let-7a-5p	DDHD1
hsa-let-7a-5p	SPTBN2
hsa-let-7a-5p	PTGES3
hsa-let-7a-5p	PSMA2
hsa-let-7a-5p	SESN2
hsa-let-7a-5p	XYLT2
hsa-let-7a-5p	DDX6
hsa-let-7a-5p	MSN
hsa-let-7a-5p	ATXN7L3B
hsa-let-7a-5p	DUSP2
hsa-let-7a-5p	PPP4C
hsa-let-7a-5p	VCPIP1
hsa-let-7a-5p	MAP9
hsa-let-7a-5p	NUP160
hsa-let-7a-5p	SEMA4C
hsa-let-7a-5p	HELLS
hsa-let-7a-5p	ZNF710
hsa-let-7a-5p	MACC1
hsa-let-7a-5p	C11orf87
hsa-let-7a-5p	NID1
hsa-let-7a-5p	AP3M1
hsa-let-7a-5p	SNX19
hsa-let-7a-5p	LIPT2
hsa-let-7a-5p	DHX57
hsa-let-7a-5p	SP4
hsa-let-7a-5p	CREM
hsa-let-7a-5p	IGF1R
hsa-let-7a-5p	PLAGL1
hsa-let-7a-5p	LPAR1
[truncated: 323,241+ more rows]
